# Supplementary material for: Vaccination against COVID-19 and society’s return to normality in England: a modelling study of impacts of different types of naturally acquired and vaccine-induced immunity
Source: PubMed Central journal article supplement — BMJ Open. 2021 Nov 16;11(11):e053507. doi: 10.1136/bmjopen-2021-053507 (PMC8595291; doi:10.1136/bmjopen-2021-053507), 2021-11-16
Supplement: bmjopen-2021-053507.draft_revisions.pdf [file bmjopen-2021-053507.draft_revisions.pdf]

# BMJ Open

BMJ Open is committed to open peer review. As part of this commitment we make the peer review history of every article we publish publicly available.

When an article is published we post the peer reviewers' comments and the authors' responses online. We also post the versions of the paper that were used during peer review. These are the versions that the peer review comments apply to.

The versions of the paper that follow are the versions that were submitted during the peer review process. They are not the versions of record or the final published versions. They should not be cited or distributed as the published version of this manuscript.

BMJ Open is an open access journal and the full, final, typeset and author-corrected version of record of the manuscript is available on our site with no access controls, subscription charges or pay-per-view fees (<http://bmjopen.bmj.com>).

If you have any questions on BMJ Open's open peer review process please email [info.bmjopen@bmj.com](mailto:info.bmjopen@bmj.com)

# BMJ Open

## **Vaccination against COVID-19 and society's return to normality in England: a modelling study of impacts of different types of naturally acquired and vaccine induced immunity**

|                               |                                                                                                                                   |
|-------------------------------|-----------------------------------------------------------------------------------------------------------------------------------|
| Journal:                      | <i>BMJ Open</i>                                                                                                                   |
| Manuscript ID                 | bmjopen-2021-053507                                                                                                               |
| Article Type:                 | Original research                                                                                                                 |
| Date Submitted by the Author: | 17-May-2021                                                                                                                       |
| Complete List of Authors:     | Song, Fujian; University of East Anglia Norwich Medical School<br>Bachmann, Max; University of East Anglia Norwich Medical School |
| Keywords:                     | COVID-19, Infection control < INFECTIOUS DISEASES, Public health < INFECTIOUS DISEASES                                            |
|                               |                                                                                                                                   |

SCHOLARONE™  
Manuscripts

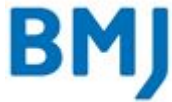

I, the Submitting Author has the right to grant and does grant on behalf of all authors of the Work (as defined in the below author licence), an exclusive licence and/or a non-exclusive licence for contributions from authors who are: i) UK Crown employees; ii) where BMJ has agreed a CC-BY licence shall apply, and/or iii) in accordance with the terms applicable for US Federal Government officers or employees acting as part of their official duties; on a worldwide, perpetual, irrevocable, royalty-free basis to BMJ Publishing Group Ltd ("BMJ") its licensees and where the relevant Journal is co-owned by BMJ to the co-owners of the Journal, to publish the Work in this journal and any other BMJ products and to exploit all rights, as set out in our [licence](#).

The Submitting Author accepts and understands that any supply made under these terms is made by BMJ to the Submitting Author unless you are acting as an employee on behalf of your employer or a postgraduate student of an affiliated institution which is paying any applicable article publishing charge ("APC") for Open Access articles. Where the Submitting Author wishes to make the Work available on an Open Access basis (and intends to pay the relevant APC), the terms of reuse of such Open Access shall be governed by a Creative Commons licence – details of these licences and which [Creative Commons](#) licence will apply to this Work are set out in our licence referred to above.

Other than as permitted in any relevant BMJ Author's Self Archiving Policies, I confirm this Work has not been accepted for publication elsewhere, is not being considered for publication elsewhere and does not duplicate material already published. I confirm all authors consent to publication of this Work and authorise the granting of this licence.

1  
2  
3  
4  
5 **Vaccination against COVID-19 and society's return to normality in**  
6 **England: a modelling study of impacts of different types of naturally**  
7 **acquired and vaccine induced immunity**  
8  
9  
10  
11  
12  
13  
14

15 Fujian Song<sup>1</sup>, Max O. Bachmann<sup>1</sup>  
16

17  
18  
19  
20 1. Norwich Medical School, University of East Anglia, Norwich, Norfolk, NR4 7TJ  
21  
22

23  
24  
25 Correspondence to:

26  
27 Fujian Song, email: [fujian.song@uea.ac.uk](mailto:fujian.song@uea.ac.uk)  
28  
29  
30  
31  
32

33 Text word count: 3,444  
34  
35  
36  
37  
38  
39  
40  
41  
42  
43  
44  
45  
46  
47  
48  
49  
50  
51  
52  
53  
54  
55  
56  
57  
58  
59  
60

## ABSTRACT

**Objectives:** To project impacts of mass vaccination against COVID-19, and investigate possible impacts of different types of naturally acquired and vaccine-induced immunity on future dynamics of SARS-CoV-2 transmission from 2021 to 2029 in England.

**Design:** deterministic, discrete-time population dynamic modelling.

**Participants:** Population in England.

**Interventions:** mass vaccination programmes.

**Outcome measures:** daily and cumulative number of deaths from COVID-19.

**Results:** If vaccine efficacy is  $\geq 70\%$ , the vaccine-induced sterilising immunity lasts  $\geq 182$  days, and the reinfectivity is greatly reduced (by  $\geq 40\%$ ), mass vaccination programmes can prevent further COVID-19 outbreaks in England. Under such optimistic scenarios, the cumulative number of COVID-19 deaths is estimated to be from 113,000 to 115,000 by the end of 2029 in England. However, under plausible scenarios with lower vaccine efficacy, shorter durability of immunity, and smaller reduction in reinfectivity, repeated vaccination programmes could not prevent further COVID-19 outbreaks.

**Conclusions:** Under optimistic scenarios, mass immunisation using efficacious vaccines may enable society safely to return to normality. However, under plausible scenarios with low vaccine efficacy and short durability of immunity, COVID-19 could continue to cause recurrent waves of severe morbidity and mortality despite frequent vaccinations. It is crucial to monitor the vaccination effects in the real world, and to better understand characteristics of naturally acquired and vaccine induced immunity against SARS-CoV-2.

## ARTICLE SUMMARY:

### Strengths and limitations of this study

- We used a population dynamic model to assess impacts of vaccination programmes on future dynamics of SARS-CoV-2 transmission dynamics, and to explicitly investigate the impacts of different types of immune responses to SARS-CoV-2 infection and vaccines on the COVID-19 epidemic in England.
- The model has been verified based on historically observed outcome data in England, and a large number of projection scenarios are explored.
- Findings from our study improves the understanding of key immunological parameters relevant to future SARS-CoV-2 transmission dynamics and vaccination strategies.
- This is a deterministic simulation model, and uncertainty in estimated parameters may have not been fully accommodated. There remain many uncertainties regarding durability and types of naturally acquired and vaccine-induced immunity.

## INTRODUCTION

The COVID-19 pandemic caused by the spread of SARS-CoV-2 virus has resulted in a huge number of deaths and severe disruptions of economies and social activities around the world. The spread of the SARS-CoV-2 virus can be suppressed by non-pharmaceutical interventions (NPIs) and lockdown measures.<sup>1</sup> Because of their disruptive socioeconomic consequences, lockdown restrictions cannot last indefinitely.

Only a few months after the initial identification of SARS-CoV-2 pathogen, there were more than 200 vaccine candidates in development globally.<sup>2</sup> Since December 2020, three vaccines against COVID-19 have been approved for use in the UK, and a vaccination programme has been started to rollout, prioritised primarily by age and comorbidity, with older people being vaccinated first.<sup>3</sup> Although mass vaccination is a promising strategy to enable society to safely return to normality, there is great uncertainty about COVID-19 vaccines, including their safety and efficacy, and durability of different types of protection after vaccination.

The protection of naturally acquired or vaccine-induced immune responses may be attributable to infection protection, disease reduction, and re-infectivity reduction.<sup>4</sup> Studies of diseases caused by other human coronaviruses (HCoVs) indicated that infection protection immunity is likely to be short-lived, while disease reduction and re-infectivity reduction are likely long lasting.<sup>5</sup> Therefore, we conducted a modelling study to investigate possible impacts of different types of naturally acquired and vaccine-induced immunity on future dynamics of SARS-CoV-2 transmission in England.

## METHODS

### Model structure

This is a deterministic discrete-time (day) population dynamic model, implemented with computational language R.<sup>6</sup> The population are classified into categories by sex, age (5-year age bands for age <10 years, and 10-year age bands for age ≥10 years), and COVID-19 infection status (figure 1). The main infection compartments include susceptible, exposed, infectious, recovered, and vaccinated. Here “exposed” refers to a pre-infectious status of infected individuals. Infected individuals are classified as asymptomatic or symptomatic, and symptomatic individuals are classified as not being isolated, self-isolated, and hospitalised. We assume that hospitalised patients are effectively isolated and no longer able to transmit the virus to the general population, but patients who self-isolate at home may transmit virus to household contacts. The recovered and vaccinated are protected from reinfection, but they may be reinfected if the immunity is short-lived.

## Parameters and data sources

Details on the model's structure (appendix figure 1), parameters (appendix table 1), source of data, and mathematical equations are available in Supplementary files. Initial parameter values were estimated based on a review of relevant literature, and key parameter estimates were adjusted so that the simulated numbers of COVID-19 deaths, hospitalised patients, and recovered individuals were as similar as possible to the data historically reported from March 2020 to January 2021 in England.<sup>7</sup>

We obtained population demographic statistics in England from the Office for National Statistics,<sup>8</sup> and the whole population is assumed to be susceptible to SARS-CoV-2 infection at the beginning of 2020. We assume incubation periods, infectious periods, days of hospital stay, and days of deaths after being infected, to be gamma distributed.<sup>9-11</sup> Age specific case fatality rates and hospitalisation rates of symptomatic cases were based on a study by Verity et al.<sup>11</sup> Average sex-and-age-specific rates of all-cause deaths in England during 2015-2019<sup>8</sup> are applied to people who are not infected with or recovered from COVID-19. We assumed that the number of births equals to the number of deaths each day, and did not consider the influence of population migration. We adjusted the number of individuals belonging to each age group at the beginning of a year since 2021, by shifting a proportion of them to the adjacent higher age group.

For simplicity, effects of NPI measures, including restrictions on social activities, contact tracing and testing, were materialised by changes in transmission risk per contact between a susceptible and an infectious individual,<sup>12</sup> and average numbers of contacts of the general population (appendix table 2 in supplementary files). We estimate that the transmission risk per contact between infectious and susceptible individuals was reduced by 32%, from 0.068 before the implementation of any NPIs to 0.046 by March 15, 2020 after implementing basic NPI measures. Because of the new virus variant (B.1.1.7),<sup>13</sup> the average transmission risk per contact was increased to 0.056 by the end of 2020. We assume that the transmission risk per contact from April to September is 20% lower than that from October to February, to incorporate the impact of seasonality on future projections since April 2021. We do not use the reproduction number as an input parameter, but derived the basic and effective reproduction numbers based on model's transmission parameters (equation 79 in Supplementary files).<sup>12 14</sup>

The sex-and-age-specific numbers of daily contacts per person were based on the UK data from a study of European countries.<sup>15</sup> We consider only the daily contacts of the general population and household contacts of individuals self-isolated at home. We estimated that the lockdown measures from March 24, 2020 reduced general population contacts by 60-85%, although household contacts were unchanged. The NPI measures were relaxed or strengthened over time, which were reflected in



1  
2 the assumed social contacts and transmission risk (Supplementary files). After rolling out vaccination,  
3 we assume that, since June 2021, social contracts are return to normal as before the pandemic in  
4 England, although basic hygienic measures would be maintained.  
5  
6

### 7 **Vaccination and projection scenarios**

8  
9  
10 Results of randomised controlled trials shown that vaccines were efficacious in reducing  
11 symptomatic diseases, compared with placebo.<sup>16 17</sup> Vaccination of prioritised individuals began from  
12 8 December 2020 in England and around 2 million individuals were vaccinated (mostly with a single  
13 dose) by January 10, 2021.<sup>18</sup> For simplicity, we assume that the mass vaccination starts from January  
14 1, 2021 with a 80% coverage of eligible individuals, and the maximum number of individuals  
15 vaccinated daily is 300,000. The mass vaccination is modelled as an age-based phase approach,  
16 starting from people aged  $\geq 70$ , followed by individuals aged 60-69, 50-59, 20-49, and then those  
17 aged 16-19. Although both Pfizer-BioNTec and AstraZeneca vaccines are 2-dose regimens, the policy  
18 in the UK has been to initially provide the first dose to as many adults as possible. Data from clinical  
19 trials indicated that the short-term vaccine efficacy after the first dose of the Pfizer-BioNTech and the  
20 AstraZeneca vaccine is, respectively, about 90% and 70%.<sup>16</sup> For simplicity, we do not separate single  
21 or double dose vaccination, and assume a range of the overall vaccine efficacy (90%, 70% or 50%)  
22 and the protection effects start 14 days after vaccination.  
23  
24  
25  
26  
27  
28  
29  
30  
31

32 The reduction in symptomatic cases in vaccinated individuals may be due to induced antibodies in  
33 susceptible individuals (infection protection), or a lower proportion of infected individuals being  
34 symptomatic (i.e., disease reduction), or a combination of both. There are many different possible  
35 combinations of infection protection and disease reduction for a given overall vaccine efficacy in  
36 reducing symptomatic cases (appendix figure 2 in supplementary files). We assume that vaccine  
37 efficacy for reducing symptomatic cases is equally attributable to infection reduction and disease  
38 reduction in the main projections. For vaccines with 90%, 70% and 50% overall efficacy, the equal  
39 partial efficacy for the infection protection and for disease reduction is around 69%, 45%, and 29%,  
40 respectively (see Supplementary files for details).  
41  
42  
43  
44  
45  
46  
47

48 Immune responses against COVID-19 infection, either naturally acquired from past infection or  
49 vaccine-induced, may reduce individuals' susceptibility to infection (sterilising or infection protection  
50 immunity), reduce pathology so that disease is less severe after being infected (disease reduction  
51 immunity), and reduce infectivity of those who are reinfected after the waning of immunity  
52 (reinfectivity reduction immunity).<sup>4</sup> According to immunological characteristics of other HCoVs,  
53 infection protection immunity may wane after a short period, while disease protection and  
54 reinfectivity reduction immunity are likely longer lasting.<sup>5</sup> For example, antibodies against SARS-CoV-  
55 1 virus in recovered patients was no longer detectable after 2-3 years, while specific memory T cells  
56  
57  
58  
59  
60

1  
2 remained detected after 11 years.<sup>19</sup> Therefore, we assume that the disease reduction and  
3 re infectivity reduction immunity are long lasting (>10 years).<sup>5</sup> We assume that naturally acquired  
4 sterilising immunity lasts for 365 or 730 days, and vaccine-induced sterilising immunity lasts for 182,  
5 365 or 730 days. Available evidence indicated that the viral loads and the duration of virus shedding  
6 in the infected individuals after vaccination were considerably reduced, compared with unvaccinated  
7 individuals.<sup>20 21</sup> Therefore, we assume that re infectivity after waning of sterilising immunity is  
8 reduced by 20%, 40% or 60%. In this study, we assume that the infectivity of ineffectively vaccinated  
9 individuals is the same as individuals after waning of sterilising immunity, and vaccination of  
10 individuals recovered from natural infection prevents or delays the waning of their sterilising  
11 immunity.  
12  
13  
14  
15  
16  
17  
18

19 We run the model and calibrate key transmission parameters by visually comparing estimated  
20 numbers of daily COVID-19 deaths, and hospitalised patients, with official records from January 1,  
21 2020 to January 31, 2021 in England. We used estimates of transmission parameters by the end of  
22 January 2021 to project COVID-19 deaths from 2021 to 2029, under various scenarios of vaccine  
23 efficacy, durability and protection characteristics of naturally acquired and vaccine-induced  
24 immunity. The number of deaths from SARS-CoV-2 infections is the main endpoint in this study.  
25  
26  
27  
28  
29

### 30 **Patient and public involvement**

31  
32 No patients and the public were involved in this literature and secondary data based, computational  
33 modelling study.  
34  
35  
36  
37  
38

## 39 **RESULTS**

40  
41 Our derived basic reproduction number ( $R_0$ ) was 3.68 at the initial stage of the COVID-19 epidemic in  
42 England (appendix figure 3 in supplementary files). After implementing NPI and lockdown measures,  
43 the effective reproduction value ( $R_t$ ) was reduced to 0.66 from March 24, 2020. Thereafter, the  $R_t$   
44 values fluctuated along with changing NPI policies, and our estimated  $R$  values during March 2020  
45 and January 2021 were within the ranges reported in England (Appendix figure 3 in Supplementary  
46 files).<sup>22</sup> The estimated prevalence of SARS-CoV-2 infection (appendix figure 4), the number of  
47 hospitalised COVID-19 patients (appendix figure 5), and the estimated daily deaths from COVID-19  
48 (appendix figure 6) are well matched with the reported data from March 2020 to January 2021 in  
49 England (Supplementary files).  
50  
51  
52  
53  
54  
55  
56  
57  
58  
59  
60

## Vaccine efficacy, immunity durability, and reinfectivity

Figure 2 shows the impacts of partial vaccine efficacy regarding disease reduction relative to infection protection, durability of immunity, and reinfectivity, given the same overall vaccine efficacy (70%) in reducing symptomatic cases. There are three general inferences. As expected, the number of COVID-19 deaths is smaller following a greater reduction in reinfectivity (figure 2A, 2B, 2C). Second, a greater reduction in reinfectivity makes the durability of immunity less influential, if a vaccine is efficacious for infection protection (figure 2c). Third, the greater the infection protection by a vaccine, the smaller the number of COVID-19 deaths, although there are exceptions (figure 2A). A combination of a shorter duration of immunity and smaller reduction in the reinfectivity makes the disease reduction efficacy more important.

## Population susceptibility and COVID-19 outbreaks

Changes in the prevalence of susceptible individuals and daily peaks of COVID-19 deaths in England during 2020 and 2029 are shown in figure 3 (additional details in supplementary table 1), under assumptions of 90% vaccine efficacy, 40% reduction in reinfectivity after waning of sterilising immunity, and different durations of naturally acquired and vaccine-induced sterilising immunity.

The prevalence of susceptible individuals is reduced to <30% after a single wave of mass vaccination starting from January 2021, but starts to increase from January 2022, if the duration of vaccine immunity is 365 days (figure 3A). The raised prevalence of susceptible individuals leads to an outbreak with a high peak (n=1,394) of daily COVID-19 deaths in November 2023. The prevalence of the susceptible is reduced to about 47% by the natural infection during the outbreak, then increases to >90% by the end of 2025 due to waning of immunity, which is followed with a new outbreak from December 2029. Clearly, a single wave of mass vaccination is insufficient if the immune response is short-lived. Three waves of repeated annual revaccination programmes delay the new outbreak, with a peak (n=632) of daily COVID-19 deaths in March 2027 (figure 3B). Five repeated waves of annual revaccination programmes almost prevent any new outbreaks before the end of 2029 (figure 3C).

If the vaccine immunity lasts only 182 days, the prevalence of susceptible individuals starts to increase six months after vaccination (figure 3D, 3E, 3F). A single wave of mass vaccination is followed with two new peaks of daily COVID-19 deaths (figure 3D), and the three and five repeated waves of annual vaccination programmes result in corresponding changes in the prevalence of susceptible individuals, each with a single peak of daily COVID-19 deaths (figure 3E, 3F). If the vaccine immunity lasts only 182 days, the annual mass vaccination programmes are insufficient to sustain a constantly low prevalence of the susceptible, and the prevalence of the susceptible fluctuates up and down biannually (figure 3E, 3F). Notably, the COVID-19 outbreaks start about two years after

1  
2 stopping the annual mass vaccination programmes, due to the assumed duration of natural  
3 immunity (730 days).  
4

### 6 **Total COVID-19 deaths under various scenarios**

7  
8 The projected total numbers of COVID-19 deaths during 2020-2029, under various scenarios, are  
9 shown in table 1 (more details in Supplementary table 2). If there no waning of immunity, a single  
10 mass vaccination programme prevents COVID-19 outbreaks after returning to normality. If there is  
11 waning of sterilising immunity, mass vaccination programmes may prevent further COVID-19  
12 outbreaks under scenarios with high vaccine efficacy, longer lasting immunity, and large reduction in  
13 reinfectivity after waning of sterilising immunity. Under optimistic scenarios, the cumulative number  
14 of COVID-19 deaths is estimated to be from 113,000 to 115,000 by the end of 2029 in England.  
15 However, the total number of COVID-19 deaths may be up to 754,000 by the end of 2029, under the  
16 scenario with low vaccine efficacy (50%), short duration of sterilising immunity, and high reinfectivity  
17 (table 1).  
18  
19

20  
21 If the overall vaccine efficacy is 90%, the natural immunity lasts 730 days on average and the  
22 reinfectivity after immunity waning is reduced by 60%, two repeated annual vaccination programmes  
23 are able to prevent further outbreaks, even if the duration of the vaccine immunity is only 180 days.  
24 However, if the reinfectivity is reduced by 40%, five to nine annual revaccination programmes are  
25 required, depending on durability of immunity. If both the natural and vaccine immunity are short-  
26 lived (365 day and 180 days, respectively), and the reduction in reinfectivity is smaller (e.g., by 40%  
27 or 20%), further COVID-19 outbreaks cannot be prevented by repeated annual vaccination  
28 programmes (table 1).  
29

30  
31 If vaccine efficacy is 70%, the duration of natural immunity lasts 730 days and the reinfectivity is  
32 reduced by 60%, two to three annual vaccination programmes can prevent further COVID-19  
33 outbreaks (table 1). If the sterilising immunity is short-lived (for 365 or 182 days only) and the  
34 reduction in reinfectivity is low (e.g., by only 20%), the annual mass vaccination programmes are not  
35 able to prevent further COVID-19 outbreaks. Similarly, when the vaccine efficacy is 50%, annual mass  
36 vaccination programmes prevent further COVID-19 outbreaks, only if the sterilising immunity is long  
37 lasting and the reduction in reinfectivity is large.  
38

### 51 **Intervals between immunisation programmes**

52  
53 Results of sensitivity analyses based on vaccination programmes every two years or twice a year are  
54 shown in supplementary table 3. Programmes every two years can prevent COVID-19 outbreaks in  
55 scenarios with longer duration of sterilising immunity and larger reduction in reinfectivity. In  
56 addition, biannual vaccination programmes (twice a year) are more effective in reducing COVID-19  
57  
58  
59  
60

1  
2 deaths, compared with annual programmes, in scenarios with low vaccine efficacy, short duration of  
3 sterilising immunity, and small reduction in reinfectivity. For example, in the scenario of 70% vaccine  
4 efficacy, 365 and 182 days of natural and vaccine immunity respectively, and 20% reduction in  
5 reinfectivity, the total number of COVID-19 deaths is estimated to be around 524,000 by annual  
6 vaccination programmes (table 1), which is reduced to around 228,000 by biannual vaccination  
7 programmes (Supplementary table-3). However, because a wave of mass vaccination of 80%  
8 individuals aged  $\geq 16$  years takes more than five months to complete, repeated vaccination every six  
9 months may not be practically feasible.

## 17 18 19 **DISCUSSIONS**

20  
21 Mass immunisation using efficacious vaccines may enable society safely to return to normality.  
22 Repeated vaccination programmes may be required to prevent further COVID-19 outbreaks,  
23 depending on vaccine efficacy, the durability and characteristics of different types of immune  
24 response to naturally acquired and vaccine-induced immune responses. Evidence on diseases caused  
25 by other common HCoVs indicated that the infection protection immunity may be short-lived, but  
26 the disease reduction and the reinfectivity reduction immunity are likely to be longer lasting.<sup>5</sup> We  
27 found that, if reinfectivity is greatly reduced (e.g., by 60%), two or three repeated annual mass  
28 vaccination programmes prevent further COVID-19 outbreaks, even if the vaccine induced sterilising  
29 immunity lasts only 182 days. Under such optimistic scenarios, the cumulative number of COVID-19  
30 deaths during 2020-2029 in England is estimated to be around 113,000. If both the natural and  
31 vaccine immunity are short-lived (365 and 180 days, respectively), and reinfectivity is reduced only  
32 by 40% or 20%, further COVID-19 outbreaks cannot be prevented by annual vaccination  
33 programmes. The total number of COVID-19 deaths is estimated to be around 754,000 by the end of  
34 2029, under a pessimistic scenario with low vaccine efficacy (50%), short duration of sterilising  
35 immunity, and high reinfectivity.

36  
37 There were several published modelling studies of vaccination against COVID-19 in the UK.<sup>23-26</sup> Two  
38 studies assessed impacts of the relaxation of social restriction after vaccination,<sup>24 25</sup> and one study  
39 assessed impacts of vaccination on hospital admissions,<sup>26</sup> but covered a shorter time horizon and did  
40 not consider waning of immunity. Another study of SARS-CoV-2 vaccination in the UK focused on  
41 economic evaluations.<sup>26</sup> Compared with previous studies, our study has separately considered the  
42 durability of naturally acquired and vaccine induced immunity, over a 10 year period from 2020 to  
43 2029, and compared a wider range of plausible scenarios. We explicitly investigated the impacts of  
44 different types of immune responses to SARS-CoV-2 infection and vaccines on the COVID-19  
45 epidemic in a country. Findings from our study will improve the understanding of key immunological

1  
2 parameters relevant to future changes in SARS-CoV-2 transmission dynamics and vaccination  
3 strategies.  
4

5  
6 Evidence from randomised controlled trials showed that vaccines against SARS-CoV-2 are efficacious  
7 in reducing symptomatic COVID-19 cases, compared with placebo.<sup>17</sup> The reduction in symptomatic  
8 cases in the vaccine group may be attributable to infection protection or disease reduction. Available  
9 evidence showed that vaccines reduced the risk of SARS-CoV-2 virus infection in vaccinated  
10 individuals,<sup>27</sup> and household members of vaccinated healthcare workers has a lower risk of COVID-19  
11 infection than those of unvaccinated.<sup>28</sup> In this study, we explored the impacts of different  
12 proportions of a vaccine's infection protection efficacy and disease reduction efficacy. Different  
13 combinations of the two efficacy components have impacts on the transmission dynamics,  
14 depending on the duration of immune response and reinfectivity after waning of sterilising  
15 immunity. Because of lack of data, we assumed that vaccine efficacy is equally attributable to the  
16 infection and disease reduction immunity.  
17  
18  
19  
20  
21  
22  
23

24  
25 We assumed a range of overall vaccine efficacy, including 50%, 70% and 90%, without considering  
26 doses of vaccines. As most vaccinated individuals will eventually receive the second dose of vaccine,  
27 we might have under-estimated vaccine efficacy. On the other hand, vaccines that are efficacious  
28 against current SARS-CoV-2 virus may become less efficacious against new virus variants. Although  
29 the impact of new virus variants on the vaccine efficacy was not explicitly considered, the analysis  
30 included scenarios with a low vaccine efficacy (50%). In addition, we assume that there will be no  
31 important safety issues for vaccines licensed to use. We focused on the impacts and interactions of  
32 vaccine efficacy, different types of immune response to SARS-CoV-2, and assumed no more  
33 restrictions by NPI measures after return to normality in England from June 2021. Therefore, the  
34 pessimistic scenarios in our analyses may not be allowed to happen in the real world, as NPI  
35 (including lockdown) measures may be introduced again if the vaccination programmes are  
36 insufficient to avoid the new outbreaks of COVID-19.  
37  
38  
39  
40  
41  
42  
43  
44

45  
46 This is a deterministic simulation model, and uncertainty in estimated parameters may have not  
47 been fully accommodated. For simplicity, stochastic uncertainty, to quantify confidence intervals  
48 around the model's outputs, was not modelled. However, the model has been verified based on  
49 historically observed outcome data in England,<sup>7</sup> and a large number of projection scenarios are  
50 explored. Although many uncertainties remain, including durability and types of naturally acquired  
51 and vaccine-induced immunity, our model can be updated to assess vaccination strategies, as new  
52 evidence emerges.  
53  
54  
55  
56  
57  
58  
59  
60

## Conclusions

Under optimistic scenarios, mass immunisation using efficacious vaccines may enable society safely to return to normality. However, under plausible scenarios with low vaccine efficacy and short durability of immunity, COVID-19 could continue to cause recurrent waves of severe morbidity and mortality despite frequent vaccinations, and necessitate stringent NPI restrictions. It is crucial to monitor the vaccination effects in the real world, and to better understand characteristics of naturally acquired and vaccine induced immunity against SARS-CoV-2.

For peer review only

## ACKNOWLEDGEMENT

**Contributors:** FS designed, developed the model, retrieved data for estimating parameters, conducted computational calculations, and prepared the draft manuscript. MOB provided methodological support, helped interpret results and critically revised the draft manuscript. FS accepts full responsibility for the work and/or the conduct of the study, had access to the data, and controlled the decision to publish.

**Competing interests:** No competing interests declared.

**Funding:** There are no specific funding received for this study

**Data sharing statement:** All data relevant to the study are included in the article or uploaded as online supplementary information.

**Patient consent for publication:** Not required.

**Ethics approval statement:** Not applicable. No human participants involved in this modelling study using data from published or openly accessible sources.



## FIGURE LEGENDS:

**Figure 1: Modelling COVID-19 epidemics in England - main compartments and transitions across status**

**Figure 2: Projected numbers of COVID-19 deaths with different combinations of infection and disease protection vaccine efficacy, durability of immune response, and reduction in reinfectivity.**

The cumulative number of COVID-19 deaths in England by the end of 2029, after nine repeated annual vaccinations of 80% individuals aged  $\geq 16$  during 2021-2029. The overall vaccine efficacy was 70%; "0.00/0.70" refers to all vaccine efficacy attributable to disease protection, "0.45/0.45" refers to equal infection and disease protection, "0.70/0.00" refers to all efficacy attributable to infection protection. Duration of immunity: "365/182" refers to 365 days of natural immunity and 182 days vaccine immunity, "365/365" refers to 365 days natural and vaccine immunity, "730/365" refers to 730 and 365 days, respectively, natural and vaccine immunity. Figure 2A, 2B and 2C show results under the assumption of 20%, 40% and 60% reduction in reinfectivity.

**Figure 3 Projected peaks of daily COVID-19 deaths and the prevalence of susceptible individuals (%) during 2020-2029 under scenarios with different immunity durability and vaccine strategies.** We assume 90% vaccine efficacy; 80% coverage of individuals aged  $\geq 16$ ; 40% reduction in reinfectivity and 730 days natural immunity for all scenarios in Figure 3. We assume 365 days (Figure 3A, 3B, 3C) or 182 days (Figure 3D, 3E, 3F) vaccine immunity, and single vaccination (Figure 3A, 3D), three annual vaccination (Figure 3B, 3E), or five annual vaccination programmes (Figure 3C, 3F).

## ONLINE SUPPLEMENTARY MATERIALS

**Supplementary Files:** Model structure, data sources, model parameters, and mathematical equations

**Supplementary Tables:** Additional results of relevant scenarios

## REFERENCES

1. Islam N, Sharp SJ, Chowell G, et al. Physical distancing interventions and incidence of coronavirus disease 2019: natural experiment in 149 countries. *Bmj* 2020;370:m2743. doi: 10.1136/bmj.m2743 [published Online First: 2020/07/17]
2. Krammer F. SARS-CoV-2 vaccines in development. *Nature* 2020;586(7830):516-27. doi: 10.1038/s41586-020-2798-3
3. Bingham K. The UK Government's Vaccine Taskforce: strategy for protecting the UK and the world. *Lancet* 2020 doi: 10.1016/s0140-6736(20)32175-9 [published Online First: 2020/10/31]
4. Hodgson SH, Mansatta K, Mallett G, et al. What defines an efficacious COVID-19 vaccine? A review of the challenges assessing the clinical efficacy of vaccines against SARS-CoV-2. *Lancet Infect Dis* 2020 doi: 10.1016/s1473-3099(20)30773-8 [published Online First: 2020/10/31]
5. Lavine JS, Bjornstad ON, Antia R. Immunological characteristics govern the transition of COVID-19 to endemicity. *Science (New York, NY)* 2021;371(6530):741-45. doi: 10.1126/science.abe6522 [published Online First: 2021/01/14]
6. R Core Team. R: A language and environment for statistical computing. R Foundation for Statistical Computing, Vienna, Austria. URL <https://www.R-project.org/>. 2019
7. Gov.uk. Coronavirus (COVID-19) in the UK. 2021 [updated 22/04/2021. Available from: <https://coronavirus.data.gov.uk/details/about-data>.
8. Office for National Statistics. Dataset: 2018-based National population projections table of contents, 2018.
9. Ferguson N, Laydon D, Nedjati-Gilani G, et al. Impact of non-pharmaceutical interventions (NPIs) to reduce COVID-19 mortality and healthcare demand.: Imperial College COVID-19 Response Team., 2020.
10. Zhang J, Litvinova M, Wang W, et al. Evolving epidemiology and transmission dynamics of coronavirus disease 2019 outside Hubei province, China: a descriptive and modelling study. *Lancet Infect Dis* 2020 doi: 10.1016/s1473-3099(20)30230-9 [published Online First: 2020/04/06]
11. Verity R, Okell LC, Dorigatti I, et al. Estimates of the severity of coronavirus disease 2019: a model-based analysis. *Lancet Infect Dis* 2020 doi: 10.1016/s1473-3099(20)30243-7 [published Online First: 2020/04/03]
12. Rock K, Brand S, Moir J, et al. Dynamics of infectious diseases. *Rep Prog Phys* 2014;77(2):026602. doi: 10.1088/0034-4885/77/2/026602 [published Online First: 2014/01/22]
13. Mahase E. Covid-19: What have we learnt about the new variant in the UK? *Bmj* 2020;371:m4944. doi: 10.1136/bmj.m4944 [published Online First: 2020/12/29]
14. Giordano G, Blanchini F, Bruno R, et al. Modelling the COVID-19 epidemic and implementation of population-wide interventions in Italy. *Nature medicine* 2020;26(6):855-60. doi: 10.1038/s41591-020-0883-7 [published Online First: 2020/04/24]
15. Mossong J, Hens N, Jit M, et al. Social contacts and mixing patterns relevant to the spread of infectious diseases. *PLoS Med* 2008;5(3):e74. doi: 10.1371/journal.pmed.0050074 [published Online First: 2008/03/28]
16. Department of Health and Social Care. Optimising the covid-19 vaccination programme for maximum short-term impact. 2021 [Available from: <https://www.gov.uk/government/publications/prioritising-the-first-covid-19-vaccine-dose-jcvi-statement/optimising-the-covid-19-vaccination-programme-for-maximum-short-term-impact>.
17. Mallapaty S. Can COVID vaccines stop transmission? Scientists race to find answers. *Nature* 2021 doi: 10.1038/d41586-021-00450-z [published Online First: 2021/02/21]
18. Mahase E. Covid-19: UK approves Pfizer and BioNTech vaccine with rollout due to start next week. 2020;371:m4714. doi: 10.1136/bmj.m4714 %J BMJ
19. Le Bert N, Tan AT, Kunasegaran K, et al. SARS-CoV-2-specific T cell immunity in cases of COVID-19 and SARS, and uninfected controls. *Nature* 2020;584(7821):457-62. doi: 10.1038/s41586-020-2550-z [published Online First: 2020/07/16]

- 1  
2  
3  
4  
5  
6  
7  
8  
9  
10  
11  
12  
13  
14  
15  
16  
17  
18  
19  
20  
21  
22  
23  
24  
25  
26  
27  
28  
29  
30  
31  
32  
33  
34  
35  
36  
37  
38  
39  
40  
41  
42  
43  
44  
45  
46  
47  
48  
49  
50  
51  
52  
53  
54  
55  
56  
57  
58  
59  
60
20. Levine-Tiefenbrun M, Yelin I, Katz R, et al. Decreased SARS-CoV-2 viral load following vaccination. 2021:2021.02.06.21251283. doi: 10.1101/2021.02.06.21251283 %J medRxiv
  21. Emary KRW, Golubchik T, Aley PK, et al. Efficacy of ChAdOx1 nCoV-19 (AZD1222) Vaccine Against SARS-CoV-2 VOC 202012/01 (B.1.1.7). SSRN [Preprint]. 2021. DOI: 10.2139/ssrn.3779160. Available at: [https://papers.ssrn.com/sol3/papers.cfm?abstract\\_id=3779160](https://papers.ssrn.com/sol3/papers.cfm?abstract_id=3779160) 2021
  22. Government Office for Science and Scientific Advisory Group for Emergencies. Guidance: The R number and growth rate in the UK. From Government Office for Science and Scientific Advisory Group for Emergencies. 2020 [updated Last updated 2 October 2020. Available from: <https://www.gov.uk/guidance/the-r-number-in-the-uk#contents> accessed 08/10/2020.
  23. Cook TM, Roberts JV. Impact of vaccination by priority group on UK deaths, hospital admissions and intensive care admissions from COVID-19. *Anaesthesia* 2021;76(5):608-16. doi: 10.1111/anae.15442 [published Online First: 2021/02/12]
  24. Miles DK, Heald AH, Stedman M. How fast should social restrictions be eased in England as COVID-19 vaccinations are rolled out? *International journal of clinical practice* 2021:e14191. doi: 10.1111/ijcp.14191 [published Online First: 2021/04/01]
  25. Moore S, Hill EM, Tildesley MJ, et al. Vaccination and non-pharmaceutical interventions for COVID-19: a mathematical modelling study. *Lancet Infect Dis* 2021 doi: 10.1016/s1473-3099(21)00143-2 [published Online First: 2021/03/22]
  26. Sandmann FG, Davies NG, Vassall A, et al. The potential health and economic value of SARS-CoV-2 vaccination alongside physical distancing in the UK: a transmission model-based future scenario analysis and economic evaluation. *Lancet Infect Dis* 2021 doi: 10.1016/s1473-3099(21)00079-7 [published Online First: 2021/03/22]
  27. Hall VJ, Foulkes S, Charlett A, et al. SARS-CoV-2 infection rates of antibody-positive compared with antibody-negative health-care workers in England: a large, multicentre, prospective cohort study (SIREN). *Lancet* 2021;397(10283):1459-69. doi: 10.1016/s0140-6736(21)00675-9 [published Online First: 2021/04/13]
  28. V Shah AS, Gribben C, Bishop J, et al. Effect of vaccination on transmission of COVID-19: an observational study in healthcare workers and their households. 2021:2021.03.11.21253275. doi: 10.1101/2021.03.11.21253275 %J medRxiv

**Table 1. Projected total COVID-19 deaths by the end of 2029 in England under various scenarios**

Notes to Table 1: We assume annual vaccination covers 80% of individuals aged  $\geq 16$  years, and the overall vaccine efficacy is equally attributable to the infection and disease protection. The maximum number of waves of annual mass vaccination is nine during 2021-2029. Results in the table are from scenarios with the possibly minimum numbers of waves of annual vaccination that prevent any further COVID-19 outbreaks during 2022-2029 under a given scenario, or those in which further COVID-19 outbreaks cannot be prevented by the maximum number of annual mass vaccination programmes.

| Scenario | Waves of annual vaccination | Overall vaccine efficacy | Reduction in reinfectivity | Immunity duration (days) |           | Total COVID-19 deaths (2020-2029) |
|----------|-----------------------------|--------------------------|----------------------------|--------------------------|-----------|-----------------------------------|
|          |                             |                          |                            | Natural                  | Vaccine   |                                   |
| st1-01   | 1                           | 90%                      | 60%                        | >10 years                | >10 years | 112,815                           |
| st1-02   | 2                           | 90%                      | 60%                        | 730                      | 730       | 112,815                           |
| st1-03   | 2                           | 90%                      | 60%                        | 730                      | 365       | 112,815                           |
| st1-04   | 2                           | 90%                      | 60%                        | 730                      | 182       | 112,815                           |
| st1-05   | 3                           | 90%                      | 60%                        | 365                      | 365       | 112,870                           |
| st1-06   | 3                           | 90%                      | 60%                        | 365                      | 182       | 112,870                           |
| st1-07   | 1                           | 90%                      | 40%                        | >10 years                | >10 years | 112,878                           |
| st1-08   | 5                           | 90%                      | 40%                        | 730                      | 730       | 112,878                           |
| st1-09   | 6                           | 90%                      | 40%                        | 730                      | 365       | 112,878                           |
| st1-10   | 9                           | 90%                      | 40%                        | 730                      | 182       | 112,878                           |
| st1-11   | 7                           | 90%                      | 40%                        | 365                      | 365       | 112,986                           |
| st1-12   | 9                           | 90%                      | 40%                        | 365                      | 182       | 112,986                           |
| st1-13   | 1                           | 90%                      | 20%                        | >10 years                | >10 years | 112,942                           |
| st1-14   | 7                           | 90%                      | 20%                        | 730                      | 730       | 112,942                           |
| st1-15   | 9                           | 90%                      | 20%                        | 730                      | 365       | 114,351                           |
| st1-16   | 9                           | 90%                      | 20%                        | 730                      | 182       | 137,484                           |
| st1-17   | 9                           | 90%                      | 20%                        | 365                      | 365       | 133,713                           |
| st1-18   | 9                           | 90%                      | 20%                        | 365                      | 182       | 237,701                           |
| st1-19   | 1                           | 70%                      | 60%                        | >10 years                | >10 years | 114,065                           |
| st1-20   | 2                           | 70%                      | 60%                        | 730                      | 730       | 114,065                           |
| st1-21   | 3                           | 70%                      | 60%                        | 730                      | 365       | 114,065                           |
| st1-22   | 3                           | 70%                      | 60%                        | 730                      | 182       | 114,065                           |
| st1-23   | 3                           | 70%                      | 60%                        | 365                      | 365       | 114,223                           |
| st1-24   | 5                           | 70%                      | 60%                        | 365                      | 182       | 115,782                           |
| st1-25   | 1                           | 70%                      | 40%                        | >10 years                | >10 years | 114,271                           |
| st1-26   | 6                           | 70%                      | 40%                        | 730                      | 730       | 114,271                           |
| st1-27   | 8                           | 70%                      | 40%                        | 730                      | 365       | 114,271                           |
| st1-28   | 9                           | 70%                      | 40%                        | 730                      | 182       | 129,197                           |
| st1-29   | 9                           | 70%                      | 40%                        | 365                      | 365       | 139,064                           |
| st1-30   | 9                           | 70%                      | 40%                        | 365                      | 182       | 208,516                           |
| st1-31   | 1                           | 70%                      | 20%                        | >10 years                | >10 years | 115,004                           |
| st1-32   | 9                           | 70%                      | 20%                        | 730                      | 730       | 128,318                           |
| st1-33   | 9                           | 70%                      | 20%                        | 730                      | 365       | 163,962                           |
| st1-34   | 9                           | 70%                      | 20%                        | 730                      | 182       | 200,252                           |
| st1-35   | 9                           | 70%                      | 20%                        | 365                      | 365       | 316,166                           |
| st1-36   | 9                           | 70%                      | 20%                        | 365                      | 182       | 524,396                           |
| st1-37   | 1                           | 50%                      | 60%                        | >10 years                | >10 years | 115,414                           |
| st1-38   | 3                           | 50%                      | 60%                        | 730                      | 730       | 115,414                           |
| st1-39   | 3                           | 50%                      | 60%                        | 730                      | 365       | 115,414                           |
| st1-40   | 3                           | 50%                      | 60%                        | 730                      | 182       | 115,419                           |
| st1-41   | 9                           | 50%                      | 60%                        | 365                      | 365       | 117,163                           |

|    |        |   |     |     |           |           |         |
|----|--------|---|-----|-----|-----------|-----------|---------|
| 1  |        |   |     |     |           |           |         |
| 2  | st1-42 | 9 | 50% | 60% | 365       | 182       | 125,400 |
| 3  | st1-43 | 1 | 50% | 40% | >10 years | >10 years | 116,605 |
| 4  | st1-44 | 9 | 50% | 40% | 730       | 730       | 116,693 |
| 5  | st1-45 | 9 | 50% | 40% | 730       | 365       | 135,263 |
| 6  | st1-46 | 9 | 50% | 40% | 730       | 182       | 165,916 |
| 7  | st1-47 | 9 | 50% | 40% | 365       | 365       | 236,326 |
| 8  | st1-48 | 9 | 50% | 40% | 365       | 182       | 316,759 |
| 9  | st1-49 | 1 | 50% | 20% | >10 years | >10 years | 139,385 |
| 10 | st1-50 | 9 | 50% | 20% | 730       | 730       | 213,589 |
| 11 | st1-51 | 9 | 50% | 20% | 730       | 365       | 239,474 |
| 12 | st1-52 | 9 | 50% | 20% | 730       | 182       | 275,955 |
| 13 | st1-53 | 9 | 50% | 20% | 365       | 365       | 578,710 |
| 14 | st1-54 | 9 | 50% | 20% | 365       | 182       | 754,019 |
| 15 |        |   |     |     |           |           |         |

For peer review only

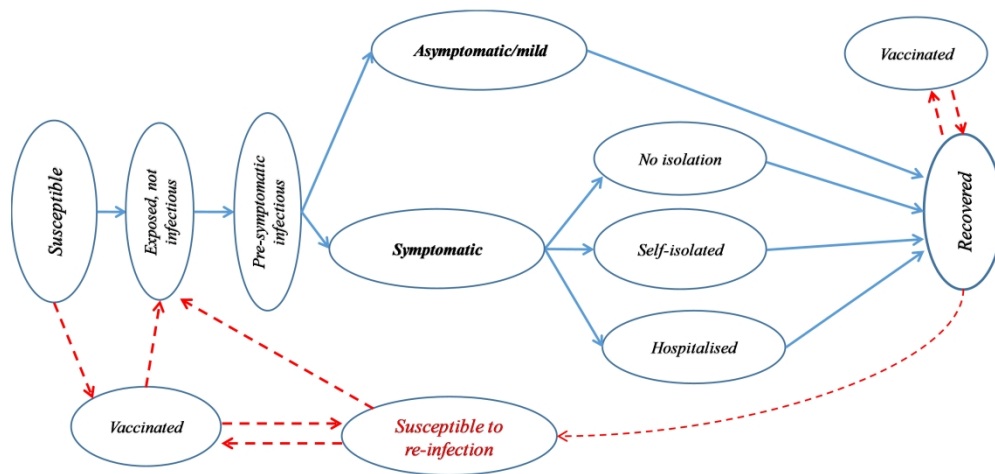

Figure 1: Modelling COVID-19 epidemics in England - main compartments and transitions across status

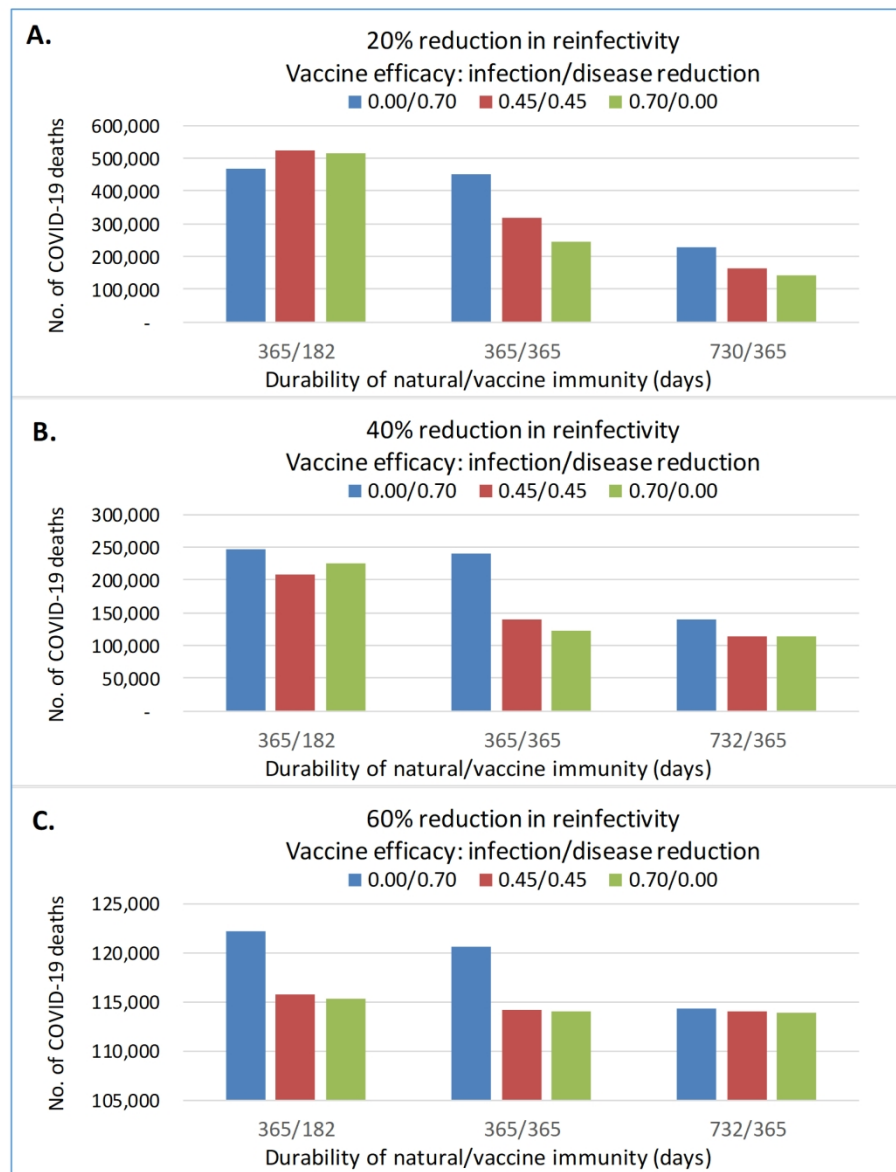

Figure 2: Projected numbers of COVID-19 deaths with different combinations of infection and disease protection vaccine efficacy, durability of immune response, and reduction in reinfectivity. The cumulative number of COVID-19 deaths in England by the end of 2029, after nine repeated annual vaccinations of 80% individuals aged  $\geq 16$  during 2021-2029. The overall vaccine efficacy was 70%; "0.00/0.70" refers to all vaccine efficacy attributable to disease protection, "0.45/0.45" refers to equal infection and disease protection, "0.70/0.00" refers to all efficacy attributable to infection protection. Duration of immunity: "365/182" refers to 365 days of natural immunity and 182 days vaccine immunity, "365/365" refers to 365 days natural and vaccine immunity, "730/365" refers to 730 and 365 days, respectively, natural and vaccine immunity. Figure 2A, 2B and 2C show results under the assumption of 20%, 40% and 60% reduction in reinfectivity.

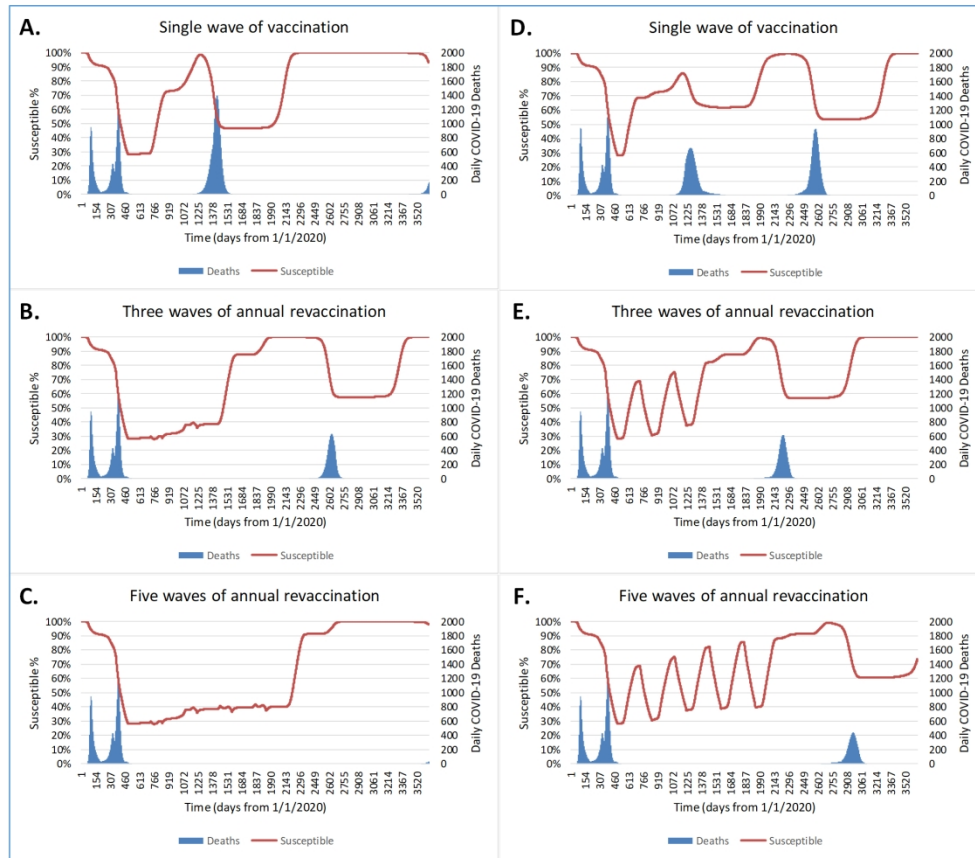

Figure 3 Projected peaks of daily COVID-19 deaths and the prevalence of susceptible individuals (%) during 2020-2029 under scenarios with different immunity durability and vaccine strategies. We assume 90% vaccine efficacy; 80% coverage of individuals aged  $\geq 16$ ; 40% reduction in reinfectivity and 730 days natural immunity for all scenarios in Figure 3. We assume 365 days (Figure 3A, 3B, 3C) or 182 days (Figure 3D, 3E, 3F) vaccine immunity, and single vaccination (Figure 3A, 3D), three annual vaccination (Figure 3B, 3E), or five annual vaccination programmes (Figure 3C, 3F).



**Supplementary Tables to:**

Vaccination against COVID-19 and society's return to normality in England: a modelling investigation of different types of naturally acquired and vaccine induced immunity

**Supplementary Table 1:**

Additional outcomes for scenarios in Figure 3. Estimated numbers of deaths from COVID-19

| Scenario | Vaccination: waves (interval) | Overall vaccine efficacy | Reduction in reinfectivity | Immunity duration (days) |         | COVID-19 deaths |           |           |                  |
|----------|-------------------------------|--------------------------|----------------------------|--------------------------|---------|-----------------|-----------|-----------|------------------|
|          |                               |                          |                            | Natural                  | Vaccine | 2020-2021       | 2022-2025 | 2026-2029 | Total: 2020-2029 |
| Fig.3A   | 1                             | 0.9                      | 0.6                        | 730                      | 365     | 112,878         | 140,312   | 4,871     | 258,061          |
| Fig.3B   | 3(365)                        | 0.9                      | 0.6                        | 730                      | 365     | 112,878         | -         | 60,448    | 173,326          |
| Fig.3C   | 5(365)                        | 0.9                      | 0.6                        | 730                      | 365     | 112,878         | -         | 752       | 113,630          |
| Fig.3D   | 1                             | 0.9                      | 0.6                        | 730                      | 182     | 112,878         | 95,441    | 98,177    | 306,496          |
| Fig.3E   | 3(365)                        | 0.9                      | 0.6                        | 730                      | 182     | 112,878         | 12,372    | 52,244    | 177,494          |
| Fig.3F   | 5(365)                        | 0.9                      | 0.6                        | 730                      | 182     | 112,878         | -         | 51,946    | 164,824          |

**Supplementary Table 2:**

The projected numbers of COVID-19 deaths under various simulation scenarios

| Scenario | Vaccination: waves (interval) | Overall vaccine efficacy | Reduction in reinfectivity | Immunity duration (days) |         | COVID-19 deaths |           |           |                  |
|----------|-------------------------------|--------------------------|----------------------------|--------------------------|---------|-----------------|-----------|-----------|------------------|
|          |                               |                          |                            | Natural                  | Vaccine | 2020-2021       | 2022-2025 | 2026-2029 | Total: 2020-2029 |
| st1-01   | 2(365)                        | 90%                      | 60%                        | 730                      | 730     | 112,815         | -         | -         | 112,815          |
| st1-02   | 2(365)                        | 90%                      | 60%                        | 730                      | 365     | 112,815         | -         | -         | 112,815          |
| st1-03   | 2(365)                        | 90%                      | 60%                        | 730                      | 182     | 112,815         | -         | -         | 112,815          |
| st1-04   | 3(365)                        | 90%                      | 60%                        | 365                      | 365     | 112,870         | -         | -         | 112,870          |
| st1-05   | 3(365)                        | 90%                      | 60%                        | 365                      | 182     | 112,870         | -         | -         | 112,870          |
| st1-06   | 5(365)                        | 90%                      | 40%                        | 730                      | 730     | 112,878         | -         | -         | 112,878          |
| st1-07   | 6(365)                        | 90%                      | 40%                        | 730                      | 365     | 112,878         | -         | -         | 112,878          |
| st1-08   | 9(365)                        | 90%                      | 40%                        | 730                      | 182     | 112,878         | -         | -         | 112,878          |
| st1-09   | 7(365)                        | 90%                      | 40%                        | 365                      | 365     | 112,986         | -         | -         | 112,986          |
| st1-10   | 9(365)                        | 90%                      | 40%                        | 365                      | 182     | 112,986         | -         | -         | 112,986          |
| st1-11   | 7(365)                        | 90%                      | 20%                        | 730                      | 730     | 112,942         | -         | -         | 112,942          |
| st1-12   | 9(365)                        | 90%                      | 20%                        | 730                      | 365     | 112,942         | -         | 1,409     | 114,351          |
| st1-13   | 9(365)                        | 90%                      | 20%                        | 730                      | 182     | 112,942         | 24,542    | -         | 137,484          |
| st1-14   | 9(365)                        | 90%                      | 20%                        | 365                      | 365     | 113,147         | 17,147    | 3,419     | 133,713          |
| st1-15   | 9(365)                        | 90%                      | 20%                        | 365                      | 182     | 113,616         | 75,130    | 48,955    | 237,701          |
| st1-16   | 2(365)                        | 70%                      | 60%                        | 730                      | 730     | 114,065         | -         | -         | 114,065          |
| st1-17   | 3(365)                        | 70%                      | 60%                        | 730                      | 365     | 114,065         | -         | -         | 114,065          |
| st1-18   | 3(365)                        | 70%                      | 60%                        | 730                      | 182     | 114,065         | -         | -         | 114,065          |
| st1-19   | 3(365)                        | 70%                      | 60%                        | 365                      | 365     | 114,223         | -         | -         | 114,223          |
| st1-20   | 3(365)                        | 70%                      | 60%                        | 365                      | 182     | 114,228         | 1,554     | -         | 115,782          |
| st1-21   | 6(365)                        | 70%                      | 40%                        | 730                      | 730     | 114,271         | -         | -         | 114,271          |
| st1-22   | 8(365)                        | 70%                      | 40%                        | 730                      | 365     | 114,271         | -         | -         | 114,271          |
| st1-23   | 9(365)                        | 70%                      | 40%                        | 730                      | 182     | 114,275         | 3,740     | 11,182    | 129,197          |
| st1-24   | 9(365)                        | 70%                      | 40%                        | 365                      | 365     | 114,814         | 24,220    | 30        | 139,064          |
| st1-25   | 9(365)                        | 70%                      | 40%                        | 365                      | 182     | 115,419         | 60,365    | 32,732    | 208,516          |
| st1-26   | 9(365)                        | 70%                      | 20%                        | 730                      | 730     | 114,594         | 4,879     | 8,845     | 128,318          |
| st1-27   | 9(365)                        | 70%                      | 20%                        | 730                      | 365     | 114,594         | 24,982    | 24,386    | 163,962          |
| st1-28   | 9(365)                        | 70%                      | 20%                        | 730                      | 182     | 115,076         | 55,193    | 29,983    | 200,252          |
| st1-29   | 9(365)                        | 70%                      | 20%                        | 365                      | 365     | 116,681         | 133,875   | 65,610    | 316,166          |
| st1-30   | 9(365)                        | 70%                      | 20%                        | 365                      | 182     | 119,965         | 280,585   | 123,846   | 524,396          |
| st1-31   | 3(365)                        | 50%                      | 60%                        | 730                      | 730     | 115,414         | -         | -         | 115,414          |
| st1-32   | 3(365)                        | 50%                      | 60%                        | 730                      | 365     | 115,414         | -         | -         | 115,414          |
| st1-33   | 3(365)                        | 50%                      | 60%                        | 730                      | 182     | 115,419         | -         | -         | 115,419          |
| st1-34   | 9(365)                        | 50%                      | 60%                        | 365                      | 365     | 115,723         | 1,440     | -         | 117,163          |
| st1-35   | 9(365)                        | 50%                      | 60%                        | 365                      | 182     | 115,836         | 9,564     | -         | 125,400          |
| st1-36   | 9(365)                        | 50%                      | 40%                        | 730                      | 730     | 115,965         | 435       | 293       | 116,693          |
| st1-37   | 9(365)                        | 50%                      | 40%                        | 730                      | 365     | 115,965         | 1,500     | 17,798    | 135,263          |
| st1-38   | 9(365)                        | 50%                      | 40%                        | 730                      | 182     | 116,276         | 31,849    | 17,791    | 165,916          |
| st1-39   | 9(365)                        | 50%                      | 40%                        | 365                      | 365     | 117,753         | 83,968    | 34,605    | 236,326          |
| st1-40   | 9(365)                        | 50%                      | 40%                        | 365                      | 182     | 118,845         | 118,689   | 79,225    | 316,759          |
| st1-41   | 9(365)                        | 50%                      | 20%                        | 730                      | 730     | 117,545         | 56,380    | 39,664    | 213,589          |
| st1-42   | 9(365)                        | 50%                      | 20%                        | 730                      | 365     | 117,545         | 66,524    | 55,405    | 239,474          |
| st1-43   | 9(365)                        | 50%                      | 20%                        | 730                      | 182     | 118,740         | 153,640   | 3,575     | 275,955          |
| st1-44   | 9(365)                        | 50%                      | 20%                        | 365                      | 365     | 126,982         | 267,930   | 183,798   | 578,710          |
| st1-45   | 9(365)                        | 50%                      | 20%                        | 365                      | 182     | 137,272         | 396,172   | 220,575   | 754,019          |

Notes to supplementary Table 2.

1. Assumptions: vaccine efficacy equally attributable to infection and disease protection; mass vaccination with 80% coverage of individuals aged 16+.

2. Vaccination waves (interval): number of waves and days between the starting dates of the two adjacent waves. This appendix table shows results of repeated annual mass vaccination programmes. There are maximally nine waves of annual mass vaccination programmes during 2021-2029. Under some scenarios, COVID-19 outbreaks before the end of 2029 can be prevented with 2-7 waves of annual vaccination programmes.

**Supplementary Table 3:**  
Results of sensitivity analyses. Estimated numbers of deaths from COVID-19

| Scenario                                                           | Vaccination: waves (interval) | Overall vaccine efficacy | Reduction in reinfectivity | Immunity duration (days) |         | COVID-19 deaths |           |           |                  |
|--------------------------------------------------------------------|-------------------------------|--------------------------|----------------------------|--------------------------|---------|-----------------|-----------|-----------|------------------|
|                                                                    |                               |                          |                            | Natural                  | Vaccine | 2020-2021       | 2022-2025 | 2026-2029 | Total: 2020-2029 |
| <b>Different frequency and days between vaccination programmes</b> |                               |                          |                            |                          |         |                 |           |           |                  |
| L92c1                                                              | 2(730)                        | 0.9                      | 60%                        | 730                      | 730     | 112,815         | -         | -         | 112,815          |
| Lm92c1                                                             | 2(730)                        | 0.9                      | 60%                        | 730                      | 365     | 112,815         | -         | -         | 112,815          |
| L94c2                                                              | 4(730)                        | 0.9                      | 40%                        | 730                      | 730     | 112,878         | -         | -         | 112,878          |
| Ls916s3                                                            | 16(182)                       | 0.9                      | 40%                        | 730                      | 182     | 112,942         | -         | -         | 112,942          |
| Ms93s1                                                             | 3(182)                        | 0.9                      | 60%                        | 365                      | 182     | 112,870         | -         | -         | 112,870          |
| Ms913s2                                                            | 13(182)                       | 0.9                      | 40%                        | 365                      | 182     | 112,878         | -         | -         | 112,878          |
| M916s3                                                             | 16(182)                       | 0.9                      | 20%                        | 365                      | 365     | 113,145         | -         | -         | 113,145          |
| Ms918s3                                                            | 18(182)                       | 0.9                      | 20%                        | 365                      | 182     | 113,153         | 5,724     | 4,569     | 123,446          |
| L73c1                                                              | 3(730)                        | 0.7                      | 60%                        | 730                      | 730     | 114,065         | -         | -         | 114,065          |
| Lm73c1                                                             | 3(730)                        | 0.7                      | 60%                        | 730                      | 365     | 114,065         | -         | -         | 114,065          |
| Ls710s2                                                            | 10(182)                       | 0.7                      | 40%                        | 730                      | 182     | 114,275         | -         | -         | 114,275          |
| L718s3                                                             | 18(182)                       | 0.7                      | 20%                        | 730                      | 730     | 114,576         | -         | -         | 114,576          |
| Ls718s3                                                            | 18(182)                       | 0.7                      | 20%                        | 730                      | 182     | 114,600         | -         | 13,802    | 128,402          |
| Lm718s3                                                            | 18(182)                       | 0.7                      | 20%                        | 730                      | 365     | 114,576         | -         | -         | 114,576          |
| Ms73s1                                                             | 3(182)                        | 0.7                      | 60%                        | 365                      | 182     | 114,228         | -         | -         | 114,228          |
| M718s2                                                             | 18(182)                       | 0.7                      | 40%                        | 365                      | 365     | 114,642         | -         | -         | 114,642          |
| Ms718s2                                                            | 18(182)                       | 0.7                      | 40%                        | 365                      | 182     | 114,674         | 650       | 5,067     | 120,391          |
| M718s3                                                             | 18(182)                       | 0.7                      | 20%                        | 365                      | 365     | 115,808         | 24,794    | 19,794    | 160,396          |
| Ms718s3                                                            | 18(182)                       | 0.7                      | 20%                        | 365                      | 182     | 116,168         | 64,685    | 47,241    | 228,094          |
| <b>No reduction in reinfectivity after immunity waning</b>         |                               |                          |                            |                          |         |                 |           |           |                  |
| L99m0                                                              | 9(365)                        | 0.9                      | 0%                         | 730                      | 730     | 113,012         | -         | 1,255     | 114,267          |
| Lm99m0                                                             | 9(365)                        | 0.9                      | 0%                         | 730                      | 365     | 113,012         | 17,702    | 7,512     | 138,226          |
| Ls99m0                                                             | 9(365)                        | 0.9                      | 0%                         | 730                      | 182     | 113,070         | 30,619    | 47,229    | 190,918          |
| M99m0                                                              | 9(365)                        | 0.9                      | 0%                         | 365                      | 365     | 113,684         | 52,806    | 35,665    | 202,155          |
| Ms99m0                                                             | 9(365)                        | 0.9                      | 0%                         | 365                      | 182     | 115,880         | 261,365   | 29,700    | 406,945          |
| L79m0                                                              | 9(365)                        | 0.7                      | 0%                         | 730                      | 730     | 115,522         | 49,095    | 28,213    | 192,830          |
| Lm79m0                                                             | 9(365)                        | 0.7                      | 0%                         | 730                      | 365     | 115,522         | 51,428    | 56,044    | 222,994          |
| Ls79m0                                                             | 9(365)                        | 0.7                      | 0%                         | 730                      | 182     | 117,170         | 167,268   | 499       | 284,937          |
| M79m0                                                              | 9(365)                        | 0.7                      | 0%                         | 365                      | 365     | 123,398         | 250,649   | 159,941   | 533,988          |
| Ms79m0                                                             | 9(365)                        | 0.7                      | 0%                         | 365                      | 182     | 143,421         | 381,311   | 350,640   | 875,372          |

1  
2 **Supplementary files to:**  
3

4  
5 **Vaccination against COVID-19 and society's return to normality in England: a modelling**  
6 **investigation of different types of naturally acquired and vaccine induced immunity**  
7

- 8  
9  
10  
11  
12 **1. Model structure and status**  
13  
14 **2. Data sources and model verification**  
15  
16 **3. Projection scenarios**  
17  
18 **4. Mathematical equations**  
19  
20 **5. References**  
21  
22  
23  
24  
25  
26  
27  
28  
29  
30  
31  
32  
33  
34  
35  
36  
37  
38  
39  
40  
41  
42  
43  
44  
45  
46  
47  
48  
49  
50  
51  
52  
53  
54  
55  
56  
57  
58  
59  
60

# 1. Model structure and status

This is a discrete-time population dynamic simulation model. Population in England are partitioned into discrete categories by sex (male or female), age (0-4, 5-9, then by 10 year age bands, and 80+), and Covid-19 infection categories. The main infection categories include: susceptible (SU), exposed (EX), infected (IN), and recovered (RE) (appendix figure 1). The infected individuals are further categorised as asymptomatic, symptomatic, self-isolated, and hospitalised.

**Appendix figure 1: Model structure and transmission across status**

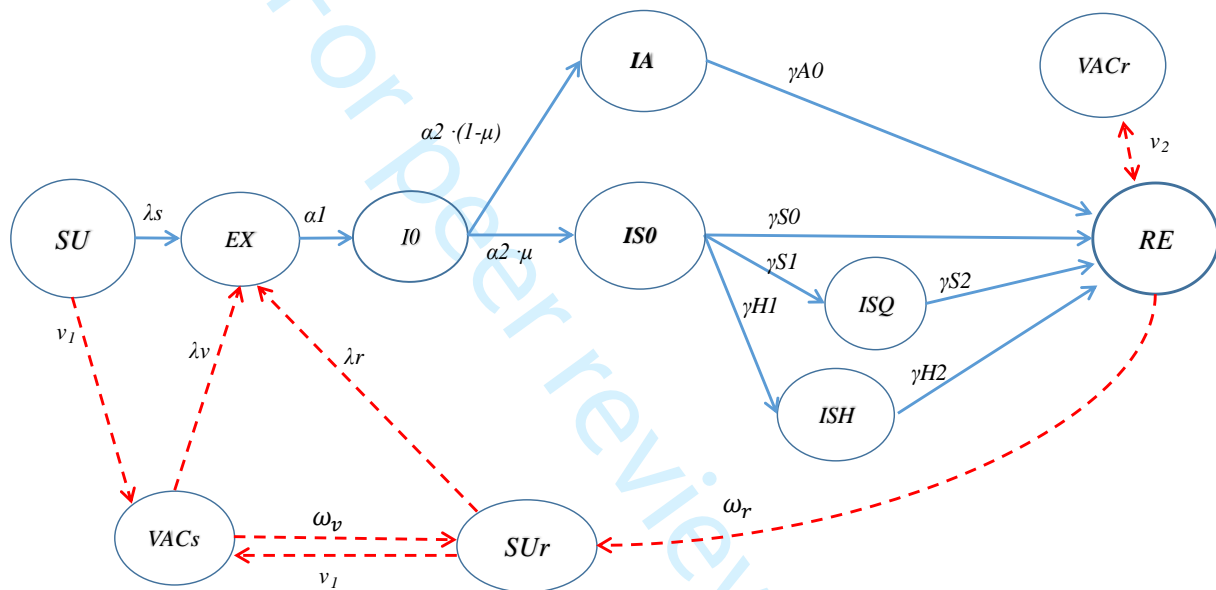

## Definitions of compartmental variables in appendix figure 1

- SU: susceptible individuals
- SUr: Individuals susceptible to reinfection after immunity waning
- EX: exposed individuals, not infectious
- IO: infectious, before symptom onset
- IA: infectious individuals with no or very mild symptoms
- ISO: symptomatic patients who are not quarantined
- ISQ: symptomatic patients self-isolated
- ISH: symptomatic patients who are hospitalised
- RE: recovered from covid-19 infection
- VACs: vaccinated susceptible individuals
- VACr: vaccinated individuals who recovered from infection

### Transition parameters in appendix figure 1:

- $\lambda_s$ : Force of infection ( $\lambda$ ) measures the risk (probability) of infection transmission, which is a function of transmission rate ( $\beta$ ) and the prevalence of infectious individuals ( $I$ ) among the population ( $N$ ):  $\lambda = \beta \cdot I/N$ .<sup>1</sup>
- $\beta$ : The transmission rate  $\beta$  in this discrete-time model is defined as the average number of individuals infected daily by an infectious person. It is a function of the number of daily close contacts per person ( $c$ ), and the transmission risk per contact between a susceptible and an infectious individual ( $\eta$ ): i.e.,  $\beta = c \cdot \eta$ .<sup>2</sup>
- $\alpha_1$ : rate of progressing from being exposed to being infectious.
- $\alpha_2$ : rate of progressing from being asymptomatic infectious to symptomatic.
- $\mu$ : proportion of infected individuals who will be symptomatic; age-specific
- $infA$ : The fraction of infection force for infected individuals with no or mild symptoms. It was assumed that  $infA=0.5$  in this study.
- $fS_0$ : fraction of symptomatic patients who will not be quarantined.
- $fS_q$ : fraction of symptomatic patients who will be quarantined (self-isolation).
- $fS_h$ : fraction of symptomatic patients who will be hospitalised (including ICU admission).
- $\gamma_{A0}$ : rate of recovering for asymptomatic individuals
- $\gamma_{S0}$ : rate of recovering for symptomatic, not isolated/hospitalised patients
- $\gamma_{S1}$ : rate of being isolated in symptomatic patients
- $\gamma_{S2}$ : rate of recovering in isolated patients
- $\gamma_{H1}$ : rate of being hospitalised for symptomatic patients
- $\gamma_{H2}$ : rate of recovering in hospitalised patients
- $v_1$ : rate of vaccinating susceptible individuals
- $v_2$ : rate of vaccinating recovered individuals
- $w_v$ : rate of immunity waning in vaccinated individuals
- $w_r$ : rate of immunity waning in recovered individuals

All individuals in England are assumed to be susceptible to SARS-CoV-2 infection at the beginning of 2020. Susceptible individuals may be infected by contacting infectious individuals, and the infection status is changed from “susceptible” (SU) to “exposed” (EX). The exposed individuals are not infectious during the early incubation period, but start to be infectious before the onset of symptoms. Individuals infected with SARS-CoV-2 virus may have no or very mild symptoms (IA), and palpable symptoms (symptomatic or clinical infections). Asymptomatic individuals can spread SARS-CoV-2 virus before recovery, although the transmission risk may be lower than symptomatic patients. Symptomatic patients are further classified into three categories: symptomatic patients who are neither isolated nor hospitalised (IS<sub>0</sub>), those who self-isolate at home (IS<sub>q</sub>), and those who are hospitalised (including those being admitted to intensive care units) (IS<sub>h</sub>). Symptomatic patients are infectious and can transmit the

1 virus to susceptible people before being isolated, hospitalised or recovered. We assume that hospitalised  
 2 patients (ISH) are well isolated and no longer able to spread the virus to the susceptible population,  
 3 although infectious patients who are self-isolated at home (ISQ) may transmit virus to household  
 4 contacts.  
 5  
 6  
 7

8  
 9 Individuals may recover from previous infection of SARS-CoV-2 (RE), and the susceptible and  
 10 recovered individuals may be vaccinated with vaccines again SARS-CoV-2 virus (VAC1 and VAC2).  
 11  
 12 Individuals recovered or effectively vaccinated may develop immune responses against infection with  
 13 SARS-CoV-2. However, if the protective immunity is not long lasting, individuals who have recovered  
 14 or vaccinated may become susceptible again after the waning of the immunity (SUR).  
 15  
 16

17  
 18 The immune response against COVID-19, either by naturally acquired from past SARS-CoV-2  
 19 infection or vaccine-induced, may be long lasting or short-lived. Immune response may reduce  
 20 susceptibility of individuals to infection (infection protection, or sterilising, immunity), reduce disease  
 21 severity after being infected (disease reduction immunity), and reduce infectivity of those who are  
 22 reinfected after recovery or being vaccinated (re-infectivity reduction immunity).<sup>3</sup> According to existing  
 23 evidence on immunological characteristics for other human coronaviruses, immunity against reinfection  
 24 (sterilising immunity) may be waning in several months, while disease and re-infectivity reduction  
 25 responses are likely long lasting.<sup>3</sup> According to these basic concepts specified by Lavine et al,<sup>3</sup> we  
 26 incorporate the three types of immune responses into the model, to explicitly evaluate their impacts on  
 27 future transmission dynamics (appendix figure 2).  
 28  
 29  
 30  
 31  
 32  
 33  
 34

35 **Appendix figure 2: Types of immune responses by natural infection or vaccination**

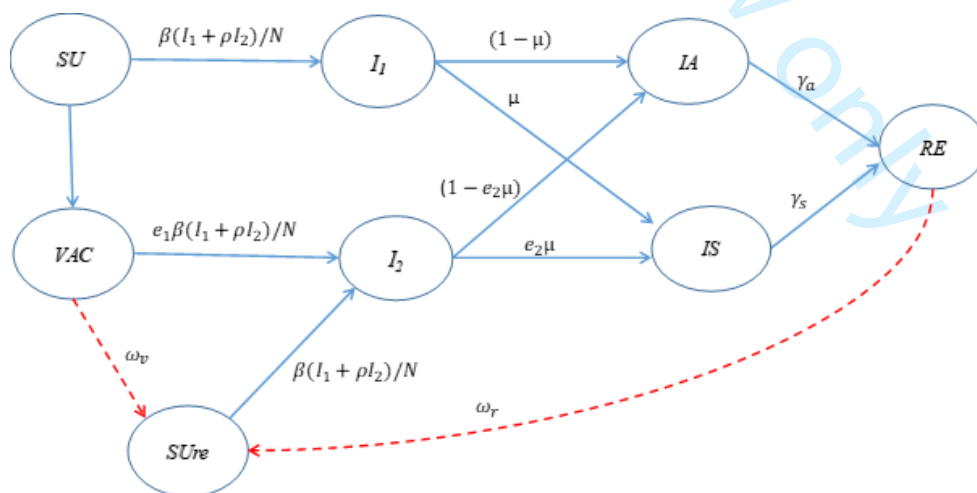

36  
 37  
 38  
 39  
 40  
 41  
 42  
 43  
 44  
 45  
 46  
 47  
 48  
 49  
 50  
 51  
 52  
 53  
 54  
 55  
 56 **Notes to appendix figure 2:**  
 57  
 58  
 59  
 60

- Appendix figure 2 is a simplified version of appendix figure 1, not showing isolation and hospitalisation for symptomatic patients.
- $N$ : The number of the population
- $\beta$ : The transmission rate, i.e., the average number of individuals infected daily by an infectious person. It is a function of the number of daily close contacts per person ( $c$ ), and the transmission risk per contact between a susceptible and an infectious individual ( $\eta$ ): i.e.,  $\beta=c\cdot\eta$ .
- $I_1$ : Infectious individuals with primary infection
- $I_2$ : Infectious individuals with secondary infection (infected after being vaccinated or recovered)
- $\rho$ : Relative infectivity of the secondary infection ( $I_2$ ) compared with the primary infection ( $I_1$ ). For example, if  $\rho=0.6$ , the infectivity of  $I_2$  is 40% lower than the infectivity of  $I_1$
- $\mu$ : proportion of infected individuals who will be symptomatic; age-specific
- $e_1$ : Relative efficacy of vaccine for sterilising immunity, reducing risk of virus transmission
- $e_2$ : Relative efficacy of vaccine for pathology reduction, reducing the proportion of symptomatic cases after being infected
- $IA$ : Asymptomatic individuals
- $IS$ : Symptomatic patients
- $\gamma_a$ : Average rate of recovering of asymptomatic individuals
- $\gamma_s$ : Average rate of recovering of symptomatic individuals
- $w_v$ : rate of immunity waning in vaccinated individuals
- $w_r$ : rate of immunity waning in recovered individuals

### Overall and partial vaccine efficacy

Results of randomised controlled trials shown that vaccines may be >90% efficacious (e.g., Pfizer mRNA vaccine) in reducing severe symptomatic diseases, compared with the placebo group.<sup>4</sup> In appendix figure 2,  $e_1$  and  $e_2$  are parameters of vaccine's efficacy in blocking virus transmission and reducing symptomatic cases in the infected, respectively. The reduction in symptomatic cases in the vaccine group may be due to the prevention of infection in susceptible individuals (related to  $e_1$ ), or a lower proportion of infected individuals being symptomatic in the vaccine group (related to  $e_2$ ), or due to a combination of both. Let  $\lambda$  is the transmission risk and  $\mu$  is the proportion of symptomatic cases in the infected without vaccination. After being vaccinated, the transmission risk is reduced to  $\lambda\cdot e_1$ , and the proportion of symptomatic cases reduced to  $\mu\cdot e_2$ . For a vaccine with 90% efficacy in reducing the number of symptomatic cases (compared with the control group), it should be true that  $e_1\cdot e_2=(1-0.90)$ , or  $e_1=0.10/e_2$ . There are many different possible combinations of  $e_1$  and  $e_2$  for a given overall efficacy in reducing symptomatic cases. For example,  $e_1=e_2=\text{SQRT}(0.30)=0.548$  corresponds to a 70% efficacy of vaccine with equal sterilising immunity and pathology reduction. If  $e_1=1$  (i.e., zero efficacy in sterilising immunity), all vaccine efficacy will be attributable to the pathology reduction, with  $e_2=0.30$ , for a vaccine with 70% efficacy. The partial efficacy is calculated using:  $E_i = 1 - (1 - E_o)/E_d$ , where  $E_i$  is the partial efficacy for infection protection,  $E_d$  is the partial efficacy for disease reduction, and  $E_o$

1  
2 is the overall vaccine efficacy. The equal partial efficacy is calculated by:  $E_i = E_d = 1 - \sqrt{(1 - E_o)}$ . For  
3 vaccines with 90%, 70% and 50% overall efficacy, the equal partial efficacy for the infection protection  
4 and disease reduction is 69.4%, 45.2%, and 29.3%, respectively.  
5  
6  
7  
8  
9  
10

## 11 2. Parameterisation, data sources, and simulation scenarios

### 12 2.1 Transition parameters and distribution of infectious period

13  
14 In appendix figure 1, force of infection ( $\lambda$ ) measures the risk of infection,<sup>1</sup> which is a function of  
15 transmission rate ( $\eta$ ) and the prevalence of existing infectious individuals ( $I$ ) among the population ( $N$ ):  
16  $\lambda = \eta \cdot I/N$ . The transmission rate  $\eta$  in the discrete-time model can be defined as the average number of  
17 new infected individuals generated daily by an infected person. That is,  $\eta = Rt/T$ , in which  $Rt$  is effective  
18 reproduction number and  $T$  is the average infectious period for infected individuals. We calculated  $\eta$  as  
19 a function of the number of daily contacts per person ( $c$ ), and the risk of transmission per contact between  
20 a susceptible and an infected individual ( $\beta$ ):  $\eta = c \cdot \beta$ .<sup>2</sup>  
21  
22  
23  
24  
25  
26  
27  
28

29 The transition rate between model's compartments in infectious models is often assumed to be constant,  
30 calculated by  $1/x$ , in which "x" is the average period that subjects remain before the transition to the  
31 model's next compartments.<sup>1</sup> Therefore, the infectious period in standard SIR or SEIR models is usually  
32 assumed to be exponentially distributed, with some limitations of the use of exponentially distributed  
33 infectious period.<sup>5 6</sup> In this study, we assumed that the transition probability between model's  
34 compartments are based on gamma distributed period that individuals remain in a compartment.<sup>7</sup> The  
35 transition probability ( $y$ ) at  $t$  is:  $y_t = (cg_t - cg_{t-1}) / (1 - cg_t)$ , where  $cg_t$  is the gamma cumulative  
36 probability by the end of  $t$ . Given mean and shape ( $k$ ) parameters, the gamma distribution based  
37 transition probability is used as a deterministic value to estimate the number of individuals moving  
38 between two status in this study.  
39  
40  
41  
42  
43  
44  
45

### 46 2.2 Parameterisation and data sources

47  
48 We estimated initial parameters based on relevant literature and data from the UK government websites  
49 (appendix table 1). Key parameters were calibrated according to the reported numbers of covid-19  
50 deaths, hospitalised patients, and the prevalence of infected individuals in England from January 2020  
51 to January 2021.<sup>8</sup>  
52  
53  
54  
55  
56  
57  
58  
59  
60



Appendix table 1: Summary of key model parameters

| Parameter                                                                     | Value                                             |                       |                       | Source                                                                                    |
|-------------------------------------------------------------------------------|---------------------------------------------------|-----------------------|-----------------------|-------------------------------------------------------------------------------------------|
| <b>Proportion of asymptomatic cases in infected individuals (%)</b>           |                                                   |                       |                       |                                                                                           |
| Age: 0-9                                                                      | 0.71                                              |                       |                       | Davis et al. <sup>9</sup>                                                                 |
| 10-19                                                                         | 0.79                                              |                       |                       |                                                                                           |
| 20-29                                                                         | 0.73                                              |                       |                       |                                                                                           |
| 30-39                                                                         | 0.67                                              |                       |                       |                                                                                           |
| 40-49                                                                         | 0.60                                              |                       |                       |                                                                                           |
| 50-59                                                                         | 0.51                                              |                       |                       |                                                                                           |
| 60-69                                                                         | 0.37                                              |                       |                       |                                                                                           |
| 70+                                                                           | 0.31                                              |                       |                       |                                                                                           |
| <b>Proportion of self-isolated symptomatic cases who are not hospitalised</b> |                                                   |                       |                       |                                                                                           |
| <b>Age:</b>                                                                   | <b>0-49</b>                                       | <b>50-69</b>          | <b>70+</b>            | Assumed by authors, and calibrated according to reported COVID-19 deaths.                 |
| Before 13/03/2021                                                             | 0.10                                              | 0.10                  | 0.10                  |                                                                                           |
| 13/03-23/03/2020                                                              | 0.40                                              | 0.60                  | 0.80                  |                                                                                           |
| After 24/03/2020                                                              | 0.80-0.90                                         | 0.80-0.95             | 0.90-0.95             |                                                                                           |
| <b>Estimated values of gamma distributed parameters (mean, shape k)</b>       |                                                   |                       |                       |                                                                                           |
|                                                                               | <b>Before 12/03/20</b>                            | <b>13/03-23/03/20</b> | <b>After 23/03/20</b> |                                                                                           |
| Duration from exposed to preclinical infectious (day)                         | 4.0 (4)                                           | 4.0 (4)               | 4.0 (4)               | Zhang et al. <sup>10</sup><br>Davies et al. <sup>7</sup><br>Ferguson et al. <sup>11</sup> |
| Duration of preclinical infectious (day)                                      | 1.5 (2)                                           | 1.5 (2)               | 1.5 (2)               |                                                                                           |
| Infectious period before recovery (day)                                       | 5.0 (5)                                           | 5.0 (5)               | 5.0 (5)               |                                                                                           |
| Infectious period before being isolated (day)                                 | 4.0 (4)                                           | 3.0 (3)               | 2.0 (2)               |                                                                                           |
| Infectious period during isolation at home (day)                              | 2.0 (2)                                           | 3.0 (3)               | 4.0 (4)               |                                                                                           |
| Infectious period before being hospitalised (day)                             | 4.0 (4)                                           | 3.0 (3)               | 2.0 (2)               |                                                                                           |
| Duration of hospitalisation (day)                                             | 10.0 (10)                                         | 10.0 (10)             | 10.0 (10)             |                                                                                           |
| Delay from being infected to deaths from Covid-19 (day)                       | 23.0 (23)                                         | 23.0 (23)             | 23.0 (23)             | Verity et al. <sup>12</sup>                                                               |
| <b>Case fatality rates (%)</b>                                                |                                                   |                       |                       |                                                                                           |
| Age: 0-9                                                                      | 0.0026                                            |                       |                       | Verity et al. <sup>12</sup> ;<br>Chinese CDC <sup>13</sup>                                |
| 10-19                                                                         | 0.0148                                            |                       |                       |                                                                                           |
| 20-29                                                                         | 0.0600                                            |                       |                       |                                                                                           |
| 30-39                                                                         | 0.1460                                            |                       |                       |                                                                                           |
| 40-49                                                                         | 0.2950                                            |                       |                       |                                                                                           |
| 50-59                                                                         | 1.2500                                            |                       |                       |                                                                                           |
| 60-69                                                                         | 3.9900                                            |                       |                       |                                                                                           |
| 70-79                                                                         | 8.6100                                            |                       |                       |                                                                                           |
| 80+                                                                           | 13.400                                            |                       |                       |                                                                                           |
| <b>Transmission risk by asymptomatic individuals</b>                          | 50% of the transmission risk by symptomatic cases |                       |                       | Ferguson et al. <sup>11</sup> .                                                           |
| <b>Age specific rates of hospitalisation among infected individuals</b>       |                                                   |                       |                       |                                                                                           |
| 0-9                                                                           | 0.010%                                            |                       |                       | Verity et al. <sup>12</sup>                                                               |
| 10-19                                                                         | 0.041%                                            |                       |                       |                                                                                           |

|       |       |  |
|-------|-------|--|
| 20-29 | 1.04% |  |
| 30-39 | 3.43% |  |
| 40-49 | 4.25% |  |
| 50-59 | 8.16% |  |
| 60-69 | 11.8% |  |
| 70-79 | 16.6% |  |
| 80+   | 18.4% |  |
|       |       |  |

We obtained population statistics in England (estimates of mid-year 2020) from Office for National Statistics. It was assumed that all individuals in England were susceptible to SARS-CoV-2 infection at the beginning of 2020. By contacting with infectious individuals, susceptible individuals may be infected, and their infection category is changed from “susceptible” (SU) to “exposed” (EX). “Exposed” refers to the pre-infectious status of infected individuals. According to data from previous studies, the period of incubation before symptom onset was on average 5.5 days,<sup>10</sup> and the exposed individuals start to be infectious about 1.5 days before the onset of symptoms.<sup>7 11</sup> Therefore, we assumed a gamma distribution of incubation period, with a mean non-infectious period of 4 days ( $k=4.0$ ) after being exposed, and a mean infectious period of 1.5 days ( $k=2$ ) before symptom onset.

Individuals infected with SARS-CoV-2 virus may have no or very mild symptoms (asymptomatic infected), and palpable symptoms (symptomatic patients). As in previous modelling studies<sup>7 11</sup>, it was assumed that asymptomatic individuals can spread SARS-CoV-2 virus before recovery, although the infectious risk was assumed to be half of symptomatic patients.<sup>11</sup> We used age-specific rates of asymptomatic cases in the infected individuals, reported in a study based on data from 6 countries<sup>9</sup> (appendix table 1).

Symptomatic patients are further classified into three categories: symptomatic patients who are neither isolated nor hospitalised (mainly at the initial phase of the epidemic), those who are self-isolated at home, those who are hospitalised (see appendix figure 1). We assume that asymptomatic individuals were not isolated, although the average number of daily contacts could be reduced by non-pharmaceutical interventions (NPIs), including social distancing, testing, contact tracing, and lockdown. Assumed proportions of self-isolation of symptomatic cases who are not hospitalised, depending on age and NPI measures are shown in appendix table 1.

We assume that only symptomatic patients are hospitalised, and age specific rates of hospitalisation among symptomatic individuals were from Verity et al.<sup>12</sup> The hospitalisation rates were calibrated according to reported numbers of hospitalised patients with covid-19 in England.<sup>14</sup> Based on the reported number of hospitalised patients and estimated number of symptomatic cases, the hospitalisation rate was estimated to be 70% lower than the estimated by Verity et al.<sup>12</sup> Symptomatic patients are infectious and can transmit the virus to susceptible people before being hospitalised or isolated. We assume that

1 hospitalised patients are no longer able to spread the virus to susceptible individuals in the community.  
2  
3 However, infected individuals who are self-isolated at home may transmit virus to household contacts.  
4  
5 The infectious period before recovery was assumed to be gamma distributed, with a mean value of 5  
6  
7 days. Before implementing any NPIs, the infectious period of symptomatic cases was of a mean value  
8  
9 of 4 days ( $k=4$ ) before being quarantined or hospitalised. After implementing NPI measures, the  
10  
11 infectious period for isolated and hospitalised patients was reduced, having a mean value of 2 days ( $k=2$ ).  
12  
13 The mean hospital stay was assumed to be 10 days ( $k=10$ ) (including ICU admitted patients) (appendix  
14  
15 table 1). Verity et al estimated that the average duration from symptom onset to death was 17.8 days.<sup>12</sup>  
16  
17 Therefore, we assume that covid-19 related deaths occur on average 23 days ( $k=23$ ) after being  
18  
19 exposed/infected.

20  
21 The simulation starts from 1 January 2020, over a period of 10 years until the end of 2029. We assume  
22  
23 that the first exposed case was imported to England on January 15th 2020, and the daily number of  
24  
25 infectious cases imported was increased by one until 9 February 2020, with a total number of 351 cases  
26  
27 imported in 25 days. The sex-and-age-specific numbers of household and community daily contacts per  
28  
29 person in the UK were obtained from a study in 8 European countries.<sup>15 16</sup> For the purpose of simplicity,  
30  
31 we considered only household contacts (relevant to self-isolation at home) and general daily contacts  
32  
33 (for all types of contacts). The risk of positive transmission per contact between susceptible and  
34  
35 infectious individuals ( $\beta$ ) was estimated by calibrating estimated and reported numbers of covid-19  
36  
37 deaths in England, household and general daily contacts per person, and other model parameters. The  
38  
39 transmission risk by asymptomatic individuals was assumed to be 50% by symptomatic patients.<sup>11</sup>

40  
41 In this study, all COVID-19 related deaths are assumed to be from symptomatic cases, and age specific  
42  
43 case fatality rates were based on a study by Verity et al.<sup>12</sup> We assume that individuals infected with  
44  
45 Covid-19 will not die from other causes before recovery. Average sex and age specific rates of all-cause  
46  
47 deaths in England during 2015-2019<sup>17</sup> were applied to people who are not infected with or recovered  
48  
49 from covid-19. For simplicity and maintaining a stable population, we assumed that the number of births  
50  
51 at day  $t$  equals to the number of all deaths at day  $t-1$ . Furthermore, for simplicity, we did not consider  
52  
53 the influence of migration on the population. We adjusted the number of individuals belong to an age  
54  
55 group (all  $<80+$ ) at the beginning of the year since 2021 by shifting 20% (for age group 0-4 and 5-9) or  
56  
57 10% (for age group 10-19, ... 70-79) of them to the adjacent higher age group.

## 58 **NPI and seasonal impacts on transmission parameters**

59  
60 Since March 2020, NPI measures were recommended and gradually tightened in England, including  
hand washing, mouth covering when coughing in public places, home isolation of individuals with  
COVID-19 like symptoms, shielding of vulnerable individuals, avoiding non-essential contacts, and  
maintaining social distancing. These measures reduced contacts and transmission risk, and shortened

the period of transmission by symptomatic individuals. We assumed that the general population's contact rates were reduced by 10% to 40%, depending on age and co-morbidity (appendix table 2). Based on the reported number of COVID-19 deaths, we estimate that the transmission risk per contact between infectious and susceptible individuals was reduced by 32%, from  $\beta=0.068$  before the implementation of any NPIs to 0.046 by 15 March 2020. The UK government put lockdown measures in place from 24 March 2020, including working from home if possible, closure of schools and non-essential shops, pubs and restaurants, avoiding non-essential travelling, and cancelling gathering activities. We assume that numbers of general population contacts were reduced by 60-85%. We assume that the household contacts were not influenced by the NPI measures.

**Appendix table 2: Assumed impacts of NPIs on general contacts in England.** Notes: Values are scaling fractions to reduce the normal contacts. For example, a fraction of 0.80 means the contacts are reduced by 20%.

| Time             | Age group |       |       |      |
|------------------|-----------|-------|-------|------|
|                  | 0-19      | 20-59 | 60-69 | 70+  |
| Before 13/3/2020 | 1.00      | 1.00  | 1.00  | 1.00 |
| 13/03/2020-      | 0.90      | 0.80  | 0.70  | 0.60 |
| 17/03/2020-      | 0.80      | 0.70  | 0.60  | 0.50 |
| 24/03/2020-      | 0.40      | 0.30  | 0.20  | 0.15 |
| 05/07/2020-      | 0.60      | 0.55  | 0.40  | 0.20 |
| 01/09/2020-      | 0.80      | 0.60  | 0.50  | 0.30 |
| 05/11/2020-      | 0.60      | 0.30  | 0.20  | 0.15 |
| 02/12/2020-      | 0.70      | 0.60  | 0.50  | 0.30 |
| 05/01/2021-      | 0.40      | 0.30  | 0.20  | 0.15 |
| 08/03/2021-      | 0.80      | 0.60  | 0.50  | 0.30 |
| 01/06/2021-      | 1.00      | 1.00  | 1.00  | 1.00 |

The lockdown measures in England started to be relaxed from 13 May 2020 by allowing partial returning to work. Further relaxing of control measures followed, including reopening of some shops and allowing outdoor meetings up to six people from 1 June, re-opening of more non-essential shops from 5 June, and further relaxing of restrictions (such as re-opening of pubs and restaurants) from 5 July 2020. However, social distancing measures was maintained and face covering was required where social distancing could not be implemented. From 1 September 2020, schools in England were re-opening. Consequently, the transmission risk per contact between susceptible and infectious individuals was increased to 0.052 since September. The impacts of these changes in NPIs were reflected in the assumed social contacts and transmission risk. Because of the new virus variant in the UK,<sup>18</sup> the average transmission risk per contact was increased to  $\beta=0.052$  by November 2020, and  $\beta=0.056$  by the end of 2020.

To incorporate the impact of seasonality on future projections since 2021, we assumed that the transmission risk from April to September is 20% lower than that from October to February, according to observed changes in transmission dynamics during March 2020 to January 2021 in England.

## Model validation

We used the developed model and initially estimated parameters to simulate the covid-19 epidemic in England from January 2020 to January 2021. Key parameters were calibrated based on reported covid-19 related deaths, hospitalised patients, and infection rates in England.

We assume that the first exposed case was imported to England on 15 January 2020, and the number of cases imported each day increased by one more case than the previous day until 9 February 2020 (the total number of cases imported in 25 days was therefore 351). We don't use the reproduction number ( $R_0$  or  $R_t$ ) as an input parameter, but derived the reproduction numbers based on a method used by Giordano and colleagues (see equation 55 in Mathematical equations)<sup>19</sup>. We estimated that the basic reproduction number ( $R_0$ ) was 3.68 at the initial stage of the COVID-19 epidemic before any control measures were taken in England, which is similar to findings from previous studies.<sup>7-11</sup> Following the implementation of NPI measures, the estimated reproduction value ( $R_t$ ) was reduced to 0.66 by 24 March. The  $R_t$  value was increased to 0.92 by 5 July 2020 after the NPI measures were relaxed, and  $R_t$  was about 1.13 after school reopening since September 2020. The  $R_t$  was reduced to 0.75 since 5 November 2020 after reintroducing NPI measures, increased to about 1.19 after relaxing NPIs since 2 December 2020, and reduced again to about 0.60 since 5 January 2021 after reintroducing lockdown measures (plus rolling out of vaccination) (appendix figure 3). The estimated  $R$  values were within the range of the reported in England (<https://coronavirus.data.gov.uk/>).

### Appendix figure 3 Estimated reproduction numbers, between 01/2020 – 01/2021, in England

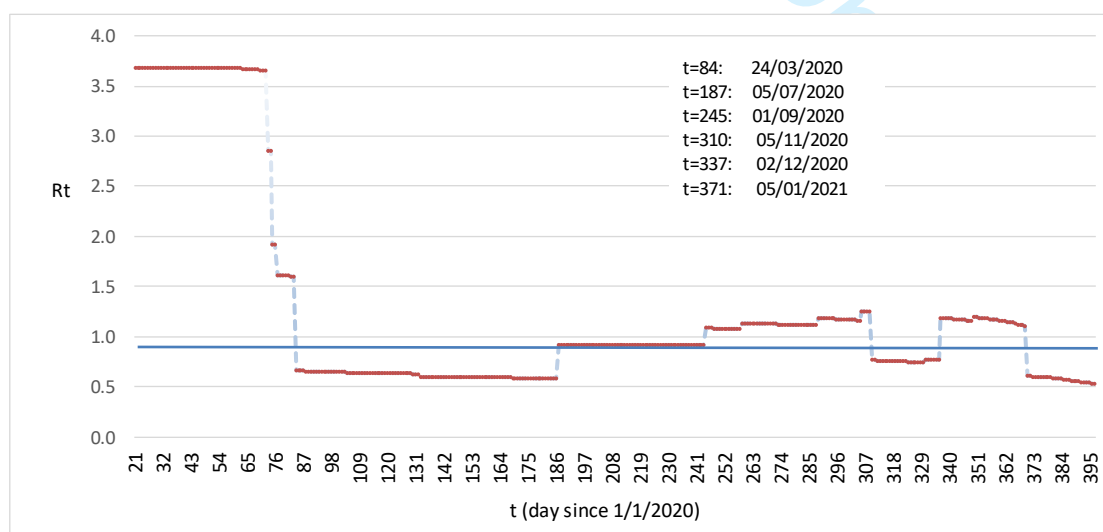

1  
2 The model estimated that the prevalence of the recovered was 5.5 by 26 April, 7.6% by 24 May, and  
3 8.5% by 24 June 2020, which were similar to the estimated rates of positive antibodies to Covid-19 in  
4 the UK (i.e., 7.1% in May-June 2020).<sup>20</sup> Data on the prevalence of infected individuals in the community  
5 was available from May 2020. The model estimated prevalence of infected individuals from January  
6 2020 to January 2021, which had a similar trend as the reported prevalence in England (appendix figure  
7 4).  
8  
9

10  
11  
12 **Appendix figure 4: Estimated and reported prevalence of infection, from January 2020 to January**  
13 **2021, in England**  
14  
15

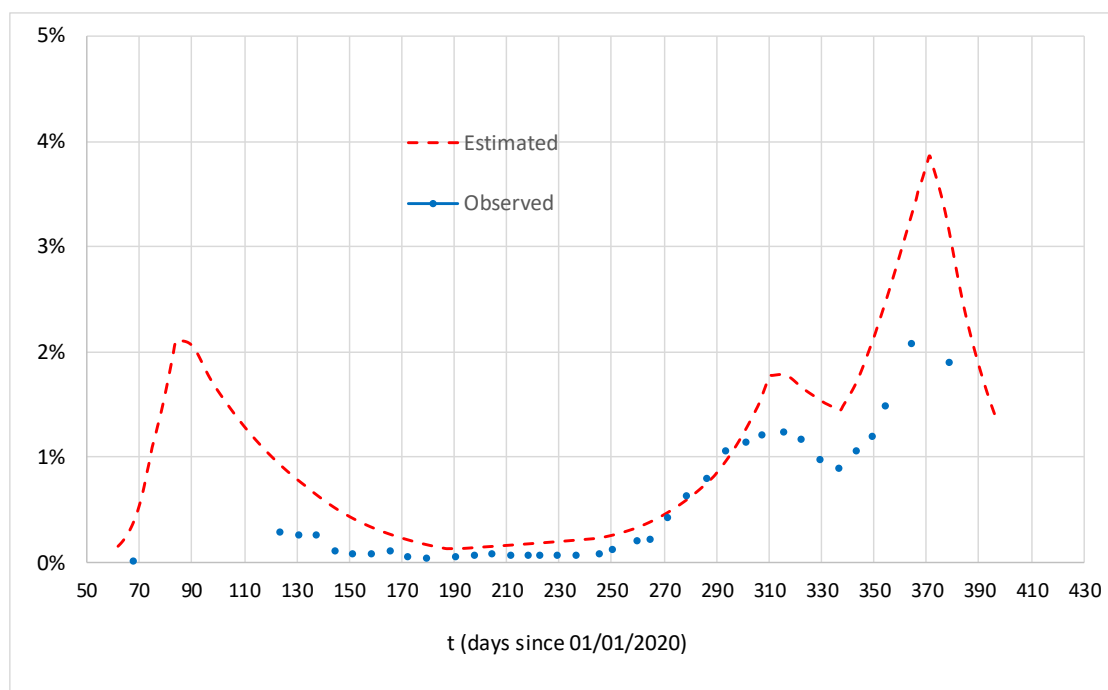

Changes in the estimated numbers of hospitalised COVID-19 patients were of similar trends as the reported numbers of hospitalised patients during 01/2020-01/2021. However, there were considerable differences at peak time points (appendix figure 5), which may be explained by reduced hospitalisation rates during peak period.

**Appendix figure 5: Reported and estimated numbers of hospitalised Covid-19 patients, during 01/2020-01/2021, in England**

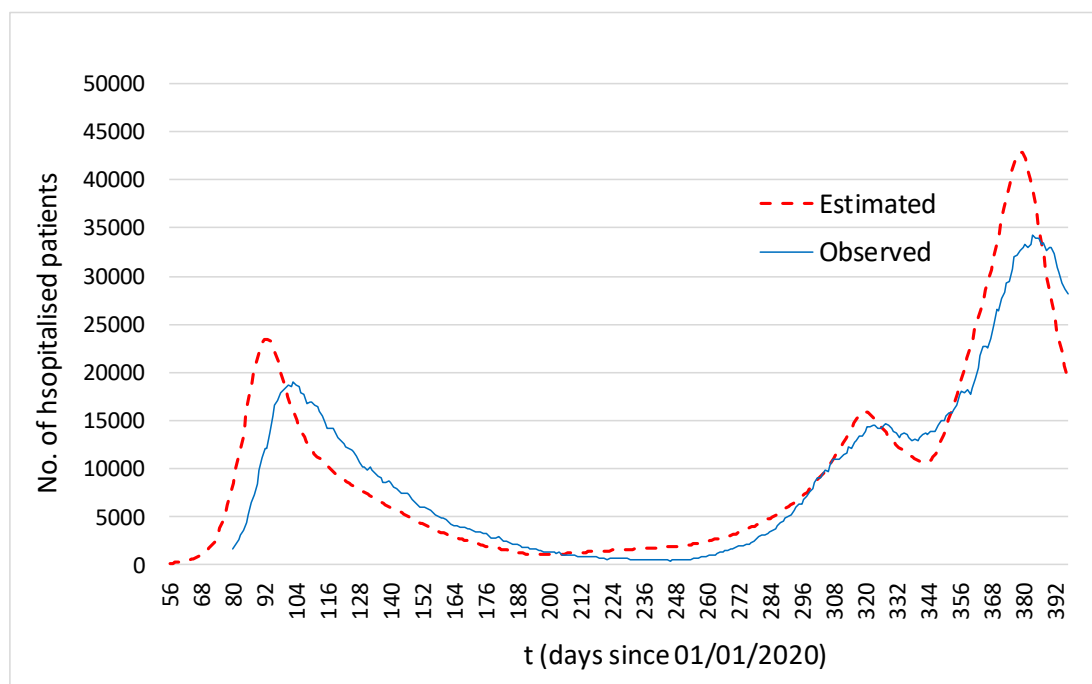

Appendix figure 6 shows that the estimated daily deaths well matched the observed daily deaths from Covid-19, from January 2020 to January 2021, in England.

**Appendix figure 6: Reported and estimated daily deaths from Covid-19, during 01/2020-01/2021, in England**

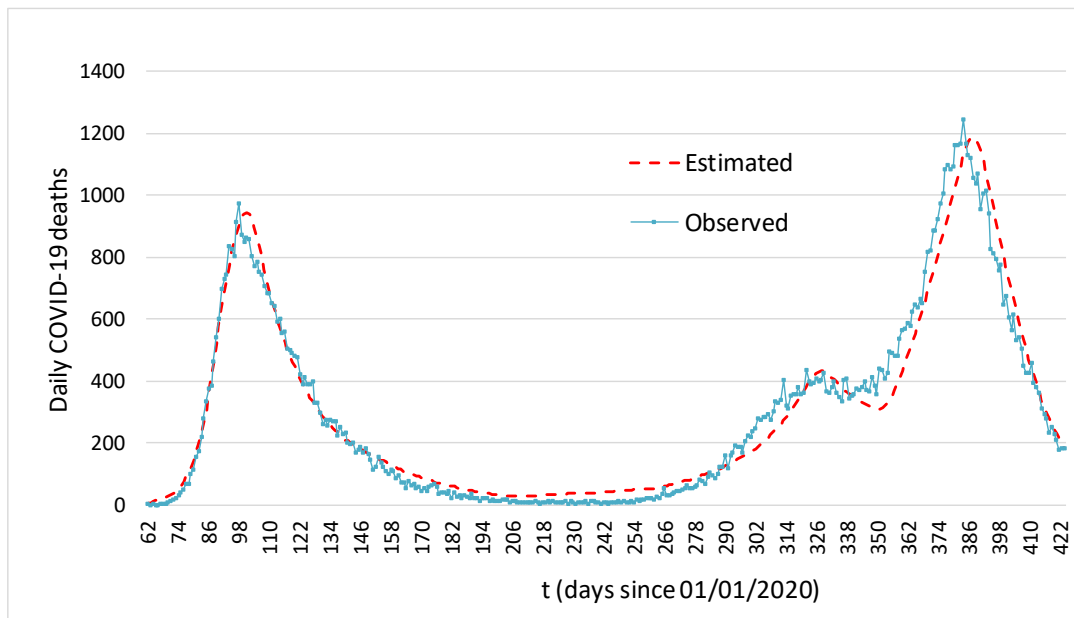

review only



### 3. Vaccination and projection scenarios

We used estimates of transmission parameters, age-specific hospitalisation rates and case fatality rates in January 2021 to project COVID-19 deaths from 2021-2029, under various scenarios of vaccine efficacy, durability of both naturally acquired and vaccine induced immunity, and reduction in reinfectivity. We assume that, since June 2021, there are no more restrictions on social activities, and social contracts are return to normal as before the pandemic, although basic hygienic measures would be maintained. Projection scenarios are defined from the following aspects: vaccine efficacy, durability of natural and vaccine induced sterilising immunity, and reduction in reinfectivity after the waning of infection protection immunity. In this study, we assume that the disease reduction and reinfectivity reduction immunity are long lasting, according to immunological characteristics of other endemic HCoVs.<sup>3</sup>

Results of randomised controlled trials shown that vaccines may be >90% efficacious (e.g., Pfizer mRNA vaccine) in reducing severe symptomatic diseases, compared with the placebo group. Assume that  $e_1$  and  $e_2$  are parameters of vaccine's efficacy in blocking virus transmission and reducing symptomatic cases in the infected, respectively. The reduction in symptomatic cases in the vaccine group may be due to the prevention of infection in susceptible individuals (i.e., infection protection, related to  $e_1$ ), or a lower proportion of infected individuals being symptomatic in the vaccine group (i.e., disease reduction, related to  $e_2$ ), or due to a combination of both. For a vaccine with 90% efficacy in reducing the number of symptomatic cases (compared with the control group), it is true that  $e_1 \cdot e_2 = (1 - 0.90)$ , or  $e_1 = (1 - 0.90) / e_2$ . There are many different possible combinations of  $e_1$  and  $e_2$  for a 90% efficacy in reducing symptomatic cases. Because of lack of empirical data, we assume that vaccine efficacy is equally attributable to infection and disease reduction in the main projections. The sterilising immunity after vaccination has been demonstrated. For example, an observational study in the UK (SIREN) found that the risk of being infected was reduced by 70% in health workers after one dose of the Pfizer-BioNTech vaccine.<sup>21 22</sup>

Vaccination of prioritised individuals began from 8 December 2020 in the UK and around 2 million individuals were vaccinated (mostly with a single dose of Pfizer vaccine) by 10 January 2021.<sup>23</sup> For simplicity, we assume that the mass vaccination starts from 1 January 2021 with a 80% coverage of eligible individuals. We assume that the maximum number of individuals vaccinated per day is 300,000 in England, which matched well with the actual number of vaccinated individuals (mostly with a single dose) in England according to the official statistics. The mass vaccination is modelled as an age-based phase approach, starting from people aged  $\geq 70$ , followed by individuals aged 60-69, 50-59, 20-49, and then those aged 16-19. Although both Pfizer-BioNTec and AstraZeneca vaccines are 2-dose regimens, the policy in the UK has been to initially provide the first dose to as many individuals as possible to

1  
2 maximise the public health impact. Exploratory assessment of data from clinical trials found that the  
3 short-term vaccine efficacy from the first dose of the Pfizer-BioNTech vaccine and the AstraZeneca  
4 vaccine is, respectively, about 90% and 70%.<sup>24</sup> For simplicity, we did not separate single or double dose  
5 vaccination, and assume that the overall vaccine efficacy is 70% or 90%, and the protection effects start  
6  
7 14 days after vaccination.  
8  
9

10 Available evidence has indicated that the duration of sterilising (infection protection) immunity after  
11 coronavirus infection ranges from 0.5 to two years.<sup>3</sup> Serum neutralizing antibodies were detected in all  
12 participants at four months follow up after SAR-CoV-2 mRNA vaccination.<sup>25</sup> Therefore, we assume  
13 that naturally acquired sterilising immunity lasts for 365 or 730 days, and vaccine-induced sterilising  
14 immunity lasts for 182, 365 or 730 days. After waning of sterilising immunity, individuals may be  
15 susceptible again to infection with SARS-CoV-2 virus, but the disease reduction immunity is likely  
16 longer lasting.<sup>3</sup> Due to the existence of disease reduction immunity, the reinfectivity of individuals  
17 who are reinfected after waning of sterilising immunity may be reduced. Lavine and colleagues  
18 estimated that the secondary transmissibility was 0.35 of the primary transmissibility (i.e., the  
19 reinfectivity was reduced by 65%).<sup>3</sup> Evidence from clinical trials and vaccination in the real world  
20 indicated that the viral loads and the duration of virus shedding in the infected individuals after  
21 vaccination were considerably reduced, compared with unvaccinated individuals.<sup>26 27</sup> Therefore, we  
22 assume that reinfectivity after waning of sterilising immunity is reduced by 20%, 40% or 60%. We  
23 also assume that the infectivity of ineffectively vaccinated individuals is the same as recovered  
24 individuals after the waning of sterilising immunity. In addition, we assume that vaccination of  
25 individuals recovered from natural infection boosts their naturally acquired immunity, which prevents  
26 or delays the waning of their sterilising immunity.  
27  
28  
29  
30  
31  
32  
33  
34  
35  
36  
37  
38

39 In this study, we focus on deaths in people infected with COVID-19, although our model also produces  
40 estimates of changes in effective reproduction values ( $R_t$ ), numbers of infected and vaccinated  
41 individuals, and hospitalised patients. We performed multiple simulations under various scenarios. For  
42 clarity, we focus on results of selected scenarios in the main text, but report more data on simulation  
43 results in Supplementary Tables.  
44  
45  
46  
47  
48  
49  
50  
51  
52  
53  
54  
55  
56  
57  
58  
59  
60

## 4. Model's mathematical equations

### Notations:

- subscript used: “s” refers to sex, 1: male, 2: female, 3: both male and female; “a” refers to age group, 1: 0-4 years, 2: 5-9 years, 3: 10-19, ..., 10:  $\geq 80$ ; 11: all age groups. “t” refers to time (day).
- $N$ : The number of the population
- $\lambda_s$ : Force of infection ( $\lambda$ ) measures the risk (probability) of infection transmission, which is a function of transmission rate ( $\beta$ ) and the prevalence of infectious individuals ( $I$ ) among the population ( $N$ ):  $\lambda = \beta \cdot I/N$ .<sup>1</sup>
- $\beta$ : The transmission rate  $\beta$  in this discrete-time model is defined as the average number of individuals infected daily by an infectious person. It is a function of the number of daily close contacts per person ( $c$ ), and the transmission risk per contact between a susceptible and an infectious individual ( $\eta$ ): i.e.,  $\beta = c \cdot \eta$ .<sup>2</sup>
- $\alpha_1$ : rate of progressing from being exposed to being infectious.
- $\alpha_2$ : rate of progressing from being asymptomatic infectious to symptomatic.
- $\mu$ : proportion of infected individuals who will be symptomatic; age-specific
- $infA$ : The fraction of infection force for infected individuals with no or mild symptoms. It was assumed that  $infA=0.5$  in this study.
- $fS_0$ : fraction of symptomatic patients who will not be quarantined.
- $fS_q$ : fraction of symptomatic patients who will be quarantined (self-isolation).
- $fS_h$ : fraction of symptomatic patients who will be hospitalised (including ICU admission).
- $\gamma_{A0}$ : rate of recovering for asymptomatic individuals
- $\gamma_{S0}$ : rate of recovering for symptomatic, not isolated/hospitalised patients
- $\gamma_{S1}$ : rate of being isolated in symptomatic patients
- $\gamma_{S2}$ : rate of recovering in isolated patients
- $\gamma_{H1}$ : rate of being hospitalised for symptomatic patients
- $\gamma_{H2}$ : rate of recovering in hospitalised patients
- $v_1$ : rate of vaccinating susceptible individuals
- $v_2$ : rate of vaccinating recovered individuals
- $\rho$ : Relative infectivity of the secondary infection ( $I_2$ ) compared with the primary infection ( $I_1$ ). For example, if  $\rho=0.6$ , the infectivity of  $I_2$  is 40% lower than the infectivity of  $I_1$
- $e_1$ : Relative efficacy of vaccine for sterilising immunity, reducing risk of virus transmission
- $e_2$ : Relative efficacy of vaccine for pathology reduction, reducing the proportion of symptomatic cases after being infected
- $IA$ : Asymptomatic individuals
- $IS$ : Symptomatic patients

- $\gamma_a$  : Average rate of recovering of asymptomatic individuals
- $\gamma_s$  : Average rate of recovering of asymptomatic individuals
- $u_v$ : rate of immunity waning in vaccinated individuals
- $u_r$ : rate of immunity waning in recovered individuals
- $drOth_{s,a,t}$ : sex, age-specific risk of deaths from causes other than covid-19, specific by week of the year.
- $drCov_{s,a,t}$ : death risk from infected individuals before recovery, specific according to days since being infected.
- $ds0$ ,  $dsq$ , and  $dhos$  are the proportion of covid-19 deaths among symptomatic patients who are not quarantined, those who are isolated, or hospitalised, respectively.  $1=ds0+dsq+dhos$

Sex and age specific population:

$$N_{s,a,t} = SU_{s,a,t} + SUR_{s,a,t} + VAC1_{s,a,t} + EX1_{s,a,t} + I01_{s,a,t} + EX2_{s,a,t} + I02_{s,a,t} + IA_{s,a,t} + IS0_{s,a,t} + ISQ_{s,a,t} + ISH_{s,a,t} + RE_{s,a,m,t} \quad (1)$$

Total number of the primary infection with no symptoms (age-specific):

$$aIA1_{a,t} = \sum_s (IA1_{s,a,t} + I01_{s,a,t} \cdot (1 - \mu_a)) \quad (2)$$

Total number of the primary infections with symptoms, isolated (age-specific):

$$aISQ1_{a,t} = \sum_s (ISQ1_{s,a,t}) \quad (3)$$

Total number of the primary infections with symptoms, not isolated (age-specific):

$$aIS01_{a,t} = \sum_s (IS01_{s,a,t} + I01_{s,a,t} \cdot \mu_a) \quad (4)$$

Total number of the secondary infection with no symptoms (age-specific):

$$aIA2_{a,t} = \sum_s (IA2_{s,a,t} + I02_{s,a,t} \cdot (1 - \mu_a \cdot e_2)) \quad (5)$$

Total number of the secondary infections with symptoms, isolated (age-specific):

$$aISQ2_{a,t} = \sum_s (ISQ2_{s,a,t}) \quad (6)$$

Total number of the secondary infections with symptoms, not isolated (age-specific):

$$aIS02_{a,t} = \sum_s (IS02_{s,a,t} + I02_{s,a,t} \cdot \mu_a \cdot e_2) \quad (7)$$

-----

Sex and age specific susceptible population:

$$SU_{s,a,t+1} = (SU_{s,a,t} - suExp_{s,a,t} - VAC1_{s,a,t}) \cdot (1 - drOth_{s,a,t}) + NewBirth_{s,t} \quad (8)$$

Note:  $drOth_{s,a,t}$  is sex, age-specific death rates for non-covid causes, specific by week of the year.

Newly exposed/infected with SARS-CoV-2 in susceptible individuals:

$$suExp_{s,a,t} = \sum_{j=1}^{10} SU_{s,a,t} \cdot \eta_t \left( \left( Ca_{a,j,t} \cdot \frac{infA \cdot aIA1_{j,t} + aIS1_{j,t}}{N_{3,j,t}} + Cb_{a,j,t} \cdot \frac{aISQ1_{j,t}}{N_{3,j,t}} \right) + \rho \cdot \left( Ca_{a,j,t} \cdot \frac{infA \cdot aIA2_{j,t} + aIS2_{j,t}}{N_{3,j,t}} + Cb_{a,j,t} \cdot \frac{aISQ2_{j,t}}{N_{3,j,t}} \right) \right) \quad (9)$$

Notes:  $Ca_{a,j,t}$  is the average number of general contacts between people aged  $a$  and  $j$ ; and  $Cb_{a,j,t}$  is the average number of household contacts between people age  $a$  and  $j$ .

Newly exposed/infected in vaccinated individuals:

$$vacExp_{s,a,t} = \sum_{j=1}^{10} VAC1_{s,a,t} \cdot \eta_t \cdot e_1 \left( \left( Ca_{a,j,t} \cdot \frac{infA \cdot aIA1_{j,t} + aIS1_{j,t}}{N_{3,j,t}} + Cb_{a,j,t} \cdot \frac{aISQ1_{j,t}}{N_{3,j,t}} \right) + \rho \cdot \left( Ca_{a,j,t} \cdot \frac{infA \cdot aIA2_{j,t} + aIS2_{j,t}}{N_{3,j,t}} + Cb_{a,j,t} \cdot \frac{aISQ2_{j,t}}{N_{3,j,t}} \right) \right) \quad (10)$$

Newly exposed/infected in the recovered or vaccinated after waning of immunity:

$$sureExp_{s,a,t} = \sum_{j=1}^{10} SURE_{s,a,t} \cdot \eta_t \left( \left( Ca_{a,j,t} \cdot \frac{infA \cdot aIA1_{j,t} + aIS1_{j,t}}{N_{3,j,t}} + Cb_{a,j,t} \cdot \frac{aISQ1_{j,t}}{N_{3,j,t}} \right) + \rho \cdot \left( Ca_{a,j,t} \cdot \frac{infA \cdot aIA2_{j,t} + aIS2_{j,t}}{N_{3,j,t}} + Cb_{a,j,t} \cdot \frac{aISQ2_{j,t}}{N_{3,j,t}} \right) \right) \quad (11)$$

The number of the recovered or vaccinated who lose sterilising immunity ( $d$  from 1 to  $tt$ ):

$$SURE_{s,a,t+1} = (SURE_{s,a,t} - sureEXP_{s,a,t}) \cdot (1 - drOth_{s,a,t}) + \sum_{d=1}^{tt} (iRE_{s,a,d,t} \cdot \omega_{r,d} + iVAC1_{s,a,d,t} \cdot \omega_{v,d}) \quad (12)$$

Notes: “ $tt$ ” is the total number of days simulated.  $\omega_{r,d}$  and  $\omega_{v,d}$  are gamma distributed rate of immunity waning, respectively, a function of days since the recovery and vaccination.  $iRE_{s,a,d,t}$  is the number of recovered since  $d$  days from recovery; and  $iVAC1_{s,a,d,t}$  is the number of vaccinated since  $d$  days after vaccination.

The number of new ( $d=1$ ) primary infections in susceptible individuals:

$$iEX1_{s,a,1,t} = suEXP_{s,a,t} \quad (13)$$

The number of new ( $d=1$ ) secondary infections in recovered or vaccinated individuals:

$$iEX2_{s,a,1,t} = sureEXP_{s,a,t} + vacExp_{s,a,t} \quad (14)$$

For  $d=1,2,3\dots 60$  (assuming all will be dead or recovered by day 60 after being infected):

$$iEX1_{s,a,d+1,t+1} = iEX1_{s,a,d,t} \cdot (1 - \alpha1_d) \quad (15)$$

$$iEX2_{s,a,d+1,t+1} = iEX2_{s,a,d,t} \cdot (1 - \alpha1_d) \quad (16)$$

Assumed that covid-19 deaths were from symptomatic patients only. Overall deaths from covid-19 were calculated using the case fatality rates, and timing of covid-19 related deaths were assumed to have a gamma distribution according to days since being infected. Therefore a variable was introduced to record number of symptomatic individuals by days since being exposed/infected to calculate number of covid-19 deaths:

$$iSY_{s,a,1,t} = \mu_a (suExp_{s,a,t} + e_2 \cdot (surExp_{s,a,t} + vacExp_{s,a,t})) \quad (17)$$

For  $d=1,2,3\dots 60$  (the transmission completed by day 60):

$$iSY_{s,a,d+1,t+1} = iSY_{s,a,d,t} \cdot (1 - drCov_{s,a,d}) \quad (18)$$

The number of covid-19 deaths at time t:

$$dthCov_{s,a,t} = \sum_{d=1}^{60} iSY_{s,a,d,t} \cdot drCov_{s,a,d} \quad (19)$$

The number of new ( $d=1$ ) primary infections individuals before onset of symptoms:

$$iI01_{s,a,1,t+1} = \sum_{d=1}^{60} iEX1_{s,a,d,t} \cdot \alpha1_d \quad (20)$$

The number of new ( $d=1$ ) secondary infectious individuals before onset of symptoms:

$$iI02_{s,a,1,t+1} = \sum_{d=1}^{60} iEX2_{s,a,d,t} \cdot \alpha1_d \quad (21)$$

For  $d=1,2,3\dots 60$  (the transmission completed by day 60):

$$iI01_{s,a,d+1,t+1} = iI01_{s,a,d,t} \cdot (1 - \alpha2_d) \quad (22)$$

$$iI02_{s,a,d+1,t+1} = iI02_{s,a,d,t} \cdot (1 - \alpha2_d) \quad (23)$$

The number of all infectious individuals before onset of symptoms:

$$iI0_{s,a,t} = \sum_{d=1}^{60} iI0_{s,a,d,t} \quad (24)$$

The number of new ( $d=1$ ) infected individuals with no or very mild symptoms:

$$iIA_{s,a,1,t+1} = \sum_{d=1}^{60} (iI01_{s,a,d,t} \cdot \alpha2_d \cdot (1 - \mu_a) + iI02_{s,a,d,t} \cdot \alpha2_d \cdot (1 - e_2 \mu_a)) \quad (25)$$

For  $d=1,2,3\dots 60$  (the transmission completed by day 60):

$$iIA_{s,a,d+1,t+1} = iIA_{s,a,d,t} \cdot (1 - \gamma A_d) \quad (26)$$

The number of all infectious individuals with no or mild symptoms:

$$IA_{-}(s, a, t) = \sum_{d=1}^{60} iIA_{s,a,d,t} \quad (27)$$

The number of all new ( $d=1$ ) symptomatic patients:

$$SYM_{s,a,t+1} = \sum_{d=1}^{60} (iI01_{s,a,d,t} + e_2 \cdot iI02_{s,a,d,t}) \cdot \alpha 2_d \cdot \mu_a \quad (28)$$

The number of new ( $d=1$ ) symptomatic patients who are not self-isolated:

$$iIS0_{s,a,1,t} = SYM_{s,a,t} \cdot fS0_t \quad (29)$$

Symptomatic patients (before being isolated or hospitalised):

$$iIS0_{s,a,d+1,t+1} = (iIS0_{s,a,d,t} - dthCov_{s,a,t} \cdot ds0_d) \cdot (1 - YS0_d) \quad (30)$$

The number of new ( $d=1$ ) symptomatic patients being isolated/quarantined:

$$iSQ_{s,a,1,t} = SYM_{s,a,t} \cdot fSq_{a,t} \quad (31)$$

Isolated symptomatic patients:

$$iSQ_{s,a,d+1,t+1} = \sum_{d=1}^{60} (iSQ_{s,a,d,t} - dthCov_{s,a,t} \cdot dsq_d) \cdot (1 - YS1_d) \quad (32)$$

The number of new ( $d=1$ ) symptomatic patients being hospitalised:

$$iSH_{s,a,1,t} = SYM_{s,a,t} \cdot fSh_{a,t} \quad (33)$$

Hospitalised symptomatic patients:

$$iSH_{s,a,d+1,t+1} = \sum_{d=1}^{60} (iSH_{s,a,d,t} - dthCov_{s,a,t} \cdot dsh_d) \cdot (1 - YH1_d) \quad (34)$$

The number newly recovered people ( $d=1$ ):

$$iRE_{s,a,1,t+1} = \sum_{d=1}^{60} (iIA_{s,a,d,t} \cdot \gamma A0_d + iIS0_{s,a,d,t} \cdot YS0_d + iISQ_{s,a,d,t} \cdot YS2_d + iSH_{s,a,d,t} \cdot YH2_d + VAC2_t) \quad (35)$$

Note:  $VAC2_t$  is the number of newly vaccinated individuals who recovered from previous infections.

All recovered for  $d=1,2,3\dots tt$ :

$$iRE_{s,a,d+1,t+1} = (iRE_{s,a,d,t} - VAC2_t) \cdot (1 - \mu r_d) \cdot (1 - drOth_{s,a,t}) \quad (36)$$

All recovered individuals:

$$RE_{s,a,t} = \sum_{d=1}^{tt} iRE_{s,a,d,t} \quad (37)$$

### Derived reproduction values (R0, Rt)

The basic reproduction ratio (R0) is defined as the average number of individuals infected by a typical infectious individual in a total susceptible population, and effective reproduction ratio (Rt) is the number of individuals infected by an infectious individual when only a proportion of the population are susceptible and the disease transmission dynamic may be influenced by control measures.<sup>28</sup> R values depend on the risk of infection per contact between an infectious and susceptible person, person-to-person contacts between individuals, the rate of transition from exposed to infectious, infectious period, and the prevalence of susceptible individuals in the population.<sup>1</sup> In this study, we don't use the reproduction ratio directly in simulating the spread of SARS-CoV-2 virus. To facilitate the understanding of effects of different intervention strategies, we estimated R0 and Rt during the simulation period, based on average values of relevant parameters and the calculation method used in a modelling study by Giordano et al.<sup>19</sup>

Average values of relevant parameters for estimating R values:

Weighted average fraction of symptomatic individuals in all infected individuals:

$$fS_t = \sum_a (\mu_a \cdot N_{3,a,t} / N_{3,11,t}) \quad (38)$$

Weighted average fraction of hospitalised symptomatic patients:

$$fH_t = \sum_a (fSH_{a,t} \cdot N_{3,a,t} / N_{3,11,t}) \quad (39)$$

Weighted average fraction of symptomatic patients self-isolated:

$$fQ_t = \sum_a (fSQ_{a,t} \cdot N_{3,a,t} / N_{3,11,t}) \quad (40)$$

Risk of daily transmission per infectious individual, depending on asymptomatic or symptomatic, household isolated or not:

$$\beta I O_t = \sum_{a,j=1}^{10} \mu_t \cdot Ca_{a,j,t} \cdot \frac{N_{j,t}}{N_{3,11,t}} \cdot (infA \cdot (1 - fS_t) + fS_t) \quad (41)$$

$$\beta I A_t = \sum_{a,j=1}^{10} \mu_t \cdot Ca_{a,j,t} \cdot \frac{N_{j,t}}{N_{3,11,t}} \cdot infA \cdot (1 - fS_t) \quad (42)$$



$$\beta SQ_t = \sum_{a,j=1}^{10} \mu_t \cdot Cb_{a,j,t} \cdot \frac{N_{j,t}}{N_{3,11,t}} \cdot (infA \cdot (1 - fS_t) + fS_t) \quad (43)$$

$$\beta S0_t = \sum_{a,j=1}^{10} \mu_t \cdot Ca_{a,j,t} \cdot \frac{N_{j,t}}{N_{3,11,t}} \quad (44)$$

The following transition variables are calculated for estimating R values:

$$d1_t = \alpha 2_t \cdot (1 - fS_t) \quad (45)$$

$$d2_t = \alpha 2_t \cdot fS_t \cdot fS0_t \quad (46)$$

$$d3_t = \alpha 2_t \cdot fS_t \cdot fSQ_t \quad (47)$$

$$d4_t = \alpha 2_t \cdot fS_t \cdot fSH_t \quad (48)$$

$$dA1_t = d1_t + d2_t + d3_t + d4_t \quad (49)$$

$$d5_t = \alpha 2_t \cdot (1 - fS_t \cdot e_2) \quad (50)$$

$$d6_t = \alpha 2_t \cdot fS_t \cdot fS0_t \cdot e_2 \quad (51)$$

$$d7_t = \alpha 2_t \cdot fS_t \cdot fSQ_t \cdot e_2 \quad (52)$$

$$d8_t = \alpha 2_t \cdot fS_t \cdot fSH_t \cdot e_2 \quad (53)$$

$$dA2_t = d5_t + d6_t + d7_t + d8_t \quad (54)$$

Effective reproductive value (Rt):

$$Rt = \frac{SU_{3,11,t}}{N_{3,11,t}} \left( \beta I0_t \cdot \frac{1}{dA1_t} + \beta IA_t \cdot \frac{d1_t}{dA1_t \cdot \gamma A0_t} + \beta S0_t \cdot \frac{d2_t}{dA1_t \cdot \gamma S0_t} + \beta SQ_t \cdot \frac{d3_t}{dA1_t \cdot \gamma S1_t} + \beta SH_t \cdot \frac{d4_t}{dA1_t \cdot \gamma H1_t} \right) + \left( \frac{SURE_{3,11,t}}{N_{3,11,t}} + \frac{VAC_{3,11,t}}{N_{3,11,t}} \cdot e_1 \right) \cdot \rho \cdot \left( \beta I0_t \cdot \frac{1}{dA2_t} + \beta IA_t \cdot \frac{d5_t}{dA2_t \cdot \gamma A0_t} + \beta S0_t \cdot \frac{d6_t}{dA2_t \cdot \gamma S0_t} + \beta SQ_t \cdot \frac{d7_t}{dA2_t \cdot \gamma S1_t} + \beta SH_t \cdot \frac{d8_t}{dA2_t \cdot \gamma H1_t} \right) \quad (55)$$

## 5. References for supplementary material

1. Rock K, Brand S, Moir J, et al. Dynamics of infectious diseases. *Rep Prog Phys* 2014;77(2):026602. doi: 10.1088/0034-4885/77/2/026602 [published Online First: 2014/01/22]
2. Tuckwell HC, Williams RJ. Some properties of a simple stochastic epidemic model of SIR type. *Math Biosci* 2007;208(1):76-97. doi: 10.1016/j.mbs.2006.09.018 [published Online First: 2006/12/19]
3. Lavine JS, Bjornstad ON, Antia R. Immunological characteristics govern the transition of COVID-19 to endemicity. *Science (New York, NY)* 2021;371(6530):741-45. doi: 10.1126/science.abe6522 [published Online First: 2021/01/14]
4. Olliaro P. What does 95% COVID-19 vaccine efficacy really mean? *Lancet Infect Dis* 2021 doi: 10.1016/s1473-3099(21)00075-x [published Online First: 2021/02/21]
5. Grant A. Dynamics of COVID-19 epidemics: SEIR models underestimate peak infection rates and overestimate epidemic duration. *medRxiv preprint doi: <https://doi.org/10.1101/2020040220050674>* 2020
6. Krylova O, Earn DJD. Effects of the infectious period distribution on predicted transitions in childhood disease dynamics. *J R Soc Interface* 2013;10(84):20130098-98. doi: 10.1098/rsif.2013.0098
7. Davies NG, Kucharski AJ, Eggo RM, et al. Effects of non-pharmaceutical interventions on COVID-19 cases, deaths, and demand for hospital services in the UK: a modelling study. *The Lancet Public health* 2020;5(7):e375-e85. doi: 10.1016/s2468-2667(20)30133-x [published Online First: 2020/06/06]
8. Gov.uk. Coronavirus (COVID-19) in the UK, 2020.
9. Davies NG, Klepac P, Liu Y, et al. Age-dependent effects in the transmission and control of COVID-19 epidemics. *Nature medicine* 2020;26(8):1205-11. doi: 10.1038/s41591-020-0962-9 [published Online First: 2020/06/18]
10. Zhang J, Litvinova M, Wang W, et al. Evolving epidemiology and transmission dynamics of coronavirus disease 2019 outside Hubei province, China: a descriptive and modelling study. *Lancet Infect Dis* 2020 doi: 10.1016/s1473-3099(20)30230-9 [published Online First: 2020/04/06]
11. Ferguson N, Laydon D, Nedjati-Gilani G, et al. Impact of non-pharmaceutical interventions (NPIs) to reduce COVID-19 mortality and healthcare demand.: Imperial College COVID-19 Response Team., 2020.
12. Verity R, Okell LC, Dorigatti I, et al. Estimates of the severity of coronavirus disease 2019: a model-based analysis. *Lancet Infect Dis* 2020 doi: 10.1016/s1473-3099(20)30243-7 [published Online First: 2020/04/03]
13. Chinese Center of Disease Prevention and Control. [The epidemiological characteristics of an outbreak of 2019 novel coronavirus diseases (COVID-19) in China]. *Zhonghua Liu Xing Bing Xue Za Zhi* 2020;41(2):145-51. doi: 10.3760/cma.j.issn.0254-6450.2020.02.003 [published Online First: 2020/02/18]
14. Gov.uk. Slides and datasets to accompany coronavirus press conference: 5 June 2020. Published 5 June 2020 ed, 2020.

15. Mossong J, Hens N, Jit M, et al. Social contacts and mixing patterns relevant to the spread of infectious diseases. *PLoS Med* 2008;5(3):e74. doi: 10.1371/journal.pmed.0050074 [published Online First: 2008/03/28]
16. Prem K, Cook AR, Jit M. Projecting social contact matrices in 152 countries using contact surveys and demographic data. *PLoS Comput Biol* 2017;13(9):e1005697. doi: 10.1371/journal.pcbi.1005697 [published Online First: 2017/09/13]
17. Office for National Statistics. Dataset: 2018-based National population projections table of contents, 2018.
18. Mahase E. Covid-19: What have we learnt about the new variant in the UK? *Bmj* 2020;371:m4944. doi: 10.1136/bmj.m4944 [published Online First: 2020/12/29]
19. Giordano G, Blanchini F, Bruno R, et al. Modelling the COVID-19 epidemic and implementation of population-wide interventions in Italy. *Nature medicine* 2020;26(6):855-60. doi: 10.1038/s41591-020-0883-7 [published Online First: 2020/04/24]
20. Gov.uk. Official Statistics. UK Biobank COVID-19 antibody study: round 1 results. : Department of Health & Social Care [Available from: <https://www.gov.uk/government/publications/uk-biobank-covid-19-seroprevalence-study-round-1-results/uk-biobank-covid-19-seroprevalence-study-round-1-results> accessed Published 30 July 2020. .
21. Hall ea. Effectiveness of BNT162b2 mRNA Vaccine Against Infection and COVID-19 Vaccine Coverage in Healthcare Workers in England, Multicentre Prospective Cohort Study (the SIREN Study). *Lancet (preprint)* 2021
22. Ramsay M. COVID-19: analysing first vaccine effectiveness in the UK 2021 [updated 23 February 2021. Available from: <https://publichealthmatters.blog.gov.uk/2021/02/23/covid-19-analysing-first-vaccine-effectiveness-in-the-uk/>.
23. Mahase E. Covid-19: UK approves Pfizer and BioNTech vaccine with rollout due to start next week. 2020;371:m4714. doi: 10.1136/bmj.m4714 %J BMJ
24. Department of Health and Social Care. Optimising the covid-19 vaccination programme for maximum short-term impact. 2021 [Available from: <https://www.gov.uk/government/publications/prioritising-the-first-covid-19-vaccine-dose-jcvi-statement/optimising-the-covid-19-vaccination-programme-for-maximum-short-term-impact>.
25. Widge AT, Roupael NG, Jackson LA, et al. Durability of Responses after SARS-CoV-2 mRNA-1273 Vaccination. *The New England journal of medicine* 2021;384(1):80-82. doi: 10.1056/NEJMc2032195 [published Online First: 2020/12/04]
26. Levine-Tiefenbrun M, Yelin I, Katz R, et al. Decreased SARS-CoV-2 viral load following vaccination. 2021:2021.02.06.21251283. doi: 10.1101/2021.02.06.21251283 %J medRxiv
27. Emary KRW, Golubchik T, Aley PK, et al. Efficacy of ChAdOx1 nCoV-19 (AZD1222) Vaccine Against SARS-CoV-2 VOC 202012/01 (B.1.1.7). SSRN [Preprint]. 2021. DOI: 10.2139/ssrn.3779160. Available at: [https://papers.ssrn.com/sol3/papers.cfm?abstract\\_id=3779160](https://papers.ssrn.com/sol3/papers.cfm?abstract_id=3779160) 2021
28. Liu QH, Ajelli M, Aleta A, et al. Measurability of the epidemic reproduction number in data-driven contact networks. *Proceedings of the National Academy of Sciences of the United States of America* 2018;115(50):12680-85. doi: 10.1073/pnas.1811115115 [published Online First: 2018/11/23]

# BMJ Open

## Vaccination against COVID-19 and society's return to normality in England: a modelling study of impacts of different types of naturally acquired and vaccine induced immunity

|                                 |                                                                                                                                   |
|---------------------------------|-----------------------------------------------------------------------------------------------------------------------------------|
| Journal:                        | <i>BMJ Open</i>                                                                                                                   |
| Manuscript ID                   | bmjopen-2021-053507.R1                                                                                                            |
| Article Type:                   | Original research                                                                                                                 |
| Date Submitted by the Author:   | 15-Aug-2021                                                                                                                       |
| Complete List of Authors:       | Song, Fujian; University of East Anglia Norwich Medical School<br>Bachmann, Max; University of East Anglia Norwich Medical School |
| <b>Primary Subject Heading</b>: | Infectious diseases                                                                                                               |
| Secondary Subject Heading:      | Public health, Epidemiology                                                                                                       |
| Keywords:                       | COVID-19, Infection control < INFECTIOUS DISEASES, Public health < INFECTIOUS DISEASES, Immunology < NATURAL SCIENCE DISCIPLINES  |
|                                 |                                                                                                                                   |

SCHOLARONE™  
Manuscripts



I, the Submitting Author has the right to grant and does grant on behalf of all authors of the Work (as defined in the below author licence), an exclusive licence and/or a non-exclusive licence for contributions from authors who are: i) UK Crown employees; ii) where BMJ has agreed a CC-BY licence shall apply, and/or iii) in accordance with the terms applicable for US Federal Government officers or employees acting as part of their official duties; on a worldwide, perpetual, irrevocable, royalty-free basis to BMJ Publishing Group Ltd ("BMJ") its licensees and where the relevant Journal is co-owned by BMJ to the co-owners of the Journal, to publish the Work in this journal and any other BMJ products and to exploit all rights, as set out in our [licence](#).

The Submitting Author accepts and understands that any supply made under these terms is made by BMJ to the Submitting Author unless you are acting as an employee on behalf of your employer or a postgraduate student of an affiliated institution which is paying any applicable article publishing charge ("APC") for Open Access articles. Where the Submitting Author wishes to make the Work available on an Open Access basis (and intends to pay the relevant APC), the terms of reuse of such Open Access shall be governed by a Creative Commons licence – details of these licences and which [Creative Commons](#) licence will apply to this Work are set out in our licence referred to above.

Other than as permitted in any relevant BMJ Author's Self Archiving Policies, I confirm this Work has not been accepted for publication elsewhere, is not being considered for publication elsewhere and does not duplicate material already published. I confirm all authors consent to publication of this Work and authorise the granting of this licence.

1  
2  
3  
4  
5 **Vaccination against COVID-19 and society's return to normality in**  
6 **England: a modelling study of impacts of different types of naturally**  
7 **acquired and vaccine induced immunity**  
8  
9  
10  
11  
12  
13  
14

15 Fujian Song<sup>1</sup>, Max O. Bachmann<sup>1</sup>

16  
17  
18 1. Norwich Medical School, University of East Anglia, Norwich, Norfolk, NR4 7TJ  
19  
20

21 Correspondence to: Fujian Song, email: [fujian.song@uea.ac.uk](mailto:fujian.song@uea.ac.uk)  
22  
23  
24  
25  
26  
27  
28  
29  
30  
31  
32  
33  
34  
35  
36  
37  
38  
39  
40  
41  
42  
43  
44  
45  
46  
47  
48  
49  
50  
51  
52  
53  
54  
55  
56  
57  
58  
59  
60

## ABSTRACT

**Objectives:** To project impacts of mass vaccination against COVID-19, and investigate possible impacts of different types of naturally acquired and vaccine-induced immunity on future dynamics of SARS-CoV-2 transmission from 2021 to 2024 in England.

**Design:** Deterministic, compartmental, discrete-time SEIR modelling.

**Participants:** Population in England.

**Interventions:** mass vaccination programmes.

**Outcome measures:** daily and cumulative number of deaths from COVID-19.

**Results:** If vaccine efficacy remains high (85%), the vaccine-induced sterilising immunity lasts  $\geq 182$  days, and the reinfectivity is greatly reduced (by  $\geq 60\%$ ), annual mass vaccination programmes can prevent further COVID-19 outbreaks in England. Under optimistic scenarios, with annual revaccination programmes, the cumulative number of COVID-19 deaths is estimated to be from 130,000 to 150,000 by the end of 2024. However, the total number of COVID-19 deaths may be up to 431,000 by the end of 2024, under scenarios with compromised vaccine efficacy (62.5%), short duration of natural and vaccine immunity (365/182 days), and small reduction in reinfectivity (30%).

**Conclusions:** Under optimistic scenarios, mass immunisation using efficacious vaccines may enable society safely to return to normality. However, under plausible scenarios with low vaccine efficacy and short durability of immunity, COVID-19 could continue to cause recurrent waves of severe morbidity and mortality despite frequent vaccinations. It is crucial to monitor the vaccination effects in the real world, and to better understand characteristics of naturally acquired and vaccine induced immunity against SARS-CoV-2.

## ARTICLE SUMMARY:

### Strengths and limitations of this study

- This is the first modelling study to explicitly investigate the impacts of different types of immune responses to SARS-CoV-2 infection and vaccines on the COVID-19 epidemic in England.
- The model has been verified based on historically observed data in England, and a large number of projection scenarios are explored.
- This is a deterministic model to answer “what-if” questions, and uncertainty in estimated parameters may have not been fully accommodated.
- There remain many uncertainties regarding durability and types of naturally acquired and vaccine-induced immunity against SARS-CoV-2 virus.



## INTRODUCTION

The COVID-19 pandemic caused by the spread of SARS-CoV-2 virus has resulted in a huge number of deaths and severe disruptions of economies and social activities around the world. The spread of the SARS-CoV-2 virus can be suppressed by non-pharmaceutical interventions (NPIs) and lockdown measures.<sup>1</sup> Because of their disruptive socioeconomic consequences, lockdown restrictions cannot last indefinitely.

Only a few months after the initial identification of SARS-CoV-2 pathogen, there were more than 200 vaccine candidates in development globally.<sup>2</sup> Results of randomised controlled trials shown that vaccines were efficacious in reducing symptomatic diseases, compared with placebo.<sup>3,4</sup> Between 3 December 2020 and 31 July 2021, four vaccines against COVID-19 were approved for emergency use in the UK, and a vaccination programme has been started to rollout since 8 December 2020, prioritised primarily by age and comorbidity, with older people being vaccinated first.<sup>5</sup> By 30 July 2021, the coverage rate of vaccination in adults aged  $\geq 18$  in the UK was 88.5% for dose-1 and 72.1% for dose-2 of COVID-19 vaccines.<sup>6</sup> Although the number of people infected with SARS-CoV-2 virus in the UK was large during June-July 2021, numbers of hospitalised COVID-19 patients and related deaths had remained relative low, partly due to the protection of vaccines.<sup>6</sup> Therefore, lockdown restrictions in England have been mostly lifted since 19 July 2021.<sup>7</sup> Although mass vaccination is a promising strategy to enable society to safely return to normality, without mandatory NPIs, there is great uncertainty about the effects of COVID-19 vaccines and society's return to normality, including vaccines' long-term efficacy and emerging new variants of SARS-CoV-2 virus.<sup>8,9</sup>

There have been many mathematical modelling studies to investigate COVID-19 dynamics and the impacts of control measures (for example <sup>10-13</sup>). Several modelling studies evaluated impacts of vaccines on the dynamics and consequences of COVID-19 epidemics in the UK.<sup>14-17</sup> Two of these studies assessed impacts of the relaxation of social restriction after vaccination in the UK,<sup>15,16</sup> and one study assessed impacts of vaccination on hospital admissions,<sup>17</sup> but covered a shorter time horizon and did not consider waning of immunity. Another study of SARS-CoV-2 vaccination in the UK focused on economic evaluations.<sup>17</sup> There have been some published modelling studies of vaccination against COVID-19 in other countries. For example, a modelling study examined the nation-wide vaccination and returning to normal life in the United States of America (USA), finding that vaccination alone was insufficient and NPI measures were still required.<sup>18</sup>

The protection of naturally acquired or vaccine-induced immune responses may be attributable to infection protection, disease reduction, and reinfectivity reduction.<sup>19</sup> Studies of diseases caused by other human coronaviruses (HCoVs) indicated that infection protection immunity is likely to be short-lived, while disease reduction and reinfectivity reduction are likely long lasting.<sup>20</sup> We are not aware of

1  
2 modelling studies that considered these important immunity characteristics in the evaluation of  
3 national mass vaccination programmes against COVID-19 epidemics. Therefore, we conducted a  
4 modelling study to investigate possible impacts of different types of naturally acquired and vaccine-  
5 induced immunity on future dynamics of SARS-CoV-2 transmission in England.  
6  
7  
8  
9  
10

## 11 **METHODS**

### 12 **Model structure**

13  
14  
15 This is a deterministic, compartmental, discrete-time (day) population dynamic model, implemented  
16 with computational language R.<sup>21</sup> The population are classified into categories by sex, age (5-year age  
17 bands for age <10 years, and 10-year age bands for age ≥10 years), and COVID-19 infection status  
18 (figure 1). The main infection compartments include susceptible, exposed, infectious, recovered, and  
19 vaccinated. Here “exposed” refers to a pre-infectious status of infected individuals. Infected  
20 individuals are classified as asymptomatic or symptomatic, and symptomatic individuals are classified  
21 as not being isolated, self-isolated, and hospitalised. We assume that hospitalised patients are  
22 effectively isolated and no longer able to transmit the virus to the general population, but patients  
23 who self-isolate at home may transmit virus to household contacts. The recovered and effectively  
24 vaccinated are protected from reinfection, but they may be reinfected if the immunity is short-lived.  
25  
26  
27  
28  
29  
30  
31  
32  
33

### 34 **Parameters and data sources**

35  
36 Details on the model’s structure (appendix figure 1), parameters, data sources (appendix table 1),  
37 and mathematical equations are available in Supplementary files. Initial parameter values were  
38 estimated based on a review of relevant literature, and key parameter estimates were calibrated so  
39 that the simulated numbers of COVID-19 deaths, hospitalised patients, and infected individuals were  
40 as similar as possible to historically reported data from March 2020 to June 2021 in England.<sup>6</sup>  
41  
42  
43  
44

45 We obtained population demographic statistics in England from the Office for National Statistics,<sup>22</sup>  
46 and the whole population is assumed to be susceptible to SARS-CoV-2 infection at the beginning of  
47 2020. We assume incubation periods, infectious periods, days of hospital stay, and days of deaths  
48 after being infected, to be gamma distributed (appendix table 1 in supplementary files).<sup>10 23 24</sup> Age  
49 specific case fatality rates and hospitalisation rates of symptomatic cases were based on a study by  
50 Verity et al.<sup>24</sup> Average sex-and-age-specific rates of all-cause deaths from 2015 to 2019 in England<sup>22</sup>  
51 are applied to people who are not infected with or recovered from COVID-19. We assumed that the  
52 number of births equals to the number of deaths each day, and did not consider the influence of  
53 population migration. We adjusted the number of individuals belonging to each age group at the  
54 beginning of a year since 2021, by shifting a proportion of them to the adjacent higher age group.  
55  
56  
57  
58  
59  
60

1  
2 Effects of NPI measures, including restrictions on social activities, contact tracing and testing, were  
3 materialised by changes in transmission risk per contact between a susceptible and an infectious  
4 individual,<sup>25</sup> and average numbers of contacts of the general population (appendix table 2 in  
5 supplementary files). We estimate that the transmission risk per contact between infectious and  
6 susceptible individuals was reduced by 30%, from 0.094 before the implementation of any NPIs to  
7 0.066 by March 15, 2020 after implementing basic NPI measures. Because of the new virus variants,<sup>26</sup>  
8 the average transmission risk per contact was increased to 0.077 by the end of 2020, and 0.081 since  
9 June 2021. We assume that, since September 2021, the transmission risk per contact is 10% higher in  
10 September, October, March and April, and 20% higher in the winter months of November,  
11 December, January and February, compared with the risk in summer months from May to August.  
12 We do not use the reproduction number as an input parameter, but derived the basic and effective  
13 reproduction numbers based on model's transmission parameters (equation 55 in Supplementary  
14 files).<sup>12 25</sup>

15  
16 The sex-and-age-specific numbers of daily contacts per person were based on the UK data from a  
17 study of European countries.<sup>27</sup> We consider only the daily contacts of the general population and  
18 household contacts of individuals self-isolated at home. We estimated that the lockdown measures  
19 from 24 March 2020 reduced general population contacts by 60-85%, although household contacts  
20 were unchanged. The NPI measures were relaxed or strengthened over time, which were reflected in  
21 the assumed social contacts and transmission risk (Supplementary files). Social contacts in England  
22 since 19 July 2021 are return to normal as before the pandemic in England, although some basic  
23 hygienic measures would be maintained.

### 24 **Vaccination and projection scenarios**

25  
26 Vaccination of prioritised individuals began from 8 December 2020 in England.<sup>28</sup> The Joint Committee  
27 on Vaccination and Immunisation (JCVI) in the UK previously recommended COVID-19 vaccination of  
28 individuals aged  $\geq 18$ , and also recommended vaccination of young people aged 16-17 years old on 4  
29 August 2021.<sup>29</sup> The vaccine uptake rate in adults aged  $\geq 18$  was 88.5% for dose-1 and 72.1% for dose-  
30 2 by 30 July 2021,<sup>6</sup> and the coverage with two does was  $>90\%$  in adults aged  $\geq 65$ , 80-90% in those  
31 aged 50-64, and around 60% in those aged 40-49.<sup>30</sup> In this study, the mass vaccination is modelled as  
32 an age-based phase approach, starting from people aged  $\geq 70$ , followed by individuals aged 60-69, 50-  
33 59, 30-49, and then those aged 16-29 years old. We assume that the mass vaccination starts from 1  
34 January 2021, and the maximum number of individuals vaccinated daily is 180,000, to matched with  
35 numbers of vaccinated individuals according to the official statistics. In the main analysis, we assume  
36 that the uptake rate is 75%, 80%, 85% and 90%, respectively, in adults aged 16-29, 30-39, 40-49, and  
37  $\geq 50$  years old. Because of uncertain coverage of vaccination in younger people, we conducted  
38  
39  
40  
41  
42  
43  
44  
45  
46  
47  
48  
49  
50  
51  
52  
53  
54  
55  
56  
57  
58  
59  
60

1  
2 sensitivity analyses under scenarios with lower (60%, 70%, and 80%) and higher (80%, 85%, and 90%)  
3 coverage of vaccination in people aged 16-29, 30-39, and 40-49 years old, respectively.  
4

5  
6 Both Pfizer-BioNTec and AstraZeneca vaccines are 2-dose regimens, and the policy in the UK has  
7 been to initially provide the first dose to as many adults as possible. Data from clinical trials indicated  
8 that the short-term vaccine efficacy after the first dose of the Pfizer-BioNTech and the AstraZeneca  
9 vaccine is about 90% and 70%, respectively.<sup>3</sup> Public Health England (PHE) in July 2021 estimated that  
10 the efficacy was 55-70% after the first dose, and 70-85% or 85-95% after the second dose.<sup>30</sup> In this  
11 study, we assume that the overall vaccine efficacy is 62.5% after the first dose and 85% after the  
12 second dose. The protection effects start 14 days after the first dose vaccination, and the interval  
13 between the first and second dose is nine weeks. The overall vaccine efficacy after the second dose  
14 may be lower than 85.0% due to new variants of SARS-CoV-2 virus. Therefore, we assume a scenario  
15 in which the vaccine efficacy is reduced by new viral variants, to be 44.0% after the first dose and  
16 62.5% after the second dose, during 2022-2024.  
17  
18

19  
20 The reduction in symptomatic cases in vaccinated individuals may be due to induced antibodies in  
21 susceptible individuals (infection protection), or a reduction in symptomatic cases among infected  
22 individuals (disease reduction), or a combination of both. There are many different possible  
23 combinations of infection protection and disease reduction for a given overall vaccine efficacy in  
24 reducing symptomatic cases (appendix figure 2 in supplementary files). We assume that vaccine  
25 efficacy for reducing symptomatic cases is equally attributable to infection reduction and disease  
26 reduction in the main projections. For vaccines with 62.5% and 85.0% overall efficacy, the equal  
27 partial efficacy for the infection protection and for disease reduction is 38.8% and 61.3%,  
28 respectively (see Supplementary files for details).  
29  
30

31  
32 Immune responses against COVID-19 infection, either naturally acquired from prior infection or  
33 vaccine-induced, may reduce individuals' susceptibility to infection (infection protection or sterilising  
34 immunity), reduce pathology so that disease is less severe after being infected (disease reduction  
35 immunity), and reduce infectivity of those who are reinfected after the waning of immunity  
36 (reinfectivity reduction immunity).<sup>19</sup> According to immunological characteristics of other HCoVs,  
37 infection protection immunity may wane after a short period, while disease protection and  
38 reinfectivity reduction immunity are likely longer lasting.<sup>20</sup> For example, antibodies against SARS-  
39 CoV-1 virus in recovered patients was no longer detectable after 2-3 years, while specific memory T  
40 cells remained detected after 11 years.<sup>31</sup> Therefore, we assume that the disease reduction and  
41 reinfectivity reduction immunity are long lasting (>4 years).<sup>20</sup> We assume that naturally acquired  
42 sterilising immunity lasts for 365 or 730 days, and vaccine-induced sterilising immunity lasts for 182  
43 or 365 days. Available evidence indicated that the viral loads and the duration of virus shedding in  
44 the infected individuals after vaccination were considerably reduced, compared with unvaccinated  
45  
46  
47  
48  
49  
50  
51  
52  
53  
54  
55  
56  
57  
58  
59  
60

1  
2 individuals.<sup>32 33</sup> Public Health England in July 2021 estimated that the reinfectivity was reduced by 35-  
3 50% after the first dose of vaccines,<sup>30</sup> although it is possible that the reduction in reinfectivity may be  
4 larger than 35-50% after the second dose of vaccines. More recent studies reported that fully  
5 vaccinated individuals who were infected were between 41% and 78% less likely to transmit the virus  
6 to unvaccinated individuals.<sup>34</sup> In this study, we assume that reinfectivity after waning of sterilising  
7 immunity is reduced by 30%, 45% or 60%. We also assume that the infectivity of ineffectively  
8 vaccinated individuals is the same as recovered individuals whose sterilising immunity has waned,  
9 and vaccination of individuals recovered from natural infection boosts their naturally acquired  
10 immunity.

11  
12 We considered scenarios with different frequency of revaccination programmes, including a single  
13 vaccination programme, multiple (2-4) annual revaccinations, and revaccination programmes with  
14 different frequency and time intervals. The main characteristics of the simulated scenarios are  
15 summarised in appendix table 3 in supplementary files.

16  
17 We run the model and calibrate key transmission parameters by visually comparing estimated  
18 numbers of daily COVID-19 deaths, and hospitalised patients, with official records from 1 January  
19 2020 to 30 June 2021 in England.<sup>6</sup> We used estimates of transmission parameters by the end of June  
20 2021 to project COVID-19 deaths from 2021 to 2024, under various scenarios of vaccine efficacy,  
21 durability and protection characteristics of naturally acquired and vaccine-induced immunity. The  
22 number of deaths from SARS-CoV-2 infections is the main endpoint in this study.

### 23 24 25 **Patient and public involvement**

26  
27 No patients and the public were involved in this literature and secondary data based, computational  
28 modelling study.

## 29 30 31 **RESULTS**

32  
33 Our derived basic reproduction number ( $R_0$ ) was 3.68 at the initial stage of the COVID-19 epidemic in  
34 England. After implementing NPI and lockdown measures, the effective reproduction value ( $R_t$ ) was  
35 reduced to 0.66 after 24 March 2020. Thereafter, the  $R_t$  values fluctuated along with changing NPI  
36 policies, and our estimated  $R$  values were within the ranges reported in England (Appendix figure 3 in  
37 Supplementary files).<sup>35</sup> The estimated prevalence of SARS-CoV-2 infection (appendix figure 4), the  
38 number of hospitalised COVID-19 patients (appendix figure 5), and the estimated daily deaths from  
39 COVID-19 (appendix figure 6) are well matched with the reported data from March 2020 to June  
40 2021 in England (Supplementary files).

## Vaccine efficacy, immunity durability, and reinfectivity

Figure 2 shows the impacts of partial vaccine efficacy regarding disease reduction relative to infection protection, durability of immunity, and reinfectivity, given the same overall vaccine efficacy in reducing symptomatic cases. There are three general inferences. As expected, the number of COVID-19 deaths is smaller following a greater reduction in reinfectivity (figure 2A, 2B, 2C). Second, a greater reduction in reinfectivity makes the durability of immunity less influential, if a vaccine is efficacious for infection protection (figure 2c). Third, the impacts of partial efficacy of infection protection relative to disease reduction by a vaccine is substantial when the duration of immunity is short-lasting. A combination of a shorter duration of immunity and smaller reduction in the reinfectivity makes the disease reduction efficacy more beneficial (figure 2A, 2B).

## Population susceptibility and COVID-19 outbreaks

Changes in the prevalence of susceptible individuals and daily peaks of COVID-19 deaths in England during 2020 and 2024 are shown in figure 3, under assumptions of 85% vaccine efficacy after the second dose, 45% reduction in reinfectivity after waning of sterilising immunity, and different durations of sterilising immunity.

The overall prevalence of susceptible individuals is reduced to around 25% by August 2021, after a single wave of mass vaccination starting from January 2021. It starts to increase to above 70% by December 2022, if the duration of natural and vaccine-induced immunity is 730 and 365 days, respectively (figure 3A). The raised prevalence of susceptible individuals leads to an outbreak with a high peak ( $n=627$ ) of daily COVID-19 deaths in May 2023. The prevalence of the susceptible is slightly reduced by the natural infection during the outbreak, then increases again due to waning of immunity. Two waves of repeated annual revaccination programmes delay the new outbreak, with a peak of daily COVID-19 deaths ( $n=731$ ) in May 2024 (figure 3B). Four repeated waves of annual revaccination programmes almost prevent any new outbreaks before the end of 2024, with no more than 50 daily COVID-19 deaths during 2022-2024 (figure 3C).

If the natural and vaccine immunity lasts only 365 and 182 days, respectively, the annual mass vaccination programmes are insufficient to sustain a constantly low prevalence of the susceptible, and the prevalence of the susceptible fluctuates up and down biannually (figure 3D-F). A single wave of mass vaccination is followed with multiple high peaks of daily COVID-19 deaths (figure 3D), and annual revaccination programmes result in corresponding changes in the prevalence of susceptible individuals and daily COVID-19 deaths (figure 3E, 3F). With four annual revaccination programmes, there are two flattened peaks of daily deaths from COVID-19 in March 2022 ( $n=151$ ) and April 2024 ( $n=168$ ), respectively (figure 3E).

## Projected COVID-19 deaths under various scenarios

The projected total numbers and daily peaks of COVID-19 deaths during 2020-2024, under all assumed scenarios, are available in supplementary table 1 and supplementary table 2. If there is no waning of immunity (i.e., immunity duration >4 years) and high vaccine efficacy, a single vaccination programme may prevent COVID-19 outbreaks during 2022-2024, after returning to normality (supplementary table 1). Otherwise, repeated vaccination programmes are required to prevent further large outbreaks with high peaks of daily deaths from COVID-19.

Table 1 shows results of annual vaccination programmes under selected scenarios. With annual revaccinations under optimistic scenarios, the cumulative number of COVID-19 deaths is estimated to be from 130,000 to 150,000 by the end of 2024. However, the total number of COVID-19 deaths may be up to 431,000 by the end of 2024, under scenarios with compromised long-term vaccine efficacy (62.5%), short duration of natural and vaccine immunity (365/182 days), and small reduction in reinfectivity (30%) (table 1).

Results of revaccination programmes with different frequency (from two to six revaccinations during 2021-2024) are shown in figure 4 and supplementary table 2. Revaccination programmes every two years can prevent outbreaks during 2022-2024 in a scenario with high vaccine efficacy (85%), large reduction in reinfectivity (60%), and long duration of immunity (730/365 days). Under assumed scenarios, more frequent revaccinations are associated with smaller total numbers and lower peaks of daily deaths from COVID-19 (supplementary table 2). As expected, frequent revaccinations are particularly important when the immunity response is short-lived (figure 4).

Results of scenarios with lower or higher vaccination coverage in younger adults are presented in supplementary table 3. As expected, lower coverage of vaccination programmes is associated with larger number of total COVID-19 deaths. For example, the projected cumulative number of COVID-19 deaths by the end of 2024 is around 195,000, under a scenario (labelled as 'A2c4' in supplementary table 3) of annual revaccination, 85% vaccine efficacy, short duration of immunity (365/182 days), and 75-90% vaccination coverage. The number of COVID-19 deaths is reduced to around 183,000 in scenario (A2c4y) with 80-90% coverage, and increased to around 210,000 in scenario (A2c4x) with 60-90% coverage (supplementary table 3).

## DISCUSSIONS

Mass immunisation using efficacious vaccines may enable society safely to return to normality. Repeated vaccination programmes are very likely to be required to prevent further COVID-19 outbreaks, depending on vaccine efficacy, the durability and characteristics of different types of

1  
2 immune response to naturally acquired and vaccine-induced immune responses. Evidence on  
3 diseases caused by other common HCoVs indicated that the infection protection immunity may be  
4 short-lived, but the disease reduction and the reinfectivity reduction immunity are likely to be longer  
5 lasting.<sup>20</sup> We found that, if vaccine efficacy is high (85%) and reinfectivity is greatly reduced (e.g., by  
6 60%), repeated annual mass vaccination programmes prevent further COVID-19 large outbreaks,  
7 even if the vaccine induced sterilising immunity lasts only 182 days. Under optimistic scenarios, the  
8 cumulative number of COVID-19 deaths during 2020-2024 in England is estimated to be from  
9 130,000 to 150,000. If both the natural and vaccine immunity are short-lived (365 and 180 days,  
10 respectively), and reinfectivity is reduced only by 45% or 30%, further COVID-19 outbreaks cannot be  
11 prevented by annual vaccination programmes. The total number of COVID-19 deaths is estimated to  
12 be around 431,000 by the end of 2024, under a pessimistic scenario with low long-term vaccine  
13 efficacy (62.5%), short duration of vaccine immunity (365/182 days), and small reduction in  
14 reinfectivity (30%) (Table 1).

15  
16  
17  
18  
19  
20  
21  
22  
23  
24  
25  
26  
27  
28  
29  
30  
31  
32  
33  
34  
35  
36  
37  
38  
39  
40  
41  
42  
43  
44  
45  
46  
47  
48  
49  
50  
51  
52  
53  
54  
55  
56  
57  
58  
59  
60

When natural and vaccine-induced immune response against SARS-CoV-2 infection is short-lived, more frequent revaccinations (e.g., every 8-10 months) can reduce deaths from COVID-19, compared with less frequent or annual revaccination programmes. However, frequent revaccination may not always be feasible, due to the availability of vaccine doses, resource restrictions, organisational complexity, and possibly decreased compliance by the public.

Compared with previous modelling studies,<sup>14-17</sup> our study has considered the durability of naturally acquired and vaccine induced immunity, over a five year period from 2020 to 2024, and compared a wider range of plausible scenarios. We explicitly investigated the impacts of different types of immune responses to SARS-CoV-2 infection and vaccines on the COVID-19 epidemic in a country. Findings from our study will improve the understanding of key immunological parameters relevant to future changes in SARS-CoV-2 transmission dynamics and vaccination strategies.

Evidence from randomised controlled trials showed that vaccines against SARS-CoV-2 are efficacious in reducing symptomatic COVID-19 cases.<sup>4</sup> The reduction in symptomatic cases in the vaccine group may be attributable to infection protection or disease reduction. Available evidence showed that vaccines reduced the risk of SARS-CoV-2 virus infection in vaccinated individuals,<sup>36</sup> and household members of vaccinated healthcare workers has a lower risk of COVID-19 infection than those of unvaccinated.<sup>37</sup> In this study, we explored the impacts of different proportions of a vaccine's infection protection efficacy and disease reduction efficacy. Different combinations of the two efficacy components have impacts on the transmission dynamics, depending on the duration of immune response and reinfectivity after waning of sterilising immunity. Because of lack of data, we assumed that vaccine efficacy is equally attributable to the infection and disease reduction immunity.



1  
2 Vaccines that are efficacious against current SARS-CoV-2 virus may become less efficacious against  
3 new emerging variants.<sup>8</sup> Therefore, we modelled a range of overall long-term vaccine efficacy (62.5%  
4 vs. 85.0%). Although the vaccine efficacy might be reduced by new viral variants, it is also possible  
5 that repeated vaccinations may boost immune responses. We assume that there will be no  
6 important safety issues for vaccines licensed to use. We focused on the impacts and interactions of  
7 vaccine efficacy, different types of immune response to SARS-CoV-2, and assumed no more  
8 restrictions by NPI measures after return to normality in England from 19 July 2021. However, the  
9 pessimistic scenarios in our analyses may not be allowed to happen in the real world, as NPI  
10 (including lockdown) measures may have to be introduced again if the vaccination programmes are  
11 insufficient to avoid the new outbreaks of COVID-19.

12  
13 This is a deterministic simulation model, and uncertainty in estimated parameters may have not  
14 been fully accommodated. For simplicity, stochastic uncertainty, to quantify confidence intervals  
15 around the model's outputs, was not modelled. However, the model has been verified based on  
16 historically observed outcome data in England, and a large number of projection scenarios are  
17 explored to explicitly answer "what-if" questions. Although many uncertainties remain, including  
18 durability and types of naturally acquired and vaccine-induced immunity, our model can be updated  
19 to assess vaccination strategies, as new evidence emerges.

## 20 21 22 23 24 25 26 27 28 29 30 31 32 **Conclusions**

33 Under optimistic scenarios, mass immunisation using efficacious vaccines may enable society safely  
34 to return to normality. However, under plausible scenarios with low vaccine efficacy and short  
35 durability of immunity, COVID-19 could continue to cause recurrent waves of severe morbidity and  
36 mortality despite frequent vaccinations, and necessitate stringent NPI restrictions. It is crucial to  
37 monitor the vaccination effects in the real world, and to better understand characteristics of  
38 naturally acquired and vaccine induced immunity against SARS-CoV-2.

## 39 40 41 42 43 44 45 46 47 48 49 **ACKNOWLEDGEMENT**

50  
51 **Acknowledgement:** We used UEA high performance computing cluster for this study, and received  
52 support from the Research and Specialist Computing Service, University of East Anglia.

53  
54  
55 **Contributors:** FS designed, developed the model, retrieved data for estimating parameters,  
56 conducted computational calculations, and prepared the draft manuscript. MOB provided  
57 methodological support, helped interpret results and critically revised the draft manuscript. FS  
58  
59  
60

1  
2 accepts full responsibility for the work and/or the conduct of the study, had access to the data, and  
3 controlled the decision to publish.  
4

5  
6 **Competing interests:** No competing interests declared.  
7

8 **Funding:** There are no specific funding received for this study  
9

10 **Data sharing statement:** All data relevant to the study are included in the article or uploaded as  
11 online supplementary information.  
12

13 **Patient consent for publication:** Not required.  
14

15 **Ethics approval statement:** Not applicable. No human participants involved in this modelling study  
16 using data from published or openly accessible sources.  
17  
18  
19

## 20 21 22 23 **FIGURE LEGENDS:**

24  
25  
26 **Figure 1: Modelling COVID-19 epidemics in England - main compartments and transitions across**  
27 **status.** See supplementary files for details on definitions of transition parameters  
28

29  
30  
31 **Figure 2. Projected numbers of COVID-19 deaths with different combinations of partial efficacy of**  
32 **infection and disease protection, immunity duration, and reduction in reinfectivity.**  
33

34 The cumulative number of COVID-19 deaths by the end of 2024, after four repeated annual  
35 vaccinations of 90% individuals aged  $\geq 18$  during 2021-2024. The overall vaccine efficacy was 85%;  
36 "0.00/0.85" refers to all vaccine efficacy attributable to disease protection, "0.61/0.61" refers to  
37 equal infection and disease protection, "0.85/0.00" refers to all efficacy attributable to infection  
38 protection. Immunity duration: "365/182" refers to 365 days and 182 days, "and "730/365" refers to  
39 730 and 365 days, respectively, natural and vaccine immunity. Figure 2A, 2B and 2C shows results  
40 under the assumption of 30%, 45% and 60% reduction in reinfectivity.  
41  
42  
43  
44  
45

46 **Figure 3. Projected peaks of daily COVID-19 deaths and the prevalence of susceptible individuals**  
47 **during 2020-2024 under scenarios with different immunity durability and vaccine strategies.** We  
48 assume 85% long-term vaccine efficacy; 75-90% coverage of individuals aged  $\geq 16$ ; 45% reduction in  
49 reinfectivity, longer (730/365 days, fig 3A-C) or shorter lasting (365/182 days, fig 3D-F)  
50 natural/vaccine immunity. Results were after a single vaccination (fig 3A and 3D), two annual  
51 vaccination programmes (fig 3B and 3E), and four annual vaccination programmes (Figure 3C and 3F).  
52  
53  
54  
55

56 **Figure 4. Results of revaccination programmes with different frequency.** Vaccine efficacy is 85.0% in  
57 fig 4A/C and 62.5% in fig 4B/D, respectively. Duration of immunity lasts 730/365 in fig 4A/B and  
58 365/182 days in fig 4C/D, respectively.  
59  
60

1  
2  
3  
4 **ONLINE SUPPLEMENTARY MATERIALS**  
5

6 **Supplementary Files:** Model structure, data sources, model parameters, and mathematical equations  
7

8 **Supplementary Tables:** Additional results of relevant scenarios  
9  
10  
11  
12  
13  
14  
15  
16  
17  
18  
19  
20  
21  
22  
23  
24  
25  
26  
27  
28  
29  
30  
31  
32  
33  
34  
35  
36  
37  
38  
39  
40  
41  
42  
43  
44  
45  
46  
47  
48  
49  
50  
51  
52  
53  
54  
55  
56  
57  
58  
59  
60

For peer review only

## REFERENCES

1. Islam N, Sharp SJ, Chowell G, et al. Physical distancing interventions and incidence of coronavirus disease 2019: natural experiment in 149 countries. *BMJ* 2020;370:m2743. doi: 10.1136/bmj.m2743 [published Online First: 2020/07/17].
2. Krammer F. SARS-CoV-2 vaccines in development. *Nature* 2020;586(7830):516-27. doi: 10.1038/s41586-020-2798-3.
3. Department of Health and Social Care. Optimising the covid-19 vaccination programme for maximum short-term impact. 2021 [Available from: <https://www.gov.uk/government/publications/prioritising-the-first-covid-19-vaccine-dose-jcvi-statement/optimising-the-covid-19-vaccination-programme-for-maximum-short-term-impact>].
4. Mallapaty S. Can COVID vaccines stop transmission? Scientists race to find answers. *Nature* 2021 doi: 10.1038/d41586-021-00450-z [published Online First: 2021/02/21].
5. Bingham K. The UK Government's Vaccine Taskforce: strategy for protecting the UK and the world. *Lancet* 2020 doi: 10.1016/s0140-6736(20)32175-9 [published Online First: 2020/10/31].
6. GOV.UK. Coronavirus (COVID-19) in the UK 2021 [Available from: <https://coronavirus.data.gov.uk/> accessed 31 July 2021].
7. Gov.uk. Coronavirus (COVID-19): Guidance and support. 2021 [Available from: <https://www.gov.uk/coronavirus> accessed 30 July 2021].
8. Mahase E. Covid-19: Where are we on vaccines and variants? *BMJ* 2021;372:n597. doi: 10.1136/bmj.n597 [published Online First: 2021/03/04].
9. Sanyaolu A, Okorie C, Marinkovic A, et al. The emerging SARS-CoV-2 variants of concern. *Therapeutic Advances in Infectious Disease* 2021;8:20499361211024372. doi: 10.1177/20499361211024372 [published Online First: 2021/07/03].
10. Ferguson N, Laydon D, Nedjati-Gilani G, et al. Impact of non-pharmaceutical interventions (NPIs) to reduce COVID-19 mortality and healthcare demand.: Imperial College COVID-19 Response Team., 2020.
11. Davies NG, Kucharski AJ, Eggo RM, et al. Effects of non-pharmaceutical interventions on COVID-19 cases, deaths, and demand for hospital services in the UK: a modelling study. *The Lancet Public Health* 2020;5(7):e375-e85. doi: 10.1016/s2468-2667(20)30133-x [published Online First: 2020/06/06].

- 1  
2 12. Giordano G, Blanchini F, Bruno R, et al. Modelling the COVID-19 epidemic and implementation of  
3 population-wide interventions in Italy. *Nature Medicine* 2020;26(6):855-60. doi: 10.1038/s41591-  
4 020-0883-7 [published Online First: 2020/04/24].  
5  
6  
7 13. Khajanchi S, Sarkar K, Mondal J, et al. Mathematical modeling of the COVID-19 pandemic with  
8 intervention strategies. *Results in Physics* 2021;25:104285. doi: 10.1016/j.rinp.2021.104285  
9 [published Online First: 2021/05/13].  
10  
11  
12 14. Cook TM, Roberts JV. Impact of vaccination by priority group on UK deaths, hospital admissions  
13 and intensive care admissions from COVID-19. *Anaesthesia* 2021;76(5):608-16. doi:  
14 10.1111/anae.15442 [published Online First: 2021/02/12].  
15  
16  
17 15. Miles DK, Heald AH, Stedman M. How fast should social restrictions be eased in England as  
18 COVID-19 vaccinations are rolled out? *International Journal of Clinical Practice* 2021:e14191. doi:  
19 10.1111/ijcp.14191 [published Online First: 2021/04/01].  
20  
21  
22 16. Moore S, Hill EM, Tildesley MJ, et al. Vaccination and non-pharmaceutical interventions for  
23 COVID-19: a mathematical modelling study. *Lancet Infect Dis* 2021 doi: 10.1016/s1473-  
24 3099(21)00143-2 [published Online First: 2021/03/22].  
25  
26  
27 17. Sandmann FG, Davies NG, Vassall A, et al. The potential health and economic value of SARS-CoV-2  
28 vaccination alongside physical distancing in the UK: a transmission model-based future scenario  
29 analysis and economic evaluation. *Lancet Infect Dis* 2021 doi: 10.1016/s1473-3099(21)00079-7  
30 [published Online First: 2021/03/22].  
31  
32  
33 18. Li J, Giabbanelli P. Returning to a Normal Life via COVID-19 Vaccines in the United States: A Large-  
34 scale Agent-Based Simulation Study. *JMIR Medical Informatics* 2021;9(4):e27419. doi: 10.2196/27419  
35 [published Online First: 2021/04/20].  
36  
37  
38 19. Hodgson SH, Mansatta K, Mallett G, et al. What defines an efficacious COVID-19 vaccine? A  
39 review of the challenges assessing the clinical efficacy of vaccines against SARS-CoV-2. *Lancet Infect*  
40 *Dis* 2020 doi: 10.1016/s1473-3099(20)30773-8 [published Online First: 2020/10/31].  
41  
42  
43 20. Lavine JS, Bjornstad ON, Antia R. Immunological characteristics govern the transition of COVID-19  
44 to endemicity. *Science (New York, NY)* 2021;371(6530):741-45. doi: 10.1126/science.abe6522  
45 [published Online First: 2021/01/14].  
46  
47  
48 21. R Core Team. R: A language and environment for statistical computing. R Foundation for  
49 Statistical Computing, Vienna, Austria. URL <https://www.R-project.org/>. 2019.  
50  
51  
52 22. Office for National Statistics. Dataset: 2018-based National population projections table of  
53 contents. Available from: <https://www.ons.gov.uk/peoplepopulationandcommunity/>.  
54  
55  
56  
57  
58  
59  
60

- 1  
2 23. Zhang J, Litvinova M, Wang W, et al. Evolving epidemiology and transmission dynamics of  
3 coronavirus disease 2019 outside Hubei province, China: a descriptive and modelling study. *Lancet*  
4 *Infect Dis* 2020 doi: 10.1016/s1473-3099(20)30230-9 [published Online First: 2020/04/06]  
5  
6  
7 24. Verity R, Okell LC, Dorigatti I, et al. Estimates of the severity of coronavirus disease 2019: a  
8 model-based analysis. *Lancet Infect Dis* 2020 doi: 10.1016/s1473-3099(20)30243-7 [published Online  
9 First: 2020/04/03]  
10  
11  
12  
13 25. Rock K, Brand S, Moir J, et al. Dynamics of infectious diseases. *Rep Prog Phys* 2014;77(2):026602.  
14 doi: 10.1088/0034-4885/77/2/026602 [published Online First: 2014/01/22]  
15  
16  
17 26. Mahase E. Covid-19: What have we learnt about the new variant in the UK? *BMJ*  
18 2020;371:m4944. doi: 10.1136/bmj.m4944 [published Online First: 2020/12/29]  
19  
20  
21 27. Mossong J, Hens N, Jit M, et al. Social contacts and mixing patterns relevant to the spread of  
22 infectious diseases. *PLoS Med* 2008;5(3):e74. doi: 10.1371/journal.pmed.0050074 [published Online  
23 First: 2008/03/28].  
24  
25  
26  
27 28. Mahase E. Covid-19: UK approves Pfizer and BioNTech vaccine with rollout due to start next  
28 week. 2020; *BMJ* 371:m4714. doi: 10.1136/bmj.m4714.  
29  
30  
31 29. Department of Health & Social Care JCVI statement, August 2021: COVID-19 vaccination of  
32 children and young people aged 12 to 17 years.: Department of Health & Social Care 2021. Available  
33 from: <https://www.gov.uk/government/organisations/department-of-health-and-social-care>.  
34  
35  
36  
37 30. PHE. COVID-19 vaccine surveillance report Week 28: Public Health England 2021.  
38  
39  
40 31. Le Bert N, Tan AT, Kunasegaran K, et al. SARS-CoV-2-specific T cell immunity in cases of COVID-19  
41 and SARS, and uninfected controls. *Nature* 2020;584(7821):457-62. doi: 10.1038/s41586-020-2550-z  
42 [published Online First: 2020/07/16].  
43  
44  
45 32. Levine-Tiefenbrun M, Yelin I, Katz R, et al. Decreased SARS-CoV-2 viral load following vaccination.  
46 2021:2021.02.06.21251283. doi: 10.1101/2021.02.06.21251283 %J medRxiv.  
47  
48  
49 33. Emary KRW, Golubchik T, Aley PK, et al. Efficacy of ChAdOx1 nCoV-19 (AZD1222) Vaccine Against  
50 SARS-CoV-2 VOC 202012/01 (B.1.1.7). SSRN [Preprint]. 2021. DOI: 10.2139/ssrn.3779160. Available  
51 at: [https://papers.ssrn.com/sol3/papers.cfm?abstract\\_id=3779160](https://papers.ssrn.com/sol3/papers.cfm?abstract_id=3779160) 2021.  
52  
53  
54 34. Mallapaty S. COVID vaccines slash viral spread - but Delta is an unknown. *Nature* 2021 doi:  
55 10.1038/d41586-021-02054-z [published Online First: 2021/07/30].  
56  
57  
58 35. Government Office for Science and Scientific Advisory Group for Emergencies. Guidance: The R  
59 number and growth rate in the UK. From Government Office for Science and Scientific Advisory  
60

1  
2 Group for Emergencies. 2020 [updated Last updated 2 October 2020. Available from:  
3 <https://www.gov.uk/guidance/the-r-number-in-the-uk#contents> accessed 08/10/2020.  
4

5  
6 36. Hall VJ, Foulkes S, Charlett A, et al. SARS-CoV-2 infection rates of antibody-positive compared  
7 with antibody-negative health-care workers in England: a large, multicentre, prospective cohort  
8 study (SIREN). *Lancet* 2021;397(10283):1459-69. doi: 10.1016/s0140-6736(21)00675-9 [published  
9 Online First: 2021/04/13].  
10  
11

12  
13 37. Shah AS, Gribben C, Bishop J, et al. Effect of vaccination on transmission of COVID-19: an  
14 observational study in healthcare workers and their households. 2021:2021.03.11.21253275. doi:  
15 10.1101/2021.03.11.21253275 %J medRxiv.  
16  
17  
18  
19  
20  
21  
22  
23  
24  
25  
26  
27  
28  
29  
30  
31  
32  
33  
34  
35  
36  
37  
38  
39  
40  
41  
42  
43  
44  
45  
46  
47  
48  
49  
50  
51  
52  
53  
54  
55  
56  
57  
58  
59  
60

For peer review only

**Table 1. Projected total and daily peak COVID-19 deaths after annual vaccination programmes by 2024 in England**

| Scenario | Long-term vaccine efficacy | Reduction in reinfectivity | Immunity duration (day):<br>Natural /vaccine | Total COVID-19 deaths (2020-2024) | Daily peaks of COVID-19 deaths |      |      |
|----------|----------------------------|----------------------------|----------------------------------------------|-----------------------------------|--------------------------------|------|------|
|          |                            |                            |                                              |                                   | 2022                           | 2023 | 2024 |
| A1b4     | 85.0%                      | 60%                        | 730/365                                      | 127,550                           | 28                             | 0    | 0    |
| A2b4     | 85.0%                      | 45%                        | 730/365                                      | 134,421                           | 42                             | 0    | 36   |
| A3b4     | 85.0%                      | 30%                        | 730/365                                      | 152,926                           | 64                             | 4    | 131  |
| A1c4     | 85.0%                      | 60%                        | 365/182                                      | 148,093                           | 89                             | 2    | 7    |
| A2c4     | 85.0%                      | 45%                        | 365/182                                      | 194,661                           | 151                            | 55   | 168  |
| A3c4     | 85.0%                      | 30%                        | 365/182                                      | 229,664                           | 208                            | 145  | 96   |
| B1b4     | 62.5%                      | 60%                        | 730/365                                      | 143,233                           | 104                            | 0    | 0    |
| B2b4     | 62.5%                      | 45%                        | 730/365                                      | 179,002                           | 209                            | 0    | 224  |
| B3b4     | 62.5%                      | 30%                        | 730/365                                      | 233,075                           | 366                            | 3    | 384  |
| B1c4     | 62.5%                      | 60%                        | 365/182                                      | 198,684                           | 351                            | 2    | 47   |
| B2c4     | 62.5%                      | 45%                        | 365/182                                      | 350,016                           | 615                            | 537  | 886  |
| B3c4     | 62.5%                      | 30%                        | 365/182                                      | 430,219                           | 888                            | 616  | 1362 |

Notes to Table 1: Scenario labels are corresponding to those used in supplementary table 1. We assume annual vaccination covers 75-90% of individuals aged  $\geq 16$  years; the short-term vaccine efficacy is 62.5% after the first dose and 85% after the second dose, and the overall vaccine efficacy is equally attributable to the infection and disease protection. "Long-term vaccine efficacy" refers to vaccine efficacy in fully vaccinated after January 2022.



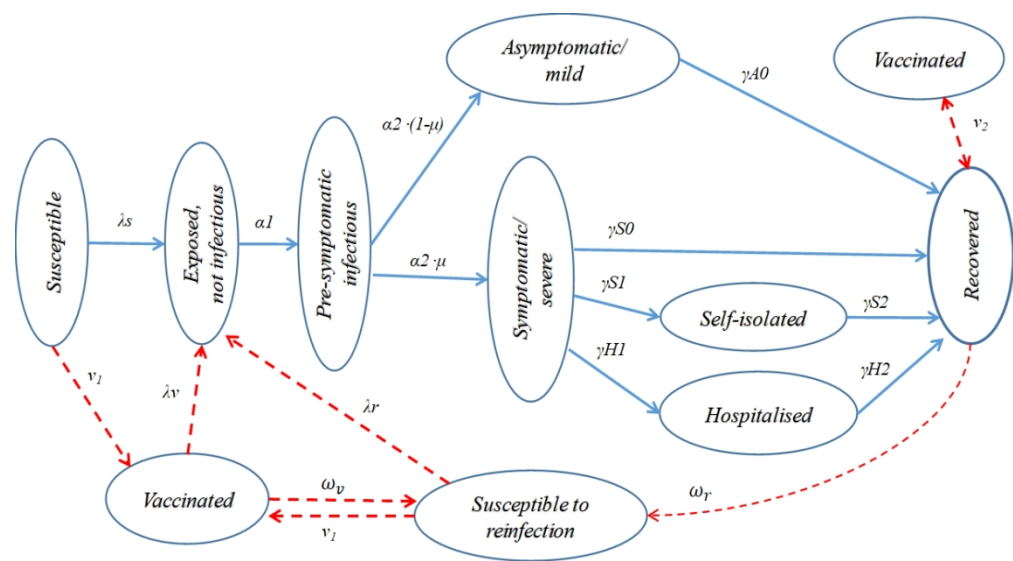

Figure 1: Modelling COVID-19 epidemics in England - main compartments and transitions across status. See supplementary files for details on definitions of transition parameters

324x177mm (96 x 96 DPI)

1  
2  
3  
4  
5  
6  
7  
8  
9  
10  
11  
12  
13  
14  
15  
16  
17  
18  
19  
20  
21  
22  
23  
24  
25  
26  
27  
28  
29  
30  
31  
32  
33  
34  
35  
36  
37  
38  
39  
40  
41  
42  
43  
44  
45  
46  
47  
48  
49  
50  
51  
52  
53  
54  
55  
56  
57  
58  
59  
60

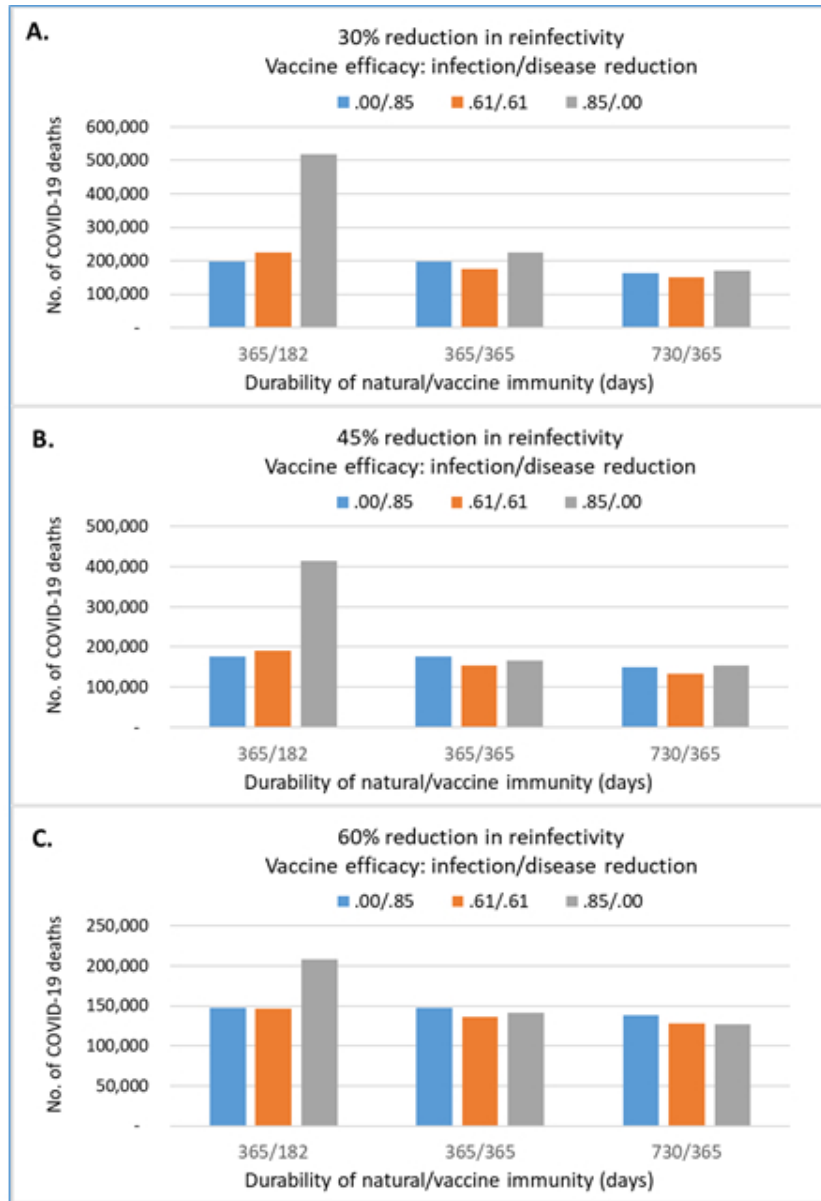

Figure 2. Projected numbers of COVID-19 deaths with different combinations of partial efficacy of infection and disease protection, immunity duration, and reduction in re infectivity. The cumulative number of COVID-19 deaths by the end of 2024, after four repeated annual vaccinations of 90% individuals aged  $\geq 18$  during 2021-2024. The overall vaccine efficacy was 85%; "0.00/0.85" refers to all vaccine efficacy attributable to disease protection, "0.61/0.61" refers to equal infection and disease protection, "0.85/0.00" refers to all efficacy attributable to infection protection. Immunity duration: "365/182" refers to 365 days and 182 days, "and "730/365" refers to 730 and 365 days, respectively, natural and vaccine immunity. Figure 2A, 2B and 2C shows results under the assumption of 30%, 45% and 60% reduction in re infectivity.

118x169mm (96 x 96 DPI)

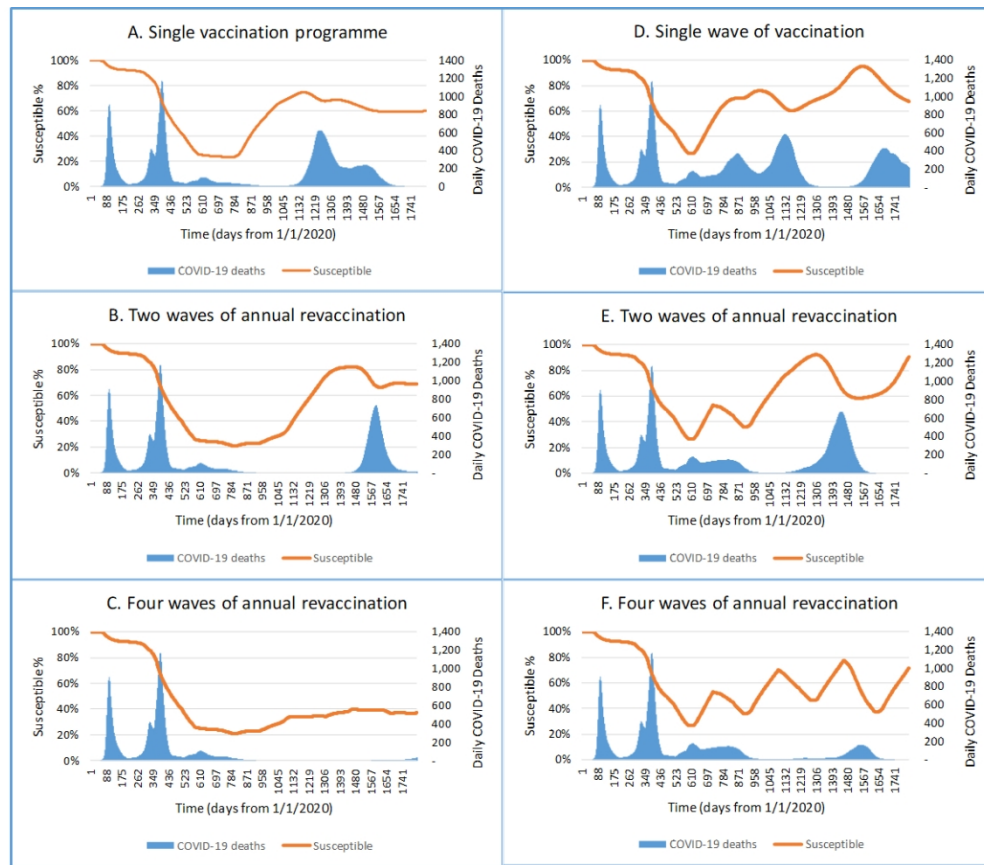

Figure 3. Projected peaks of daily COVID-19 deaths and the prevalence of susceptible individuals during 2020-2024 under scenarios with different immunity durability and vaccine strategies. We assume 85% long-term vaccine efficacy; 75-90% coverage of individuals aged  $\geq 16$ ; 45% reduction in reinfectivity, longer (730/365 days, fig 3A-C) or shorter lasting (365/182 days, fig 3D-F) natural/vaccine immunity. Results were after a single vaccination (fig 3A and 3D), two annual vaccination programmes (fig 3B and 3E), and four annual vaccination programmes (Figure 3C and 3F).

314x271mm (96 x 96 DPI)

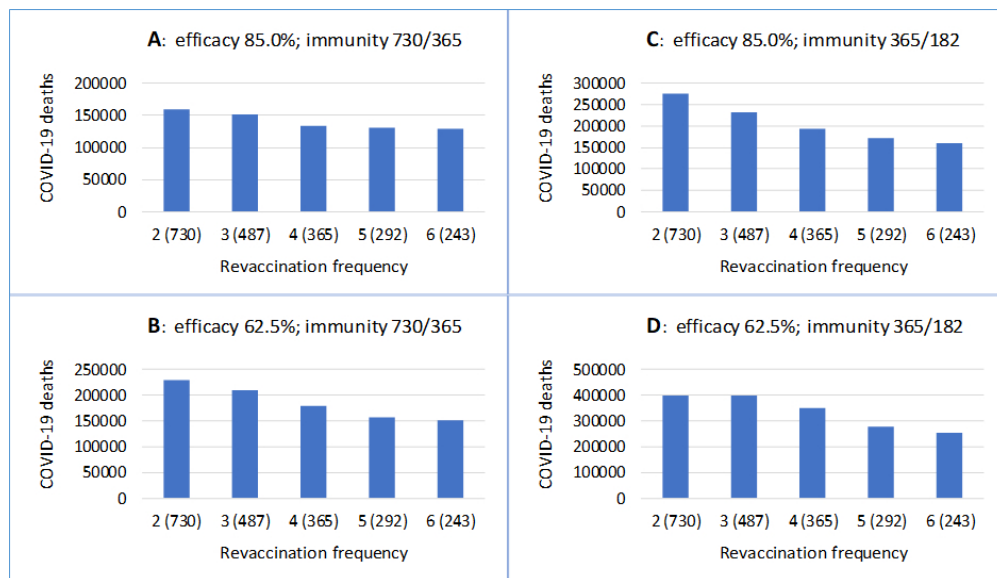

Figure 4. Results of revaccination programmes with different frequency. Vaccine efficacy is 85.0% in fig 4A/C and 62.5% in fig 4B/D, respectively. Duration of immunity lasts 730/365 in fig 4A/B and 365/182 days in fig 4C/D, respectively.

248x142mm (96 x 96 DPI)

**Supplementary tables for:****Vaccination against COVID-19 and society's return to normality in England: a modelling investigation of different types of naturally acquired and vaccine induced immunity**

1. Projected total and daily peaks of COVID-19 deaths by the end of 2024 in England, under different scenarios of annual vaccination programmes Data sources and model verification
2. Projected total and daily peaks of COVID-19 deaths by the end of 2024 in England by revaccination frequency.
3. Projected total and daily peaks of COVID-19 deaths by the end of 2024 in England, under different scenarios of uptake rate of vaccination in younger adults

## Supplementary table: 1

### Projected total and daily peaks of COVID-19 deaths by the end of 2024 in England under different scenarios of annual vaccination programmes

#### Assumptions and notes:

75-90% vaccination coverage of individuals aged  $\geq 16$  years old.

Initial overall vaccine efficacy: 62.5% after dose-1 and 85% after dose-2.

The overall vaccine efficacy is equally attributable to the infection and disease protection.

| Scenario | Vaccination waves (interval days) | Long-term vaccine efficacy | Reduction in reinfectivity | Immunity duration (day): Natural /vaccine | Total COVID-19 deaths (2020-2024) | Daily peaks of COVID-19 deaths |      |      |
|----------|-----------------------------------|----------------------------|----------------------------|-------------------------------------------|-----------------------------------|--------------------------------|------|------|
|          |                                   |                            |                            |                                           |                                   | 2022                           | 2023 | 2024 |
| A1a1     | 1                                 | 85.0%                      | 60%                        | No waning                                 | 128,039                           | 28                             | 0    | 0    |
| A1a2     | 2 (365)                           | 85.0%                      | 60%                        | No waning                                 | 127,464                           | 28                             | 0    | 0    |
| A1a3     | 3 (365)                           | 85.0%                      | 60%                        | No waning                                 | 127,464                           | 28                             | 0    | 0    |
| A1a4     | 4 (365)                           | 85.0%                      | 60%                        | No waning                                 | 127,464                           | 28                             | 0    | 0    |
| A1b1     | 1                                 | 85.0%                      | 60%                        | 730/365                                   | 242,691                           | 28                             | 592  | 582  |
| A1b2     | 2 (365)                           | 85.0%                      | 60%                        | 730/365                                   | 154,956                           | 28                             | 0    | 592  |
| A1b3     | 3 (365)                           | 85.0%                      | 60%                        | 730/365                                   | 127,550                           | 28                             | 0    | 0    |
| A1b4     | 4 (365)                           | 85.0%                      | 60%                        | 730/365                                   | 127,550                           | 28                             | 0    | 0    |
| A1c1     | 1                                 | 85.0%                      | 60%                        | 365/182                                   | 239,044                           | 281                            | 452  | 56   |
| A1c2     | 2 (365)                           | 85.0%                      | 60%                        | 365/182                                   | 196,149                           | 89                             | 78   | 392  |
| A1c3     | 3 (365)                           | 85.0%                      | 60%                        | 365/182                                   | 155,320                           | 89                             | 2    | 109  |
| A1c4     | 4 (365)                           | 85.0%                      | 60%                        | 365/182                                   | 148,093                           | 89                             | 2    | 7    |
| B1a1     | 1                                 | 62.5%                      | 60%                        | No waning                                 | 144,586                           | 105                            | 0    | 0    |
| B1a2     | 2 (365)                           | 62.5%                      | 60%                        | No waning                                 | 142,720                           | 104                            | 0    | 0    |
| B1a3     | 3 (365)                           | 62.5%                      | 60%                        | No waning                                 | 142,720                           | 104                            | 0    | 0    |
| B1a4     | 4 (365)                           | 62.5%                      | 60%                        | No waning                                 | 142,720                           | 104                            | 0    | 0    |
| B1b1     | 1                                 | 62.5%                      | 60%                        | 730/365                                   | 320,789                           | 105                            | 952  | 950  |
| B1b2     | 2 (365)                           | 62.5%                      | 60%                        | 730/365                                   | 230,198                           | 104                            | 0    | 1066 |
| B1b3     | 3 (365)                           | 62.5%                      | 60%                        | 730/365                                   | 143,670                           | 104                            | 0    | 16   |
| B1b4     | 4 (365)                           | 62.5%                      | 60%                        | 730/365                                   | 143,233                           | 104                            | 0    | 0    |
| B1c1     | 1                                 | 62.5%                      | 60%                        | 365/182                                   | 353,663                           | 528                            | 536  | 407  |

|      |         |       |     |         |         |     |     |     |
|------|---------|-------|-----|---------|---------|-----|-----|-----|
| B1c2 | 2 (365) | 62.5% | 60% | 365/182 | 292,109 | 351 | 103 | 915 |
| B1c3 | 3 (365) | 62.5% | 60% | 365/182 | 225,230 | 351 | 2   | 412 |
| B1c4 | 4 (365) | 62.5% | 60% | 365/182 | 198,684 | 351 | 2   | 47  |

|      |         |       |     |           |         |     |      |      |
|------|---------|-------|-----|-----------|---------|-----|------|------|
| A2a1 | 1       | 85.0% | 45% | No waning | 132,749 | 42  | 0    | 0    |
| A2a2 | 2 (365) | 85.0% | 45% | No waning | 131,963 | 42  | 0    | 0    |
| A2a3 | 3 (365) | 85.0% | 45% | No waning | 131,963 | 42  | 0    | 0    |
| A2a4 | 4 (365) | 85.0% | 45% | No waning | 131,963 | 42  | 0    | 0    |
| A2b1 | 1       | 85.0% | 45% | 730/365   | 265,799 | 42  | 627  | 243  |
| A2b2 | 2 (365) | 85.0% | 45% | 730/365   | 206,600 | 42  | 9    | 731  |
| A2b3 | 3 (365) | 85.0% | 45% | 730/365   | 159,912 | 42  | 0    | 582  |
| A2b4 | 4 (365) | 85.0% | 45% | 730/365   | 134,421 | 42  | 0    | 36   |
| A2c1 | 1       | 85.0% | 45% | 365/182   | 373,907 | 479 | 588  | 435  |
| A2c2 | 2 (365) | 85.0% | 45% | 365/182   | 266,690 | 151 | 675  | 628  |
| A2c3 | 3 (365) | 85.0% | 45% | 365/182   | 222,944 | 151 | 55   | 363  |
| A2c4 | 4 (365) | 85.0% | 45% | 365/182   | 194,661 | 151 | 55   | 168  |
| B2a1 | 1       | 62.5% | 45% | No waning | 163,679 | 209 | 0    | 0    |
| B2a2 | 2 (365) | 62.5% | 45% | No waning | 161,055 | 209 | 0    | 0    |
| B2a3 | 3 (365) | 62.5% | 45% | No waning | 161,055 | 209 | 0    | 0    |
| B2a4 | 4 (365) | 62.5% | 45% | No waning | 161,055 | 209 | 0    | 0    |
| B2b1 | 1       | 62.5% | 45% | 730/365   | 383,433 | 209 | 916  | 801  |
| B2b2 | 2 (365) | 62.5% | 45% | 730/365   | 304,138 | 209 | 13   | 1301 |
| B2b3 | 3 (365) | 62.5% | 45% | 730/365   | 236,662 | 209 | 0    | 952  |
| B2b4 | 4 (365) | 62.5% | 45% | 730/365   | 179,002 | 209 | 0    | 224  |
| B2c1 | 1       | 62.5% | 45% | 365/182   | 611,929 | 867 | 1542 | 2437 |
| B2c2 | 2 (365) | 62.5% | 45% | 365/182   | 443,176 | 615 | 1860 | 1096 |
| B2c3 | 3 (365) | 62.5% | 45% | 365/182   | 376,242 | 615 | 537  | 1092 |
| B2c4 | 4 (365) | 62.5% | 45% | 365/182   | 350,016 | 615 | 537  | 886  |

|      |         |       |     |           |         |    |   |   |
|------|---------|-------|-----|-----------|---------|----|---|---|
| A3a1 | 1       | 85.0% | 30% | No waning | 138,595 | 64 | 0 | 0 |
| A3a2 | 2 (365) | 85.0% | 30% | No waning | 137,672 | 64 | 0 | 0 |
| A3a3 | 3 (365) | 85.0% | 30% | No waning | 137,672 | 64 | 0 | 0 |
| A3a4 | 4 (365) | 85.0% | 30% | No waning | 137,672 | 64 | 0 | 0 |

|      |         |       |     |           |         |      |      |      |
|------|---------|-------|-----|-----------|---------|------|------|------|
| A3b1 | 1       | 85.0% | 30% | 730/365   | 301,437 | 64   | 1235 | 218  |
| A3b2 | 2 (365) | 85.0% | 30% | 730/365   | 259,144 | 64   | 297  | 1645 |
| A3b3 | 3 (365) | 85.0% | 30% | 730/365   | 187,753 | 64   | 4    | 324  |
| A3b4 | 4 (365) | 85.0% | 30% | 730/365   | 152,926 | 64   | 4    | 131  |
| A3c1 | 1       | 85.0% | 30% | 365/182   | 498,043 | 743  | 764  | 1933 |
| A3c2 | 2 (365) | 85.0% | 30% | 365/182   | 321,779 | 208  | 537  | 599  |
| A3c3 | 3 (365) | 85.0% | 30% | 365/182   | 317,223 | 208  | 145  | 618  |
| A3c4 | 4 (365) | 85.0% | 30% | 365/182   | 229,664 | 208  | 145  | 96   |
| B3a1 | 1       | 62.5% | 30% | No waning | 188,227 | 366  | 0    | 0    |
| B3a2 | 2 (365) | 62.5% | 30% | No waning | 185,384 | 366  | 0    | 0    |
| B3a3 | 3 (365) | 62.5% | 30% | No waning | 185,384 | 366  | 0    | 0    |
| B3a4 | 4 (365) | 62.5% | 30% | No waning | 185,384 | 366  | 0    | 0    |
| B3b1 | 1       | 62.5% | 30% | 730/365   | 448,904 | 366  | 1093 | 649  |
| B3b2 | 2 (365) | 62.5% | 30% | 730/365   | 392,651 | 366  | 98   | 2877 |
| B3b3 | 3 (365) | 62.5% | 30% | 730/365   | 291,181 | 366  | 3    | 720  |
| B3b4 | 4 (365) | 62.5% | 30% | 730/365   | 233,075 | 366  | 3    | 384  |
| B3c1 | 1       | 62.5% | 30% | 365/182   | 822,318 | 1095 | 2571 | 3202 |
| B3c2 | 2 (365) | 62.5% | 30% | 365/182   | 682,299 | 888  | 1714 | 5055 |
| B3c3 | 3 (365) | 62.5% | 30% | 365/182   | 627,017 | 888  | 616  | 3165 |
| B3c4 | 4 (365) | 62.5% | 30% | 365/182   | 430,219 | 888  | 616  | 1362 |



**Supplementary table: 2**  
**Projected total and daily peaks of COVID-19 deaths by the end of 2024 in**  
**England by revaccination frequency**

**Assumptions and notes:**

Age-based 75-90% vaccination coverage of individuals aged 16+.

Initial overall vaccine efficacy: 62.5% after dose-1 and 85% after dose-2.

The overall vaccine efficacy is equally attributable to the infection and disease protection.

| Scenario | Vaccination waves (interval days) | Long-term vaccine efficacy | Reduction in reinfectivity | Immunity duration (day): Natural /vaccine | Total COVID-19 deaths (2020-2024) | Daily peaks of COVID-19 deaths |      |      |
|----------|-----------------------------------|----------------------------|----------------------------|-------------------------------------------|-----------------------------------|--------------------------------|------|------|
|          |                                   |                            |                            |                                           |                                   | 2022                           | 2023 | 2024 |

|      |         |       |     |         |         |     |     |     |
|------|---------|-------|-----|---------|---------|-----|-----|-----|
| FAa2 | 2 (730) | 85.0% | 60% | 730/365 | 140,596 | 28  | 42  | 22  |
| FAa3 | 3 (487) | 85.0% | 60% | 730/365 | 129,991 | 28  | 0   | 14  |
| FAa4 | 4 (365) | 85.0% | 60% | 730/365 | 127,550 | 28  | 0   | 0   |
| FAa5 | 5 (292) | 85.0% | 60% | 730/365 | 126,529 | 22  | 0   | 0   |
| FAa6 | 6 (243) | 85.0% | 60% | 730/365 | 125,523 | 18  | 0   | 0   |
| FAb2 | 2 (730) | 62.5% | 60% | 730/365 | 179,155 | 105 | 89  | 79  |
| FAb3 | 3 (487) | 62.5% | 60% | 730/365 | 154,959 | 105 | 1   | 56  |
| FAb4 | 4 (365) | 62.5% | 60% | 730/365 | 143,233 | 104 | 0   | 0   |
| FAb5 | 5 (292) | 62.5% | 60% | 730/365 | 139,718 | 86  | 0   | 0   |
| FAb6 | 6 (243) | 62.5% | 60% | 730/365 | 136,348 | 71  | 0   | 0   |
| FAc2 | 2 (730) | 85.0% | 60% | 365/182 | 217,980 | 281 | 385 | 0   |
| FAc3 | 3 (487) | 85.0% | 60% | 365/182 | 169,204 | 196 | 21  | 14  |
| FAc4 | 4 (365) | 85.0% | 60% | 365/182 | 148,093 | 89  | 2   | 7   |
| FAc5 | 5 (292) | 85.0% | 60% | 365/182 | 138,246 | 48  | 1   | 5   |
| FAc6 | 6 (243) | 85.0% | 60% | 365/182 | 133,413 | 32  | 0   | 1   |
| FAd2 | 2 (730) | 62.5% | 60% | 365/182 | 276,596 | 528 | 334 | 8   |
| FAd3 | 3 (487) | 62.5% | 60% | 365/182 | 253,667 | 528 | 46  | 212 |
| FAd4 | 4 (365) | 62.5% | 60% | 365/182 | 198,684 | 351 | 2   | 47  |
| FAd5 | 5 (292) | 62.5% | 60% | 365/182 | 173,428 | 235 | 0   | 26  |
| FAd6 | 6 (243) | 62.5% | 60% | 365/182 | 162,428 | 156 | 0   | 30  |

|      |         |       |     |         |         |    |     |     |
|------|---------|-------|-----|---------|---------|----|-----|-----|
| FBa2 | 2 (730) | 85.0% | 45% | 730/365 | 158,901 | 42 | 207 | 2   |
| FBa3 | 3 (487) | 85.0% | 45% | 730/365 | 150,943 | 42 | 23  | 185 |
| FBa4 | 4 (365) | 85.0% | 45% | 730/365 | 134,421 | 42 | 0   | 36  |
| FBa5 | 5 (292) | 85.0% | 45% | 730/365 | 130,614 | 34 | 0   | 0   |
| FBa6 | 6 (243) | 85.0% | 45% | 730/365 | 129,085 | 24 | 0   | 0   |

|    |      |         |       |     |         |         |     |      |     |
|----|------|---------|-------|-----|---------|---------|-----|------|-----|
| 1  |      |         |       |     |         |         |     |      |     |
| 2  |      |         |       |     |         |         |     |      |     |
| 3  | FBb2 | 2 (730) | 62.5% | 45% | 730/365 | 230,119 | 209 | 181  | 175 |
| 4  | FBb3 | 3 (487) | 62.5% | 45% | 730/365 | 210,446 | 209 | 32   | 426 |
| 5  | FBb4 | 4 (365) | 62.5% | 45% | 730/365 | 179,002 | 209 | 0    | 224 |
| 6  | FBb5 | 5 (292) | 62.5% | 45% | 730/365 | 158,367 | 172 | 0    | 53  |
| 7  | FBb6 | 6 (243) | 62.5% | 45% | 730/365 | 150,833 | 148 | 0    | 10  |
| 8  |      |         |       |     |         |         |     |      |     |
| 9  |      |         |       |     |         |         |     |      |     |
| 10 | FBc2 | 2 (730) | 85.0% | 45% | 365/182 | 275,028 | 479 | 565  | 14  |
| 11 | FBc3 | 3 (487) | 85.0% | 45% | 365/182 | 231,322 | 377 | 87   | 231 |
| 12 | FBc4 | 4 (365) | 85.0% | 45% | 365/182 | 194,661 | 151 | 55   | 168 |
| 13 | FBc5 | 5 (292) | 85.0% | 45% | 365/182 | 170,881 | 80  | 49   | 102 |
| 14 | FBc6 | 6 (243) | 85.0% | 45% | 365/182 | 158,864 | 50  | 24   | 80  |
| 15 |      |         |       |     |         |         |     |      |     |
| 16 |      |         |       |     |         |         |     |      |     |
| 17 | FBd2 | 2 (730) | 62.5% | 45% | 365/182 | 400,280 | 867 | 1052 | 73  |
| 18 | FBd3 | 3 (487) | 62.5% | 45% | 365/182 | 397,725 | 867 | 507  | 522 |
| 19 | FBd4 | 4 (365) | 62.5% | 45% | 365/182 | 350,016 | 615 | 537  | 886 |
| 20 | FBd5 | 5 (292) | 62.5% | 45% | 365/182 | 278,879 | 390 | 314  | 540 |
| 21 | FBd6 | 6 (243) | 62.5% | 45% | 365/182 | 255,266 | 282 | 238  | 470 |
| 22 |      |         |       |     |         |         |     |      |     |
| 23 |      |         |       |     |         |         |     |      |     |
| 24 |      |         |       |     |         |         |     |      |     |

|    |      |         |       |     |         |         |      |      |      |
|----|------|---------|-------|-----|---------|---------|------|------|------|
| 25 | FCa2 | 2 (730) | 85.0% | 30% | 730/365 | 187,710 | 64   | 461  | 0    |
| 26 | FCa3 | 3 (487) | 85.0% | 30% | 730/365 | 181,301 | 64   | 286  | 455  |
| 27 | FCa4 | 4 (365) | 85.0% | 30% | 730/365 | 152,926 | 64   | 4    | 131  |
| 28 | FCa5 | 5 (292) | 85.0% | 30% | 730/365 | 144,263 | 48   | 0    | 58   |
| 29 | FCa6 | 6 (243) | 85.0% | 30% | 730/365 | 135,771 | 38   | 0    | 50   |
| 30 |      |         |       |     |         |         |      |      |      |
| 31 |      |         |       |     |         |         |      |      |      |
| 32 | FCb2 | 2 (730) | 62.5% | 30% | 730/365 | 289,900 | 366  | 251  | 349  |
| 33 | FCb3 | 3 (487) | 62.5% | 30% | 730/365 | 283,517 | 366  | 215  | 1173 |
| 34 | FCb4 | 4 (365) | 62.5% | 30% | 730/365 | 233,075 | 366  | 3    | 384  |
| 35 | FCb5 | 5 (292) | 62.5% | 30% | 730/365 | 215,885 | 318  | 0    | 228  |
| 36 | FCb6 | 6 (243) | 62.5% | 30% | 730/365 | 196,552 | 275  | 0    | 368  |
| 37 |      |         |       |     |         |         |      |      |      |
| 38 |      |         |       |     |         |         |      |      |      |
| 39 | FCc2 | 2 (730) | 85.0% | 30% | 365/182 | 460,413 | 743  | 764  | 1973 |
| 40 | FCc3 | 3 (487) | 85.0% | 30% | 365/182 | 306,941 | 564  | 488  | 550  |
| 41 | FCc4 | 4 (365) | 85.0% | 30% | 365/182 | 229,664 | 208  | 145  | 96   |
| 42 | FCc5 | 5 (292) | 85.0% | 30% | 365/182 | 207,684 | 106  | 189  | 130  |
| 43 | FCc6 | 6 (243) | 85.0% | 30% | 365/182 | 181,143 | 65   | 159  | 88   |
| 44 |      |         |       |     |         |         |      |      |      |
| 45 |      |         |       |     |         |         |      |      |      |
| 46 | FCd2 | 2 (730) | 62.5% | 30% | 365/182 | 674,854 | 1095 | 2328 | 5638 |
| 47 | FCd3 | 3 (487) | 62.5% | 30% | 365/182 | 548,250 | 1019 | 737  | 613  |
| 48 | FCd4 | 4 (365) | 62.5% | 30% | 365/182 | 430,219 | 888  | 616  | 1362 |
| 49 | FCd5 | 5 (292) | 62.5% | 30% | 365/182 | 336,705 | 543  | 527  | 255  |
| 50 | FCd6 | 6 (243) | 62.5% | 30% | 365/182 | 306,706 | 428  | 506  | 659  |
| 51 |      |         |       |     |         |         |      |      |      |
| 52 |      |         |       |     |         |         |      |      |      |
| 53 |      |         |       |     |         |         |      |      |      |
| 54 |      |         |       |     |         |         |      |      |      |
| 55 |      |         |       |     |         |         |      |      |      |
| 56 |      |         |       |     |         |         |      |      |      |
| 57 |      |         |       |     |         |         |      |      |      |
| 58 |      |         |       |     |         |         |      |      |      |
| 59 |      |         |       |     |         |         |      |      |      |
| 60 |      |         |       |     |         |         |      |      |      |

### Supplementary table: 3

#### Projected total and daily peaks of COVID-19 deaths by the end of 2024 in England under different scenarios of uptake rate of vaccination in younger adults

##### Assumptions and

##### notes:

Initial overall vaccine efficacy: 62.5% after dose-1 and 85% after dose-2.

The overall vaccine efficacy is equally attributable to the infection and disease protection.

Reinfectivity is reduced by 45%.

| Scenario | Uptake rate | Vaccination waves (interval days) | Long-term vaccine efficacy | Immunity duration (day): Natural /vaccine | Total COVID-19 deaths (2020-2024) | Daily peaks of COVID-19 deaths |      |      |
|----------|-------------|-----------------------------------|----------------------------|-------------------------------------------|-----------------------------------|--------------------------------|------|------|
|          |             |                                   |                            |                                           |                                   | 2022                           | 2023 | 2024 |

##### Higher coverage in younger adults: age 16-29: 80%; age 30-39: 85%; age 40-49: 90; age 50+: 90%

|       |           |         |       |         |        |     |      |      |
|-------|-----------|---------|-------|---------|--------|-----|------|------|
| A2b1y | 0.80-0.90 | 1       | 85.0% | 730/365 | 269147 | 33  | 544  | 328  |
| A2b2y | 0.80-0.90 | 2 (365) | 85.0% | 730/365 | 203065 | 33  | 5    | 646  |
| A2b3y | 0.80-0.90 | 3 (365) | 85.0% | 730/365 | 149709 | 33  | 0    | 516  |
| A2b4y | 0.80-0.90 | 4 (365) | 85.0% | 730/365 | 131794 | 33  | 0    | 23   |
| A2c1y | 0.80-0.90 | 1       | 85.0% | 365/182 | 374300 | 652 | 681  | 597  |
| A2c2y | 0.80-0.90 | 2 (365) | 85.0% | 365/182 | 253530 | 114 | 454  | 438  |
| A2c3y | 0.80-0.90 | 3 (365) | 85.0% | 365/182 | 214420 | 114 | 41   | 215  |
| A2c4y | 0.80-0.90 | 4 (365) | 85.0% | 365/182 | 182710 | 114 | 41   | 82   |
| B2b1y | 0.80-0.90 | 1       | 62.5% | 730/365 | 380068 | 171 | 852  | 787  |
| B2b2y | 0.80-0.90 | 2 (365) | 62.5% | 730/365 | 294212 | 171 | 17   | 1339 |
| B2b3y | 0.80-0.90 | 3 (365) | 62.5% | 730/365 | 230951 | 171 | 0    | 813  |
| B2b4y | 0.80-0.90 | 4 (365) | 62.5% | 730/365 | 175249 | 171 | 0    | 187  |
| B2c1y | 0.80-0.90 | 1       | 62.5% | 365/182 | 618489 | 764 | 1506 | 1842 |
| B2c2y | 0.80-0.90 | 2 (365) | 62.5% | 365/182 | 425932 | 515 | 1578 | 875  |
| B2c3y | 0.80-0.90 | 3 (365) | 62.5% | 365/182 | 356424 | 515 | 465  | 877  |
| B2c4y | 0.80-0.90 | 4 (365) | 62.5% | 365/182 | 331865 | 515 | 465  | 695  |

##### Moderate coverage in younger adults: age 16-29: 75%; age 30-39: 80%; age 40-49: 85%; age 50+: 90%

|      |           |         |       |         |        |     |     |     |
|------|-----------|---------|-------|---------|--------|-----|-----|-----|
| A2b1 | 0.75-0.90 | 1       | 85.0% | 730/365 | 265799 | 42  | 627 | 243 |
| A2b2 | 0.75-0.90 | 2 (365) | 85.0% | 730/365 | 206600 | 42  | 9   | 731 |
| A2b3 | 0.75-0.90 | 3 (365) | 85.0% | 730/365 | 159912 | 42  | 0   | 582 |
| A2b4 | 0.75-0.90 | 4 (365) | 85.0% | 730/365 | 134421 | 42  | 0   | 36  |
| A2c1 | 0.75-0.90 | 1       | 85.0% | 365/182 | 373907 | 479 | 588 | 435 |
| A2c2 | 0.75-0.90 | 2 (365) | 85.0% | 365/182 | 266690 | 151 | 675 | 628 |

|      |           |         |       |         |        |     |      |      |
|------|-----------|---------|-------|---------|--------|-----|------|------|
| A2c3 | 0.75-0.90 | 3 (365) | 85.0% | 365/182 | 222944 | 151 | 55   | 363  |
| A2c4 | 0.75-0.90 | 4 (365) | 85.0% | 365/182 | 194661 | 151 | 55   | 168  |
| B2b1 | 0.75-0.90 | 1       | 62.5% | 730/365 | 383433 | 209 | 916  | 801  |
| B2b2 | 0.75-0.90 | 2 (365) | 62.5% | 730/365 | 304138 | 209 | 13   | 1301 |
| B2b3 | 0.75-0.90 | 3 (365) | 62.5% | 730/365 | 236662 | 209 | 0    | 952  |
| B2b4 | 0.75-0.90 | 4 (365) | 62.5% | 730/365 | 179002 | 209 | 0    | 224  |
| B2c1 | 0.75-0.90 | 1       | 62.5% | 365/182 | 611929 | 867 | 1542 | 2437 |
| B2c2 | 0.75-0.90 | 2 (365) | 62.5% | 365/182 | 443176 | 615 | 1860 | 1096 |
| B2c3 | 0.75-0.90 | 3 (365) | 62.5% | 365/182 | 376242 | 615 | 537  | 1092 |
| B2c4 | 0.75-0.90 | 4 (365) | 62.5% | 365/182 | 350016 | 615 | 537  | 886  |

**Lower vaccination coverage in younger adults: age 16-29: 60%; age 30-39: 70%; age 40-49: 80%; age 50+: 90%**

|       |           |         |       |         |        |     |      |      |
|-------|-----------|---------|-------|---------|--------|-----|------|------|
| A2b1x | 0.60-0.90 | 1       | 85.0% | 730/365 | 266219 | 67  | 638  | 209  |
| A2b2x | 0.60-0.90 | 2 (365) | 85.0% | 730/365 | 214159 | 67  | 14   | 761  |
| A2b3x | 0.60-0.90 | 3 (365) | 85.0% | 730/365 | 171971 | 67  | 0    | 562  |
| A2b4x | 0.60-0.90 | 4 (365) | 85.0% | 730/365 | 140179 | 67  | 0    | 46   |
| A2c1x | 0.60-0.90 | 1       | 85.0% | 365/182 | 379362 | 477 | 550  | 353  |
| A2c2x | 0.60-0.90 | 2 (365) | 85.0% | 365/182 | 290730 | 243 | 1064 | 1066 |
| A2c3x | 0.60-0.90 | 3 (365) | 85.0% | 365/182 | 243384 | 243 | 46   | 548  |
| A2c4x | 0.60-0.90 | 4 (365) | 85.0% | 365/182 | 209857 | 243 | 46   | 255  |
| B2b1x | 0.60-0.90 | 1       | 62.5% | 730/365 | 398443 | 306 | 1376 | 1052 |
| B2b2x | 0.60-0.90 | 2 (365) | 62.5% | 730/365 | 333844 | 306 | 3    | 1150 |
| B2b3x | 0.60-0.90 | 3 (365) | 62.5% | 730/365 | 237005 | 306 | 0    | 1250 |
| B2b4x | 0.60-0.90 | 4 (365) | 62.5% | 730/365 | 185126 | 306 | 0    | 240  |
| B2c1x | 0.60-0.90 | 1       | 62.5% | 365/182 | 520700 | 977 | 1747 | 1732 |
| B2c2x | 0.60-0.90 | 2 (365) | 62.5% | 365/182 | 470214 | 814 | 2238 | 1526 |
| B2c3x | 0.60-0.90 | 3 (365) | 62.5% | 365/182 | 406564 | 814 | 563  | 1408 |
| B2c4x | 0.60-0.90 | 4 (365) | 62.5% | 365/182 | 377531 | 814 | 563  | 1140 |

1  
2 **Supplementary files for:**  
3

4  
5 **Vaccination against COVID-19 and society's return to normality in England: a**  
6 **modelling investigation of different types of naturally acquired and vaccine induced**  
7 **immunity**  
8  
9

- 10  
11  
12  
13  
14 **1. Model structure and status**  
15  
16 **2. Data sources and model verification**  
17  
18 **3. Projection scenarios**  
19  
20 **4. Mathematical equations**  
21  
22  
23 **5. References**  
24  
25  
26  
27  
28  
29  
30  
31  
32  
33  
34  
35  
36  
37  
38  
39  
40  
41  
42  
43  
44  
45  
46  
47  
48  
49  
50  
51  
52  
53  
54  
55  
56  
57  
58  
59  
60

# 1. Model structure and status

This is a discrete-time population dynamic simulation model. Population in England are partitioned into discrete categories by sex (male or female), age (0-4, 5-9, then by 10 year age bands, and 80+), and Covid-19 infection categories. The main infection categories include: susceptible (SU), exposed (EX), infected (IN), and recovered (RE) (appendix figure 1). The infected individuals are further categorised as asymptomatic, symptomatic, self-isolated, and hospitalised.

**Appendix figure 1: Model structure and transmission across status**

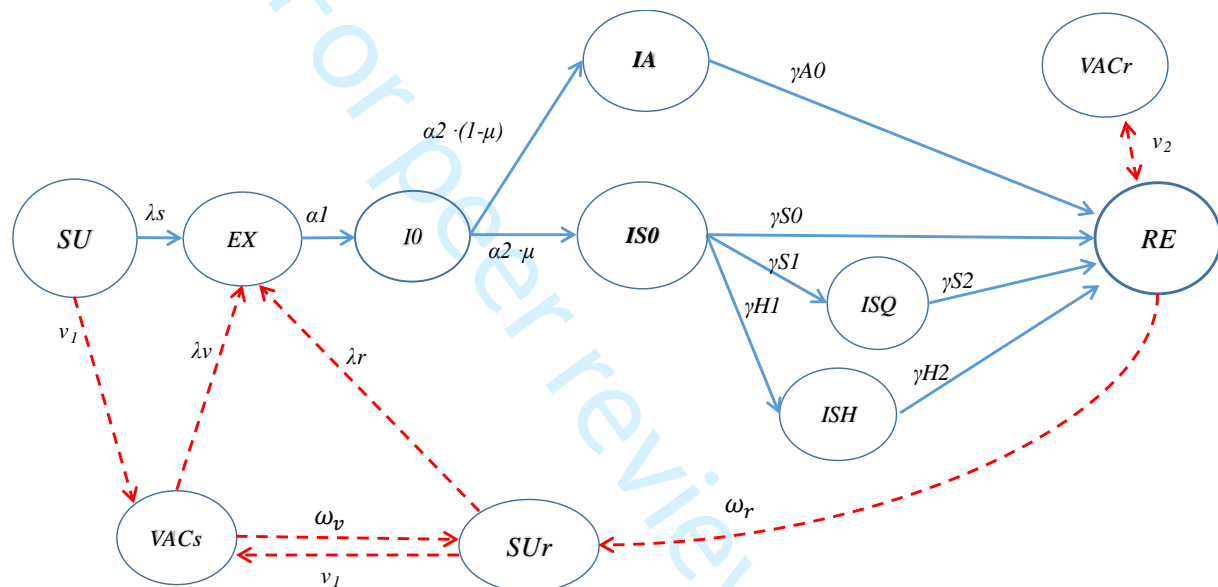

## Definitions of compartmental variables in appendix figure 1

- SU: susceptible individuals
- SUr: Individuals susceptible to reinfection after immunity waning
- EX: exposed individuals, not infectious
- IO: infectious, before symptom onset
- IA: infectious individuals with no or very mild symptoms
- ISO: symptomatic patients who are not quarantined
- ISQ: symptomatic patients self-isolated
- ISH: symptomatic patients who are hospitalised
- RE: recovered from covid-19 infection
- VACs: vaccinated susceptible individuals
- VACr: vaccinated individuals who recovered from infection

## Transition parameters in appendix figure 1:

- $\lambda_s$ : Force of infection ( $\lambda$ ) measures the risk (probability) of infection transmission.
- $\alpha_1$ : rate of progressing from being exposed to being infectious.

- 1
- 2 •  $\alpha_2$ : rate of progressing from being asymptomatic infectious to symptomatic.
- 3
- 4 •  $\mu$ : proportion of infected individuals who will be symptomatic; age-specific
- 5
- 6 •  $\gamma_{A0}$ : rate of recovering for asymptomatic individuals
- 7
- 8 •  $\gamma_{S0}$  rate of recovering for symptomatic, not isolated/hospitalised patients
- 9
- 10 •  $\gamma_{S1}$ : rate of being isolated in symptomatic patients
- 11
- 12 •  $\gamma_{S2}$ : rate of recovering in isolated patients
- 13
- 14 •  $\gamma_{H1}$ : rate of being hospitalised for symptomatic patients
- 15
- 16 •  $\gamma_{H2}$ : rate of recovering in hospitalised patients
- 17
- 18 •  $v_1$ : rate of vaccinating susceptible individuals
- 19
- 20 •  $v_2$ : rate of vaccinating recovered individuals
- 21
- 22 •  $w_v$ : rate of immunity waning in vaccinated individuals
- 23
- 24 •  $w_r$ : rate of immunity waning in recovered individuals

25 All individuals in England are assumed to be susceptible to SARS-CoV-2 infection at the beginning of  
 26 2020. Susceptible individuals may be infected by contacting infectious individuals, and the infection  
 27 status is changed from “susceptible” (SU) to “exposed” (EX). The exposed individuals are not infectious  
 28 during the early incubation period, but start to be infectious before the onset of symptoms. Individuals  
 29 infected with SARS-CoV-2 virus may have no or very mild symptoms (IA), and palpable symptoms  
 30 (symptomatic or clinical infections). Asymptomatic individuals can spread SARS-CoV-2 virus before  
 31 recovery, although the transmission risk may be lower than symptomatic patients. Symptomatic patients  
 32 are further classified into three categories: symptomatic patients who are neither isolated nor  
 33 hospitalised (IS0), those who self-isolate at home (ISQ), and those who are hospitalised (including those  
 34 being admitted to intensive care units) (ISH). Symptomatic patients are infectious and can transmit the  
 35 virus to susceptible people before being isolated, hospitalised or recovered. We assume that hospitalised  
 36 patients (ISH) are well isolated and no longer able to spread the virus to the susceptible population,  
 37 although infectious patients who are self-isolated at home (ISQ) may transmit virus to household  
 38 contacts.

39 Individuals may recover from previous infection of SARS-CoV-2 (RE), and the susceptible and  
 40 recovered individuals may be vaccinated with vaccines against SARS-CoV-2 virus (VAC1 and VAC2).  
 41 Individuals recovered or effectively vaccinated may develop immune responses against infection with  
 42 SARS-CoV-2. However, if the protective immunity is not long lasting, individuals who have recovered  
 43 or vaccinated may become susceptible again after the waning of the immunity (SUR).

44 The immune response against COVID-19, either by naturally acquired from past SARS-CoV-2  
 45 infection or vaccine-induced, may be long lasting or short-lived. Immune response may reduce  
 46 susceptibility of individuals to infection (infection protection, or sterilising, immunity), reduce disease  
 47 severity after being infected (disease reduction immunity), and reduce infectivity of those who are  
 48 reinfected after recovery or being vaccinated (re-infectivity reduction immunity).<sup>1</sup> According to existing

evidence on immunological characteristics for other human coronaviruses, immunity against reinfection (sterilising immunity) may be waning in several months, while disease and re infectivity reduction responses are likely long lasting.<sup>1</sup> According to these basic concepts specified by Lavine et al,<sup>1</sup> we incorporate the three types of immune responses into the model, to explicitly evaluate their impacts on future transmission dynamics (appendix figure 2).

**Appendix figure 2: Types of immune responses by natural infection or vaccination**

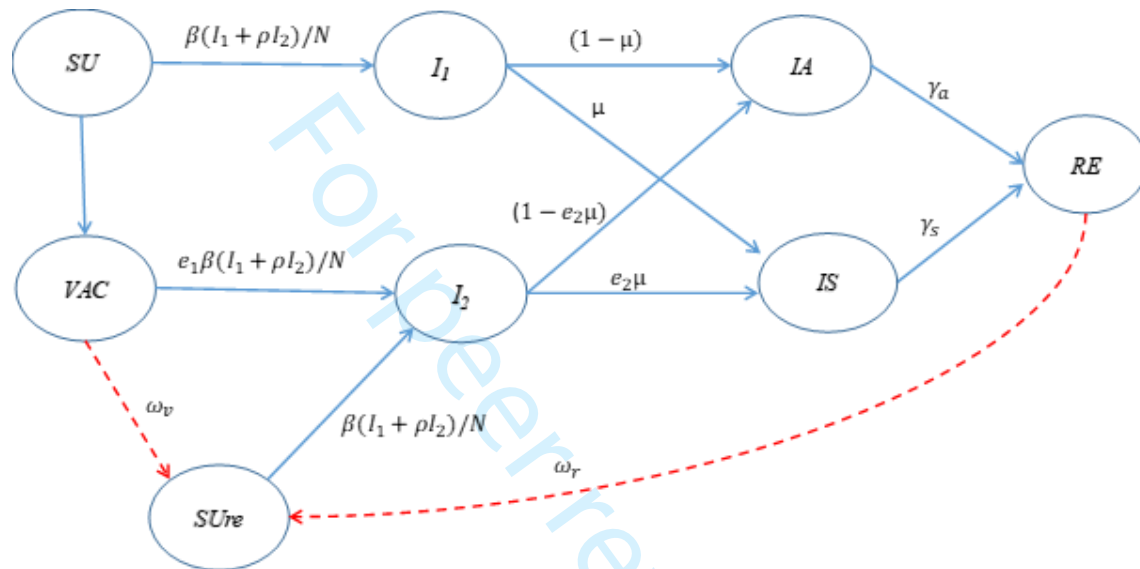

**Notes to appendix figure 2:**

- Appendix figure2 is a simplified version of appendix figure 1, not showing isolation and hospitalisation for symptomatic patients.
- $N$ : The number of the population
- $\beta$ : The transmission rate, i.e., the average number of individuals infected daily by an infectious person. It is a function of the number of daily close contacts per person ( $c$ ), and the transmission risk per contact between a susceptible and an infectious individual ( $\eta$ ): i.e.,  $\beta=c \cdot \eta$ .
- $I_1$ : Infectious individuals with primary infection
- $I_2$ : Infectious individuals with secondary infection (infected after being vaccinated or recovered)
- $\rho$ : Relative infectivity of the secondary infection ( $I_2$ ) compared with the primary infection ( $I_1$ ). For example, if  $\rho=0.6$ , the infectivity of  $I_2$  is 40% lower than the infectivity of  $I_1$
- $\mu$ : proportion of infected individuals who will be symptomatic; age-specific
- $e_1$ : Relative efficacy of vaccine for sterilising immunity, reducing risk of virus transmission
- $e_2$ : Relative efficacy of vaccine for pathology reduction, reducing the proportion of symptomatic cases after being infected
- $IA$ : Asymptomatic individuals
- $IS$ : Symptomatic patients
- $\gamma_a$ : Average rate of recovering of asymptomatic individuals
- $\gamma_s$ : Average rate of recovering of symptomatic individuals



- $w_v$ : rate of immunity waning in vaccinated individuals
- $w_r$ : rate of immunity waning in recovered individuals

### Overall and partial vaccine efficacy

Results of randomised controlled trials shown that vaccines may be >90% efficacious (e.g., Pfizer mRNA vaccine) in reducing severe symptomatic diseases, compared with the placebo group.<sup>2</sup> In appendix figure 2,  $e_1$  and  $e_2$  are parameters of vaccine's efficacy in blocking virus transmission and reducing symptomatic cases in the infected, respectively. The reduction in symptomatic cases in the vaccine group may be due to the prevention of infection in susceptible individuals (related to  $e_1$ ), or a lower proportion of infected individuals being symptomatic in the vaccine group (related to  $e_2$ ), or due to a combination of both (note:  $e_1$  and  $e_2 \geq 1$  - overall VE, and  $\leq 1$ ). Let  $\lambda$  is the transmission risk and  $\mu$  is the proportion of symptomatic cases in the infected without vaccination. After being vaccinated, the transmission risk is reduced to  $\lambda \cdot e_1$ , and the proportion of symptomatic cases reduced to  $\mu \cdot e_2$ . For a vaccine with 90% efficacy in reducing the number of symptomatic cases (compared with the control group), it should be true that  $e_1 \cdot e_2 = (1 - 0.90)$ , or  $e_1 = 0.10 / e_2$ . There are many different possible combinations of  $e_1$  and  $e_2$  for a given overall efficacy in reducing symptomatic cases. For example,  $e_1 = e_2 = \text{SQRT}(0.30) = 0.548$  corresponds to a 70% efficacy of vaccine with equal sterilising immunity and pathology reduction. If  $e_1 = 1$  (i.e., zero efficacy in sterilising immunity), all vaccine efficacy will be attributable to the pathology reduction, with  $e_2 = 0.30$ , for a vaccine with 70% efficacy. The partial efficacy is calculated using:  $E_i = 1 - (1 - E_o) / E_d$ , where  $E_i$  is the partial efficacy for infection protection,  $E_d$  is the partial efficacy for disease reduction, and  $E_o$  is the overall vaccine efficacy. The equal partial efficacy is calculated by:  $E_i = E_d = 1 - \sqrt{(1 - E_o)}$ . For vaccines with 90%, 70% and 50% overall efficacy, the equal partial efficacy for the infection protection and disease reduction is 69.4%, 45.2%, and 29.3%, respectively.

## 2. Parameterisation, data sources, and simulation scenarios

### 2.1 Transition parameters and distribution of infectious period

In appendix figure 1, force of infection ( $\lambda$ ) measures the risk of infection,<sup>3</sup> which is a function of transmission rate ( $\eta$ ) and the prevalence of existing infectious individuals ( $I$ ) among the population ( $N$ ):  $\lambda = \eta \cdot I/N$ . The transmission rate  $\eta$  in the discrete-time model can be defined as the average number of new infected individuals generated daily by an infected person. That is,  $\eta = Rt/T$ , in which  $Rt$  is effective reproduction number and  $T$  is the average infectious period for infected individuals. We calculated  $\eta$  as a function of the number of daily contacts per person ( $c$ ), and the risk of transmission per contact between a susceptible and an infected individual ( $\beta$ ):  $\eta = c \cdot \beta$ .<sup>4</sup>

The transition rate between model's compartments in infectious models is often assumed to be constant, calculated by  $1/x$ , in which "x" is the average period that subjects remain before the transition to the model's next compartments.<sup>3</sup> Therefore, the infectious period in standard SIR or SEIR models is usually assumed to be exponentially distributed, with some limitations of the use of exponentially distributed infectious period.<sup>5 6</sup> In this study, we assumed that the transition probability between model's compartments are based on gamma distributed periods that individuals remain in a compartment.<sup>7</sup> The transition probability ( $y$ ) at  $t$  is:  $y_t = (cg_t - cg_{t-1}) / (1 - cg_t)$ , where  $cg_t$  is the gamma cumulative probability by the end of  $t$ . Given mean and shape ( $k$ ) parameters, the gamma distribution based transition probability is used as a deterministic value to estimate the number of individuals moving between two status in this study.

### 2.2 Parameterisation and data sources

We estimated initial parameters based on relevant literature and data from the UK government websites (appendix table 1). Key parameters were calibrated according to the reported numbers of covid-19 deaths, hospitalised patients, and the prevalence of infected individuals in England from January 2020 to June 2021.<sup>8</sup>

Appendix table 1: Summary of key model parameters and data sources

| Parameter                                                                     | Value                                             |                       |                       | Source                                                                                    |
|-------------------------------------------------------------------------------|---------------------------------------------------|-----------------------|-----------------------|-------------------------------------------------------------------------------------------|
| <b>Proportion of asymptomatic cases in infected individuals (%)</b>           |                                                   |                       |                       |                                                                                           |
| Age: 0-9                                                                      | 0.71                                              |                       |                       | Davis et al. <sup>9</sup>                                                                 |
| 10-19                                                                         | 0.79                                              |                       |                       |                                                                                           |
| 20-29                                                                         | 0.73                                              |                       |                       |                                                                                           |
| 30-39                                                                         | 0.67                                              |                       |                       |                                                                                           |
| 40-49                                                                         | 0.60                                              |                       |                       |                                                                                           |
| 50-59                                                                         | 0.51                                              |                       |                       |                                                                                           |
| 60-69                                                                         | 0.37                                              |                       |                       |                                                                                           |
| 70+                                                                           | 0.31                                              |                       |                       |                                                                                           |
| <b>Proportion of self-isolated symptomatic cases who are not hospitalised</b> |                                                   |                       |                       |                                                                                           |
| <b>Age:</b>                                                                   | <b>0-49</b>                                       | <b>50-69</b>          | <b>70+</b>            | Assumed by authors, and calibrated according to reported COVID-19 deaths.                 |
| Before 13/03/2021                                                             | 0.10                                              | 0.10                  | 0.10                  |                                                                                           |
| 13/03-23/03/2020                                                              | 0.40                                              | 0.60                  | 0.80                  |                                                                                           |
| After 24/03/2020                                                              | 0.80-0.90                                         | 0.80-0.95             | 0.90-0.95             |                                                                                           |
| <b>Estimated values of gamma distributed parameters (mean, shape k)</b>       |                                                   |                       |                       |                                                                                           |
|                                                                               | <b>Before 12/03/20</b>                            | <b>13/03-23/03/20</b> | <b>After 23/03/20</b> |                                                                                           |
| Duration from exposed to being preclinical infectious (day)                   | 4.0 (4)                                           | 4.0 (4)               | 4.0 (4)               | Zhang et al. <sup>10</sup><br>Davies et al. <sup>7</sup><br>Ferguson et al. <sup>11</sup> |
| Duration of preclinical infectious (day)                                      | 1.5 (2)                                           | 1.5 (2)               | 1.5 (2)               |                                                                                           |
| Infectious period before recovery (day)                                       | 5.0 (5)                                           | 5.0 (5)               | 5.0 (5)               |                                                                                           |
| Infectious period before being isolated (day)                                 | 4.0 (4)                                           | 3.0 (3)               | 2.0 (2)               |                                                                                           |
| Infectious period during isolation at home (day)                              | 2.0 (2)                                           | 3.0 (3)               | 4.0 (4)               |                                                                                           |
| Infectious period before being hospitalised (day)                             | 4.0 (4)                                           | 3.0 (3)               | 2.0 (2)               |                                                                                           |
| Duration of hospitalisation (day)                                             | 10.0 (10)                                         | 10.0 (10)             | 10.0 (10)             |                                                                                           |
| Delay from being infected to deaths from Covid-19 (day)                       | 23.0 (23)                                         | 23.0 (23)             | 23.0 (23)             | Verity et al. <sup>12</sup>                                                               |
| <b>Case fatality rates (%)</b>                                                |                                                   |                       |                       |                                                                                           |
| Age: 0-9                                                                      | 0.0026                                            |                       |                       | Verity et al. <sup>12</sup> ;<br>Chinese CDC <sup>13</sup>                                |
| 10-19                                                                         | 0.0148                                            |                       |                       |                                                                                           |
| 20-29                                                                         | 0.0600                                            |                       |                       |                                                                                           |
| 30-39                                                                         | 0.1460                                            |                       |                       |                                                                                           |
| 40-49                                                                         | 0.2950                                            |                       |                       |                                                                                           |
| 50-59                                                                         | 1.2500                                            |                       |                       |                                                                                           |
| 60-69                                                                         | 3.9900                                            |                       |                       |                                                                                           |
| 70-79                                                                         | 8.6100                                            |                       |                       |                                                                                           |
| 80+                                                                           | 13.400                                            |                       |                       |                                                                                           |
| <b>Transmission risk by asymptomatic individuals</b>                          | 21% of the transmission risk by symptomatic cases |                       |                       | Li et al. <sup>14</sup>                                                                   |
| <b>Age specific rates of hospitalisation among infected individuals</b>       |                                                   |                       |                       |                                                                                           |
| 0-9                                                                           | 0.010%                                            |                       |                       | Verity et al. <sup>12</sup>                                                               |
| 10-19                                                                         | 0.041%                                            |                       |                       |                                                                                           |

|       |       |  |
|-------|-------|--|
| 20-29 | 1.04% |  |
| 30-39 | 3.43% |  |
| 40-49 | 4.25% |  |
| 50-59 | 8.16% |  |
| 60-69 | 11.8% |  |
| 70-79 | 16.6% |  |
| 80+   | 18.4% |  |
|       |       |  |

We obtained population statistics in England (estimates of mid-year 2020) from Office for National Statistics. It was assumed that all individuals in England were susceptible to SARS-CoV-2 infection at the beginning of 2020. By contacting with infectious individuals, susceptible individuals may be infected, and their infection category is changed from “susceptible” (SU) to “exposed” (EX). “Exposed” refers to the pre-infectious status of infected individuals. According to data from previous studies, the period of incubation before symptom onset was on average 5.5 days,<sup>10</sup> and the exposed individuals start to be infectious about 1.5 days before the onset of symptoms.<sup>7 11</sup> Therefore, we assumed a gamma distribution of incubation period, with a mean non-infectious period of 4 days ( $k=4.0$ ) after being exposed, and a mean infectious period of 1.5 days ( $k=2$ ) before symptom onset.

Individuals infected with SARS-CoV-2 virus may have no or very mild symptoms (asymptomatic infected), and palpable symptoms (symptomatic patients). As in previous modelling studies<sup>7 11</sup>, it was assumed that asymptomatic individuals can spread SARS-CoV-2 virus before recovery, although the infectious risk was assumed to be 21% of symptomatic patients.<sup>14</sup> We used age-specific rates of asymptomatic cases in the infected individuals, reported in a study based on data from 6 countries<sup>9</sup> (appendix table 1).

Symptomatic patients are further classified into three categories: symptomatic patients who are neither isolated nor hospitalised (mainly at the initial phase of the epidemic), those who are self-isolated at home, those who are hospitalised (see appendix figure 1). We assume that asymptomatic individuals were not isolated, although the average number of daily contacts could be reduced by non-pharmaceutical interventions (NPIs), including social distancing, testing, contact tracing, and lockdown. Assumed proportions of self-isolation of symptomatic cases who are not hospitalised, depending on age and NPI measures are shown in appendix table 1.

We assume that only symptomatic patients are hospitalised, and age specific rates of hospitalisation among symptomatic individuals were from Verity et al.<sup>12</sup> The hospitalisation rates were calibrated according to reported numbers of hospitalised patients with covid-19 in England.<sup>15</sup> Based on the reported number of hospitalised patients and estimated number of symptomatic cases, the hospitalisation rate was estimated to be 70% lower than the estimated by Verity et al.<sup>12</sup> Symptomatic patients are infectious and can transmit the virus to susceptible people before being hospitalised or isolated. We assume that hospitalised patients are no longer able to spread the virus to susceptible individuals in the community. However, infected individuals who are self-isolated at home may transmit virus to household contacts.

1  
2 The infectious period before recovery was assumed to be gamma distributed, with a mean value of 5  
3 days. Before implementing any NPIs, the infectious period of symptomatic cases was of a mean value  
4 of 4 days ( $k=4$ ) before being quarantined or hospitalised. After implementing NPI measures, the  
5 infectious period for isolated and hospitalised patients was reduced, having a mean value of 2 days ( $k=2$ ).  
6 The mean hospital stay was assumed to be 10 days ( $k=10$ ) (including ICU admitted patients) (appendix  
7 table 1). Verity et al estimated that the average duration from symptom onset to death was 17.8 days.<sup>12</sup>  
8 Therefore, we assume that covid-19 related deaths occur on average 23 days ( $k=23$ ) after being  
9 exposed/infected.  
10  
11  
12  
13  
14

15 The simulation starts from 1 January 2020, over a period of five years until the end of 2024. We assume  
16 that the first exposed case was imported to England on January 15th 2020, and the daily number of  
17 infectious cases imported was increased by one until 9 February 2020, with a total number of 351 cases  
18 imported in 25 days. The sex-and-age-specific numbers of household and community daily contacts per  
19 person in the UK were obtained from a study in 8 European countries.<sup>16,17</sup> For the purpose of simplicity,  
20 we considered only household contacts (relevant to self-isolation at home) and general daily contacts  
21 (for all types of contacts). The risk of positive transmission per contact between susceptible and  
22 infectious individuals ( $\beta$ ) was estimated by calibrating estimated and reported numbers of covid-19  
23 deaths in England, household and general daily contacts per person, and other model parameters.  
24  
25  
26  
27  
28  
29

30 In this study, all COVID-19 related deaths are assumed to be from symptomatic cases, and age specific  
31 case fatality rates were based on a study by Verity et al.<sup>12</sup> We assume that individuals infected with  
32 Covid-19 will not die from other causes before recovery. Average sex and age specific rates of all-cause  
33 deaths in England during 2015-2019<sup>18</sup> were applied to people who are not infected with or recovered  
34 from covid-19. For simplicity and maintaining a stable population, we assumed that the number of births  
35 at day  $t$  equals to the number of all deaths at day  $t-1$ . Furthermore, we did not consider the influence of  
36 migration on the population. We adjusted the number of individuals belong to an age group (all  $<80+$ )  
37 at the beginning of the year since 2021 by shifting 20% (for age group 0-4 and 5-9) or 10% (for age  
38 group 10-19, ... 70-79) of them to the adjacent higher age group.  
39  
40  
41  
42  
43  
44  
45

### 46 **NPI and seasonal impacts on transmission parameters**

47 Since March 2020, NPI measures were recommended and gradually tightened in England, including  
48 hand washing, mouth covering when coughing in public places, home isolation of individuals with  
49 COVID-19 like symptoms, shielding of vulnerable individuals, avoiding non-essential contacts, and  
50 maintaining social distancing. These measures reduced contacts and transmission risk, and shortened  
51 the period of transmission by symptomatic individuals. We assumed that the general population's  
52 contact rates were reduced by 10% to 40%, depending on age and co-morbidity (appendix table 2).  
53 Based on the reported number of COVID-19 deaths, we estimate that the transmission risk per contact  
54 between infectious and susceptible individuals was reduced from  $\beta=0.094$  before the implementation of  
55 any NPIs to 0.069 by 15 March 2020 and 0.062 since May 2020. The UK government put lockdown  
56  
57  
58  
59  
60

measures in place from 24 March 2020, including working from home if possible, closure of schools and non-essential shops, pubs and restaurants, avoiding non-essential travelling, and cancelling gathering activities. We assume that numbers of general population contacts were reduced by 60-85% (appendix table 2). We assume that the household contacts were not influenced by the NPI measures.

**Appendix table 2: Assumed impacts of NPIs on general contacts in England.** Notes: Values are scaling fractions to reduce the normal contacts. For example, a fraction of 0.80 means the contacts are reduced by 20%.

| Time             | Age group |       |       |      |
|------------------|-----------|-------|-------|------|
|                  | 0-19      | 20-59 | 60-69 | 70+  |
| Before 13/3/2020 | 1.00      | 1.00  | 1.00  | 1.00 |
| 13/03/2020-      | 0.90      | 0.80  | 0.70  | 0.60 |
| 17/03/2020-      | 0.80      | 0.70  | 0.60  | 0.50 |
| 24/03/2020-      | 0.40      | 0.30  | 0.20  | 0.15 |
| 05/07/2020-      | 0.60      | 0.55  | 0.40  | 0.20 |
| 01/09/2020-      | 0.80      | 0.60  | 0.50  | 0.30 |
| 05/11/2020-      | 0.60      | 0.30  | 0.20  | 0.15 |
| 02/12/2020-      | 0.70      | 0.60  | 0.50  | 0.30 |
| 05/01/2021-      | 0.40      | 0.30  | 0.20  | 0.15 |
| 08/03/2021-      | 0.80      | 0.60  | 0.50  | 0.30 |
| 01/05/2021       | 0.90      | 0.80  | 0.70  | 0.60 |
| 19/07/2021-      | 1.00      | 1.00  | 1.00  | 1.00 |

The lockdown measures in England started to be relaxed from 13 May 2020 by allowing partial returning to work. Further relaxing of control measures followed, including reopening of some shops and allowing outdoor meetings up to six people from 1 June, re-opening of more non-essential shops from 5 June, and further relaxing of restrictions (such as re-opening of pubs and restaurants) from 5 July 2020. However, social distancing measures was maintained and face covering was required where social distancing could not be implemented. From 1 September 2020, schools in England were re-opening. Consequently, the transmission risk per contact between susceptible and infectious individuals was increased since September. The impacts of these changes in NPIs were reflected in the assumed social contacts and transmission risk. Because of the new virus variants,<sup>19</sup> the average transmission risk per contact was increased  $\beta=0.077$  since October 2020, and  $\beta=0.081$  since June 2021.

To incorporate the impact of seasonality on future projections, we assumed that the transmission risk is increased by 10% in September, October, March and April, and increased by 20% in November, December, January and February.

## Model verification

We used the developed model and initially estimated parameters to simulate the covid-19 epidemic in England from January 2020 to June 2021. Key parameters were calibrated based mainly on reported

covid-19 related deaths, although numbers of hospitalised patients and infection rates in England were also considered.

We assume that the first exposed case was imported to England on 15 January 2020, and the number of cases imported each day increased by one more case than the previous day until 9 February 2020 (the total number of cases imported in 25 days was therefore 351). We don't use the reproduction number ( $R_0$  or  $R_t$ ) as an input parameter, but derived the reproduction numbers based on a method used by Giordano and colleagues (see equation 55 in Mathematical equations)<sup>320</sup>. We estimated that the basic reproduction number ( $R_0$ ) was 3.63 at the initial stage of the COVID-19 epidemic before any control measures were taken in England, which is similar to findings from previous studies.<sup>7,11</sup> Following the implementation of NPI measures, the estimated reproduction value ( $R_t$ ) was reduced to 0.65 by 24 March. The  $R_t$  value was increased to 0.93 by 5 July 2020 after the NPI measures were relaxed, and  $R_t$  was about 1.09 after school reopening in September and 1.31 by October 2020. The  $R_t$  was reduced to 0.79 since 5 November 2020 after reintroducing NPI measures, increased to about 1.17 after relaxing NPIs since 2 December 2020, and reduced again to about 0.57 since 5 January 2021 after reintroducing lockdown measures (plus rolling out of vaccination) (appendix figure 3). The estimated  $R$  values were within the range of the reported in England (<https://coronavirus.data.gov.uk/>).

### Appendix figure 3: Estimated reproduction numbers, between 01/2020 – 06/2021, in England

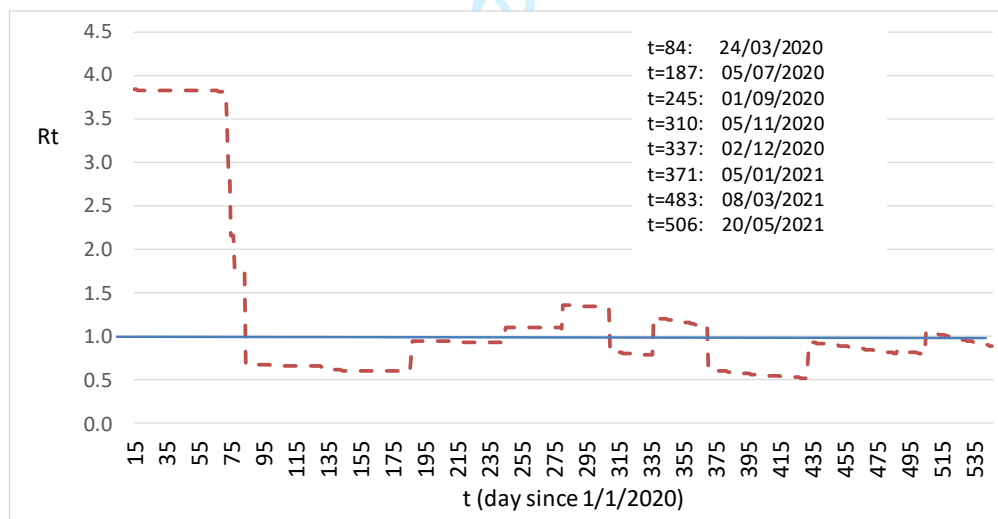

The model estimated that the prevalence of the recovered was 5.5% by 26 April, 7.6% by 24 May, and 8.5% by 24 June 2020, which were similar to the estimated rates of positive antibodies to Covid-19 in the UK (i.e., 7.1% in May-June 2020).<sup>21</sup> Data on the prevalence of infected individuals in the community was available from May 2020. The model estimated prevalence of infected individuals from January 2020 to January 2021, which had a similar trend as the reported prevalence in England (appendix figure 4).

**Appendix figure 4: Estimated and reported prevalence of infection, from January 2020 to June 2021, in England**

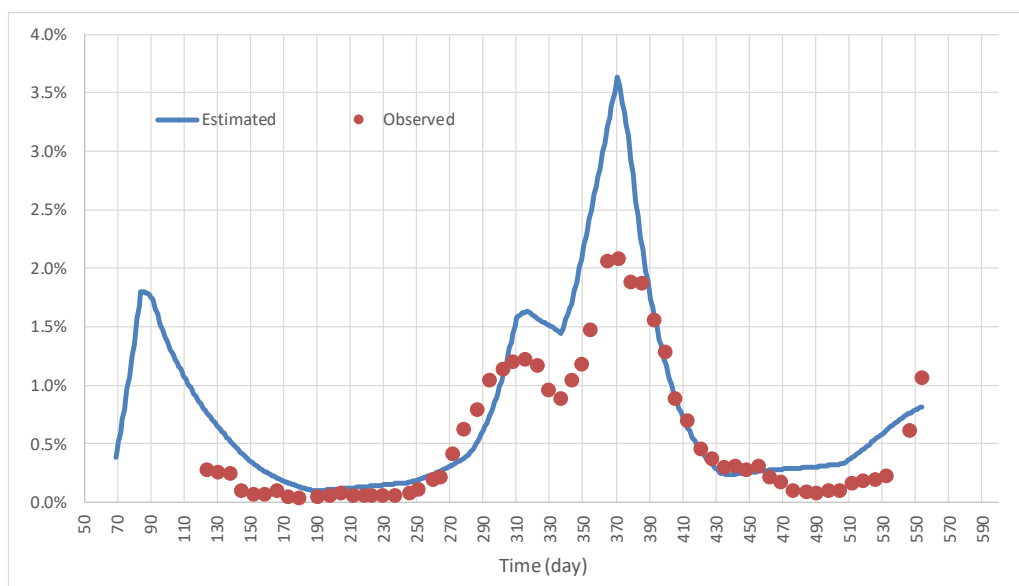



Changes in the estimated numbers of hospitalised COVID-19 patients were of similar trends as the reported numbers of hospitalised patients during 01/2020-01/2021. However, there were considerable differences at peak time points (appendix figure 5), which may be explained by reduced hospitalisation rates during peak period.

**Appendix figure 5: Reported and estimated numbers of hospitalised Covid-19 patients, during 01/2020-01/2021, in England**

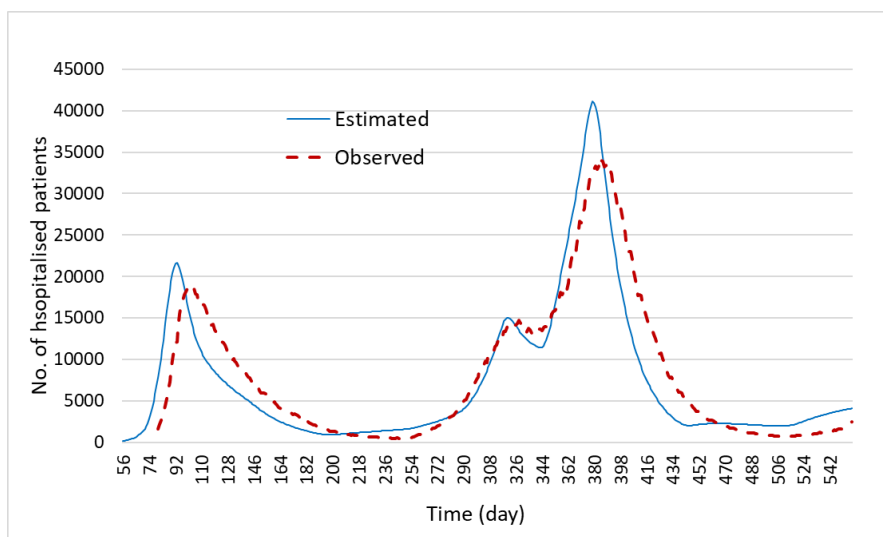

Appendix figure 6 shows that the estimated daily deaths well matched the observed daily deaths from Covid-19, from January 2020 to June 2021, in England.

**Appendix figure 6: Reported and estimated daily deaths from Covid-19, during 01/2020-06/2021, in England**

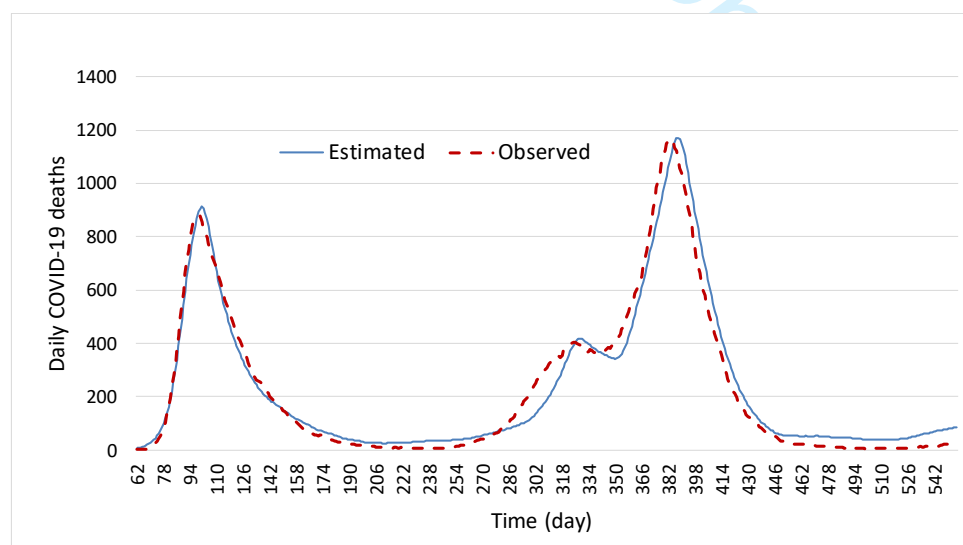

### 3. Vaccination and projection scenarios

We used estimates of transmission parameters, age-specific hospitalisation rates and case fatality rates in June 2021 to project COVID-19 deaths from 2021 to 2024, under various scenarios of vaccine efficacy, durability of both naturally acquired and vaccine induced immunity, and reduction in reinfectivity. There are no more restrictions on social activities since 19 July 2021 in England, and social contacts are return to normal as before the pandemic, but basic hygienic measures would be maintained.

The UK Government's Vaccination Taskforce has recommended rollout of vaccines against COVID-19 to be prioritised primarily by age and comorbidity, with older people being vaccinated first.<sup>22</sup> The Joint Committee on Vaccination and Immunisation (JCVI) in the UK previously recommended COVID-19 vaccination of individuals aged  $\geq 18$ , and also recommended vaccination of young people aged 16-17 years old on 4 August 2021.<sup>23</sup> Vaccination of prioritised individuals began from 8 December 2020 in the UK and around 2 million individuals were vaccinated (mostly with a single dose of Pfizer vaccine) by 10 January 2021.<sup>24</sup> By July 2021, the coverage of individuals who were fully vaccinated (with two doses) was  $>90\%$  in adults aged  $\geq 65$ ,  $80-90\%$  in those aged 50-64,  $60\%$  in adults aged 40-49.<sup>25</sup> For young adults aged 18-39, about  $36\%$  have received the first dose of vaccines by July 2021. Therefore, the vaccination coverage in England has been high in older adults, but it remains uncertain whether such high coverage could be achieved in younger adults. In this study, the mass vaccination is modelled as an age-based phase approach, starting from people aged  $\geq 70$ , followed by individuals aged 60-69, 50-59, 30-49, and then those aged 16-29. We assume that the mass vaccination starts from 1 January 2021, and the maximum number of individuals vaccinated per day is 180,000 in England, to matched with numbers of vaccinated individuals according to the official statistics. In the main analysis, we assume that the uptake rate is  $75\%$ ,  $80\%$ ,  $85\%$  and  $90\%$ , respectively, in adults aged 16-29, 30-39, 40-49, and  $\geq 50$  years old. Because of uncertain coverage of vaccination in younger people, we conducted sensitivity analyses under scenarios with lower ( $60\%$ ,  $70\%$ , and  $80\%$ ) and higher ( $80\%$ ,  $85\%$ , and  $90\%$ ) coverage of vaccination in people aged 16-29, 30-39, and 40-49 years old, respectively.

Results of randomised controlled trials shown that vaccines may be  $>90\%$  efficacious (e.g., Pfizer mRNA vaccine) in reducing severe symptomatic diseases, compared with the placebo group. Assume that  $e_1$  and  $e_2$  are parameters of vaccine's efficacy in blocking virus transmission and reducing symptomatic cases in the infected, respectively (as in appendix figure 2). The reduction in symptomatic cases in the vaccine group may be due to the prevention of infection in susceptible individuals (i.e., infection protection, related to  $e_1$ ), or a lower proportion of infected individuals being symptomatic in the vaccine group (i.e., disease reduction, related to  $e_2$ ), or due to a combination of both. For a vaccine with  $90\%$  efficacy in reducing the number of symptomatic cases (compared with the control group), it is true that  $e_1 \cdot e_2 = (1 - 0.90)$ , or  $e_1 = (1 - 0.90) / e_2$  (note:  $e_1$  and  $e_2 \geq 1$  - overall VE,  $\leq 1$ ). There are many different possible combinations of  $e_1$  and  $e_2$  for an overall efficacy in reducing symptomatic cases. We assume that vaccine efficacy is equally attributable to infection and disease reduction in the main

1  
2 projections. The infection protection (sterilising immunity) after vaccination has been demonstrated. For  
3 example, an observational study in the UK (SIREN) found that the risk of being infected was reduced  
4 by 70% in health workers after a single dose of the Pfizer-BioNTech vaccine.<sup>26,27</sup>  
5  
6

7 Both Pfizer-BioNTech and AstraZeneca vaccines are 2-dose regimens, the policy in the UK has been to  
8 initially provide the first dose to as many individuals as possible to maximise the public health impact.<sup>28</sup>  
9 Exploratory assessment of data from clinical trials found that the short-term vaccine efficacy from the  
10 first dose of the Pfizer-BioNTech vaccine and the AstraZeneca vaccine is about 90% and 70%,  
11 respectively.<sup>28</sup> Public Health England (PHE) in July 2021 estimated that the efficacy was 55-70% after  
12 the first dose, and 70-85% or 85-95% after the second dose.<sup>25</sup> Therefore, we assume that the overall  
13 vaccine efficacy is 62.5% after the first dose and 85% after the second dose. The protection effects start  
14 14 days after the first dose vaccination, and the interval between the first and second dose is 9 weeks.  
15 For vaccines with 62.5% and 85.0% overall efficacy, the equal partial efficacy for the infection  
16 protection and for disease reduction is 38.8% and 61.3%, respectively. The overall vaccine efficacy after  
17 the second dose may be lower than 85.0% due to new variants of SARS-CoV-2 virus. Therefore, we  
18 evaluated two overall vaccine efficacy rates, 62.5% or 85.0%, after the second dose of vaccine.  
19  
20  
21  
22  
23  
24  
25  
26

27 Available evidence has indicated that the duration of sterilising (infection protection) immunity after  
28 coronavirus infection ranges from 0.5 to two years.<sup>1</sup> Serum neutralizing antibodies were detected in all  
29 participants at four months follow up after SAR-CoV-2 mRNA vaccination.<sup>29</sup> Therefore, we assume  
30 that naturally acquired sterilising immunity lasts for 365 or 730 days, and vaccine-induced sterilising  
31 immunity lasts for 182 or 365 days. After waning of sterilising immunity, individuals may be susceptible  
32 again to infection with SARS-CoV-2 virus, but the disease reduction immunity is likely longer lasting.<sup>1</sup>  
33 Due to the existence of disease reduction immunity, the re infectivity of individuals who are reinfected  
34 after waning of sterilising immunity may be reduced. Lavine and colleagues estimated that the secondary  
35 transmissibility (i.e., re infectivity) was 35% of the primary transmissibility (i.e., the re infectivity was  
36 reduced by 65%).<sup>1</sup> Evidence from clinical trials and vaccination in the real world indicated that the viral  
37 loads and the duration of virus shedding in the infected individuals after vaccination were considerably  
38 reduced, compared with unvaccinated individuals.<sup>30,31</sup> Based on preliminary data, PHE estimated that  
39 the re infectivity was reduced by 35-50% after the first dose of vaccines.<sup>25</sup> The reduction in re infectivity  
40 is likely to be larger after the second dose of vaccines. More recent studies reported that fully vaccinated  
41 individuals who were infected were up to 78% less likely to transmit the virus to unvaccinated  
42 individuals.<sup>32</sup> Therefore, we assume a range of the risk of re infectivity after waning of sterilising  
43 immunity; the re infectivity is reduced by 30%, 45% or 60%. We also assume that the infectivity of  
44 ineffectively vaccinated individuals is the same as recovered individuals whose sterilising immunity has  
45 waned, and that vaccination of individuals recovered from natural infection boosts their naturally  
46 acquired immunity.  
47  
48  
49  
50  
51  
52  
53  
54  
55  
56  
57  
58  
59  
60

1  
2 We considered different frequent scenarios of revaccination programmes. First, we evaluated a single  
3 vaccination programme and multiple (2-4) annual vaccination programmes during 2021-2024. In  
4 addition, simulation projections were conducted by revaccination programmes with different intervals,  
5 including 2-6 revaccination programme and corresponding intervals between them.  
6  
7

8  
9 In summary, projection scenarios are defined from the following aspects: vaccine efficacy, frequency  
10 of revaccination programmes, durability of natural and vaccine induced sterilising immunity, reduction  
11 in reinfectivity after the waning of natural and vaccine-induced immunity against reinfection. The main  
12 characteristics of the simulated scenarios are available in supplementary table 1, supplementary table 2  
13 and supplementary table 3.  
14  
15  
16

17  
18 In this study, we focus on deaths in people infected with COVID-19, although our model also produces  
19 estimates of changes in effective reproduction values ( $R_t$ ), numbers of infected and vaccinated  
20 individuals, and hospitalised patients. We performed multiple simulations under various scenarios. For  
21 clarity, we focus on results of selected scenarios in the main text, but report more data on simulation  
22 results in supplementary tables.  
23  
24  
25  
26  
27  
28  
29  
30  
31  
32  
33  
34  
35  
36  
37  
38  
39  
40  
41  
42  
43  
44  
45  
46  
47  
48  
49  
50  
51  
52  
53  
54  
55  
56  
57  
58  
59  
60

## 4. Model's mathematical equations

### Notations:

- subscript used: “s” refers to sex, 1: male, 2: female, 3: both male and female; “a” refers to age group, 1: 0-4 years, 2: 5-9 years, 3: 10-19, ..., 10:  $\geq 80$ ; 11: all age groups. “t” refers to time (day).
- $N$ : The number of the population
- $\lambda_s$ : Force of infection ( $\lambda$ ) measures the risk (probability) of infection transmission, which is a function of transmission rate ( $\beta$ ) and the prevalence of infectious individuals ( $I$ ) among the population ( $N$ ):  $\lambda = \beta \cdot I/N$ .<sup>3</sup>
- $\beta$ : The transmission rate  $\beta$  in this discrete-time model is defined as the average number of individuals infected daily by an infectious person. It is a function of the number of daily close contacts per person ( $c$ ), and the transmission risk per contact between a susceptible and an infectious individual ( $\eta$ ): i.e.,  $\beta = c \cdot \eta$ .<sup>4</sup>
- $\alpha_1$ : rate of progressing from being exposed to being infectious.
- $\alpha_2$ : rate of progressing from being asymptomatic infectious to symptomatic.
- $\mu$ : proportion of infected individuals who will be symptomatic; age-specific
- $infA$ : The fraction of infection force for infected individuals with no or mild symptoms. It was assumed that  $infA=0.5$  in this study.
- $fS_0$ : fraction of symptomatic patients who will not be quarantined.
- $fS_q$ : fraction of symptomatic patients who will be quarantined (self-isolation).
- $fSh$ : fraction of symptomatic patients who will be hospitalised (including ICU admission).
- $\gamma_{A0}$ : rate of recovering for asymptomatic individuals
- $\gamma_{S0}$ : rate of recovering for symptomatic, not isolated/hospitalised patients
- $\gamma_{S1}$ : rate of being isolated in symptomatic patients
- $\gamma_{S2}$ : rate of recovering in isolated patients
- $\gamma_{H1}$ : rate of being hospitalised for symptomatic patients
- $\gamma_{H2}$ : rate of recovering in hospitalised patients
- $v_1$ : rate of vaccinating susceptible individuals
- $v_2$ : rate of vaccinating recovered individuals
- $\rho$ : Relative infectivity of the secondary infection ( $I_2$ ) compared with the primary infection ( $I_1$ ). For example, if  $\rho=0.6$ , the infectivity of  $I_2$  is 40% lower than the infectivity of  $I_1$
- $e_1$ : Relative efficacy of vaccine for sterilising immunity, reducing risk of virus transmission
- $e_2$ : Relative efficacy of vaccine for pathology reduction, reducing the proportion of symptomatic cases after being infected
- $IA$ : Asymptomatic individuals
- $IS$ : Symptomatic patients
- $\gamma_a$ : Average rate of recovering of asymptomatic individuals
- $\gamma_s$ : Average rate of recovering of asymptomatic individuals

- $\omega_v$ : rate of immunity waning in vaccinated individuals
- $\omega_r$ : rate of immunity waning in recovered individuals
- $drOth_{s,a,t}$ : sex, age-specific risk of deaths from causes other than covid-19, specific by week of the year.
- $drCov_{s,a,d}$ : death risk from infected individuals before recovery, specific according to days since being infected.
- $ds0$ ,  $dsq$ , and  $dhos$  are the proportion of covid-19 deaths among symptomatic patients who are not quarantined, those who are isolated, or hospitalised, respectively.  $1=ds0+dsq+dhos$

Sex and age specific population:

$$N_{s,a,t} = SU_{s,a,t} + SUR_{s,a,t} + VAC1_{s,a,t} + EX1_{s,a,t} + I01_{s,a,t} + EX2_{s,a,t} + I02_{s,a,t} + IA_{s,a,t} + IS0_{s,a,t} + ISQ_{s,a,t} + ISH_{s,a,t} + RE_{s,a,m,t} \quad (1)$$

Total number of the primary infection with no symptoms (age-specific):

$$aIA1_{a,t} = \sum_s (IA1_{s,a,t} + I01_{s,a,t} \cdot (1 - \mu_a)) \quad (2)$$

Total number of the primary infections with symptoms, isolated (age-specific):

$$aISQ1_{a,t} = \sum_s (ISQ1_{s,a,t}) \quad (3)$$

Total number of the primary infections with symptoms, not isolated (age-specific):

$$aIS01_{a,t} = \sum_s (IS01_{s,a,t} + I01_{s,a,t} \cdot \mu_a) \quad (4)$$

Total number of the secondary infection with no symptoms (age-specific):

$$aIA2_{a,t} = \sum_s (IA2_{s,a,t} + I02_{s,a,t} \cdot (1 - \mu_a \cdot e_2)) \quad (5)$$

Total number of the secondary infections with symptoms, isolated (age-specific):

$$aISQ2_{a,t} = \sum_s (ISQ2_{s,a,t}) \quad (6)$$

Total number of the secondary infections with symptoms, not isolated (age-specific):

$$aIS02_{a,t} = \sum_s (IS02_{s,a,t} + I02_{s,a,t} \cdot \mu_a \cdot e_2) \quad (7)$$

Sex and age specific susceptible population:

$$SU_{s,a,t+1} = (SU_{s,a,t} - suExp_{s,a,t} - VAC1_{s,a,t}) \cdot (1 - drOth_{s,a,t}) + NewBirth_{s,t} \quad (8)$$

Note:  $drOth_{s,a,t}$  is sex, age-specific death rates for non-covid causes, specific by week of the year.

Newly exposed/infected with SARS-CoV-2 in susceptible individuals:

$$suExp_{s,a,t} = \sum_{j=1}^{10} SU_{s,a,t} \cdot \eta_t \left( \left( Ca_{a,j,t} \cdot \frac{infA \cdot aIA1_{j,t} + aIS1_{j,t}}{N_{s,j,t}} + Cb_{a,j,t} \cdot \frac{aISQ1_{j,t}}{N_{s,j,t}} \right) + \rho \cdot \left( Ca_{a,j,t} \cdot \frac{infA \cdot aIA2_{j,t} + aIS2_{j,t}}{N_{s,j,t}} + Cb_{a,j,t} \cdot \frac{aISQ2_{j,t}}{N_{s,j,t}} \right) \right) \quad (9)$$

Notes:  $Ca_{a,j,t}$  is the average number of general contacts between people aged  $a$  and  $j$ ; and  $Cb_{a,j,t}$  is the average number of household contacts between people age  $a$  and  $j$ .

Newly exposed/infected in vaccinated individuals:

$$vacExp_{s,a,t} = \sum_{j=1}^{10} VAC1_{s,a,t} \cdot \eta_t \cdot e_1 \left( \left( Ca_{a,j,t} \cdot \frac{infA \cdot aIA1_{j,t} + aIS1_{j,t}}{N_{s,j,t}} + Cb_{a,j,t} \cdot \frac{aISQ1_{j,t}}{N_{s,j,t}} \right) + \rho \cdot \left( Ca_{a,j,t} \cdot \frac{infA \cdot aIA2_{j,t} + aIS2_{j,t}}{N_{s,j,t}} + Cb_{a,j,t} \cdot \frac{aISQ2_{j,t}}{N_{s,j,t}} \right) \right) \quad (10)$$

Newly exposed/infected in the recovered or vaccinated after waning of immunity:

$$sureExp_{s,a,t} = \sum_{j=1}^{10} SURE_{s,a,t} \cdot \eta_t \left( \left( Ca_{a,j,t} \cdot \frac{infA \cdot aIA1_{j,t} + aIS1_{j,t}}{N_{s,j,t}} + Cb_{a,j,t} \cdot \frac{aISQ1_{j,t}}{N_{s,j,t}} \right) + \rho \cdot \left( Ca_{a,j,t} \cdot \frac{infA \cdot aIA2_{j,t} + aIS2_{j,t}}{N_{s,j,t}} + Cb_{a,j,t} \cdot \frac{aISQ2_{j,t}}{N_{s,j,t}} \right) \right) \quad (11)$$

The number of the recovered or vaccinated who lose sterilising immunity ( $d$  from 1 to  $tt$ ):

$$SURE_{s,a,t+1} = (SURE_{s,a,t} - sureEXP_{s,a,t}) \cdot (1 - drOth_{s,a,t}) + \sum_{d=1}^{tt} (iRE_{s,a,d,t} \cdot \mu_{r,d} + iVAC1_{s,a,d,t} \cdot \mu_{v,d}) \quad (12)$$

Notes: “ $tt$ ” is the total number of days simulated.  $\mu_{r,d}$  and  $\mu_{v,d}$  are gamma distributed rate of immunity waning, respectively, a function of days since the recovery and vaccination.  $iRE_{s,a,d,t}$  is the number of recovered since  $d$  days from recovery; and  $iVAC1_{s,a,d,t}$  is the number of vaccinated since  $d$  days after vaccination.

The number of new ( $d=1$ ) primary infections in susceptible individuals:

$$iEX1_{s,a,1,t} = suEXP_{s,a,t} \quad (13)$$

The number of new ( $d=1$ ) secondary infections in recovered or vaccinated individuals:

$$iEX2_{s,a,1,t} = sureEXP_{s,a,t} + vacExp_{s,a,t} \quad (14)$$

For  $d=1,2,3\dots 60$  (assuming all will be dead or recovered by day 60 after being infected):

$$iEX1_{s,a,d+1,t+1} = iEX1_{s,a,d,t} \cdot (1 - \alpha1_d) \quad (15)$$

$$iEX2_{s,a,d+1,t+1} = iEX2_{s,a,d,t} \cdot (1 - \alpha1_d) \quad (16)$$

Assumed that covid-19 deaths were from symptomatic patients only. Overall deaths from covid-19 were calculated using the case fatality rates, and timing of covid-19 related deaths were assumed to have a gamma distribution according to days since being infected. Therefore a variable was introduced to record number of symptomatic individuals by days since being exposed/infected to calculate number of covid-19 deaths:

$$iSY_{s,a,t} = \mu_a (suExp_{s,a,t} + e_2 \cdot (surExp_{s,a,t} + vacExp_{s,a,t})) \quad (17)$$

For  $d=1,2,3\dots 60$  (the transmission completed by day 60):

$$iSY_{s,a,d+1,t+1} = iSY_{s,a,d,t} \cdot (1 - drCov_{s,a,d}) \quad (18)$$

The number of covid-19 deaths at time t:

$$dthCov_{s,a,t} = \sum_{d=1}^{60} iSY_{s,a,d,t} \cdot drCov_{s,a,d} \quad (19)$$

The number of new (d=1) primary infections individuals before onset of symptoms:

$$iI01_{s,a,1,t+1} = \sum_{d=1}^{60} iEX1_{s,a,d,t} \cdot \alpha 1_d \quad (20)$$

The number of new (d=1) secondary infectious individuals before onset of symptoms:

$$iI02_{s,a,1,t+1} = \sum_{d=1}^{60} iEX2_{s,a,d,t} \cdot \alpha 1_d \quad (21)$$

For  $d=1,2,3\dots 60$  (the transmission completed by day 60):

$$iI01_{s,a,d+1,t+1} = iI01_{s,a,d,t} \cdot (1 - \alpha 2_d) \quad (22)$$

$$iI02_{s,a,d+1,t+1} = iI02_{s,a,d,t} \cdot (1 - \alpha 2_d) \quad (23)$$

The number of all infectious individuals before onset of symptoms:

$$I0_{s,a,t} = \sum_{d=1}^{60} iI0_{s,a,d,t} \quad (24)$$

The number of new (d=1) infected individuals with no or very mild symptoms:

$$iIA_{s,a,1,t+1} = \sum_{d=1}^{60} (iI01_{s,a,d,t} \cdot \alpha 2_d \cdot (1 - \mu_a) + iI02_{s,a,d,t} \cdot \alpha 2_d \cdot (1 - e_2 \mu_a)) \quad (25)$$

For  $d=1,2,3\dots 60$  (the transmission completed by day 60):

$$iIA_{s,a,d+1,t+1} = iIA_{s,a,d,t} \cdot (1 - \gamma A_d) \quad (26)$$

The number of all infectious individuals with no or mild symptoms:

$$IA_{s,a,t} = \sum_{d=1}^{60} iIA_{s,a,d,t} \quad (27)$$

The number of all new (d=1) symptomatic patients:



$$SYM_{s,a,t+1} = \sum_{d=1}^{60} (iI01_{s,a,d,t} + e_2 \cdot iI02_{s,a,d,t}) \cdot \alpha 2_d \cdot \mu_a \quad (28)$$

The number of new (d=1) symptomatic patients who are not self-isolated:

$$iISO_{s,a,1,t} = SYM_{s,a,t} \cdot fS0_t \quad (29)$$

Symptomatic patients (before being isolated or hospitalised):

$$iISO_{s,a,d+1,t+1} = (iISO_{s,a,d,t} - dthCov_{s,a,t} \cdot ds0_d) \cdot (1 - YS0_d) \quad (30)$$

The number of new (d=1) symptomatic patients being isolated/quarantined:

$$iSQ_{s,a,1,t} = SYM_{s,a,t} \cdot fSq_{a,t} \quad (31)$$

Isolated symptomatic patients:

$$iSQ_{s,a,d+1,t+1} = \sum_{d=1}^{60} (iSQ_{s,a,d,t} - dthCov_{s,a,t} \cdot dsq_d) \cdot (1 - YS1_d) \quad (32)$$

The number of new (d=1) symptomatic patients being hospitalised:

$$iSH_{s,a,1,t} = SYM_{s,a,t} \cdot fSh_{a,t} \quad (33)$$

Hospitalised symptomatic patients:

$$iSH_{s,a,d+1,t+1} = \sum_{d=1}^{60} (iSH_{s,a,d,t} - dthCov_{s,a,t} \cdot dsh_d) \cdot (1 - YH1_d) \quad (34)$$

The number newly recovered people (d=1):

$$iRE_{s,a,1,t+1} = \sum_{d=1}^{60} (iIA_{s,a,d,t} \cdot YA0_d + iISO_{s,a,d,t} \cdot YS0_d + iSQ_{s,a,d,t} \cdot YS2_d + iSH_{s,a,d,t} \cdot YH2_d + VAC2_t) \quad (35)$$

Note:  $VAC2_t$  is the number of newly vaccinated individuals who recovered from previous infections.

All recovered for d=1,2,3...tt:

$$iRE_{s,a,d+1,t+1} = (iRE_{s,a,d,t} - VAC2_t) \cdot (1 - \mu r_d) \cdot (1 - drOth_{s,a,t}) \quad (36)$$

All recovered individuals:

$$RE_{s,a,t} = \sum_{d=1}^{tt} iRE_{s,a,d,t} \quad (37)$$

### Derived reproduction values (R0, Rt)

The basic reproduction ratio (R0) is defined as the average number of individuals infected by a typical infectious individual in a total susceptible population, and effective reproduction ratio (Rt) is the number

of individuals infected by an infectious individual when only a proportion of the population are susceptible and the disease transmission dynamic may be influenced by control measures.<sup>33</sup> R values depend on the risk of infection per contact between an infectious and susceptible person, person-to-person contacts between individuals, the rate of transition from exposed to infectious, infectious period, and the prevalence of susceptible individuals in the population.<sup>3</sup> In this study, we don't use the reproduction ratio directly in simulating the spread of SARS-CoV-2 virus. To facilitate the understanding of effects of different intervention strategies, we estimated R0 and Rt during the simulation period, based on average values of relevant parameters and the calculation method used in a modelling study by Giordano et al.<sup>20</sup>

Average values of relevant parameters for estimating R values:

Weighted average fraction of symptomatic individuals in all infected individuals:

$$fS_t = \sum_a (\mu_a \cdot N_{3,a,t} / N_{3,11,t}) \quad (38)$$

Weighted average fraction of hospitalised symptomatic patients:

$$fH_t = \sum_a (fSH_{a,t} \cdot N_{3,a,t} / N_{3,11,t}) \quad (39)$$

Weighted average fraction of symptomatic patients self-isolated:

$$fQ_t = \sum_a (fSQ_{a,t} \cdot N_{3,a,t} / N_{3,11,t}) \quad (40)$$

Risk of daily transmission per infectious individual, depending on asymptomatic or symptomatic, household isolated or not:

$$\beta I0_t = \sum_{a,j=1}^{10} \mu_t \cdot Ca_{a,j,t} \cdot \frac{N_{j,t}}{N_{3,11,t}} \cdot (infA \cdot (1 - fS_t) + fS_t) \quad (41)$$

$$\beta IA_t = \sum_{a,j=1}^{10} \mu_t \cdot Ca_{a,j,t} \cdot \frac{N_{j,t}}{N_{3,11,t}} \cdot infA \cdot (1 - fS_t) \quad (42)$$

$$\beta SQ_t = \sum_{a,j=1}^{10} \mu_t \cdot Cb_{a,j,t} \cdot \frac{N_{j,t}}{N_{3,11,t}} \cdot (infA \cdot (1 - fS_t) + fS_t) \quad (43)$$

$$\beta S0_t = \sum_{a,j=1}^{10} \mu_t \cdot Ca_{a,j,t} \cdot \frac{N_{j,t}}{N_{3,11,t}} \quad (44)$$

The following transition variables are calculated for estimating R values:

$$d1_t = \alpha 2_t \cdot (1 - fS_t) \quad (45)$$

$$d2_t = \alpha 2_t \cdot fS_t \cdot fS0_t \quad (46)$$

$$d3_t = \alpha 2_t \cdot fS_t \cdot fSQ_t \quad (47)$$

$$d4_t = \alpha 2_t \cdot fS_t \cdot fSH_t \quad (48)$$

$$dA1_t = d1_t + d2_t + d3_t + d4_t \quad (49)$$

$$d5_t = \alpha 2_t \cdot (1 - fS_t \cdot e_2) \quad (50)$$

$$d6_t = \alpha 2_t \cdot fS_t \cdot fS0_t \cdot e_2 \quad (51)$$

$$d7_t = \alpha 2_t \cdot fS_t \cdot fSQ_t \cdot e_2 \quad (52)$$

$$d8_t = \alpha 2_t \cdot fS_t \cdot fSH_t \cdot e_2 \quad (53)$$

$$dA2_t = d5_t + d6_t + d7_t + d8_t \quad (54)$$

Effective reproductive value (Rt):

$$Rt = \frac{SU_{3,11,t}}{N_{3,11,t}} \left( \beta I0_t \cdot \frac{1}{dA1_t} + \beta IA_t \cdot \frac{d1_t}{dA1_t \cdot \gamma A0_t} + \beta S0_t \cdot \frac{d2_t}{dA1_t \cdot \gamma S0_t} + \beta SQ_t \cdot \frac{d3_t}{dA1_t \cdot \gamma S1_t} + \beta SH_t \cdot \frac{d4_t}{dA1_t \cdot \gamma H1_t} \right) + \left( \frac{SUR e_{3,11,t}}{N_{3,11,t}} + \frac{VAC_{13,11,t}}{N_{3,11,t}} \cdot e_1 \right) \cdot \rho \cdot \left( \beta I0_t \cdot \frac{1}{dA2_t} + \beta IA_t \cdot \frac{d5_t}{dA2_t \cdot \gamma A0_t} + \beta S0_t \cdot \frac{d6_t}{dA2_t \cdot \gamma S0_t} + \beta SQ_t \cdot \frac{d7_t}{dA2_t \cdot \gamma S1_t} + \beta SH_t \cdot \frac{d8_t}{dA2_t \cdot \gamma H1_t} \right) \quad (55)$$

## 5. References for supplementary material

1. Lavine JS, Bjornstad ON, Antia R. Immunological characteristics govern the transition of COVID-19 to endemicity. *Science (New York, NY)* 2021;371(6530):741-45. doi: 10.1126/science.abe6522 [published Online First: 2021/01/14]
2. Olliaro P. What does 95% COVID-19 vaccine efficacy really mean? *Lancet Infect Dis* 2021 doi: 10.1016/s1473-3099(21)00075-x [published Online First: 2021/02/21]
3. Rock K, Brand S, Moir J, et al. Dynamics of infectious diseases. *Rep Prog Phys* 2014;77(2):026602. doi: 10.1088/0034-4885/77/2/026602 [published Online First: 2014/01/22]
4. Tuckwell HC, Williams RJ. Some properties of a simple stochastic epidemic model of SIR type. *Math Biosci* 2007;208(1):76-97. doi: 10.1016/j.mbs.2006.09.018 [published Online First: 2006/12/19]
5. Grant A. Dynamics of COVID-19 epidemics: SEIR models underestimate peak infection rates and overestimate epidemic duration. *medRxiv preprint* doi: <https://doi.org/10.1101/2020040220050674> 2020
6. Krylova O, Earn DJD. Effects of the infectious period distribution on predicted transitions in childhood disease dynamics. *J R Soc Interface* 2013;10(84):20130098-98. doi: 10.1098/rsif.2013.0098
7. Davies NG, Kucharski AJ, Eggo RM, et al. Effects of non-pharmaceutical interventions on COVID-19 cases, deaths, and demand for hospital services in the UK: a modelling study. *The Lancet Public health* 2020;5(7):e375-e85. doi: 10.1016/s2468-2667(20)30133-x [published Online First: 2020/06/06]
8. GOV.UK. Coronavirus (COVID-19) in the UK 2021 [Available from: <https://coronavirus.data.gov.uk/> accessed 31 July 2021.
9. Davies NG, Klepac P, Liu Y, et al. Age-dependent effects in the transmission and control of COVID-19 epidemics. *Nature medicine* 2020;26(8):1205-11. doi: 10.1038/s41591-020-0962-9 [published Online First: 2020/06/18]
10. Zhang J, Litvinova M, Wang W, et al. Evolving epidemiology and transmission dynamics of coronavirus disease 2019 outside Hubei province, China: a descriptive and modelling study. *Lancet Infect Dis* 2020 doi: 10.1016/s1473-3099(20)30230-9 [published Online First: 2020/04/06]
11. Ferguson N, Laydon D, Nedjati-Gilani G, et al. Impact of non-pharmaceutical interventions (NPIs) to reduce COVID-19 mortality and healthcare demand.: Imperial College COVID-19 Response Team., 2020.
12. Verity R, Okell LC, Dorigatti I, et al. Estimates of the severity of coronavirus disease 2019: a model-based analysis. *Lancet Infect Dis* 2020 doi: 10.1016/s1473-3099(20)30243-7 [published Online First: 2020/04/03]
13. Chinese Center of Disease Prevention and Control. [The epidemiological characteristics of an outbreak of 2019 novel coronavirus diseases (COVID-19) in China]. *Zhonghua Liu Xing Bing Xue Za Zhi* 2020;41(2):145-51. doi: 10.3760/cma.j.issn.0254-6450.2020.02.003 [published Online First: 2020/02/18]
14. Li F, Li YY, Liu MJ, et al. Household transmission of SARS-CoV-2 and risk factors for susceptibility and infectivity in Wuhan: a retrospective observational study. *Lancet Infect Dis* 2021;21(5):617-28. doi: 10.1016/s1473-3099(20)30981-6 [published Online First: 2021/01/22]

15. Gov.uk. Slides and datasets to accompany coronavirus press conference: 5 June 2020. Published 5 June 2020 ed, 2020.
16. Mossong J, Hens N, Jit M, et al. Social contacts and mixing patterns relevant to the spread of infectious diseases. *PLoS Med* 2008;5(3):e74. doi: 10.1371/journal.pmed.0050074 [published Online First: 2008/03/28]
17. Prem K, Cook AR, Jit M. Projecting social contact matrices in 152 countries using contact surveys and demographic data. *PLoS Comput Biol* 2017;13(9):e1005697. doi: 10.1371/journal.pcbi.1005697 [published Online First: 2017/09/13]
18. Office for National Statistics. Dataset: 2018-based National population projections table of contents, 2018.
19. Mahase E. Covid-19: What have we learnt about the new variant in the UK? *Bmj* 2020;371:m4944. doi: 10.1136/bmj.m4944 [published Online First: 2020/12/29]
20. Giordano G, Blanchini F, Bruno R, et al. Modelling the COVID-19 epidemic and implementation of population-wide interventions in Italy. *Nature medicine* 2020;26(6):855-60. doi: 10.1038/s41591-020-0883-7 [published Online First: 2020/04/24]
21. Gov.uk. Official Statistics. UK Biobank COVID-19 antibody study: round 1 results. : Department of Health & Social Care [Available from: <https://www.gov.uk/government/publications/uk-biobank-covid-19-seroprevalence-study-round-1-results/uk-biobank-covid-19-seroprevalence-study-round-1-results> accessed Published 30 July 2020. .
22. Bingham K. The UK Government's Vaccine Taskforce: strategy for protecting the UK and the world. *Lancet* 2020 doi: 10.1016/s0140-6736(20)32175-9 [published Online First: 2020/10/31]
23. Department of Health & Social Care JCVI statement, August 2021: COVID-19 vaccination of children and young people aged 12 to 17 years.: Department of Health & Social Care 2021 [Available from: <https://www.gov.uk/government/organisations/department-of-health-and-social-care>.
24. Mahase E. Covid-19: UK approves Pfizer and BioNTech vaccine with rollout due to start next week. 2020;371:m4714. doi: 10.1136/bmj.m4714 %J BMJ
25. PHE. COVID-19 vaccine surveillance report Week 28: Public Health England 2021.
26. Hall ea. Effectiveness of BNT162b2 mRNA Vaccine Against Infection and COVID-19 Vaccine Coverage in Healthcare Workers in England, Multicentre Prospective Cohort Study (the SIREN Study). *Lancet (preprint)* 2021
27. Ramsay M. COVID-19: analysing first vaccine effectiveness in the UK 2021 [updated 23 February 2021. Available from: <https://publichealthmatters.blog.gov.uk/2021/02/23/covid-19-analysing-first-vaccine-effectiveness-in-the-uk/>.
28. Department of Health and Social Care. Optimising the covid-19 vaccination programme for maximum short-term impact. 2021 [Available from: <https://www.gov.uk/government/publications/prioritising-the-first-covid-19-vaccine-dose-jcvi-statement/optimising-the-covid-19-vaccination-programme-for-maximum-short-term-impact>.
29. Widge AT, Roupheal NG, Jackson LA, et al. Durability of Responses after SARS-CoV-2 mRNA-1273 Vaccination. *The New England journal of medicine* 2021;384(1):80-82. doi: 10.1056/NEJMc2032195 [published Online First: 2020/12/04]
30. Levine-Tiefenbrun M, Yelin I, Katz R, et al. Decreased SARS-CoV-2 viral load following vaccination. 2021:2021.02.06.21251283. doi: 10.1101/2021.02.06.21251283 %J medRxiv

- 1  
2 31. Emary KRW, Golubchik T, Aley PK, et al. Efficacy of ChAdOx1 nCoV-19 (AZD1222) Vaccine Against  
3 SARS-CoV-2 VOC 202012/01 (B.1.1.7). SSRN [Preprint]. 2021. DOI: 10.2139/ssrn.3779160.  
4 Available at: [https://paperssrncom/sol3/paperscfm?abstract\\_id=3779160](https://paperssrncom/sol3/paperscfm?abstract_id=3779160) 2021  
5  
6 32. Mallapaty S. COVID vaccines slash viral spread - but Delta is an unknown. *Nature* 2021 doi:  
7 10.1038/d41586-021-02054-z [published Online First: 2021/07/30]  
8  
9 33. Liu QH, Ajelli M, Aleta A, et al. Measurability of the epidemic reproduction number in data-driven  
10 contact networks. *Proceedings of the National Academy of Sciences of the United States of*  
11 *America* 2018;115(50):12680-85. doi: 10.1073/pnas.1811115115 [published Online First:  
12 2018/11/23]  
13  
14  
15  
16  
17  
18  
19  
20  
21  
22  
23  
24  
25  
26  
27  
28  
29  
30  
31  
32  
33  
34  
35  
36  
37  
38  
39  
40  
41  
42  
43  
44  
45  
46  
47  
48  
49  
50  
51  
52  
53  
54  
55  
56  
57  
58  
59  
60

For peer review only

# BMJ Open

## Vaccination against COVID-19 and society's return to normality in England: a modelling study of impacts of different types of naturally acquired and vaccine induced immunity

|                                 |                                                                                                                                   |
|---------------------------------|-----------------------------------------------------------------------------------------------------------------------------------|
| Journal:                        | <i>BMJ Open</i>                                                                                                                   |
| Manuscript ID                   | bmjopen-2021-053507.R2                                                                                                            |
| Article Type:                   | Original research                                                                                                                 |
| Date Submitted by the Author:   | 27-Sep-2021                                                                                                                       |
| Complete List of Authors:       | Song, Fujian; University of East Anglia Norwich Medical School<br>Bachmann, Max; University of East Anglia Norwich Medical School |
| <b>Primary Subject Heading</b>: | Infectious diseases                                                                                                               |
| Secondary Subject Heading:      | Public health, Epidemiology                                                                                                       |
| Keywords:                       | COVID-19, Infection control < INFECTIOUS DISEASES, Public health < INFECTIOUS DISEASES, Immunology < NATURAL SCIENCE DISCIPLINES  |
|                                 |                                                                                                                                   |

SCHOLARONE™  
Manuscripts

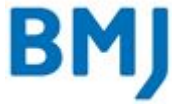

I, the Submitting Author has the right to grant and does grant on behalf of all authors of the Work (as defined in the below author licence), an exclusive licence and/or a non-exclusive licence for contributions from authors who are: i) UK Crown employees; ii) where BMJ has agreed a CC-BY licence shall apply, and/or iii) in accordance with the terms applicable for US Federal Government officers or employees acting as part of their official duties; on a worldwide, perpetual, irrevocable, royalty-free basis to BMJ Publishing Group Ltd ("BMJ") its licensees and where the relevant Journal is co-owned by BMJ to the co-owners of the Journal, to publish the Work in this journal and any other BMJ products and to exploit all rights, as set out in our [licence](#).

The Submitting Author accepts and understands that any supply made under these terms is made by BMJ to the Submitting Author unless you are acting as an employee on behalf of your employer or a postgraduate student of an affiliated institution which is paying any applicable article publishing charge ("APC") for Open Access articles. Where the Submitting Author wishes to make the Work available on an Open Access basis (and intends to pay the relevant APC), the terms of reuse of such Open Access shall be governed by a Creative Commons licence – details of these licences and which [Creative Commons](#) licence will apply to this Work are set out in our licence referred to above.

Other than as permitted in any relevant BMJ Author's Self Archiving Policies, I confirm this Work has not been accepted for publication elsewhere, is not being considered for publication elsewhere and does not duplicate material already published. I confirm all authors consent to publication of this Work and authorise the granting of this licence.



1  
2  
3  
4  
5 **Vaccination against COVID-19 and society's return to normality in**  
6 **England: a modelling study of impacts of different types of naturally**  
7 **acquired and vaccine induced immunity**  
8  
9  
10  
11  
12  
13  
14

15 Fujian Song<sup>1</sup>, Max O. Bachmann<sup>1</sup>

16  
17  
18 1. Norwich Medical School, University of East Anglia, Norwich, Norfolk, NR4 7TJ  
19  
20

21 Correspondence to: Fujian Song, email: [fujian.song@uea.ac.uk](mailto:fujian.song@uea.ac.uk)  
22  
23  
24  
25  
26  
27  
28  
29  
30  
31  
32  
33  
34  
35  
36  
37  
38  
39  
40  
41  
42  
43  
44  
45  
46  
47  
48  
49  
50  
51  
52  
53  
54  
55  
56  
57  
58  
59  
60

## ABSTRACT

**Objectives:** To project impacts of mass vaccination against COVID-19, and investigate possible impacts of different types of naturally acquired and vaccine-induced immunity on future dynamics of SARS-CoV-2 transmission from 2021 to 2024 in England.

**Design:** Deterministic, compartmental, discrete-time SEIR modelling.

**Participants:** Population in England.

**Interventions:** mass vaccination programmes.

**Outcome measures:** daily and cumulative number of deaths from COVID-19.

**Results:** If vaccine efficacy remains high (85%), the vaccine-induced sterilising immunity lasts  $\geq 182$  days, and the reinfectivity is greatly reduced (by  $\geq 60\%$ ), annual mass vaccination programmes can prevent further COVID-19 outbreaks in England. Under optimistic scenarios, with annual revaccination programmes, the cumulative number of COVID-19 deaths is estimated to be from 130,000 to 150,000 by the end of 2024. However, the total number of COVID-19 deaths may be up to 431,000 by the end of 2024, under scenarios with compromised vaccine efficacy (62.5%), short duration of natural and vaccine immunity (365/182 days), and small reduction in reinfectivity (30%). Under the assumed scenarios, more frequent revaccinations are associated with smaller total numbers and lower peaks of daily deaths from COVID-19.

**Conclusions:** Under optimistic scenarios, mass immunisation using efficacious vaccines may enable society safely to return to normality. However, under plausible scenarios with low vaccine efficacy and short durability of immunity, COVID-19 could continue to cause recurrent waves of severe morbidity and mortality despite frequent vaccinations. It is crucial to monitor the vaccination effects in the real world, and to better understand characteristics of naturally acquired and vaccine induced immunity against SARS-CoV-2.

## ARTICLE SUMMARY:

### Strengths and limitations of this study

- This is the first modelling study to explicitly investigate the impacts of different types of immune responses to SARS-CoV-2 infection and vaccines on the COVID-19 epidemic in England.
- The model has been calibrated based on historically observed data in England, and plausible futures are explored via a large number of projection scenarios.
- This is a deterministic model to answer “what-if” questions, and uncertainty in estimated parameters may have not been fully accommodated.
- There remain many uncertainties regarding durability and types of naturally acquired and vaccine-induced immunity against SARS-CoV-2 virus.

## INTRODUCTION

The COVID-19 pandemic caused by the spread of SARS-CoV-2 virus has resulted in more than 4.2 million deaths globally by the end of July 2021,<sup>1</sup> and severe disruptions of economies and social activities around the world. The spread of the SARS-CoV-2 virus can be suppressed by non-pharmaceutical interventions (NPIs) and lockdown measures.<sup>2</sup> Because of their disruptive socioeconomic consequences, lockdown restrictions cannot last indefinitely.

Only a few months after the initial identification of SARS-CoV-2 pathogen, there were more than 200 vaccine candidates in development globally.<sup>3</sup> Results of randomised controlled trials shown that vaccines were efficacious in reducing symptomatic diseases, compared with placebo.<sup>4,5</sup> Between 3 December 2020 and 31 July 2021, four vaccines against COVID-19 were approved for emergency use in the UK, and a vaccination programme has been started to rollout since 8 December 2020, prioritised primarily by age and comorbidity, with older people being vaccinated first.<sup>6</sup> By 30 July 2021, the coverage rate of vaccination in adults aged  $\geq 18$  in the UK was 88.5% for dose-1 and 72.1% for dose-2 of COVID-19 vaccines.<sup>7</sup> Although the number of people infected with SARS-CoV-2 virus in the UK was large during June-July 2021, numbers of hospitalised COVID-19 patients and related deaths had remained relatively low, partly due to the protection of vaccines. For example, there were more than 56,000 cases tested positive reported on 15 July 2021, while daily hospital admissions of patients with COVID-19 ranged from 593 to 836 during 15-31 July 2021, and the reported daily deaths due to COVID-19 ranged from 39 to 92 during the same period in England.<sup>7</sup> Therefore, lockdown restrictions in England have been mostly lifted since 19 July 2021.<sup>8</sup> Although mass vaccination is a promising strategy to enable society to safely return to normality, without mandatory NPIs, there is great uncertainty about the effects of COVID-19 vaccines and society's return to normality, including vaccines' long-term efficacy and emerging new variants of SARS-CoV-2 virus.<sup>9,10</sup>

There have been many mathematical modelling studies to investigate COVID-19 dynamics and the impacts of control measures (for example <sup>11-13</sup>). Several modelling studies evaluated impacts of vaccines on the dynamics and consequences of COVID-19 epidemics in the UK.<sup>14-17</sup> Two of these studies assessed impacts of the relaxation of social restriction after vaccination in the UK,<sup>15,16</sup> and one study assessed impacts of vaccination on hospital admissions,<sup>17</sup> but covered a shorter time horizon and did not consider waning of immunity. Another study of SARS-CoV-2 vaccination in the UK focused on economic evaluations.<sup>17</sup> There have been some published modelling studies of vaccination against COVID-19 in other countries. For example, a modelling study examined the nation-wide vaccination and returning to normal life in the United States of America (USA), finding that vaccination alone was insufficient and NPI measures were still required.<sup>18</sup>

1  
2 The protection of naturally acquired or vaccine-induced immune responses may be attributable to  
3 infection protection, disease reduction, and reinfectivity reduction.<sup>19</sup> Studies of diseases caused by  
4 other human coronaviruses (HCoVs) indicated that infection protection immunity is likely to be short-  
5 lived, while disease reduction and reinfectivity reduction are likely long lasting.<sup>20</sup> We are not aware of  
6 modelling studies that considered these important immunity characteristics in the evaluation of  
7 national mass vaccination programmes against COVID-19 epidemics. Therefore, we conducted a  
8 modelling study to investigate possible impacts of different types of naturally acquired and vaccine-  
9 induced immunity on future dynamics of SARS-CoV-2 transmission in England.  
10  
11  
12  
13  
14  
15  
16  
17

## 18 **METHODS**

### 21 **Model structure**

23 This is a deterministic, compartmental, discrete-time (day) population dynamic model, implemented  
24 with computational language R.<sup>21</sup> The population are classified into categories by sex, age (5-year age  
25 bands for age <10 years, and 10-year age bands for age ≥10 years), and COVID-19 infection status  
26 (figure 1). The main infection compartments include susceptible, exposed, infectious, recovered, and  
27 vaccinated. Here “exposed” refers to a pre-infectious status of infected individuals. Infected  
28 individuals are classified as asymptomatic or symptomatic, and symptomatic individuals are classified  
29 as not being isolated, self-isolated, and hospitalised. We assume that hospitalised patients are  
30 effectively isolated and no longer able to transmit the virus to the general population, but patients  
31 who self-isolate at home may transmit virus to household contacts. The recovered and effectively  
32 vaccinated are protected from reinfection, but they may be reinfected if the immunity is short-lived.  
33  
34  
35  
36  
37  
38  
39  
40

### 41 **Parameters and data sources**

43 Details on the model’s structure (appendix figure 1), parameters, data sources (appendix table 1),  
44 and mathematical equations are available in Supplementary files. Initial parameter values were  
45 estimated based on a review of relevant literature, and key parameter estimates were calibrated so  
46 that the simulated numbers of COVID-19 deaths, hospitalised patients, and infected individuals were  
47 as similar as possible to historically reported data from March 2020 to June 2021 in England.<sup>22</sup>  
48  
49  
50  
51

52 We obtained population demographic statistics in England from the Office for National Statistics,<sup>23</sup>  
53 and the whole population is assumed to be susceptible to SARS-CoV-2 infection at the beginning of  
54 2020. We assume incubation periods, infectious periods, days of hospital stay, and days of deaths  
55 after being infected, to be gamma distributed (appendix table 1 in supplementary files).<sup>11 24 25</sup> Age  
56 specific case fatality rates and hospitalisation rates of symptomatic cases were based on a study by  
57 Verity et al.<sup>25</sup> Average sex-and-age-specific rates of all-cause deaths from 2015 to 2019 in England<sup>23</sup>  
58  
59  
60

1  
2 are applied to people who are not infected with or recovered from COVID-19. We assumed that the  
3 number of births equals to the number of deaths each day, and did not consider the influence of  
4 population migration. We adjusted the number of individuals belonging to each age group at the  
5 beginning of a year since 2021, by shifting a proportion of them to the adjacent higher age group.  
6  
7

8  
9 Effects of NPI measures, including restrictions on social activities, contact tracing and testing, were  
10 materialised by changes in transmission risk per contact between a susceptible and an infectious  
11 individual,<sup>26</sup> and average numbers of contacts of the general population (appendix table 1 in  
12 supplementary files). We estimate that the transmission risk per contact between infectious and  
13 susceptible individuals was reduced by 30%, from 0.094 before the implementation of any NPIs to  
14 0.066 by March 15, 2020 after implementing basic NPI measures. Because of the new virus variants,<sup>27</sup>  
15 the average transmission risk per contact was increased to 0.077 by the end of 2020, and 0.081 since  
16 June 2021. We assume that, since September 2021, the transmission risk per contact is 10% higher in  
17 September, October, March and April, and 20% higher in the winter months of November,  
18 December, January and February, compared with the risk in summer months from May to August.<sup>28</sup>  
19 We do not use the reproduction number as an input parameter, but derived the basic and effective  
20 reproduction numbers based on model's transmission parameters (equation 55 in Supplementary  
21 files).<sup>13 26</sup>  
22  
23

24  
25 The sex-and-age-specific numbers of daily contacts per person were based on the UK data from a  
26 study of European countries.<sup>29</sup> We consider only the daily contacts of the general population and  
27 household contacts of individuals self-isolated at home. We estimated that the lockdown measures  
28 from 24 March 2020 reduced general population contacts by 60-85%, although household contacts  
29 were unchanged. The NPI measures were relaxed or strengthened over time, which were reflected in  
30 the assumed social contacts and transmission risk (Supplementary files). Social contacts in England  
31 since 19 July 2021 are return to normal as before the pandemic in England, although some basic  
32 hygienic measures would be maintained.  
33  
34  
35  
36  
37  
38  
39  
40  
41  
42  
43  
44  
45

### 46 **Vaccination and projection scenarios**

47  
48 Vaccination of prioritised individuals began from 8 December 2020 in England.<sup>30</sup> The Joint Committee  
49 on Vaccination and Immunisation (JCVI) in the UK previously recommended COVID-19 vaccination of  
50 individuals aged  $\geq 18$ , and also recommended vaccination of young people aged 16-17 years old on 4  
51 August 2021.<sup>31</sup> The vaccine uptake rate in adults aged  $\geq 18$  was 88.5% for dose-1 and 72.1% for dose-  
52 2 by 30 July 2021,<sup>22</sup> and the coverage with two does was  $>90\%$  in adults aged  $\geq 65$ , 80-90% in those  
53 aged 50-64, and around 60% in those aged 40-49.<sup>32</sup> In this study, the mass vaccination is modelled as  
54 an age-based phase approach, starting from people aged  $\geq 70$ , followed by individuals aged 60-69, 50-  
55 59, 30-49, and then those aged 16-29 years old. We assume that the mass vaccination starts from 1  
56  
57  
58  
59  
60

1  
2 January 2021, and the maximum number of individuals vaccinated daily is 180,000, to matched with  
3 numbers of vaccinated individuals according to the official statistics. In the main analysis, we assume  
4 that the uptake rate is 75%, 80%, 85% and 90%, respectively, in adults aged 16-29, 30-39, 40-49, and  
5  $\geq 50$  years old. Because of uncertain coverage of vaccination in younger people, we conducted  
6 sensitivity analyses under scenarios with lower (60%, 70%, and 80%) and higher (80%, 85%, and 90%)  
7 coverage of vaccination in people aged 16-29, 30-39, and 40-49 years old, respectively.  
8  
9

10  
11  
12 Both Pfizer-BioNTec and AstraZeneca vaccines are 2-dose regimens, and the policy in the UK has  
13 been to initially provide the first dose to as many adults as possible. Data from clinical trials indicated  
14 that the short-term vaccine efficacy after the first dose of the Pfizer-BioNTech and the AstraZeneca  
15 vaccine is about 90% and 70%, respectively.<sup>4</sup> Public Health England (PHE) in July 2021 estimated that  
16 the efficacy was 55-70% after the first dose, and 70-85% or 85-95% after the second dose.<sup>32</sup> In this  
17 study, we assume that the overall vaccine efficacy is 62.5% after the first dose and 85% after the  
18 second dose. The protection effects start 14 days after the first dose vaccination, and the interval  
19 between the first and second dose is nine weeks. The overall vaccine efficacy after the second dose  
20 may be lower than 85.0% due to new variants of SARS-CoV-2 virus. Therefore, we assume a scenario  
21 in which the vaccine efficacy is reduced by new viral variants, to be 44.0% after the first dose and  
22 62.5% after the second dose, during 2022-2024.  
23  
24  
25  
26  
27  
28  
29  
30

31  
32 The reduction in symptomatic cases in vaccinated individuals may be due to induced antibodies in  
33 susceptible individuals (infection protection), or a reduction in symptomatic cases among infected  
34 individuals (disease reduction), or a combination of both. There are many different possible  
35 combinations of infection protection and disease reduction for a given overall vaccine efficacy in  
36 reducing symptomatic cases (appendix figure 2 in supplementary files). We assume that vaccine  
37 efficacy for reducing symptomatic cases is equally attributable to infection reduction and disease  
38 reduction in the main projections. For vaccines with 62.5% and 85.0% overall efficacy, the equal  
39 partial efficacy for the infection protection and for disease reduction is 38.8% and 61.3%,  
40 respectively (see Supplementary files for details).  
41  
42  
43  
44  
45  
46

47  
48 Immune responses against COVID-19 infection, either naturally acquired from prior infection or  
49 vaccine-induced, may reduce individuals' susceptibility to infection (infection protection or sterilising  
50 immunity), reduce pathology so that disease is less severe after being infected (disease reduction  
51 immunity), and reduce infectivity of those who are reinfected after the waning of immunity  
52 (reinfectivity reduction immunity).<sup>19</sup> According to immunological characteristics of other HCoVs,  
53 infection protection immunity may wane after a short period, while disease protection and  
54 reinfectivity reduction immunity are likely longer lasting.<sup>20</sup> For example, antibodies against SARS-  
55 CoV-1 virus in recovered patients was no longer detectable after 2-3 years, while specific memory T  
56 cells remained detected after 11 years.<sup>33</sup> Therefore, we assume that the disease reduction and  
57  
58  
59  
60

1  
2 reinfecitivity reduction immunity are long lasting (>4 years).<sup>20</sup> We assume that naturally acquired  
3 sterilising immunity lasts for 365 or 730 days, and vaccine-induced sterilising immunity lasts for 182  
4 or 365 days. Available evidence indicated that the viral loads and the duration of virus shedding in  
5 the infected individuals after vaccination were considerably reduced, compared with unvaccinated  
6 individuals.<sup>34 35</sup> Public Health England in July 2021 estimated that the reinfecitivity was reduced by 35-  
7 50% after the first dose of vaccines,<sup>32</sup> although it is possible that the reduction in reinfecitivity may be  
8 larger than 35-50% after the second dose of vaccines. More recent studies reported that fully  
9 vaccinated individuals who were infected were between 41% and 78% less likely to transmit the virus  
10 to unvaccinated individuals.<sup>36</sup> In this study, we assume that reinfecitivity after waning of sterilising  
11 immunity is reduced by 30%, 45% or 60%. We also assume that the infecitivity of ineffectively  
12 vaccinated individuals is the same as recovered individuals whose sterilising immunity has waned,  
13 and vaccination of individuals recovered from natural infection boosts their naturally acquired  
14 immunity.

15  
16 We considered scenarios with different frequency of revaccination programmes, including a single  
17 vaccination programme, multiple (2-4) annual revaccinations, and revaccination programmes with  
18 different frequency and time intervals. The main characteristics of the simulated scenarios are  
19 summarised in supplementary table 1, supplementary table 2 and supplementary table 3.

20  
21 We run the model and calibrate key transmission parameters by visually comparing estimated  
22 numbers of daily COVID-19 deaths, and hospitalised patients, with official records from 1 January  
23 2020 to 30 June 2021 in England.<sup>22</sup> We used estimates of transmission parameters by the end of June  
24 2021 to project COVID-19 deaths from 2021 to 2024, under various scenarios of vaccine efficacy,  
25 durability and protection characteristics of naturally acquired and vaccine-induced immunity. The  
26 number of deaths from SARS-CoV-2 infections is the main endpoint in this study.

### 27 **Patient and public involvement**

28  
29 No patients and the public were involved in this literature and secondary data based, computational  
30 modelling study.

## 31 **RESULTS**

32  
33 Our derived basic reproduction number ( $R_0$ ) was 3.68 at the initial stage of the COVID-19 epidemic in  
34 England. After implementing NPI and lockdown measures, the effective reproduction value ( $R_t$ ) was  
35 reduced to 0.66 after 24 March 2020. Thereafter, the  $R_t$  values fluctuated along with changing NPI  
36 policies, and our estimated  $R$  values were within the ranges reported in England (Appendix figure 3 in  
37 Supplementary files).<sup>37</sup> The estimated prevalence of SARS-CoV-2 infection (appendix figure 4), the



1  
2 number of hospitalised COVID-19 patients (appendix figure 5), and the estimated daily deaths from  
3 COVID-19 (appendix figure 6) are well matched with the reported data from March 2020 to June  
4 2021 in England (Supplementary files).  
5  
6

### 7 **Vaccine efficacy, immunity durability, and reinfectivity**

9  
10 Figure 2 shows the impacts of partial vaccine efficacy regarding disease reduction relative to  
11 infection protection, durability of immunity, and reinfectivity, given the same overall vaccine efficacy  
12 in reducing symptomatic cases. There are three general inferences. As expected, the number of  
13 COVID-19 deaths is smaller following a greater reduction in reinfectivity (figure 2A, 2B, 2C). Second, a  
14 greater reduction in reinfectivity makes the durability of immunity less influential, if a vaccine is  
15 efficacious for infection protection (figure 2c). Third, the impacts of partial efficacy of infection  
16 protection relative to disease reduction by a vaccine is substantial when the duration of immunity is  
17 short-lasting. A combination of a shorter duration of immunity and smaller reduction in the  
18 reinfectivity makes the disease reduction efficacy more beneficial (figure 2A, 2B).  
19  
20  
21  
22  
23  
24  
25

### 26 **Population susceptibility and COVID-19 outbreaks**

27  
28 Changes in the prevalence of susceptible individuals and daily peaks of COVID-19 deaths in England  
29 during 2020 and 2024 are shown in figure 3, under assumptions of 85% vaccine efficacy after the  
30 second dose, 45% reduction in reinfectivity after waning of sterilising immunity, and different  
31 durations of sterilising immunity.  
32  
33  
34

35  
36 The overall prevalence of susceptible individuals is reduced to around 25% by August 2021, after a  
37 single wave of mass vaccination starting from January 2021. It starts to increase to above 70% by  
38 December 2022, if the duration of natural and vaccine-induced immunity is 730 and 365 days,  
39 respectively (figure 3A). The raised prevalence of susceptible individuals leads to an outbreak with a  
40 high peak (n=627) of daily COVID-19 deaths in May 2023. The prevalence of the susceptible is  
41 reduced from 74% to 68% by the natural infection during the outbreak, then slightly increases again  
42 (69%) due to waning of immunity. After the outbreak wave in January 2024, the prevalence of the  
43 susceptible is reduced to around 60% (figure 3A). Two waves of repeated annual revaccination  
44 programmes delay the new outbreak, with a peak of daily COVID-19 deaths (n=731) in May 2024  
45 (figure 3B). Four repeated waves of annual revaccination programmes almost prevent any new  
46 outbreaks before the end of 2024, with no more than 50 daily COVID-19 deaths during 2022-2024  
47 (figure 3C).  
48  
49  
50  
51  
52  
53  
54

55  
56 If the natural and vaccine immunity lasts only 365 and 182 days, respectively, the annual mass  
57 vaccination programmes are insufficient to sustain a constantly low prevalence of the susceptible,  
58 and the prevalence of the susceptible fluctuates up and down biannually (figure 3D-F). A single wave  
59  
60

1  
2 of mass vaccination is followed with multiple high peaks of daily COVID-19 deaths (figure 3D), and  
3 annual revaccination programmes result in corresponding changes in the prevalence of susceptible  
4 individuals and daily COVID-19 deaths (figure 3E, 3F). With four annual revaccination programmes,  
5 there are two flattened peaks of daily deaths from COVID-19 in March 2022 (n=151) and April 2024  
6 (n=168), respectively (figure 3E).  
7  
8  
9

### 10 **Projected COVID-19 deaths under various scenarios**

11  
12 The projected total numbers and daily peaks of COVID-19 deaths during 2020-2024, under all  
13 assumed scenarios, are available in supplementary table 1 and supplementary table 2. If there is no  
14 waning of immunity (i.e., immunity duration >4 years) and high vaccine efficacy, a single vaccination  
15 programme may prevent COVID-19 outbreaks during 2022-2024, after returning to normality  
16 (supplementary table 1). Otherwise, repeated vaccination programmes are required to prevent  
17 further large outbreaks with high peaks of daily deaths from COVID-19.  
18  
19  
20  
21  
22  
23

24 Table 1 shows results of annual vaccination programmes under selected scenarios. With annual  
25 revaccinations under optimistic scenarios, the cumulative number of COVID-19 deaths is estimated  
26 to be from 130,000 to 150,000 by the end of 2024. However, the total number of COVID-19 deaths  
27 may be up to 431,000 by the end of 2024, and the number of daily peak deaths may be as high as  
28 around 900 in 2022, 600 in 2023 and 1,400 in 2024, under scenarios with compromised long-term  
29 vaccine efficacy (62.5%), short duration of natural and vaccine immunity (365/182 days), and small  
30 reduction in reinfectivity (30%) (table 1).  
31  
32  
33  
34  
35

36 Results of revaccination programmes with different frequency (from two to six revaccinations during  
37 2021-2024) are shown in figure 4 and supplementary table 2. Revaccination programmes every two  
38 years can prevent outbreaks during 2022-2024 in a scenario with high vaccine efficacy (85%), large  
39 reduction in reinfectivity (60%), and long duration of immunity (730/365 days). Under assumed  
40 scenarios, more frequent revaccinations are associated with smaller total numbers and lower peaks  
41 of daily deaths from COVID-19 (supplementary table 2). As expected, frequent revaccinations are  
42 particularly important when the immunity response is short-lived (figure 4A, 4B, 4C, 4D). For  
43 example, under scenarios of lower long-term vaccine efficacy (62.5%), lower reduction in reinfectivity  
44 (30%), and shorter duration of immunity (365/182), the projected number of total COVID-19 deaths  
45 by the end of 2024 is reduced from around 430,000 by annual revaccination programmes to around  
46 310,000 by more frequent revaccinations every 8 months (supplementary table 2).  
47  
48  
49  
50  
51  
52  
53  
54

55 Results of scenarios with lower or higher vaccination coverage in younger adults are presented in  
56 supplementary table 3. As expected, lower coverage of vaccination programmes is associated with  
57 larger number of total COVID-19 deaths. For example, the projected cumulative number of COVID-19  
58 deaths by the end of 2024 is around 195,000, under a scenario (labelled as 'A2c4' in supplementary  
59  
60

1  
2 table 3) of annual revaccination, 85% vaccine efficacy, short duration of immunity (365/182 days),  
3 and 75-90% vaccination coverage. The number of COVID-19 deaths is reduced to around 183,000 in  
4 scenario (A2c4y) with 80-90% coverage, and increased to around 210,000 in scenario (A2c4x) with  
5 60-90% coverage (supplementary table 3).  
6  
7  
8  
9  
10

## 11 DISCUSSIONS

12  
13  
14 Mass immunisation using efficacious vaccines may enable society safely to return to normality.  
15 Repeated vaccination programmes are very likely to be required to prevent further COVID-19  
16 outbreaks, depending on vaccine efficacy, the durability and characteristics of different types of  
17 immune response to naturally acquired and vaccine-induced immune responses. Evidence on  
18 diseases caused by other common HCoVs indicated that the infection protection immunity may be  
19 short-lived, but the disease reduction and the reinfectivity reduction immunity are likely to be longer  
20 lasting.<sup>20</sup> We found that, if vaccine efficacy is high (85%) and reinfectivity is greatly reduced (e.g., by  
21 60%), repeated annual mass vaccination programmes prevent further COVID-19 large outbreaks,  
22 even if the vaccine induced sterilising immunity lasts only 182 days. Under optimistic scenarios, the  
23 cumulative number of COVID-19 deaths during 2020-2024 in England is estimated to be from  
24 130,000 to 150,000. If both the natural and vaccine immunity are short-lived (365 and 180 days,  
25 respectively), and reinfectivity is reduced only by 45% or 30%, further COVID-19 outbreaks cannot be  
26 prevented by annual vaccination programmes. The total number of COVID-19 deaths is estimated to  
27 be around 431,000 by the end of 2024, under a pessimistic scenario with low long-term vaccine  
28 efficacy (62.5%), short duration of vaccine immunity (365/182 days), and small reduction in  
29 reinfectivity (30%) (Table 1).  
30  
31  
32  
33  
34  
35  
36  
37  
38  
39  
40

41  
42 When natural and vaccine-induced immune response against SARS-CoV-2 infection is short-lived,  
43 more frequent revaccinations (e.g., every 8-10 months) can reduce deaths from COVID-19, compared  
44 with less frequent or annual revaccination programmes. However, frequent revaccination may not  
45 always be feasible, due to the availability of vaccine doses, resource restrictions, organisational  
46 complexity, and possibly decreased compliance by the public.  
47  
48  
49

50  
51 Compared with previous modelling studies,<sup>14-17</sup> our study has considered the durability of naturally  
52 acquired and vaccine induced immunity, over a five year period from 2020 to 2024, and compared a  
53 wider range of plausible scenarios. We explicitly investigated the impacts of different types of  
54 immune responses to SARS-CoV-2 infection and vaccines on the COVID-19 epidemic in a country.  
55 Findings from our study will improve the understanding of key immunological parameters relevant to  
56 future changes in SARS-CoV-2 transmission dynamics and vaccination strategies.  
57  
58  
59  
60

1  
2 Evidence from randomised controlled trials showed that vaccines against SARS-CoV-2 are efficacious  
3 in reducing symptomatic COVID-19 cases.<sup>5</sup> The reduction in symptomatic cases in the vaccine group  
4 may be attributable to infection protection or disease reduction. Available evidence showed that  
5 vaccines reduced the risk of SARS-CoV-2 virus infection in vaccinated individuals,<sup>38</sup> and household  
6 members of vaccinated healthcare workers has a lower risk of COVID-19 infection than those of  
7 unvaccinated.<sup>39</sup> In this study, we explored the impacts of different proportions of a vaccine's  
8 infection protection efficacy and disease reduction efficacy. Different combinations of the two  
9 efficacy components have impacts on the transmission dynamics, depending on the duration of  
10 immune response and reinfectivity after waning of sterilising immunity. Because of lack of data, we  
11 assumed that vaccine efficacy is equally attributable to the infection and disease reduction immunity.

12  
13  
14  
15  
16  
17  
18  
19 Vaccines that are efficacious against current SARS-CoV-2 virus may become less efficacious against  
20 new emerging variants.<sup>9</sup> Therefore, we modelled a range of overall long-term vaccine efficacy (62.5%  
21 vs. 85.0%). Although the vaccine efficacy might be reduced by new viral variants, it is also possible  
22 that repeated vaccinations may boost immune responses.<sup>40</sup> We assume that there will be no  
23 important safety issues for vaccines licensed to use. We focused on the impacts and interactions of  
24 vaccine efficacy, different types of immune response to SARS-CoV-2, and assumed no more  
25 restrictions by NPI measures after return to normality in England from 19 July 2021. However, the  
26 pessimistic scenarios in our analyses may not be allowed to happen in the real world, as NPI  
27 (including lockdown) measures may have to be introduced again if the vaccination programmes are  
28 insufficient to avoid the new outbreaks of COVID-19.

29  
30  
31  
32  
33  
34  
35  
36  
37 This is a deterministic simulation model, and uncertainty in estimated parameters may have not  
38 been fully accommodated. For simplicity, stochastic uncertainty, to quantify confidence intervals  
39 around the model's outputs, was not modelled. However, the model has been calibrated based on  
40 historically observed outcome data in England, and a large number of projection scenarios are  
41 explored to explicitly answer "what-if" questions. Although many uncertainties remain, including  
42 durability and types of naturally acquired and vaccine-induced immunity, our model can be updated  
43 to assess vaccination strategies, as new evidence emerges.

## 44 45 46 47 48 49 **Conclusions**

50  
51 Under optimistic scenarios, mass immunisation using efficacious vaccines may enable society safely  
52 to return to normality. However, under plausible scenarios with low vaccine efficacy and short  
53 durability of immunity, COVID-19 could continue to cause recurrent waves of severe morbidity and  
54 mortality despite frequent vaccinations, and necessitate stringent NPI restrictions. It is crucial to  
55 monitor the vaccination effects in the real world, and to better understand characteristics of  
56 naturally acquired and vaccine induced immunity against SARS-CoV-2.

## ACKNOWLEDGEMENT

**Acknowledgement:** We used UEA high performance computing cluster for this study, and received support from the Research and Specialist Computing Service, University of East Anglia.

**Contributors:** FS designed, developed the model, retrieved data for estimating parameters, conducted computational calculations, and prepared the draft manuscript. MOB provided methodological support, helped interpret results and critically revised the draft manuscript. FS accepts full responsibility for the work and/or the conduct of the study, had access to the data, and controlled the decision to publish.

**Competing interests:** No competing interests declared.

**Funding:** There are no specific funding received for this study

**Data sharing statement:** All data relevant to the study are included in the article or uploaded as online supplementary information.

**Patient consent for publication:** Not applicable.

**Ethics approval statement:** Not applicable. No human participants involved in this modelling study using data from published or openly accessible sources.

## FIGURE LEGENDS:

**Figure 1: Modelling COVID-19 epidemics in England - main compartments and transitions across status.** See supplementary files for details on definitions of transition parameters

**Figure 2. Projected numbers of COVID-19 deaths with different combinations of partial efficacy of infection and disease protection, immunity duration, and reduction in reinfectivity.**

The cumulative number of COVID-19 deaths by the end of 2024, after four repeated annual vaccinations of 90% individuals aged  $\geq 18$  during 2021-2024. The overall vaccine efficacy was 85%; "0-00/0-85" refers to all vaccine efficacy attributable to disease protection, "0-61/0-61" refers to equal infection and disease protection, "0-85/0-00" refers to all efficacy attributable to infection protection. Immunity duration: "365/182" refers to 365 days and 182 days, "and "730/365" refers to 730 and 365 days, respectively, natural and vaccine immunity. Figure 2A, 2B and 2C shows results under the assumption of 30%, 45% and 60% reduction in reinfectivity.

1  
2 **Figure 3. Projected peaks of daily COVID-19 deaths and the prevalence of susceptible individuals**  
3 **during 2020-2024 under scenarios with different immunity durability and vaccine strategies.** We  
4 assume 85% long-term vaccine efficacy; 75-90% coverage of individuals aged  $\geq 16$ ; 45% reduction in  
5 reinfectivity, longer (730/365 days, fig 3A-C) or shorter lasting (365/182 days, fig 3D-F)  
6 natural/vaccine immunity. Results were after a single vaccination (fig 3A and 3D), two annual  
7 vaccination programmes (fig 3B and 3E), and four annual vaccination programmes (Figure 3C and 3F).  
8  
9

10  
11  
12 **Figure 4. Results of revaccination programmes with different frequency.** Vaccine efficacy is 85.0% in  
13 fig 4A/C and 62.5% in fig 4B/D, respectively. Duration of immunity lasts 730/365 in fig 4A/B and  
14 365/182 days in fig 4C/D, respectively.  
15  
16

## 17 18 19 **ONLINE SUPPLEMENTARY MATERIALS**

20  
21 **Supplementary Files:** Model structure, data sources, model parameters, mathematical equations,  
22 and R code used.  
23

24 **Supplementary Table 1:** Projected total and daily peaks of COVID-19 deaths by the end of 2024 in  
25 England, under different scenarios of annual vaccination programmes  
26

27 **Supplementary Table 2:** Projected total and daily peaks of COVID-19 deaths by the end of 2024 in  
28 England by revaccination frequency.  
29

30 **Supplementary Table 3:** Projected total and daily peaks of COVID-19 deaths by the end of 2024 in  
31 England, under different scenarios of uptake rate of vaccination in younger adults  
32  
33  
34  
35  
36  
37  
38  
39  
40  
41  
42  
43  
44  
45  
46  
47  
48  
49  
50  
51  
52  
53  
54  
55  
56  
57  
58  
59  
60

## REFERENCES

1. The World Health Organization. WHO Coronavirus (COVID-19) Dashboard. 2021 [Available from: <https://covid19.who.int/> accessed August 10 2021.
2. Islam N, Sharp SJ, Chowell G, et al. Physical distancing interventions and incidence of coronavirus disease 2019: natural experiment in 149 countries. *Bmj* 2020;370:m2743. doi: 10.1136/bmj.m2743 [published Online First: 2020/07/17]
3. Krammer F. SARS-CoV-2 vaccines in development. *Nature* 2020;586(7830):516-27. doi: 10.1038/s41586-020-2798-3
4. Department of Health and Social Care. Optimising the covid-19 vaccination programme for maximum short-term impact. 2021 [Available from: <https://www.gov.uk/government/publications/prioritising-the-first-covid-19-vaccine-dose-jcvi-statement/optimising-the-covid-19-vaccination-programme-for-maximum-short-term-impact>.
5. Mallapaty S. Can COVID vaccines stop transmission? Scientists race to find answers. *Nature* 2021 doi: 10.1038/d41586-021-00450-z [published Online First: 2021/02/21]
6. Bingham K. The UK Government's Vaccine Taskforce: strategy for protecting the UK and the world. *Lancet* 2020 doi: 10.1016/s0140-6736(20)32175-9 [published Online First: 2020/10/31]
7. GOV.UK. The official UK government website for data and insights on coronavirus (COVID-19). 2021 [Available from: <https://coronavirus.data.gov.uk/> accessed August 10 2021.
8. Gov.uk. Coronavirus (COVID-19): Guidance and support. 2021 [Available from: <https://www.gov.uk/coronavirus> accessed 30 July 2021.
9. Mahase E. Covid-19: Where are we on vaccines and variants? *Bmj* 2021;372:n597. doi: 10.1136/bmj.n597 [published Online First: 2021/03/04]
10. Sanyaolu A, Okorie C, Marinkovic A, et al. The emerging SARS-CoV-2 variants of concern. *Therapeutic advances in infectious disease* 2021;8:20499361211024372. doi: 10.1177/20499361211024372 [published Online First: 2021/07/03]
11. Ferguson N, Laydon D, Nedjati-Gilani G, et al. Impact of non-pharmaceutical interventions (NPIs) to reduce COVID-19 mortality and healthcare demand.: Imperial College COVID-19 Response Team., 2020.
12. Davies NG, Kucharski AJ, Eggo RM, et al. Effects of non-pharmaceutical interventions on COVID-19 cases, deaths, and demand for hospital services in the UK: a modelling study. *The Lancet Public*

- 1  
2 health 2020;5(7):e375-e85. doi: 10.1016/s2468-2667(20)30133-x [published Online First:  
3  
4 2020/06/06]
- 5  
6 13. Giordano G, Blanchini F, Bruno R, et al. Modelling the COVID-19 epidemic and implementation of  
7  
8 population-wide interventions in Italy. *Nature medicine* 2020;26(6):855-60. doi: 10.1038/s41591-  
9  
10 020-0883-7 [published Online First: 2020/04/24]
- 11  
12 14. Cook TM, Roberts JV. Impact of vaccination by priority group on UK deaths, hospital admissions  
13  
14 and intensive care admissions from COVID-19. *Anaesthesia* 2021;76(5):608-16. doi:  
15  
16 10.1111/anae.15442 [published Online First: 2021/02/12]
- 17  
18 15. Miles DK, Heald AH, Stedman M. How fast should social restrictions be eased in England as  
19  
20 COVID-19 vaccinations are rolled out? *International journal of clinical practice* 2021:e14191. doi:  
21  
22 10.1111/ijcp.14191 [published Online First: 2021/04/01]
- 23  
24 16. Moore S, Hill EM, Tildesley MJ, et al. Vaccination and non-pharmaceutical interventions for  
25  
26 COVID-19: a mathematical modelling study. *Lancet Infect Dis* 2021 doi: 10.1016/s1473-  
27  
28 3099(21)00143-2 [published Online First: 2021/03/22]
- 29  
30 17. Sandmann FG, Davies NG, Vassall A, et al. The potential health and economic value of SARS-CoV-2  
31  
32 vaccination alongside physical distancing in the UK: a transmission model-based future scenario  
33  
34 analysis and economic evaluation. *Lancet Infect Dis* 2021 doi: 10.1016/s1473-3099(21)00079-7  
35  
36 [published Online First: 2021/03/22]
- 37  
38 18. Li J, Giabbanelli P. Returning to a Normal Life via COVID-19 Vaccines in the United States: A Large-  
39  
40 scale Agent-Based Simulation Study. *JMIR medical informatics* 2021;9(4):e27419. doi: 10.2196/27419  
41  
42 [published Online First: 2021/04/20]
- 43  
44 19. Hodgson SH, Mansatta K, Mallett G, et al. What defines an efficacious COVID-19 vaccine? A  
45  
46 review of the challenges assessing the clinical efficacy of vaccines against SARS-CoV-2. *Lancet Infect*  
47  
48 *Dis* 2020 doi: 10.1016/s1473-3099(20)30773-8 [published Online First: 2020/10/31]
- 49  
50 20. Lavine JS, Bjornstad ON, Antia R. Immunological characteristics govern the transition of COVID-19  
51  
52 to endemicity. *Science (New York, NY)* 2021;371(6530):741-45. doi: 10.1126/science.abe6522  
53  
54 [published Online First: 2021/01/14]
- 55  
56 21. R Core Team. R: A language and environment for statistical computing. R Foundation for  
57  
58 Statistical Computing, Vienna, Austria. URL <https://www.R-project.org/>. 2019
- 59  
60 22. GOV.UK. Coronavirus (COVID-19) in the UK 2021 [Available from:  
<https://coronavirus.data.gov.uk/> accessed 31 July 2021.



- 1  
2 23. Office for National Statistics. Dataset: 2018-based National population projections table of  
3 contents, 2018.  
4  
5  
6 24. Zhang J, Litvinova M, Wang W, et al. Evolving epidemiology and transmission dynamics of  
7 coronavirus disease 2019 outside Hubei province, China: a descriptive and modelling study. *Lancet*  
8 *Infect Dis* 2020 doi: 10.1016/s1473-3099(20)30230-9 [published Online First: 2020/04/06]  
9  
10  
11 25. Verity R, Okell LC, Dorigatti I, et al. Estimates of the severity of coronavirus disease 2019: a  
12 model-based analysis. *Lancet Infect Dis* 2020 doi: 10.1016/s1473-3099(20)30243-7 [published Online  
13 First: 2020/04/03]  
14  
15  
16 26. Rock K, Brand S, Moir J, et al. Dynamics of infectious diseases. *Rep Prog Phys* 2014;77(2):026602.  
17 doi: 10.1088/0034-4885/77/2/026602 [published Online First: 2014/01/22]  
18  
19  
20 27. Mahase E. Covid-19: What have we learnt about the new variant in the UK? *Bmj*  
21 2020;371:m4944. doi: 10.1136/bmj.m4944 [published Online First: 2020/12/29]  
22  
23  
24 28. Rubin D, Huang J, Fisher BT, et al. Association of Social Distancing, Population Density, and  
25 Temperature With the Instantaneous Reproduction Number of SARS-CoV-2 in Counties Across the  
26 United States. *JAMA network open* 2020;3(7):e2016099. doi: 10.1001/jamanetworkopen.2020.16099  
27 [published Online First: 2020/07/24]  
28  
29  
30 29. Mossong J, Hens N, Jit M, et al. Social contacts and mixing patterns relevant to the spread of  
31 infectious diseases. *PLoS Med* 2008;5(3):e74. doi: 10.1371/journal.pmed.0050074 [published Online  
32 First: 2008/03/28]  
33  
34  
35 30. Mahase E. Covid-19: UK approves Pfizer and BioNTech vaccine with rollout due to start next  
36 week. 2020;371:m4714. doi: 10.1136/bmj.m4714 %J BMJ  
37  
38  
39 31. Department of Health & Social Care JCVI statement, August 2021: COVID-19 vaccination of  
40 children and young people aged 12 to 17 years.: Department of Health & Social Care 2021 [Available  
41 from: <https://www.gov.uk/government/organisations/department-of-health-and-social-care>.  
42  
43  
44  
45  
46  
47 32. PHE. COVID-19 vaccine surveillance report Week 28: Public Health England 2021.  
48  
49  
50 33. Le Bert N, Tan AT, Kunasegaran K, et al. SARS-CoV-2-specific T cell immunity in cases of COVID-19  
51 and SARS, and uninfected controls. *Nature* 2020;584(7821):457-62. doi: 10.1038/s41586-020-2550-z  
52 [published Online First: 2020/07/16]  
53  
54  
55 34. Levine-Tiefenbrun M, Yelin I, Katz R, et al. Decreased SARS-CoV-2 viral load following vaccination.  
56 2021:2021.02.06.21251283. doi: 10.1101/2021.02.06.21251283 %J medRxiv  
57  
58  
59  
60

- 1  
2 35. Emary KRW, Golubchik T, Aley PK, et al. Efficacy of ChAdOx1 nCoV-19 (AZD1222) Vaccine Against  
3 SARS-CoV-2 VOC 202012/01 (B.1.1.7). SSRN [Preprint]. 2021. DOI: 10.2139/ssrn.3779160. Available  
4 at: [https://papers.ssrn.com/sol3/papers.cfm?abstract\\_id=3779160](https://papers.ssrn.com/sol3/papers.cfm?abstract_id=3779160) 2021  
5  
6  
7 36. Mallapaty S. COVID vaccines slash viral spread - but Delta is an unknown. Nature 2021 doi:  
8 10.1038/d41586-021-02054-z [published Online First: 2021/07/30]  
9  
10  
11 37. Government Office for Science and Scientific Advisory Group for Emergencies. Guidance: The R  
12 number and growth rate in the UK. From Government Office for Science and Scientific Advisory  
13 Group for Emergencies. 2020 [updated Last updated 2 October 2020. Available from:  
14 <https://www.gov.uk/guidance/the-r-number-in-the-uk#contents> accessed 08/10/2020.  
15  
16  
17 38. Hall VJ, Foulkes S, Charlett A, et al. SARS-CoV-2 infection rates of antibody-positive compared  
18 with antibody-negative health-care workers in England: a large, multicentre, prospective cohort  
19 study (SIREN). Lancet 2021;397(10283):1459-69. doi: 10.1016/s0140-6736(21)00675-9 [published  
20 Online First: 2021/04/13]  
21  
22  
23 39. Shah AS, Gribben C, Bishop J, et al. Effect of vaccination on transmission of COVID-19: an  
24 observational study in healthcare workers and their households. 2021:2021.03.11.21253275. doi:  
25 10.1101/2021.03.11.21253275 %J medRxiv  
26  
27  
28 40. Callaway E. COVID vaccine boosters: the most important questions. Nature 2021;596(7871):178-  
29 80. doi: 10.1038/d41586-021-02158-6 [published Online First: 2021/08/07]  
30  
31  
32  
33  
34  
35  
36  
37  
38  
39  
40  
41  
42  
43  
44  
45  
46  
47  
48  
49  
50  
51  
52  
53  
54  
55  
56  
57  
58  
59  
60

**Table 1. Projected total and daily peak COVID-19 deaths after annual vaccination programmes by 2024 in England**

| Scenario | Long-term vaccine efficacy | Reduction in reinfectivity | Immunity duration (day):<br>Natural /vaccine | Total COVID-19 deaths (2020-2024) | Daily peaks of COVID-19 deaths |      |      |
|----------|----------------------------|----------------------------|----------------------------------------------|-----------------------------------|--------------------------------|------|------|
|          |                            |                            |                                              |                                   | 2022                           | 2023 | 2024 |
| A1b4     | 85.0%                      | 60%                        | 730/365                                      | 127,550                           | 28                             | 0    | 0    |
| A2b4     | 85.0%                      | 45%                        | 730/365                                      | 134,421                           | 42                             | 0    | 36   |
| A3b4     | 85.0%                      | 30%                        | 730/365                                      | 152,926                           | 64                             | 4    | 131  |
| A1c4     | 85.0%                      | 60%                        | 365/182                                      | 148,093                           | 89                             | 2    | 7    |
| A2c4     | 85.0%                      | 45%                        | 365/182                                      | 194,661                           | 151                            | 55   | 168  |
| A3c4     | 85.0%                      | 30%                        | 365/182                                      | 229,664                           | 208                            | 145  | 96   |
| B1b4     | 62.5%                      | 60%                        | 730/365                                      | 143,233                           | 104                            | 0    | 0    |
| B2b4     | 62.5%                      | 45%                        | 730/365                                      | 179,002                           | 209                            | 0    | 224  |
| B3b4     | 62.5%                      | 30%                        | 730/365                                      | 233,075                           | 366                            | 3    | 384  |
| B1c4     | 62.5%                      | 60%                        | 365/182                                      | 198,684                           | 351                            | 2    | 47   |
| B2c4     | 62.5%                      | 45%                        | 365/182                                      | 350,016                           | 615                            | 537  | 886  |
| B3c4     | 62.5%                      | 30%                        | 365/182                                      | 430,219                           | 888                            | 616  | 1362 |

Notes to Table 1: Scenario labels are corresponding to those used in supplementary table 1. We assume annual vaccination covers 75-90% of individuals aged  $\geq 16$  years; the short-term vaccine efficacy is 62.5% after the first dose and 85% after the second dose, and the overall vaccine efficacy is equally attributable to the infection and disease protection. "Long-term vaccine efficacy" refers to vaccine efficacy in fully vaccinated after January 2022.

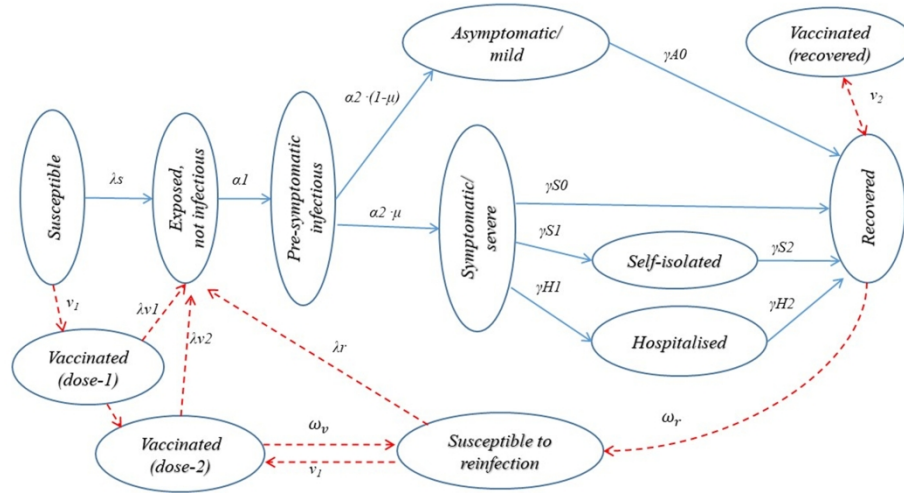

Figure 1: Modelling COVID-19 epidemics in England - main compartments and transitions across status. See supplementary files for details on definitions of transition parameters

338x190mm (300 x 300 DPI)

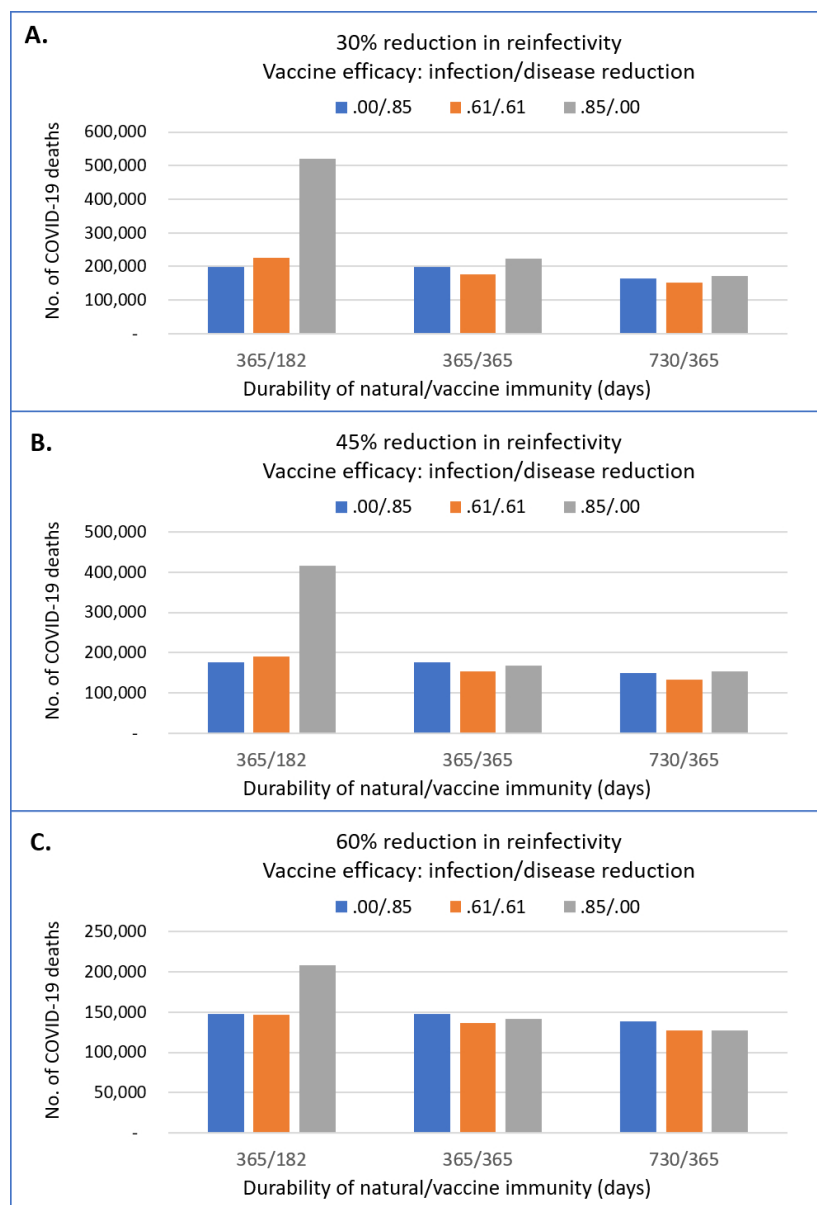

Figure 2. Projected numbers of COVID-19 deaths with different combinations of partial efficacy of infection and disease protection, immunity duration, and reduction in re infectivity. The cumulative number of COVID-19 deaths by the end of 2024, after four repeated annual vaccinations of 90% individuals aged  $\geq 18$  during 2021-2024. The overall vaccine efficacy was 85%; "0.00/0.85" refers to all vaccine efficacy attributable to disease protection, "0.61/0.61" refers to equal infection and disease protection, "0.85/0.00" refers to all efficacy attributable to infection protection. Immunity duration: "365/182" refers to 365 days and 182 days, "and "730/365" refers to 730 and 365 days, respectively, natural and vaccine immunity. Figure 2A, 2B and 2C shows results under the assumption of 30%, 45% and 60% reduction in re infectivity.

168x246mm (150 x 150 DPI)

1  
2  
3  
4  
5  
6  
7  
8  
9  
10  
11  
12  
13  
14  
15  
16  
17  
18  
19  
20  
21  
22  
23  
24  
25  
26  
27  
28  
29  
30  
31  
32  
33  
34  
35  
36  
37  
38  
39  
40  
41  
42  
43  
44  
45  
46  
47  
48  
49  
50  
51  
52  
53  
54  
55  
56  
57  
58  
59  
60

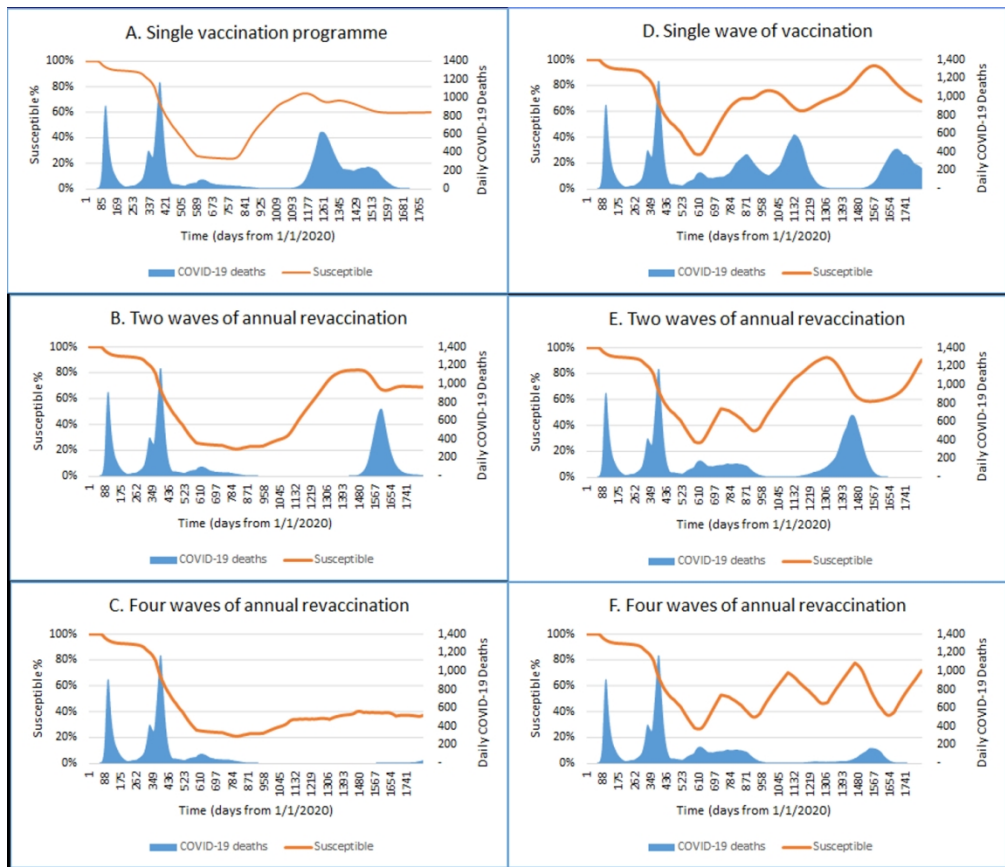

Figure 3. Projected peaks of daily COVID-19 deaths and the prevalence of susceptible individuals during 2020-2024 under scenarios with different immunity durability and vaccine strategies. We assume 85% long-term vaccine efficacy; 75-90% coverage of individuals aged  $\geq 16$ ; 45% reduction in reinfectivity, longer (730/365 days, fig 3A-C) or shorter lasting (365/182 days, fig 3D-F) natural/vaccine immunity. Results were after a single vaccination (fig 3A and 3D), two annual vaccination programmes (fig 3B and 3E), and four annual vaccination programmes (Figure 3C and 3F).

252x217mm (150 x 150 DPI)

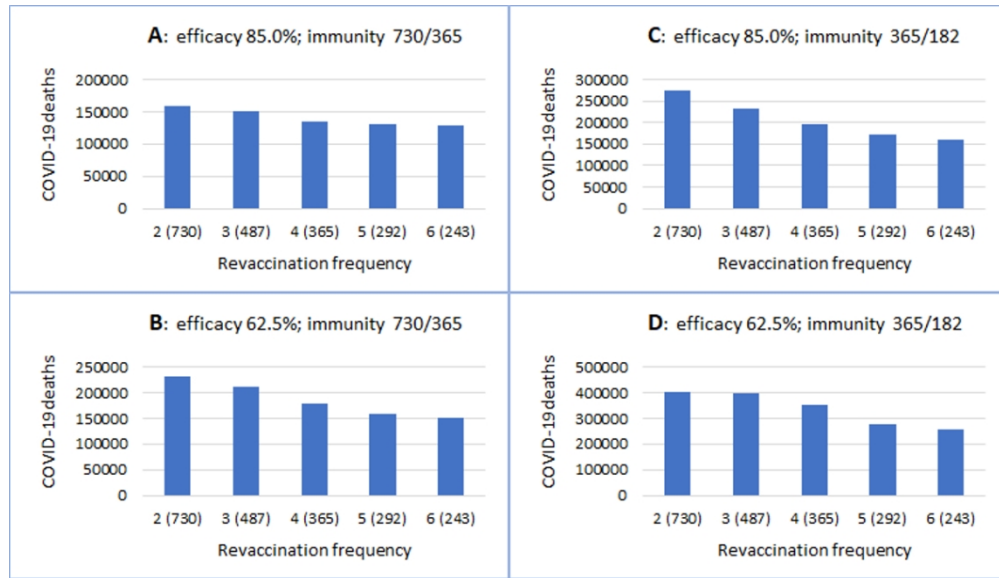

Figure 4. Results of revaccination programmes with different frequency. Vaccine efficacy is 85.0% in fig 4A/C and 62.5% in fig 4B/D, respectively. Duration of immunity lasts 730/365 in fig 4A/B and 365/182 days in fig 4C/D, respectively.

204x117mm (150 x 150 DPI)

## Supplementary table 1:

### Projected total and daily peaks of COVID-19 deaths by the end of 2024 in England under different scenarios of annual vaccination programmes

#### Assumptions and notes:

- 75-90% vaccination coverage of individuals aged  $\geq 16$  years old.
- Initial overall vaccine efficacy: 62.5% after dose-1 and 85% after dose-2.
- The overall vaccine efficacy is equally attributable to the infection and disease protection.

| Scenario | Vaccination waves (interval days) | Long-term vaccine efficacy | Reduction in reinfectivity | Immunity duration (day): Natural /vaccine | Total COVID-19 deaths (2020-2024) | Daily peaks of COVID-19 deaths |      |      |
|----------|-----------------------------------|----------------------------|----------------------------|-------------------------------------------|-----------------------------------|--------------------------------|------|------|
|          |                                   |                            |                            |                                           |                                   | 2022                           | 2023 | 2024 |
| A1a1     | 1                                 | 85.0%                      | 60%                        | No waning                                 | 128,039                           | 28                             | 0    | 0    |
| A1a2     | 2 (365)                           | 85.0%                      | 60%                        | No waning                                 | 127,464                           | 28                             | 0    | 0    |
| A1a3     | 3 (365)                           | 85.0%                      | 60%                        | No waning                                 | 127,464                           | 28                             | 0    | 0    |
| A1a4     | 4 (365)                           | 85.0%                      | 60%                        | No waning                                 | 127,464                           | 28                             | 0    | 0    |
| A1b1     | 1                                 | 85.0%                      | 60%                        | 730/365                                   | 242,691                           | 28                             | 592  | 582  |
| A1b2     | 2 (365)                           | 85.0%                      | 60%                        | 730/365                                   | 154,956                           | 28                             | 0    | 592  |
| A1b3     | 3 (365)                           | 85.0%                      | 60%                        | 730/365                                   | 127,550                           | 28                             | 0    | 0    |
| A1b4     | 4 (365)                           | 85.0%                      | 60%                        | 730/365                                   | 127,550                           | 28                             | 0    | 0    |
| A1c1     | 1                                 | 85.0%                      | 60%                        | 365/182                                   | 239,044                           | 281                            | 452  | 56   |
| A1c2     | 2 (365)                           | 85.0%                      | 60%                        | 365/182                                   | 196,149                           | 89                             | 78   | 392  |
| A1c3     | 3 (365)                           | 85.0%                      | 60%                        | 365/182                                   | 155,320                           | 89                             | 2    | 109  |
| A1c4     | 4 (365)                           | 85.0%                      | 60%                        | 365/182                                   | 148,093                           | 89                             | 2    | 7    |
| B1a1     | 1                                 | 62.5%                      | 60%                        | No waning                                 | 144,586                           | 105                            | 0    | 0    |
| B1a2     | 2 (365)                           | 62.5%                      | 60%                        | No waning                                 | 142,720                           | 104                            | 0    | 0    |
| B1a3     | 3 (365)                           | 62.5%                      | 60%                        | No waning                                 | 142,720                           | 104                            | 0    | 0    |
| B1a4     | 4 (365)                           | 62.5%                      | 60%                        | No waning                                 | 142,720                           | 104                            | 0    | 0    |
| B1b1     | 1                                 | 62.5%                      | 60%                        | 730/365                                   | 320,789                           | 105                            | 952  | 950  |
| B1b2     | 2 (365)                           | 62.5%                      | 60%                        | 730/365                                   | 230,198                           | 104                            | 0    | 1066 |
| B1b3     | 3 (365)                           | 62.5%                      | 60%                        | 730/365                                   | 143,670                           | 104                            | 0    | 16   |
| B1b4     | 4 (365)                           | 62.5%                      | 60%                        | 730/365                                   | 143,233                           | 104                            | 0    | 0    |
| B1c1     | 1                                 | 62.5%                      | 60%                        | 365/182                                   | 353,663                           | 528                            | 536  | 407  |
| B1c2     | 2 (365)                           | 62.5%                      | 60%                        | 365/182                                   | 292,109                           | 351                            | 103  | 915  |
| B1c3     | 3 (365)                           | 62.5%                      | 60%                        | 365/182                                   | 225,230                           | 351                            | 2    | 412  |
| B1c4     | 4 (365)                           | 62.5%                      | 60%                        | 365/182                                   | 198,684                           | 351                            | 2    | 47   |
| A2a1     | 1                                 | 85.0%                      | 45%                        | No waning                                 | 132,749                           | 42                             | 0    | 0    |



|    |      |         |       |     |           |         |     |      |      |
|----|------|---------|-------|-----|-----------|---------|-----|------|------|
| 1  |      |         |       |     |           |         |     |      |      |
| 2  |      |         |       |     |           |         |     |      |      |
| 3  | A2a2 | 2 (365) | 85.0% | 45% | No waning | 131,963 | 42  | 0    | 0    |
| 4  | A2a3 | 3 (365) | 85.0% | 45% | No waning | 131,963 | 42  | 0    | 0    |
| 5  | A2a4 | 4 (365) | 85.0% | 45% | No waning | 131,963 | 42  | 0    | 0    |
| 6  |      |         |       |     |           |         |     |      |      |
| 7  |      |         |       |     |           |         |     |      |      |
| 8  | A2b1 | 1       | 85.0% | 45% | 730/365   | 265,799 | 42  | 627  | 243  |
| 9  | A2b2 | 2 (365) | 85.0% | 45% | 730/365   | 206,600 | 42  | 9    | 731  |
| 10 | A2b3 | 3 (365) | 85.0% | 45% | 730/365   | 159,912 | 42  | 0    | 582  |
| 11 | A2b4 | 4 (365) | 85.0% | 45% | 730/365   | 134,421 | 42  | 0    | 36   |
| 12 |      |         |       |     |           |         |     |      |      |
| 13 |      |         |       |     |           |         |     |      |      |
| 14 | A2c1 | 1       | 85.0% | 45% | 365/182   | 373,907 | 479 | 588  | 435  |
| 15 | A2c2 | 2 (365) | 85.0% | 45% | 365/182   | 266,690 | 151 | 675  | 628  |
| 16 | A2c3 | 3 (365) | 85.0% | 45% | 365/182   | 222,944 | 151 | 55   | 363  |
| 17 | A2c4 | 4 (365) | 85.0% | 45% | 365/182   | 194,661 | 151 | 55   | 168  |
| 18 |      |         |       |     |           |         |     |      |      |
| 19 | B2a1 | 1       | 62.5% | 45% | No waning | 163,679 | 209 | 0    | 0    |
| 20 | B2a2 | 2 (365) | 62.5% | 45% | No waning | 161,055 | 209 | 0    | 0    |
| 21 | B2a3 | 3 (365) | 62.5% | 45% | No waning | 161,055 | 209 | 0    | 0    |
| 22 | B2a4 | 4 (365) | 62.5% | 45% | No waning | 161,055 | 209 | 0    | 0    |
| 23 |      |         |       |     |           |         |     |      |      |
| 24 |      |         |       |     |           |         |     |      |      |
| 25 | B2b1 | 1       | 62.5% | 45% | 730/365   | 383,433 | 209 | 916  | 801  |
| 26 | B2b2 | 2 (365) | 62.5% | 45% | 730/365   | 304,138 | 209 | 13   | 1301 |
| 27 | B2b3 | 3 (365) | 62.5% | 45% | 730/365   | 236,662 | 209 | 0    | 952  |
| 28 | B2b4 | 4 (365) | 62.5% | 45% | 730/365   | 179,002 | 209 | 0    | 224  |
| 29 |      |         |       |     |           |         |     |      |      |
| 30 |      |         |       |     |           |         |     |      |      |
| 31 | B2c1 | 1       | 62.5% | 45% | 365/182   | 611,929 | 867 | 1542 | 2437 |
| 32 | B2c2 | 2 (365) | 62.5% | 45% | 365/182   | 443,176 | 615 | 1860 | 1096 |
| 33 | B2c3 | 3 (365) | 62.5% | 45% | 365/182   | 376,242 | 615 | 537  | 1092 |
| 34 | B2c4 | 4 (365) | 62.5% | 45% | 365/182   | ,016    | 615 | 537  | 886  |

|    |      |         |       |     |           |         |     |      |      |
|----|------|---------|-------|-----|-----------|---------|-----|------|------|
| 35 |      |         |       |     |           |         |     |      |      |
| 36 |      |         |       |     |           |         |     |      |      |
| 37 | A3a1 | 1       | 85.0% | 30% | No waning | 138,595 | 64  | 0    | 0    |
| 38 | A3a2 | 2 (365) | 85.0% | 30% | No waning | 137,672 | 64  | 0    | 0    |
| 39 | A3a3 | 3 (365) | 85.0% | 30% | No waning | 137,672 | 64  | 0    | 0    |
| 40 | A3a4 | 4 (365) | 85.0% | 30% | No waning | 137,672 | 64  | 0    | 0    |
| 41 |      |         |       |     |           |         |     |      |      |
| 42 |      |         |       |     |           |         |     |      |      |
| 43 | A3b1 | 1       | 85.0% | 30% | 730/365   | 301,437 | 64  | 1235 | 218  |
| 44 | A3b2 | 2 (365) | 85.0% | 30% | 730/365   | 259,144 | 64  | 297  | 1645 |
| 45 | A3b3 | 3 (365) | 85.0% | 30% | 730/365   | 187,753 | 64  | 4    | 324  |
| 46 | A3b4 | 4 (365) | 85.0% | 30% | 730/365   | 152,926 | 64  | 4    | 131  |
| 47 |      |         |       |     |           |         |     |      |      |
| 48 |      |         |       |     |           |         |     |      |      |
| 49 | A3c1 | 1       | 85.0% | 30% | 365/182   | 498,043 | 743 | 764  | 1933 |
| 50 | A3c2 | 2 (365) | 85.0% | 30% | 365/182   | 321,779 | 208 | 537  | 599  |
| 51 | A3c3 | 3 (365) | 85.0% | 30% | 365/182   | 317,223 | 208 | 145  | 618  |
| 52 | A3c4 | 4 (365) | 85.0% | 30% | 365/182   | 229,664 | 208 | 145  | 96   |
| 53 |      |         |       |     |           |         |     |      |      |
| 54 | B3a1 | 1       | 62.5% | 30% | No waning | 188,227 | 366 | 0    | 0    |
| 55 | B3a2 | 2 (365) | 62.5% | 30% | No waning | 185,384 | 366 | 0    | 0    |
| 56 | B3a3 | 3 (365) | 62.5% | 30% | No waning | 185,384 | 366 | 0    | 0    |
| 57 | B3a4 | 4 (365) | 62.5% | 30% | No waning | 185,384 | 366 | 0    | 0    |
| 58 |      |         |       |     |           |         |     |      |      |
| 59 |      |         |       |     |           |         |     |      |      |
| 60 | B3b1 | 1       | 62.5% | 30% | 730/365   | 448,904 | 366 | 1093 | 649  |

|      |         |       |     |         |         |      |      |      |
|------|---------|-------|-----|---------|---------|------|------|------|
| B3b2 | 2 (365) | 62.5% | 30% | 730/365 | 392,651 | 366  | 98   | 2877 |
| B3b3 | 3 (365) | 62.5% | 30% | 730/365 | 291,181 | 366  | 3    | 720  |
| B3b4 | 4 (365) | 62.5% | 30% | 730/365 | 233,075 | 366  | 3    | 384  |
| B3c1 | 1       | 62.5% | 30% | 365/182 | 822,318 | 1095 | 2571 | 3202 |
| B3c2 | 2 (365) | 62.5% | 30% | 365/182 | 682,299 | 888  | 1714 | 5055 |
| B3c3 | 3 (365) | 62.5% | 30% | 365/182 | 627,017 | 888  | 616  | 3165 |
| B3c4 | 4 (365) | 62.5% | 30% | 365/182 | 430,219 | 888  | 616  | 1362 |

For peer review only

**Supplementary table 2:**

**Projected total and daily peaks of COVID-19 deaths by the end of 2024 in England by revaccination frequency**

**Assumptions and notes:**

- Age-based 75-90% vaccination coverage of individuals aged 16+.
- Initial overall vaccine efficacy: 62.5% after dose-1 and 85% after dose-2.
- The overall vaccine efficacy is equally attributable to the infection and disease protection.

| Scenario | Vaccination waves (interval days) | Long-term vaccine efficacy | Reduction in reinfectivity | Immunity duration (day): Natural /vaccine | Total COVID-19 deaths (2020-2024) | Daily peaks of COVID-19 deaths |      |      |
|----------|-----------------------------------|----------------------------|----------------------------|-------------------------------------------|-----------------------------------|--------------------------------|------|------|
|          |                                   |                            |                            |                                           |                                   | 2022                           | 2023 | 2024 |

|      |         |       |     |         |         |     |     |     |
|------|---------|-------|-----|---------|---------|-----|-----|-----|
| FAa2 | 2 (730) | 85.0% | 60% | 730/365 | 140,596 | 28  | 42  | 22  |
| FAa3 | 3 (487) | 85.0% | 60% | 730/365 | 129,991 | 28  | 0   | 14  |
| FAa4 | 4 (365) | 85.0% | 60% | 730/365 | 127,550 | 28  | 0   | 0   |
| FAa5 | 5 (292) | 85.0% | 60% | 730/365 | 126,529 | 22  | 0   | 0   |
| FAa6 | 6 (243) | 85.0% | 60% | 730/365 | 125,523 | 18  | 0   | 0   |
| FAb2 | 2 (730) | 62.5% | 60% | 730/365 | 179,155 | 105 | 89  | 79  |
| FAb3 | 3 (487) | 62.5% | 60% | 730/365 | 154,959 | 105 | 1   | 56  |
| FAb4 | 4 (365) | 62.5% | 60% | 730/365 | 143,233 | 104 | 0   | 0   |
| FAb5 | 5 (292) | 62.5% | 60% | 730/365 | 139,718 | 86  | 0   | 0   |
| FAb6 | 6 (243) | 62.5% | 60% | 730/365 | 136,348 | 71  | 0   | 0   |
| FAc2 | 2 (730) | 85.0% | 60% | 365/182 | 217,980 | 281 | 385 | 0   |
| FAc3 | 3 (487) | 85.0% | 60% | 365/182 | 169,204 | 196 | 21  | 14  |
| FAc4 | 4 (365) | 85.0% | 60% | 365/182 | 148,093 | 89  | 2   | 7   |
| FAc5 | 5 (292) | 85.0% | 60% | 365/182 | 138,246 | 48  | 1   | 5   |
| FAc6 | 6 (243) | 85.0% | 60% | 365/182 | 133,413 | 32  | 0   | 1   |
| FAd2 | 2 (730) | 62.5% | 60% | 365/182 | 276,596 | 528 | 334 | 8   |
| FAd3 | 3 (487) | 62.5% | 60% | 365/182 | 253,667 | 528 | 46  | 212 |
| FAd4 | 4 (365) | 62.5% | 60% | 365/182 | 198,684 | 351 | 2   | 47  |
| FAd5 | 5 (292) | 62.5% | 60% | 365/182 | 173,428 | 235 | 0   | 26  |
| FAd6 | 6 (243) | 62.5% | 60% | 365/182 | 162,428 | 156 | 0   | 30  |

|      |         |       |     |         |         |    |     |     |
|------|---------|-------|-----|---------|---------|----|-----|-----|
| FBa2 | 2 (730) | 85.0% | 45% | 730/365 | 158,901 | 42 | 207 | 2   |
| FBa3 | 3 (487) | 85.0% | 45% | 730/365 | 150,943 | 42 | 23  | 185 |
| FBa4 | 4 (365) | 85.0% | 45% | 730/365 | 134,421 | 42 | 0   | 36  |
| FBa5 | 5 (292) | 85.0% | 45% | 730/365 | 130,614 | 34 | 0   | 0   |
| FBa6 | 6 (243) | 85.0% | 45% | 730/365 | 129,085 | 24 | 0   | 0   |

1  
2  
3  
4  
5  
6  
7  
8  
9  
10  
11  
12  
13  
14  
15  
16  
17  
18  
19  
20  
21  
22  
23  
24  
25  
26  
27  
28  
29  
30  
31  
32  
33  
34  
35  
36  
37  
38  
39  
40  
41  
42  
43  
44  
45  
46  
47  
48  
49  
50  
51  
52  
53  
54  
55  
56  
57  
58  
59  
60

|      |         |       |     |         |         |     |      |     |
|------|---------|-------|-----|---------|---------|-----|------|-----|
| FBb2 | 2 (730) | 62.5% | 45% | 730/365 | 230,119 | 209 | 181  | 175 |
| FBb3 | 3 (487) | 62.5% | 45% | 730/365 | 210,446 | 209 | 32   | 426 |
| FBb4 | 4 (365) | 62.5% | 45% | 730/365 | 179,002 | 209 | 0    | 224 |
| FBb5 | 5 (292) | 62.5% | 45% | 730/365 | 158,367 | 172 | 0    | 53  |
| FBb6 | 6 (243) | 62.5% | 45% | 730/365 | 150,833 | 148 | 0    | 10  |
| FBc2 | 2 (730) | 85.0% | 45% | 365/182 | 275,028 | 479 | 565  | 14  |
| FBc3 | 3 (487) | 85.0% | 45% | 365/182 | 231,322 | 377 | 87   | 231 |
| FBc4 | 4 (365) | 85.0% | 45% | 365/182 | 194,661 | 151 | 55   | 168 |
| FBc5 | 5 (292) | 85.0% | 45% | 365/182 | 170,881 | 80  | 49   | 102 |
| FBc6 | 6 (243) | 85.0% | 45% | 365/182 | 158,864 | 50  | 24   | 80  |
| FBd2 | 2 (730) | 62.5% | 45% | 365/182 | 400,280 | 867 | 1052 | 73  |
| FBd3 | 3 (487) | 62.5% | 45% | 365/182 | 397,725 | 867 | 507  | 522 |
| FBd4 | 4 (365) | 62.5% | 45% | 365/182 | 350,016 | 615 | 537  | 886 |
| FBd5 | 5 (292) | 62.5% | 45% | 365/182 | 278,879 | 390 | 314  | 540 |
| FBd6 | 6 (243) | 62.5% | 45% | 365/182 | 255,266 | 282 | 238  | 470 |

|      |         |       |     |         |         |      |      |      |
|------|---------|-------|-----|---------|---------|------|------|------|
| FCa2 | 2 (730) | 85.0% | 30% | 730/365 | 187,710 | 64   | 461  | 0    |
| FCa3 | 3 (487) | 85.0% | 30% | 730/365 | 181,301 | 64   | 286  | 455  |
| FCa4 | 4 (365) | 85.0% | 30% | 730/365 | 152,926 | 64   | 4    | 131  |
| FCa5 | 5 (292) | 85.0% | 30% | 730/365 | 144,263 | 48   | 0    | 58   |
| FCa6 | 6 (243) | 85.0% | 30% | 730/365 | 135,771 | 38   | 0    | 50   |
| FCb2 | 2 (730) | 62.5% | 30% | 730/365 | 289,900 | 366  | 251  | 349  |
| FCb3 | 3 (487) | 62.5% | 30% | 730/365 | 283,517 | 366  | 215  | 1173 |
| FCb4 | 4 (365) | 62.5% | 30% | 730/365 | 233,075 | 366  | 3    | 384  |
| FCb5 | 5 (292) | 62.5% | 30% | 730/365 | 215,885 | 318  | 0    | 228  |
| FCb6 | 6 (243) | 62.5% | 30% | 730/365 | 196,552 | 275  | 0    | 368  |
| FCc2 | 2 (730) | 85.0% | 30% | 365/182 | 460,413 | 743  | 764  | 1973 |
| FCc3 | 3 (487) | 85.0% | 30% | 365/182 | 306,941 | 564  | 488  | 550  |
| FCc4 | 4 (365) | 85.0% | 30% | 365/182 | 229,664 | 208  | 145  | 96   |
| FCc5 | 5 (292) | 85.0% | 30% | 365/182 | 207,684 | 106  | 189  | 130  |
| FCc6 | 6 (243) | 85.0% | 30% | 365/182 | 181,143 | 65   | 159  | 88   |
| FCd2 | 2 (730) | 62.5% | 30% | 365/182 | 674,854 | 1095 | 2328 | 5638 |
| FCd3 | 3 (487) | 62.5% | 30% | 365/182 | 548,250 | 1019 | 737  | 613  |
| FCd4 | 4 (365) | 62.5% | 30% | 365/182 | 430,219 | 888  | 616  | 1362 |
| FCd5 | 5 (292) | 62.5% | 30% | 365/182 | 336,705 | 543  | 527  | 255  |
| FCd6 | 6 (243) | 62.5% | 30% | 365/182 | 306,706 | 428  | 506  | 659  |

**Supplementary table 3:**

**Projected total and daily peaks of COVID-19 deaths by the end of 2024 in England under different scenarios of uptake rate of vaccination in younger adults**

**Assumptions and notes:**

- Initial overall vaccine efficacy: 62.5% after dose-1 and 85% after dose-2.
- The overall vaccine efficacy is equally attributable to the infection and disease protection.
- Reinfectivity is reduced by 45%.

| Scenario | Uptake rate | Vaccination waves (interval days) | Long-term vaccine efficacy | Immunity duration (day): Natural /vaccine | Total COVID-19 deaths (2020-2024) | Daily peaks of COVID-19 deaths |      |      |
|----------|-------------|-----------------------------------|----------------------------|-------------------------------------------|-----------------------------------|--------------------------------|------|------|
|          |             |                                   |                            |                                           |                                   | 2022                           | 2023 | 2024 |

**Higher coverage in younger adults: age 16-29: 80%; age 30-39: 85%; age 40-49%: 90; age 50+: 90%**

|       |           |         |       |         |        |     |      |      |
|-------|-----------|---------|-------|---------|--------|-----|------|------|
| A2b1y | 0.80-0.90 | 1       | 85.0% | 730/365 | 269147 | 33  | 544  | 328  |
| A2b2y | 0.80-0.90 | 2 (365) | 85.0% | 730/365 | 203065 | 33  | 5    | 646  |
| A2b3y | 0.80-0.90 | 3 (365) | 85.0% | 730/365 | 149709 | 33  | 0    | 516  |
| A2b4y | 0.80-0.90 | 4 (365) | 85.0% | 730/365 | 131794 | 33  | 0    | 23   |
| A2c1y | 0.80-0.90 | 1       | 85.0% | 365/182 | 374300 | 652 | 681  | 597  |
| A2c2y | 0.80-0.90 | 2 (365) | 85.0% | 365/182 | 253530 | 114 | 454  | 438  |
| A2c3y | 0.80-0.90 | 3 (365) | 85.0% | 365/182 | 214420 | 114 | 41   | 215  |
| A2c4y | 0.80-0.90 | 4 (365) | 85.0% | 365/182 | 182710 | 114 | 41   | 82   |
| B2b1y | 0.80-0.90 | 1       | 62.5% | 730/365 | 380068 | 171 | 852  | 787  |
| B2b2y | 0.80-0.90 | 2 (365) | 62.5% | 730/365 | 294212 | 171 | 17   | 1339 |
| B2b3y | 0.80-0.90 | 3 (365) | 62.5% | 730/365 | 230951 | 171 | 0    | 813  |
| B2b4y | 0.80-0.90 | 4 (365) | 62.5% | 730/365 | 175249 | 171 | 0    | 187  |
| B2c1y | 0.80-0.90 | 1       | 62.5% | 365/182 | 618489 | 764 | 1506 | 1842 |
| B2c2y | 0.80-0.90 | 2 (365) | 62.5% | 365/182 | 425932 | 515 | 1578 | 875  |
| B2c3y | 0.80-0.90 | 3 (365) | 62.5% | 365/182 | 356424 | 515 | 465  | 877  |
| B2c4y | 0.80-0.90 | 4 (365) | 62.5% | 365/182 | 331865 | 515 | 465  | 695  |

**Moderate coverage in younger adults: age 16-29: 75%; age 30-39: 80%; age 40-49: 85%; age 50+: 90%**

|      |           |         |       |         |        |     |     |     |
|------|-----------|---------|-------|---------|--------|-----|-----|-----|
| A2b1 | 0.75-0.90 | 1       | 85.0% | 730/365 | 265799 | 42  | 627 | 243 |
| A2b2 | 0.75-0.90 | 2 (365) | 85.0% | 730/365 | 206600 | 42  | 9   | 731 |
| A2b3 | 0.75-0.90 | 3 (365) | 85.0% | 730/365 | 159912 | 42  | 0   | 582 |
| A2b4 | 0.75-0.90 | 4 (365) | 85.0% | 730/365 | 134421 | 42  | 0   | 36  |
| A2c1 | 0.75-0.90 | 1       | 85.0% | 365/182 | 373907 | 479 | 588 | 435 |
| A2c2 | 0.75-0.90 | 2 (365) | 85.0% | 365/182 | 266690 | 151 | 675 | 628 |
| A2c3 | 0.75-0.90 | 3 (365) | 85.0% | 365/182 | 222944 | 151 | 55  | 363 |
| A2c4 | 0.75-0.90 | 4 (365) | 85.0% | 365/182 | 194661 | 151 | 55  | 168 |

|      |           |         |       |         |        |     |      |      |
|------|-----------|---------|-------|---------|--------|-----|------|------|
| B2b1 | 0.75-0.90 | 1       | 62.5% | 730/365 | 383433 | 209 | 916  | 801  |
| B2b2 | 0.75-0.90 | 2 (365) | 62.5% | 730/365 | 304138 | 209 | 13   | 1301 |
| B2b3 | 0.75-0.90 | 3 (365) | 62.5% | 730/365 | 236662 | 209 | 0    | 952  |
| B2b4 | 0.75-0.90 | 4 (365) | 62.5% | 730/365 | 179002 | 209 | 0    | 224  |
| B2c1 | 0.75-0.90 | 1       | 62.5% | 365/182 | 611929 | 867 | 1542 | 2437 |
| B2c2 | 0.75-0.90 | 2 (365) | 62.5% | 365/182 | 443176 | 615 | 1860 | 1096 |
| B2c3 | 0.75-0.90 | 3 (365) | 62.5% | 365/182 | 376242 | 615 | 537  | 1092 |
| B2c4 | 0.75-0.90 | 4 (365) | 62.5% | 365/182 | 350016 | 615 | 537  | 886  |

**Lower vaccination coverage in younger adults: age 16-29: 60%; age 30-39: 70%; age 40-49: 80%; age 50+: 90%**

|       |           |         |       |         |        |     |      |      |
|-------|-----------|---------|-------|---------|--------|-----|------|------|
| A2b1x | 0.60-0.90 | 1       | 85.0% | 730/365 | 266219 | 67  | 638  | 209  |
| A2b2x | 0.60-0.90 | 2 (365) | 85.0% | 730/365 | 214159 | 67  | 14   | 761  |
| A2b3x | 0.60-0.90 | 3 (365) | 85.0% | 730/365 | 171971 | 67  | 0    | 562  |
| A2b4x | 0.60-0.90 | 4 (365) | 85.0% | 730/365 | 140179 | 67  | 0    | 46   |
| A2c1x | 0.60-0.90 | 1       | 85.0% | 365/182 | 379362 | 477 | 550  | 353  |
| A2c2x | 0.60-0.90 | 2 (365) | 85.0% | 365/182 | 290730 | 243 | 1064 | 1066 |
| A2c3x | 0.60-0.90 | 3 (365) | 85.0% | 365/182 | 243384 | 243 | 46   | 548  |
| A2c4x | 0.60-0.90 | 4 (365) | 85.0% | 365/182 | 209857 | 243 | 46   | 255  |
| B2b1x | 0.60-0.90 | 1       | 62.5% | 730/365 | 398443 | 306 | 1376 | 1052 |
| B2b2x | 0.60-0.90 | 2 (365) | 62.5% | 730/365 | 333844 | 306 | 3    | 1150 |
| B2b3x | 0.60-0.90 | 3 (365) | 62.5% | 730/365 | 237005 | 306 | 0    | 1250 |
| B2b4x | 0.60-0.90 | 4 (365) | 62.5% | 730/365 | 185126 | 306 | 0    | 240  |
| B2c1x | 0.60-0.90 | 1       | 62.5% | 365/182 | 520700 | 977 | 1747 | 1732 |
| B2c2x | 0.60-0.90 | 2 (365) | 62.5% | 365/182 | 470214 | 814 | 2238 | 1526 |
| B2c3x | 0.60-0.90 | 3 (365) | 62.5% | 365/182 | 406564 | 814 | 563  | 1408 |
| B2c4x | 0.60-0.90 | 4 (365) | 62.5% | 365/182 | 377531 | 814 | 563  | 1140 |

1  
2  
3  
4  
5  
6  
7  
8  
9  
10  
11  
12  
13  
14  
15  
16  
17  
18  
19  
20  
21  
22  
23  
24  
25  
26  
27  
28  
29  
30  
31  
32  
33  
34  
35  
36  
37  
38  
39  
40  
41  
42  
43  
44  
45  
46  
47  
48  
49  
50  
51  
52  
53  
54  
55  
56  
57  
58  
59  
60

## Supplementary files for:

### Vaccination against COVID-19 and society's return to normality in England: a modelling investigation of different types of naturally acquired and vaccine induced immunity

1. Model structure and status
  2. Data sources and model verification
  3. Projection scenarios
  4. Mathematical equations
  5. R-code used and related input data files
  6. References
- For peer review only

## 1. Model structure and status

This is a discrete-time population dynamic simulation model. Population in England are partitioned into discrete categories by sex (male or female), age (0-4, 5-9, then by 10 year age bands, and 80+), and Covid-19 infection categories. The main infection categories include: susceptible (SU), exposed (EX), infected (IN), and recovered (RE) (appendix figure 1). The infected individuals are further categorised as asymptomatic, symptomatic, self-isolated, and hospitalised.

**Appendix figure 1: Model structure and transmission across states**

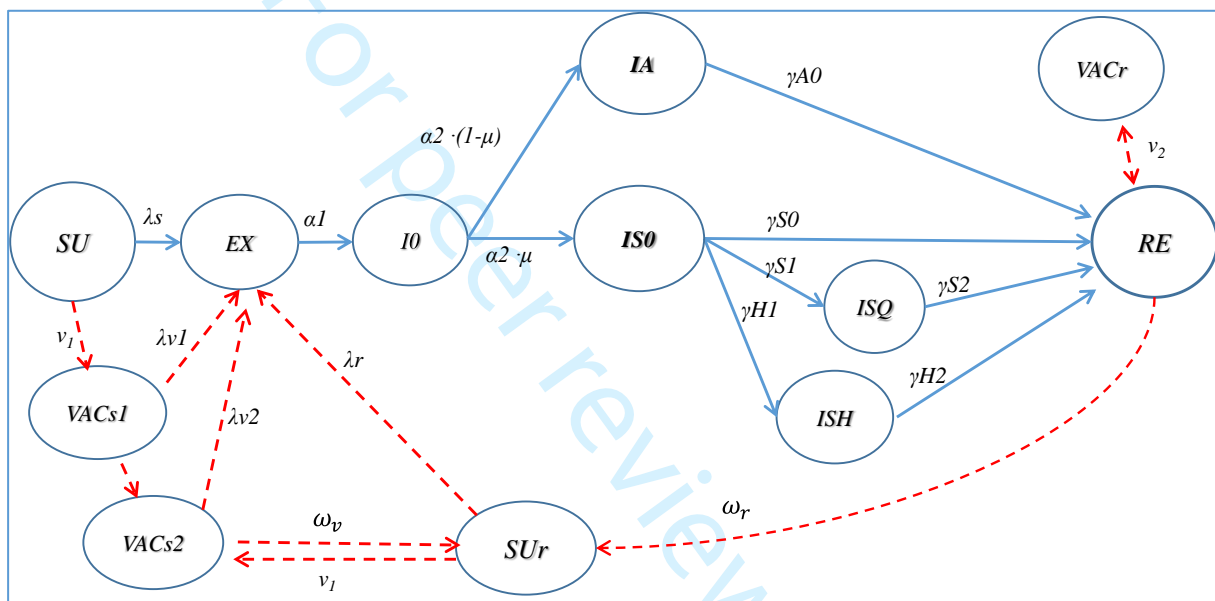

### Definitions of compartmental states in appendix figure 1

- SU: susceptible individuals
- SUr: Individuals susceptible to reinfection after immunity waning
- EX: exposed individuals, not infectious
- IO: infectious, before symptom onset
- IA: infectious individuals with no or very mild symptoms
- ISO: symptomatic patients who are not quarantined
- ISQ: symptomatic patients self-isolated
- ISH: symptomatic patients who are hospitalised
- RE: recovered from covid-19 infection
- VACs1: vaccinated (dose-1) susceptible individuals
- VACs2: vaccinated (dose-1) susceptible individuals
- VACr: vaccinated individuals who recovered from infection

### Transition parameters in appendix figure 1:

- $\lambda_s$ : Force of infection ( $\lambda$ ) measures the risk (probability) of infection transmission.



- $\lambda_{v1}$ : Force of infection ( $\lambda$ ) after the first dose vaccine.
- $\lambda_{v2}$ : Force of infection ( $\lambda$ ) after the second dose vaccine.
- $\lambda_r$ : Force of infection ( $\lambda$ ) after waning of vaccine-induced or naturally acquired immunity.
- $\alpha_1$ : rate of progressing from being exposed to being infectious.
- $\alpha_2$ : rate of progressing from being asymptomatic infectious to symptomatic.
- $\mu$ : proportion of infected individuals who will be symptomatic; age-specific
- $\gamma_{A0}$ : rate of recovering for asymptomatic individuals
- $\gamma_{S0}$ : rate of recovering for symptomatic, not isolated/hospitalised patients
- $\gamma_{S1}$ : rate of being isolated in symptomatic patients
- $\gamma_{S2}$ : rate of recovering in isolated patients
- $\gamma_{H1}$ : rate of being hospitalised for symptomatic patients
- $\gamma_{H2}$ : rate of recovering in hospitalised patients
- $\nu_1$ : rate of vaccinating susceptible individuals
- $\nu_2$ : rate of vaccinating recovered individuals
- $w_v$ : rate of immunity waning in vaccinated individuals
- $w_r$ : rate of immunity waning in recovered individuals

All individuals in England are assumed to be susceptible to SARS-CoV-2 infection at the beginning of 2020. Susceptible individuals may be infected by contacting infectious individuals, and the infection status is changed from “susceptible” (SU) to “exposed” (EX). The exposed individuals are not infectious during the early incubation period, but start to be infectious before the onset of symptoms. Individuals infected with SARS-CoV-2 virus may have no or very mild symptoms (IA), and palpable symptoms (symptomatic or clinical infections). Asymptomatic individuals can spread SARS-CoV-2 virus before recovery, although the transmission risk may be lower than symptomatic patients. Symptomatic patients are further classified into three categories: symptomatic patients who are neither isolated nor hospitalised (IS0), those who self-isolate at home (ISQ), and those who are hospitalised (including those being admitted to intensive care units) (ISH). Symptomatic patients are infectious and can transmit the virus to susceptible people before being isolated, hospitalised or recovered. We assume that hospitalised patients (ISH) are well isolated and no longer able to spread the virus to the susceptible population, although infectious patients who are self-isolated at home (ISQ) may transmit virus to household contacts.

Individuals may recover from previous infection of SARS-CoV-2 (RE), and the susceptible and recovered individuals may be vaccinated with vaccines against SARS-CoV-2 virus (VAC1 and VAC2). Individuals recovered or effectively vaccinated may develop immune responses against infection with SARS-CoV-2. However, if the protective immunity is not long lasting, individuals who have recovered or vaccinated may become susceptible again after the waning of the immunity (SUR).

The immune response against COVID-19, either by naturally acquired from past SARS-CoV-2 infection or vaccine-induced, may be long lasting or short-lived. Immune response may reduce susceptibility of individuals to infection (infection protection, or sterilising, immunity), reduce disease severity after being infected (disease reduction immunity), and reduce infectivity of those who are reinfected after recovery or being vaccinated (reinfected reduction immunity).<sup>1</sup> According to existing evidence on immunological characteristics for other human coronaviruses, immunity against reinfection (sterilising immunity) may be waning in several months, while disease and reinfected reduction responses are likely long lasting.<sup>1</sup> According to these basic concepts specified by Lavine et al,<sup>1</sup> we incorporate the three types of immune responses into the model, to explicitly evaluate their impacts on future transmission dynamics (appendix figure 2).

**Appendix figure 2: Illustration of immune responses by natural infection or vaccination**

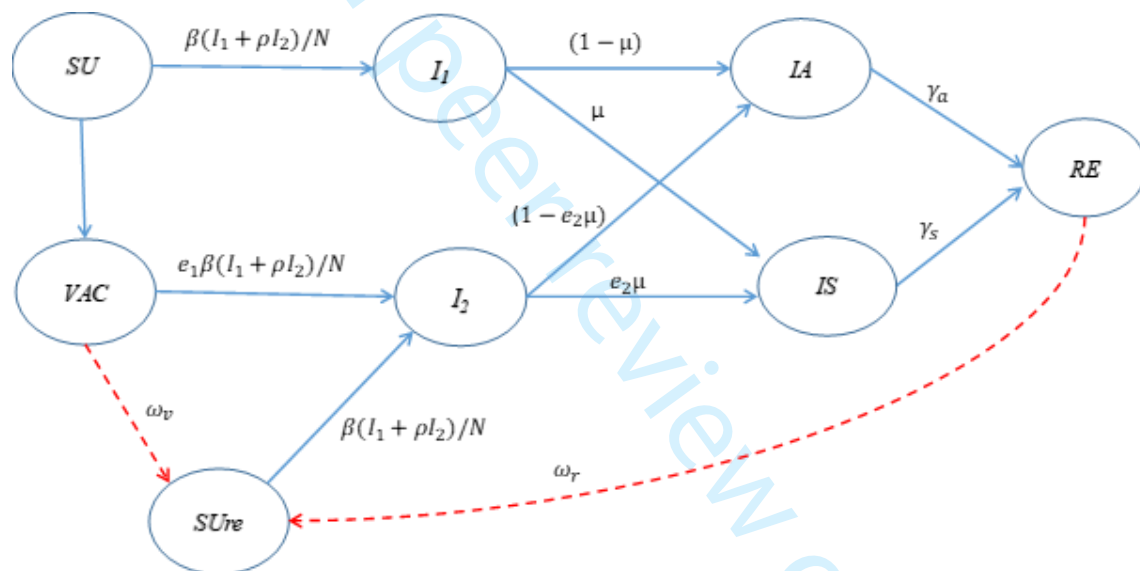

**Notes to appendix figure 2:**

- Appendix figure2 is a simplified version of appendix figure 1, not showing isolation and hospitalisation for symptomatic patients.
- $N$ : The number of the population
- $\beta$ : The transmission rate, i.e., the average number of individuals infected daily by an infectious person. It is a function of the number of daily close contacts per person ( $c$ ), and the transmission risk per contact between a susceptible and an infectious individual ( $\eta$ ): i.e.,  $\beta=c \cdot \eta$ .
- $I_1$ : Infectious individuals with primary infection
- $I_2$ : Infectious individuals with secondary infection (infected after being vaccinated or recovered)
- $\rho$ : Relative infectivity of the secondary infection ( $I_2$ ) compared with the primary infection ( $I_1$ ). For example, if  $\rho=0.6$ , the infectivity of  $I_2$  is 40% lower than the infectivity of  $I_1$
- $\mu$ : proportion of infected individuals who will be symptomatic; age-specific
- $e_1$ : Relative efficacy of vaccine for sterilising immunity, reducing risk of virus transmission

- $e_2$ : Relative efficacy of vaccine for pathology reduction, reducing the proportion of symptomatic cases after being infected
- $IA$ : Asymptomatic individuals
- $IS$ : Symptomatic patients
- $\gamma_a$ : Average rate of recovering of asymptomatic individuals
- $\gamma_s$ : Average rate of recovering of symptomatic individuals
- $\omega_v$ : rate of immunity waning in vaccinated individuals
- $\omega_r$ : rate of immunity waning in recovered individuals

### Overall and partial vaccine efficacy

Results of randomised controlled trials shown that vaccines may be >90% efficacious (e.g., Pfizer mRNA vaccine) in reducing severe symptomatic diseases, compared with the placebo group.<sup>2</sup> In appendix figure 2,  $e_1$  and  $e_2$  are parameters of vaccine's efficacy in blocking virus transmission and reducing symptomatic cases in the infected, respectively. The reduction in symptomatic cases in the vaccine group may be due to the prevention of infection in susceptible individuals (related to  $e_1$ ), or a lower proportion of infected individuals being symptomatic in the vaccine group (related to  $e_2$ ), or due to a combination of both (note:  $e_1$  and  $e_2 \geq 1$  - overall VE, and  $\leq 1$ ). Let  $\lambda$  is the transmission risk and  $\mu$  is the proportion of symptomatic cases in the infected without vaccination. After being vaccinated, the transmission risk is reduced to  $\lambda \cdot e_1$ , and the proportion of symptomatic cases reduced to  $\mu \cdot e_2$ . For a vaccine with 90% efficacy in reducing the number of symptomatic cases (compared with the control group), it should be true that  $e_1 \cdot e_2 = (1 - 0.90)$ , or  $e_1 = 0.10 / e_2$ . There are many different possible combinations of  $e_1$  and  $e_2$  for a given overall efficacy in reducing symptomatic cases. For example,  $e_1 = e_2 = \text{SQRT}(0.30) = 0.548$  corresponds to a 70% efficacy of vaccine with equal sterilising immunity and pathology reduction. If  $e_1 = 1$  (i.e., zero efficacy in sterilising immunity), all vaccine efficacy will be attributable to the pathology reduction, with  $e_2 = 0.30$ , for a vaccine with 70% efficacy. The partial efficacy is calculated using:  $E_i = 1 - (1 - E_o) / E_d$ , where  $E_i$  is the partial efficacy for infection protection,  $E_d$  is the partial efficacy for disease reduction, and  $E_o$  is the overall vaccine efficacy. The equal partial efficacy is calculated by:  $E_i = E_d = 1 - \sqrt{(1 - E_o)}$ . For vaccines with 90%, 70% and 50% overall efficacy, the equal partial efficacy for the infection protection and disease reduction is 69.4%, 45.2%, and 29.3%, respectively.

## 2. Parameterisation, data sources, and simulation scenarios

### 2.1 Transition parameters and distribution of infectious period

In appendix figure 1, force of infection ( $\lambda$ ) measures the risk of infection,<sup>3</sup> which is a function of transmission rate ( $\eta$ ) and the prevalence of existing infectious individuals ( $I$ ) among the population ( $N$ ):  $\lambda = \eta \cdot I/N$ . The transmission rate  $\eta$  in the discrete-time model can be defined as the average number of new infected individuals generated daily by an infected person. That is,  $\eta = Rt/T$ , in which  $Rt$  is effective reproduction number and  $T$  is the average infectious period for infected individuals. We calculated  $\eta$  as a function of the number of daily contacts per person ( $c$ ), and the risk of transmission per contact between a susceptible and an infected individual ( $\beta$ ):  $\eta = c \cdot \beta$ .<sup>4</sup>

The transition rate between model's compartments in infectious models is often assumed to be constant, calculated by  $1/x$ , in which "x" is the average period that subjects remain before the transition to the model's next compartments.<sup>3</sup> Therefore, the infectious period in standard SIR or SEIR models is usually assumed to be exponentially distributed, with some limitations of the use of exponentially distributed infectious period.<sup>5 6</sup> In this study, we assumed that the transition probability between model's compartments are based on gamma distributed periods that individuals remain in a compartment.<sup>7</sup> The transition probability ( $y$ ) at  $t$  is:  $y_t = (cg_t - cg_{t-1}) / (1 - cg_t)$ , where  $cg_t$  is the gamma cumulative probability by the end of  $t$ . Given mean and shape ( $k$ ) parameters, the gamma distribution based transition probability is used as a deterministic value to estimate the number of individuals moving between two status in this study.

### 2.2 Parameterisation and data sources

We estimated initial parameters based on relevant literature and data from the UK government websites (appendix table 1). Key parameters were calibrated according to the reported numbers of covid-19 deaths, hospitalised patients, and the prevalence of infected individuals in England from January 2020 to June 2021.<sup>8</sup>

Appendix table 1: Summary of key model parameters and data sources

| Parameter                                                                     | Value                  |                       |                       | Source and notes                                                                          |
|-------------------------------------------------------------------------------|------------------------|-----------------------|-----------------------|-------------------------------------------------------------------------------------------|
| <b>Proportion of asymptomatic cases in infected individuals (%)</b>           |                        |                       |                       |                                                                                           |
| Age: 0-9                                                                      | 0.71                   |                       |                       | Davis et al. <sup>9</sup>                                                                 |
| 10-19                                                                         | 0.79                   |                       |                       |                                                                                           |
| 20-29                                                                         | 0.73                   |                       |                       |                                                                                           |
| 30-39                                                                         | 0.67                   |                       |                       |                                                                                           |
| 40-49                                                                         | 0.60                   |                       |                       |                                                                                           |
| 50-59                                                                         | 0.51                   |                       |                       |                                                                                           |
| 60-69                                                                         | 0.37                   |                       |                       |                                                                                           |
| 70+                                                                           | 0.31                   |                       |                       |                                                                                           |
| <b>Proportion of self-isolated symptomatic cases who are not hospitalised</b> |                        |                       |                       |                                                                                           |
| <b>Age:</b>                                                                   | <b>0-49</b>            | <b>50-69</b>          | <b>70+</b>            | Assumed by authors, and calibrated according to reported COVID-19 deaths.                 |
| Before 13/03/2021                                                             | 0.10                   | 0.10                  | 0.10                  |                                                                                           |
| 13/03-23/03/2020                                                              | 0.40                   | 0.60                  | 0.80                  |                                                                                           |
| After 24/03/2020                                                              | 0.80-0.90              | 0.80-0.95             | 0.90-0.95             |                                                                                           |
| <b>Estimated values of gamma distributed parameters (mean, shape k)</b>       |                        |                       |                       |                                                                                           |
|                                                                               | <b>Before 12/03/20</b> | <b>13/03-23/03/20</b> | <b>After 23/03/20</b> | Zhang et al. <sup>10</sup><br>Davies et al. <sup>7</sup><br>Ferguson et al. <sup>11</sup> |
| Duration from exposed to being preclinical infectious (day)                   | 4.0 (4)                | 4.0 (4)               | 4.0 (4)               |                                                                                           |
| Duration of preclinical infectious (day)                                      | 1.5 (2)                | 1.5 (2)               | 1.5 (2)               |                                                                                           |
| Infectious period before recovery (day)                                       | 5.0 (5)                | 5.0 (5)               | 5.0 (5)               |                                                                                           |
| Infectious period before being isolated (day)                                 | 4.0 (4)                | 3.0 (3)               | 2.0 (2)               |                                                                                           |
| Infectious period during isolation at home (day)                              | 2.0 (2)                | 3.0 (3)               | 4.0 (4)               |                                                                                           |
| Infectious period before being hospitalised (day)                             | 4.0 (4)                | 3.0 (3)               | 2.0 (2)               |                                                                                           |
| Duration of hospitalisation (day)                                             | 10.0 (10)              | 10.0 (10)             | 10.0 (10)             |                                                                                           |
| Delay from being infected to deaths from Covid-19 (day)                       | 23.0 (23)              | 23.0 (23)             | 23.0 (23)             | Verity et al. <sup>12</sup>                                                               |
| <b>Case fatality rates (%)</b>                                                |                        |                       |                       |                                                                                           |
| Age: 0-9                                                                      | 0.0026                 |                       |                       | Verity et al. <sup>12</sup> ;<br>Chinese CDC <sup>13</sup>                                |
| 10-19                                                                         | 0.0148                 |                       |                       |                                                                                           |
| 20-29                                                                         | 0.0600                 |                       |                       |                                                                                           |
| 30-39                                                                         | 0.1460                 |                       |                       |                                                                                           |
| 40-49                                                                         | 0.2950                 |                       |                       |                                                                                           |
| 50-59                                                                         | 1.2500                 |                       |                       |                                                                                           |
| 60-69                                                                         | 3.9900                 |                       |                       |                                                                                           |
| 70-79                                                                         | 8.6100                 |                       |                       |                                                                                           |
| 80+                                                                           | 13.400                 |                       |                       |                                                                                           |
| <b>Age specific rates of hospitalisation among infected individuals</b>       |                        |                       |                       |                                                                                           |
| 0-9                                                                           | 0.010%                 |                       |                       | Verity et al. <sup>12</sup>                                                               |
| 10-19                                                                         | 0.041%                 |                       |                       |                                                                                           |
| 20-29                                                                         | 1.04%                  |                       |                       |                                                                                           |
| 30-39                                                                         | 3.43%                  |                       |                       |                                                                                           |
| 40-49                                                                         | 4.25%                  |                       |                       |                                                                                           |
| 50-59                                                                         | 8.16%                  |                       |                       |                                                                                           |
| 60-69                                                                         | 11.8%                  |                       |                       |                                                                                           |

|                                                                                                                                                                     |                                                                                                                                                                                                                   |                                                                                                                                           |              |            |                                                                                                                                                                                                                           |
|---------------------------------------------------------------------------------------------------------------------------------------------------------------------|-------------------------------------------------------------------------------------------------------------------------------------------------------------------------------------------------------------------|-------------------------------------------------------------------------------------------------------------------------------------------|--------------|------------|---------------------------------------------------------------------------------------------------------------------------------------------------------------------------------------------------------------------------|
| 70-79                                                                                                                                                               | 16.6%                                                                                                                                                                                                             |                                                                                                                                           |              |            |                                                                                                                                                                                                                           |
| 80+                                                                                                                                                                 | 18.4%                                                                                                                                                                                                             |                                                                                                                                           |              |            |                                                                                                                                                                                                                           |
| <b>SARS-CoV-2 transmission related parameters</b>                                                                                                                   |                                                                                                                                                                                                                   |                                                                                                                                           |              |            |                                                                                                                                                                                                                           |
| Initial importing of infected cases                                                                                                                                 | The first exposed case was imported to England on 15 January, and the daily number of infectious cases imported was increased by one until 9 February 2020, with a total number of 351 cases imported in 25 days. | Assumed by authors and calibrated with the observed number of covid-19 deaths in England.                                                 |              |            |                                                                                                                                                                                                                           |
| the risk of transmission per contact between a susceptible and an infected individual ( $\beta$ )                                                                   | Before any NPI measures: 0.094<br>NPI measures (03/2020): 0.066<br>Alpha variant (10/2020-): 0.077<br>Delta variant (06/2021-): 0.081                                                                             | Calibrated according to changes in reported R values, <sup>14</sup> NPI policies <sup>15</sup> and reported covid-19 deaths. <sup>8</sup> |              |            |                                                                                                                                                                                                                           |
| Seasonal changes in transmission risk (09/2021-12/2024)                                                                                                             | 10% higher in September, October, March and April, and 20% higher in November, December, January and February, compared with the risk in summer months from May to August.                                        | Literature (e.g., <sup>16</sup> ) and authors' assumptions.                                                                               |              |            |                                                                                                                                                                                                                           |
| Transmission risk by asymptomatic individuals                                                                                                                       | 21% of the transmission risk by symptomatic cases                                                                                                                                                                 | Li et al. <sup>17</sup>                                                                                                                   |              |            |                                                                                                                                                                                                                           |
| <b>Assumed impacts of NPIs on general contacts in England. Notes:</b>                                                                                               |                                                                                                                                                                                                                   |                                                                                                                                           |              |            |                                                                                                                                                                                                                           |
| Notes: Values are scaling fractions to reduce the normal contacts. For example, a fraction of 0.80 means the contacts are reduced by 20%.                           |                                                                                                                                                                                                                   |                                                                                                                                           |              |            |                                                                                                                                                                                                                           |
| <b>Age group</b>                                                                                                                                                    | <b>0-19</b>                                                                                                                                                                                                       | <b>20-59</b>                                                                                                                              | <b>60-69</b> | <b>70+</b> | The sex-and-age-specific numbers of daily contacts per person from Mossong et al. <sup>18</sup> Calibrated according to covid-19 control restrictions <sup>15</sup> and reported covid-19 deaths in England. <sup>8</sup> |
| Before 13/3/2020                                                                                                                                                    | 1.00                                                                                                                                                                                                              | 1.00                                                                                                                                      | 1.00         | 1.00       |                                                                                                                                                                                                                           |
| 13/03/2020-                                                                                                                                                         | 0.90                                                                                                                                                                                                              | 0.80                                                                                                                                      | 0.70         | 0.60       |                                                                                                                                                                                                                           |
| 17/03/2020-                                                                                                                                                         | 0.80                                                                                                                                                                                                              | 0.70                                                                                                                                      | 0.60         | 0.50       |                                                                                                                                                                                                                           |
| 24/03/2020-                                                                                                                                                         | 0.40                                                                                                                                                                                                              | 0.30                                                                                                                                      | 0.20         | 0.15       |                                                                                                                                                                                                                           |
| 05/07/2020-                                                                                                                                                         | 0.60                                                                                                                                                                                                              | 0.55                                                                                                                                      | 0.40         | 0.20       |                                                                                                                                                                                                                           |
| 01/09/2020-                                                                                                                                                         | 0.80                                                                                                                                                                                                              | 0.60                                                                                                                                      | 0.50         | 0.30       |                                                                                                                                                                                                                           |
| 05/11/2020-                                                                                                                                                         | 0.60                                                                                                                                                                                                              | 0.30                                                                                                                                      | 0.20         | 0.15       |                                                                                                                                                                                                                           |
| 02/12/2020-                                                                                                                                                         | 0.70                                                                                                                                                                                                              | 0.60                                                                                                                                      | 0.50         | 0.30       |                                                                                                                                                                                                                           |
| 05/01/2021-                                                                                                                                                         | 0.40                                                                                                                                                                                                              | 0.30                                                                                                                                      | 0.20         | 0.15       |                                                                                                                                                                                                                           |
| 08/03/2021-                                                                                                                                                         | 0.80                                                                                                                                                                                                              | 0.60                                                                                                                                      | 0.50         | 0.30       |                                                                                                                                                                                                                           |
| 01/05/2021                                                                                                                                                          | 0.90                                                                                                                                                                                                              | 0.80                                                                                                                                      | 0.70         | 0.60       |                                                                                                                                                                                                                           |
| 19/07/2021-                                                                                                                                                         | 1.00                                                                                                                                                                                                              | 1.00                                                                                                                                      | 1.00         | 1.00       |                                                                                                                                                                                                                           |
| <b>Vaccine relative efficacy in reducing symptomatic cases</b>                                                                                                      |                                                                                                                                                                                                                   |                                                                                                                                           |              |            |                                                                                                                                                                                                                           |
| Notes: We assume that vaccine efficacy for reducing symptomatic cases is equally attributable to infection reduction and disease reduction in the main projections. |                                                                                                                                                                                                                   |                                                                                                                                           |              |            |                                                                                                                                                                                                                           |
| 14 days after the first dose                                                                                                                                        | 62.5%                                                                                                                                                                                                             |                                                                                                                                           |              |            | Public Health England <sup>19</sup>                                                                                                                                                                                       |
| After the second dose                                                                                                                                               | 85.0%                                                                                                                                                                                                             |                                                                                                                                           |              |            |                                                                                                                                                                                                                           |
| Long-term efficacy after revaccination                                                                                                                              | 62.5%, 85.0%                                                                                                                                                                                                      |                                                                                                                                           |              |            | Public Health England, <sup>19</sup> and authors' assumption.                                                                                                                                                             |
| Durability of naturally acquired sterilising immunity                                                                                                               | 365 or 730 days                                                                                                                                                                                                   |                                                                                                                                           |              |            | Lavine et al., <sup>1</sup> Le Bert et al., <sup>20</sup> Widge et al. <sup>21</sup>                                                                                                                                      |
| Durability of vaccine-induced sterilising immunity                                                                                                                  | 182 or 365 days                                                                                                                                                                                                   |                                                                                                                                           |              |            |                                                                                                                                                                                                                           |
| Durability of immunity against severe disease after re-infection                                                                                                    | >4 years                                                                                                                                                                                                          |                                                                                                                                           |              |            |                                                                                                                                                                                                                           |
| Reduction in reinfectivity (transmission risk) in vaccinated or recovered individuals                                                                               | 30%, 45% or 60%                                                                                                                                                                                                   |                                                                                                                                           |              |            | Mallapaty et al., <sup>22</sup> PHE. <sup>19</sup>                                                                                                                                                                        |

| <b>Vaccination programme related parameters</b>                                                                                                                                                      |                                                                                                                                                         |                                                                     |
|------------------------------------------------------------------------------------------------------------------------------------------------------------------------------------------------------|---------------------------------------------------------------------------------------------------------------------------------------------------------|---------------------------------------------------------------------|
| Notes: The mass vaccination is modelled as an age-based phase approach, starting from people aged $\geq 70$ , followed by individuals aged 60-69, 50-59, 30-49, and then those aged 16-29 years old. |                                                                                                                                                         |                                                                     |
| Maximum number of vaccinated individuals per day in England                                                                                                                                          | 180,000                                                                                                                                                 | According to data on numbers of vaccinated individuals <sup>8</sup> |
| Interval between the first and second vaccine dose                                                                                                                                                   | 9 weeks                                                                                                                                                 | PHE <sup>19</sup>                                                   |
| Vaccination coverage                                                                                                                                                                                 | 75%, 80%, 85% and 90%, respectively, in adults aged 16-29, 30-39, 40-49, and $\geq 50$ years old.                                                       | Reported vaccination data <sup>8 19</sup> and authors' assumption.  |
| Vaccination coverage sensitivity analyses                                                                                                                                                            | Lower (60%, 70%, and 80%) and higher (80%, 85%, and 90%) in people aged 16-29, 30-39, and 40-49 years old, respectively.                                | Authors' assumptions.                                               |
| Frequency of revaccination programmes                                                                                                                                                                | Number of (days between) repeated vaccination programmes during 2021-2024:<br>1 (...), 2 (365), 3 (365);<br>2 (730), 3 (487), 4 (365), 5 (292), 6 (243) | Authors' assumption                                                 |
|                                                                                                                                                                                                      |                                                                                                                                                         |                                                                     |
|                                                                                                                                                                                                      |                                                                                                                                                         |                                                                     |

We obtained population statistics in England (estimates of mid-year 2020) from Office for National Statistics. It was assumed that all individuals in England were susceptible to SARS-CoV-2 infection at the beginning of 2020. By contacting with infectious individuals, susceptible individuals may be infected, and their infection category is changed from “susceptible” (SU) to “exposed” (EX). “Exposed” refers to the pre-infectious status of infected individuals. According to data from previous studies, the period of incubation before symptom onset was on average 5.5 days,<sup>10</sup> and the exposed individuals start to be infectious about 1.5 days before the onset of symptoms.<sup>7 11</sup> Therefore, we assumed a gamma distribution of incubation period, with a mean non-infectious period of 4 days ( $k=4.0$ ) after being exposed, and a mean infectious period of 1.5 days ( $k=2$ ) before symptom onset (appendix table 1).

Individuals infected with SARS-CoV-2 virus may have no or very mild symptoms (asymptomatic infected), and palpable symptoms (symptomatic patients). As in previous modelling studies<sup>7 11</sup>, it was assumed that asymptomatic individuals can spread SARS-CoV-2 virus before recovery, although the infectious risk was assumed to be 21% of symptomatic patients.<sup>17</sup> We used age-specific rates of asymptomatic cases in the infected individuals, reported in a study based on data from 6 countries (appendix table 1).<sup>9</sup>

Symptomatic patients are further classified into three categories: symptomatic patients who are neither isolated nor hospitalised (mainly at the initial phase of the epidemic), those who are self-isolated at home, those who are hospitalised (see appendix figure 1). We assume that asymptomatic individuals were not isolated, although the average number of daily contacts could be reduced by non-pharmaceutical interventions (NPIs), including social distancing, testing, contact tracing, and lockdown. Assumed proportions of self-isolation of symptomatic cases who are not hospitalised, depending on age and NPI measures are shown in appendix table 1.

1  
2 We assume that only symptomatic patients are hospitalised, and age specific rates of hospitalisation  
3 among symptomatic individuals were from Verity et al.<sup>12</sup> The hospitalisation rates were calibrated  
4 according to reported numbers of hospitalised patients with covid-19 in England.<sup>23</sup> Based on the reported  
5 number of hospitalised patients and estimated number of symptomatic cases, the hospitalisation rate was  
6 estimated to be 70% lower than the estimated by Verity et al.<sup>12</sup> Symptomatic patients are infectious and  
7 can transmit the virus to susceptible people before being hospitalised or isolated. We assume that  
8 hospitalised patients are no longer able to spread the virus to susceptible individuals in the community.  
9 However, infected individuals who are self-isolated at home may transmit virus to household contacts.  
10 The infectious period before recovery was assumed to be gamma distributed, with a mean value of 5  
11 days. Before implementing any NPIs, the infectious period of symptomatic cases was of a mean value  
12 of 4 days (k=4) before being quarantined or hospitalised. After implementing NPI measures, the  
13 infectious period for isolated and hospitalised patients was reduced, having a mean value of 2 days (k=2).  
14 The mean hospital stay was assumed to be 10 days (k=10) (including ICU admitted patients) (appendix  
15 table 1). Verity et al estimated that the average duration from symptom onset to death was 17.8 days.<sup>12</sup>  
16 Therefore, we assume that covid-19 related deaths occur on average 23 days (k=23) after being  
17 exposed/infected.  
18  
19  
20  
21  
22  
23  
24  
25  
26  
27

28 The simulation starts from 1 January 2020, over a period of five years until the end of 2024. We assume  
29 that the first exposed case was imported to England on January 15th 2020, and the daily number of  
30 infectious cases imported was increased by one until 9 February 2020, with a total number of 351 cases  
31 imported in 25 days. The sex-and-age-specific numbers of household and community daily contacts per  
32 person in the UK were obtained from a study in 8 European countries.<sup>18,24</sup> For the purpose of simplicity,  
33 we considered only household contacts (relevant to self-isolation at home) and general daily contacts  
34 (for all types of contacts). The risk of positive transmission per contact between susceptible and  
35 infectious individuals ( $\beta$ ) was estimated by calibrating estimated and reported numbers of covid-19  
36 deaths in England, household and general daily contacts per person, and other model parameters.  
37  
38  
39  
40  
41  
42

43 In this study, all COVID-19 related deaths are assumed to be from symptomatic cases, and age specific  
44 case fatality rates were based on a study by Verity et al.<sup>12</sup> We assume that individuals infected with  
45 Covid-19 will not die from other causes before recovery. Average sex and age specific rates of all-cause  
46 deaths in England during 2015-2019<sup>25</sup> were applied to people who are not infected with or recovered  
47 from covid-19. For simplicity and maintaining a stable population, we assumed that the number of births  
48 at day t equals to the number of all deaths at day t-1. Furthermore, we did not consider the influence of  
49 migration on the population. We adjusted the number of individuals belong to an age group (all <80+)  
50 at the beginning of the year since 2021 by shifting 20% (for age group 0-4 and 5-9) or 10% (for age  
51 group 10-19, ... 70-79) of them to the adjacent higher age group.  
52  
53  
54  
55  
56  
57  
58  
59  
60



## NPI and seasonal impacts on transmission parameters

Since March 2020, NPI measures were recommended and gradually tightened in England, including hand washing, mouth covering when coughing in public places, home isolation of individuals with COVID-19 like symptoms, shielding of vulnerable individuals, avoiding non-essential contacts, and maintaining social distancing. These measures reduced contacts and transmission risk, and shortened the period of transmission by symptomatic individuals. We assumed that the general population's contact rates were reduced by 10% to 40%, depending on age and co-morbidity. Based on the reported number of COVID-19 deaths, we estimate that the transmission risk per contact between infectious and susceptible individuals was reduced from  $\beta=0.094$  before the implementation of any NPIs to 0.069 by 15 March 2020 and 0.062 since May 2020. The UK government put lockdown measures in place from 24 March 2020, including working from home if possible, closure of schools and non-essential shops, pubs and restaurants, avoiding non-essential travelling, and cancelling gathering activities. We assume that numbers of general population contacts were reduced by 60-85% (appendix table 1). We assume that the household contacts were not influenced by the NPI measures.

The lockdown measures in England started to be relaxed from 13 May 2020 by allowing partial returning to work. Further relaxing of control measures followed, including reopening of some shops and allowing outdoor meetings up to six people from 1 June, re-opening of more non-essential shops from 5 June, and further relaxing of restrictions (such as re-opening of pubs and restaurants) from 5 July 2020. However, social distancing measures was maintained and face covering was required where social distancing could not be implemented. From 1 September 2020, schools in England were re-opening. Consequently, the transmission risk per contact between susceptible and infectious individuals was increased since September. The impacts of these changes in NPIs were reflected in the assumed social contacts and transmission risk. Because of the new virus variants,<sup>26</sup> the average transmission risk per contact was increased  $\beta=0.077$  since October 2020, and  $\beta=0.081$  since June 2021.

To incorporate the impact of seasonality on future projections, we assumed that the transmission risk is increased by 10% in September, October, March and April, and increased by 20% in November, December, January and February.

## Model verification/calibration

We used the developed model and initially estimated parameters to simulate the covid-19 epidemic in England from January 2020 to June 2021. Key parameters were calibrated based mainly on reported covid-19 related deaths, although numbers of hospitalised patients and infection rates in England were also considered.

We assume that the first exposed case was imported to England on 15 January 2020, and the number of cases imported each day increased by one more case than the previous day until 9 February 2020 (the total number of cases imported in 25 days was therefore 351). We don't use the reproduction number

( $R_0$  or  $R_t$ ) as an input parameter, but derived the reproduction numbers based on a method used by Giordano and colleagues (see equation 55 in Mathematical equations)<sup>3 27</sup>. We estimated that the basic reproduction number ( $R_0$ ) was 3.63 at the initial stage of the COVID-19 epidemic before any control measures were taken in England, which is similar to findings from previous studies.<sup>7 11</sup> Following the implementation of NPI measures, the estimated reproduction value ( $R_t$ ) was reduced to 0.65 by 24 March. The  $R_t$  value was increased to 0.93 by 5 July 2020 after the NPI measures were relaxed, and  $R_t$  was about 1.09 after school reopening in September and 1.31 by October 2020. The  $R_t$  was reduced to 0.79 since 5 November 2020 after reintroducing NPI measures, increased to about 1.17 after relaxing NPIs since 2 December 2020, and reduced again to about 0.57 since 5 January 2021 after reintroducing lockdown measures (plus rolling out of vaccination) (appendix figure 3). The estimated  $R$  values were within the range of the reported in England (<https://coronavirus.data.gov.uk/>).

### Appendix figure 3: Estimated reproduction numbers, between 01/2020 – 06/2021, in England

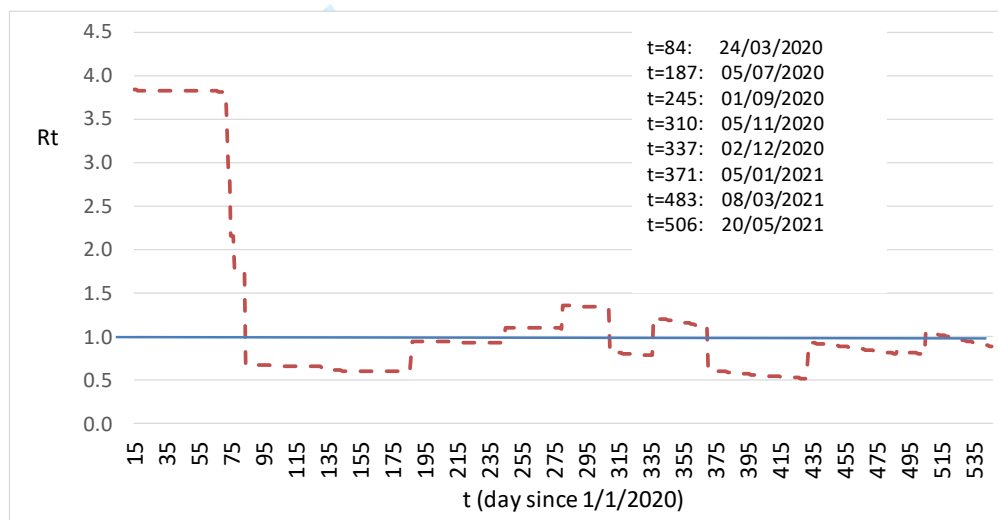

The model estimated that the prevalence of the recovered was 5.5% by 26 April, 7.6% by 24 May, and 8.5% by 24 June 2020, which were similar to the estimated rates of positive antibodies to Covid-19 in the UK (i.e., 7.1% in May-June 2020).<sup>28</sup> Data on the prevalence of infected individuals in the community was available from May 2020. The model estimated prevalence of infected individuals from January 2020 to January 2021, which had a similar trend as the reported prevalence in England (appendix figure 4).

**Appendix figure 4: Estimated and reported prevalence of infection, from January 2020 to June 2021, in England**

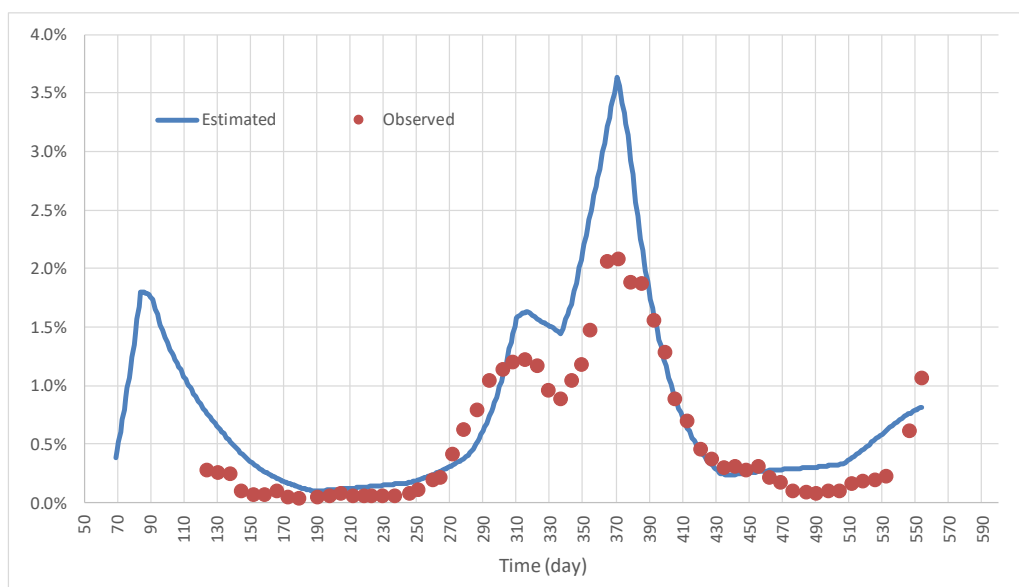

Changes in the estimated numbers of hospitalised COVID-19 patients were of similar trends as the reported numbers of hospitalised patients during 01/2020-01/2021. However, there were considerable differences at peak time points (appendix figure 5), which may be explained by reduced hospitalisation rates during peak period.

**Appendix figure 5: Reported and estimated numbers of hospitalised Covid-19 patients, during 01/2020-01/2021, in England**

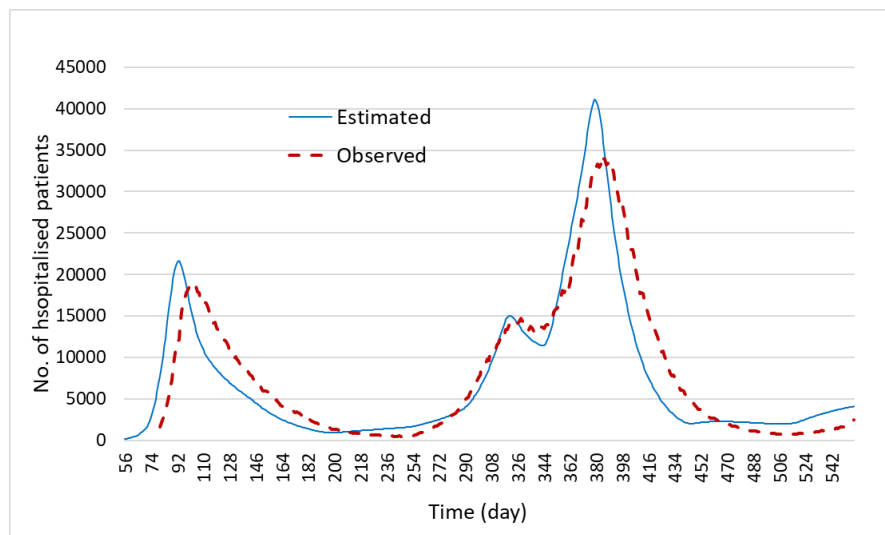

Appendix figure 6 shows that the estimated daily deaths well matched the observed daily deaths from Covid-19, from January 2020 to June 2021, in England.

**Appendix figure 6: Reported and estimated daily deaths from Covid-19, during 01/2020-06/2021, in England**

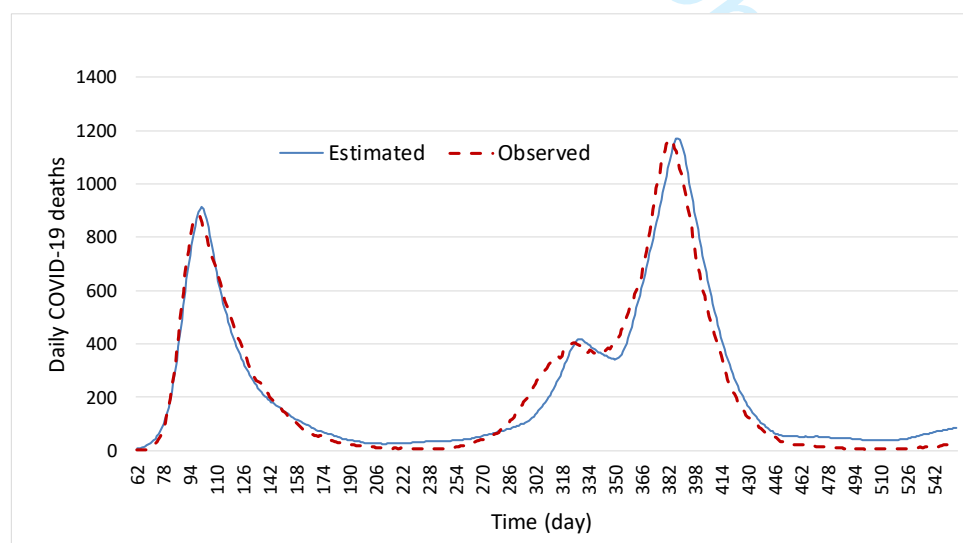

### 3. Vaccination and projection scenarios

We used estimates of transmission parameters, age-specific hospitalisation rates and case fatality rates in June 2021 to project COVID-19 deaths from 2021 to 2024, under various scenarios of vaccine efficacy, durability of both naturally acquired and vaccine induced immunity, and reduction in reinfectivity. There are no more restrictions on social activities since 19 July 2021 in England, and social contacts are return to normal as before the pandemic, but basic hygienic measures would be maintained.

The UK Government's Vaccination Taskforce has recommended rollout of vaccines against COVID-19 to be prioritised primarily by age and comorbidity, with older people being vaccinated first.<sup>29</sup> The Joint Committee on Vaccination and Immunisation (JCVI) in the UK previously recommended COVID-19 vaccination of individuals aged  $\geq 18$ , and also recommended vaccination of young people aged 16-17 years old on 4 August 2021.<sup>30</sup> Vaccination of prioritised individuals began from 8 December 2020 in the UK and around 2 million individuals were vaccinated (mostly with a single dose of Pfizer vaccine) by 10 January 2021.<sup>31</sup> By July 2021, the coverage of individuals who were fully vaccinated (with two doses) was  $>90\%$  in adults aged  $\geq 65$ ,  $80-90\%$  in those aged 50-64,  $60\%$  in adults aged 40-49.<sup>32</sup> For young adults aged 18-39, about  $36\%$  have received the first dose of vaccines by July 2021. Therefore, the vaccination coverage in England has been high in older adults, but it remains uncertain whether such high coverage could be achieved in younger adults. In this study, the mass vaccination is modelled as an age-based phase approach, starting from people aged  $\geq 70$ , followed by individuals aged 60-69, 50-59, 30-49, and then those aged 16-29. We assume that the mass vaccination starts from 1 January 2021, and the maximum number of individuals vaccinated per day is 180,000 in England, to matched with numbers of vaccinated individuals according to the official statistics. In the main analysis, we assume that the uptake rate is  $75\%$ ,  $80\%$ ,  $85\%$  and  $90\%$ , respectively, in adults aged 16-29, 30-39, 40-49, and  $\geq 50$  years old. Because of uncertain coverage of vaccination in younger people, we conducted sensitivity analyses under scenarios with lower ( $60\%$ ,  $70\%$ , and  $80\%$ ) and higher ( $80\%$ ,  $85\%$ , and  $90\%$ ) coverage of vaccination in people aged 16-29, 30-39, and 40-49 years old, respectively.

Results of randomised controlled trials shown that vaccines may be  $>90\%$  efficacious (e.g., Pfizer mRNA vaccine) in reducing severe symptomatic diseases, compared with the placebo group. Assume that  $e_1$  and  $e_2$  are parameters of vaccine's efficacy in blocking virus transmission and reducing symptomatic cases in the infected, respectively (as in appendix figure 2). The reduction in symptomatic cases in the vaccine group may be due to the prevention of infection in susceptible individuals (i.e., infection protection, related to  $e_1$ ), or a lower proportion of infected individuals being symptomatic in the vaccine group (i.e., disease reduction, related to  $e_2$ ), or due to a combination of both. For a vaccine with  $90\%$  efficacy in reducing the number of symptomatic cases (compared with the control group), it is true that  $e_1 \cdot e_2 = (1 - 0.90)$ , or  $e_1 = (1 - 0.90) / e_2$  (note:  $e_1$  and  $e_2 \geq 1$  - overall VE,  $\leq 1$ ). There are many different possible combinations of  $e_1$  and  $e_2$  for an overall efficacy in reducing symptomatic cases. We assume that vaccine efficacy is equally attributable to infection and disease reduction in the main

1  
2 projections. The infection protection (sterilising immunity) after vaccination has been demonstrated. For  
3 example, an observational study in the UK (SIREN) found that the risk of being infected was reduced  
4 by 70% in health workers after a single dose of the Pfizer-BioNTech vaccine.<sup>33 34</sup>  
5  
6

7 Both Pfizer-BioNTech and AstraZeneca vaccines are 2-dose regimens, the policy in the UK has been to  
8 initially provide the first dose to as many individuals as possible to maximise the public health impact.<sup>35</sup>  
9 Exploratory assessment of data from clinical trials found that the short-term vaccine efficacy from the  
10 first dose of the Pfizer-BioNTech vaccine and the AstraZeneca vaccine is about 90% and 70%,  
11 respectively.<sup>35</sup> Public Health England (PHE) in July 2021 estimated that the efficacy was 55-70% after  
12 the first dose, and 70-85% or 85-95% after the second dose.<sup>32</sup> Therefore, we assume that the overall  
13 vaccine efficacy is 62.5% after the first dose and 85% after the second dose. The protection effects start  
14 14 days after the first dose vaccination, and the interval between the first and second dose is 9 weeks.  
15 For vaccines with 62.5% and 85.0% overall efficacy, the equal partial efficacy for the infection  
16 protection and for disease reduction is 38.8% and 61.3%, respectively. The overall vaccine efficacy after  
17 the second dose may be lower than 85.0% due to new variants of SARS-CoV-2 virus. Therefore, we  
18 evaluated two overall vaccine efficacy rates, 62.5% or 85.0%, after the second dose of vaccine.  
19  
20  
21  
22  
23  
24  
25  
26

27 Available evidence has indicated that the duration of sterilising (infection protection) immunity after  
28 coronavirus infection ranges from 0.5 to two years.<sup>1</sup> Serum neutralizing antibodies were detected in all  
29 participants at four months follow up after SAR-CoV-2 mRNA vaccination.<sup>21</sup> Therefore, we assume  
30 that naturally acquired sterilising immunity lasts for 365 or 730 days, and vaccine-induced sterilising  
31 immunity lasts for 182 or 365 days. After waning of sterilising immunity, individuals may be susceptible  
32 again to infection with SARS-CoV-2 virus, but the disease reduction immunity is likely longer lasting.<sup>1</sup>  
33 Due to the existence of disease reduction immunity, the reinfectivity of individuals who are reinfected  
34 after waning of sterilising immunity may be reduced. Lavine and colleagues estimated that the secondary  
35 transmissibility (i.e., reinfectivity) was 35% of the primary transmissibility (i.e., the reinfectivity was  
36 reduced by 65%).<sup>1</sup> Evidence from clinical trials and vaccination in the real world indicated that the viral  
37 loads and the duration of virus shedding in the infected individuals after vaccination were considerably  
38 reduced, compared with unvaccinated individuals.<sup>36 37</sup> Based on preliminary data, PHE estimated that  
39 the reinfectivity was reduced by 35-50% after the first dose of vaccines.<sup>32</sup> The reduction in reinfectivity  
40 is likely to be larger after the second dose of vaccines. More recent studies reported that fully vaccinated  
41 individuals who were infected were up to 78% less likely to transmit the virus to unvaccinated  
42 individuals.<sup>22</sup> Therefore, we assume a range of the risk of reinfectivity after waning of sterilising  
43 immunity; the reinfectivity is reduced by 30%, 45% or 60%. We also assume that the infectivity of  
44 ineffectively vaccinated individuals is the same as recovered individuals whose sterilising immunity has  
45 waned, and that vaccination of individuals recovered from natural infection boosts their naturally  
46 acquired immunity.  
47  
48  
49  
50  
51  
52  
53  
54  
55  
56  
57  
58  
59  
60

1  
2 We considered different frequent scenarios of revaccination programmes. First, we evaluated a single  
3 vaccination programme and multiple (2-4) annual vaccination programmes during 2021-2024. In  
4 addition, simulation projections were conducted by revaccination programmes with different intervals,  
5 including 2-6 revaccination programme and corresponding intervals between them.  
6  
7

8  
9 In summary, projection scenarios are defined from the following aspects: vaccine efficacy, frequency  
10 of revaccination programmes, durability of natural and vaccine induced sterilising immunity, reduction  
11 in reinfectivity after the waning of natural and vaccine-induced immunity against reinfection. The main  
12 characteristics of the simulated scenarios are available in supplementary table 1, supplementary table 2  
13 and supplementary table 3.  
14  
15  
16

17  
18 In this study, we focus on deaths in people infected with COVID-19, although our model also produces  
19 estimates of changes in effective reproduction values ( $R_t$ ), numbers of infected and vaccinated  
20 individuals, and hospitalised patients. We performed multiple simulations under various scenarios. For  
21 clarity, we focus on results of selected scenarios in the main text, but report more data on simulation  
22 results in supplementary tables.  
23  
24  
25  
26  
27  
28  
29  
30  
31  
32  
33  
34  
35  
36  
37  
38  
39  
40  
41  
42  
43  
44  
45  
46  
47  
48  
49  
50  
51  
52  
53  
54  
55  
56  
57  
58  
59  
60

## 4. Model's mathematical equations

### Notations:

- subscript used: “s” refers to sex, 1: male, 2: female, 3: both male and female; “a” refers to age group, 1: 0-4 years, 2: 5-9 years, 3: 10-19, ..., 10:  $\geq 80$ ; 11: all age groups. “t” refers to time (day).
- $N$ : The number of the population
- $\lambda_s$ : Force of infection ( $\lambda$ ) measures the risk (probability) of infection transmission, which is a function of transmission rate ( $\beta$ ) and the prevalence of infectious individuals ( $I$ ) among the population ( $N$ ):  $\lambda = \beta \cdot I/N$ .<sup>3</sup>
- $\beta$ : The transmission rate  $\beta$  in this discrete-time model is defined as the average number of individuals infected daily by an infectious person. It is a function of the number of daily close contacts per person ( $c$ ), and the transmission risk per contact between a susceptible and an infectious individual ( $\eta$ ): i.e.,  $\beta = c \cdot \eta$ .<sup>4</sup>
- $\alpha_1$ : rate of progressing from being exposed to being infectious.
- $\alpha_2$ : rate of progressing from being asymptomatic infectious to symptomatic.
- $\mu$ : proportion of infected individuals who will be symptomatic; age-specific
- $infA$ : The fraction of infection force for infected individuals with no or mild symptoms. It was assumed that  $infA=0.5$  in this study.
- $fS_0$ : fraction of symptomatic patients who will not be quarantined.
- $fS_q$ : fraction of symptomatic patients who will be quarantined (self-isolation).
- $fS_h$ : fraction of symptomatic patients who will be hospitalised (including ICU admission).
- $\gamma_{A0}$ : rate of recovering for asymptomatic individuals
- $\gamma_{S0}$ : rate of recovering for symptomatic, not isolated/hospitalised patients
- $\gamma_{S1}$ : rate of being isolated in symptomatic patients
- $\gamma_{S2}$ : rate of recovering in isolated patients
- $\gamma_{H1}$ : rate of being hospitalised for symptomatic patients
- $\gamma_{H2}$ : rate of recovering in hospitalised patients
- $v_1$ : rate of vaccinating susceptible individuals
- $v_2$ : rate of vaccinating recovered individuals
- $\rho$ : Relative infectivity of the secondary infection ( $I_2$ ) compared with the primary infection ( $I_1$ ). For example, if  $\rho=0.6$ , the infectivity of  $I_2$  is 40% lower than the infectivity of  $I_1$
- $e_1$ : Relative efficacy of vaccine for sterilising immunity, reducing risk of virus transmission
- $e_2$ : Relative efficacy of vaccine for pathology reduction, reducing the proportion of symptomatic cases after being infected
- $IA$ : Asymptomatic individuals
- $IS$ : Symptomatic patients
- $\gamma_a$ : Average rate of recovering of asymptomatic individuals
- $\gamma_s$ : Average rate of recovering of asymptomatic individuals



- $u_v$ : rate of immunity waning in vaccinated individuals
- $u_r$ : rate of immunity waning in recovered individuals
- $drOth_{s,a,t}$ : sex, age-specific risk of deaths from causes other than covid-19, specific by week of the year.
- $drCov_{s,a,t}$ : death risk from infected individuals before recovery, specific according to days since being infected.
- $ds0$ ,  $dsq$ , and  $dhos$  are the proportion of covid-19 deaths among symptomatic patients who are not quarantined, those who are isolated, or hospitalised, respectively.  $1=ds0+dsq+dhos$

Sex and age specific population:

$$N_{s,a,t} = SU_{s,a,t} + SUR_{s,a,t} + VAC1_{s,a,t} + EX1_{s,a,t} + I01_{s,a,t} + EX2_{s,a,t} + I02_{s,a,t} + IA_{s,a,t} + IS0_{s,a,t} + ISQ_{s,a,t} + ISH_{s,a,t} + RE_{s,a,m,t} \quad (1)$$

Total number of the primary infection with no symptoms (age-specific):

$$aIA1_{a,t} = \sum_s (IA1_{s,a,t} + I01_{s,a,t} \cdot (1 - \mu_a)) \quad (2)$$

Total number of the primary infections with symptoms, isolated (age-specific):

$$aISQ1_{a,t} = \sum_s (ISQ1_{s,a,t}) \quad (3)$$

Total number of the primary infections with symptoms, not isolated (age-specific):

$$aIS01_{a,t} = \sum_s (IS01_{s,a,t} + I01_{s,a,t} \cdot \mu_a) \quad (4)$$

Total number of the secondary infection with no symptoms (age-specific):

$$aIA2_{a,t} = \sum_s (IA2_{s,a,t} + I02_{s,a,t} \cdot (1 - \mu_a \cdot e_2)) \quad (5)$$

Total number of the secondary infections with symptoms, isolated (age-specific):

$$aISQ2_{a,t} = \sum_s (ISQ2_{s,a,t}) \quad (6)$$

Total number of the secondary infections with symptoms, not isolated (age-specific):

$$aIS02_{a,t} = \sum_s (IS02_{s,a,t} + I02_{s,a,t} \cdot \mu_a \cdot e_2) \quad (7)$$

Sex and age specific susceptible population:

$$SU_{s,a,t+1} = (SU_{s,a,t} - suExp_{s,a,t} - VAC1_{s,a,t}) \cdot (1 - drOth_{s,a,t}) + NewBirth_{s,t} \quad (8)$$

Note:  $drOth_{s,a,t}$  is sex, age-specific death rates for non-covid causes, specific by week of the year.

Newly exposed/infected with SARS-CoV-2 in susceptible individuals:

$$suExp_{s,a,t} = \sum_{j=1}^{10} SU_{s,a,t} \cdot \eta_t \left( \left( Ca_{a,j,t} \cdot \frac{infA \cdot aIA1_{j,t} + aIS1_{j,t}}{N_{3,j,t}} + Cb_{a,j,t} \cdot \frac{aISQ1_{j,t}}{N_{3,j,t}} \right) + \rho \cdot \left( Ca_{a,j,t} \cdot \frac{infA \cdot aIA2_{j,t} + aIS2_{j,t}}{N_{3,j,t}} + Cb_{a,j,t} \cdot \frac{aISQ2_{j,t}}{N_{3,j,t}} \right) \right) \quad (9)$$

Notes:  $Ca_{a,j,t}$  is the average number of general contacts between people aged  $a$  and  $j$ ; and  $Cb_{a,j,t}$  is the average number of household contacts between people age  $a$  and  $j$ .

Newly exposed/infected in vaccinated individuals:

$$vacExp_{s,a,t} = \sum_{j=1}^{10} VAC1_{s,a,t} \cdot \eta_t \cdot e_1 \left( \left( Ca_{a,j,t} \cdot \frac{infA \cdot aIA1_{j,t} + aIS1_{j,t}}{N_{3,j,t}} + Cb_{a,j,t} \cdot \frac{aISQ1_{j,t}}{N_{3,j,t}} \right) + \rho \cdot \left( Ca_{a,j,t} \cdot \frac{infA \cdot aIA2_{j,t} + aIS2_{j,t}}{N_{3,j,t}} + Cb_{a,j,t} \cdot \frac{aISQ2_{j,t}}{N_{3,j,t}} \right) \right) \quad (10)$$

Newly exposed/infected in the recovered or vaccinated after waning of immunity:

$$sureExp_{s,a,t} = \sum_{j=1}^{10} SURE_{s,a,t} \cdot \eta_t \left( \left( Ca_{a,j,t} \cdot \frac{infA \cdot aIA1_{j,t} + aIS1_{j,t}}{N_{3,j,t}} + Cb_{a,j,t} \cdot \frac{aISQ1_{j,t}}{N_{3,j,t}} \right) + \rho \cdot \left( Ca_{a,j,t} \cdot \frac{infA \cdot aIA2_{j,t} + aIS2_{j,t}}{N_{3,j,t}} + Cb_{a,j,t} \cdot \frac{aISQ2_{j,t}}{N_{3,j,t}} \right) \right) \quad (11)$$

The number of the recovered or vaccinated who lose sterilising immunity ( $d$  from 1 to  $tt$ ):

$$SURE_{s,a,t+1} = (SURE_{s,a,t} - sureEXP_{s,a,t}) \cdot (1 - drOth_{s,a,t}) + \sum_{d=1}^{tt} (iRE_{s,a,d,t} \cdot \omega_{r,d} + iVAC1_{s,a,d,t} \cdot \omega_{v,d}) \quad (12)$$

Notes: “ $tt$ ” is the total number of days simulated.  $\omega_{r,d}$  and  $\omega_{v,d}$  are gamma distributed rate of immunity waning, respectively, a function of days since the recovery and vaccination.  $iRE_{s,a,d,t}$  is the number of recovered since  $d$  days from recovery; and  $iVAC1_{s,a,d,t}$  is the number of vaccinated since  $d$  days after vaccination.

The number of new ( $d=1$ ) primary infections in susceptible individuals:

$$iEX1_{s,a,1,t} = suEXP_{s,a,t} \quad (13)$$

The number of new ( $d=1$ ) secondary infections in recovered or vaccinated individuals:

$$iEX2_{s,a,1,t} = sureEXP_{s,a,t} + vacExp_{s,a,t} \quad (14)$$

For  $d=1,2,3\dots 60$  (assuming all will be dead or recovered by day 60 after being infected):

$$iEX1_{s,a,d+1,t+1} = iEX1_{s,a,d,t} \cdot (1 - \alpha1_d) \quad (15)$$

$$iEX2_{s,a,d+1,t+1} = iEX2_{s,a,d,t} \cdot (1 - \alpha1_d) \quad (16)$$

1  
2 Assumed that covid-19 deaths were from symptomatic patients only. Overall deaths from covid-19 were  
3 calculated using the case fatality rates, and timing of covid-19 related deaths were assumed to have a  
4 gamma distribution according to days since being infected. Therefore a variable was introduced to  
5 record number of symptomatic individuals by days since being exposed/infected to calculate number of  
6 covid-19 deaths:  
7  
8  
9

$$iSY_{s,a,1,t} = \mu_a (suExp_{s,a,t} + e_2 \cdot (surExp_{s,a,t} + vacExp_{s,a,t})) \quad (17)$$

10  
11  
12  
13 For  $d=1,2,3\dots 60$  (the transmission completed by day 60):  
14

$$iSY_{s,a,d+1,t+1} = iSY_{s,a,d,t} \cdot (1 - drCov_{s,a,d}) \quad (18)$$

15  
16  
17  
18 The number of covid-19 deaths at time t:  
19

$$dthCov_{s,a,t} = \sum_{d=1}^{60} iSY_{s,a,d,t} \cdot drCov_{s,a,d} \quad (19)$$

20  
21  
22  
23 The number of new (d=1) primary infections individuals before onset of symptoms:  
24

$$iI01_{s,a,1,t+1} = \sum_{d=1}^{60} iEX1_{s,a,d,t} \cdot \alpha1_d \quad (20)$$

25  
26  
27  
28 The number of new (d=1) secondary infectious individuals before onset of symptoms:  
29

$$iI02_{s,a,1,t+1} = \sum_{d=1}^{60} iEX2_{s,a,d,t} \cdot \alpha1_d \quad (21)$$

30  
31  
32  
33 For  $d=1,2,3\dots 60$  (the transmission completed by day 60):  
34

$$iI01_{s,a,d+1,t+1} = iI01_{s,a,d,t} \cdot (1 - \alpha2_d) \quad (22)$$

$$iI02_{s,a,d+1,t+1} = iI02_{s,a,d,t} \cdot (1 - \alpha2_d) \quad (23)$$

35  
36  
37  
38  
39  
40 The number of all infectious individuals before onset of symptoms:  
41

$$I0_{s,a,t} = \sum_{d=1}^{60} iI0_{s,a,d,t} \quad (24)$$

42  
43  
44  
45 The number of new (d=1) infected individuals with no or very mild symptoms:  
46

$$iIA_{s,a,1,t+1} = \sum_{d=1}^{60} (iI01_{s,a,d,t} \cdot \alpha2_d \cdot (1 - \mu_a) + iI02_{s,a,d,t} \cdot \alpha2_d \cdot (1 - e_2 \mu_a)) \quad (25)$$

47  
48  
49  
50 For  $d=1,2,3\dots 60$  (the transmission completed by day 60):  
51

$$iIA_{s,a,d+1,t+1} = iIA_{s,a,d,t} \cdot (1 - \gamma A_d) \quad (26)$$

52  
53  
54  
55 The number of all infectious individuals with no or mild symptoms:  
56

$$IA_{s,a,t} = \sum_{d=1}^{60} iIA_{s,a,d,t} \quad (27)$$

57  
58  
59  
60 The number of all new (d=1) symptomatic patients:

$$SYM_{s,a,t+1} = \sum_{d=1}^{60} (iI01_{s,a,d,t} + e_2 \cdot iI02_{s,a,d,t}) \cdot \alpha 2_d \cdot \mu_a \quad (28)$$

The number of new (d=1) symptomatic patients who are not self-isolated:

$$iISO_{s,a,1,t} = SYM_{s,a,t} \cdot fS0_t \quad (29)$$

Symptomatic patients (before being isolated or hospitalised):

$$iISO_{s,a,d+1,t+1} = (iISO_{s,a,d,t} - dthCov_{s,a,t} \cdot ds0_d) \cdot (1 - YS0_d) \quad (30)$$

The number of new (d=1) symptomatic patients being isolated/quarantined:

$$iSQ_{s,a,1,t} = SYM_{s,a,t} \cdot fSq_{a,t} \quad (31)$$

Isolated symptomatic patients:

$$iSQ_{s,a,d+1,t+1} = \sum_{d=1}^{60} (iSQ_{s,a,d,t} - dthCov_{s,a,t} \cdot dsq_d) \cdot (1 - YS1_d) \quad (32)$$

The number of new (d=1) symptomatic patients being hospitalised:

$$iSH_{s,a,1,t} = SYM_{s,a,t} \cdot fSh_{a,t} \quad (33)$$

Hospitalised symptomatic patients:

$$iSH_{s,a,d+1,t+1} = \sum_{d=1}^{60} (iSH_{s,a,d,t} - dthCov_{s,a,t} \cdot dsh_d) \cdot (1 - YH1_d) \quad (34)$$

The number newly recovered people (d=1):

$$iRE_{s,a,1,t+1} = \sum_{d=1}^{60} (iIA_{s,a,d,t} \cdot YA0_d + iISO_{s,a,d,t} \cdot YS0_d + iSQ_{s,a,d,t} \cdot YS2_d + iSH_{s,a,d,t} \cdot YH2_d + VAC2_t) \quad (35)$$

Note:  $VAC2_t$  is the number of newly vaccinated individuals who recovered from previous infections.

All recovered for d=1,2,3...tt:

$$iRE_{s,a,d+1,t+1} = (iRE_{s,a,d,t} - VAC2_t) \cdot (1 - \mu r_d) \cdot (1 - drOth_{s,a,t}) \quad (36)$$

All recovered individuals:

$$RE_{s,a,t} = \sum_{d=1}^{tt} iRE_{s,a,d,t} \quad (37)$$

### Derived reproduction values (R0, Rt)

The basic reproduction ratio (R0) is defined as the average number of individuals infected by a typical infectious individual in a total susceptible population, and effective reproduction ratio (Rt) is the number

of individuals infected by an infectious individual when only a proportion of the population are susceptible and the disease transmission dynamic may be influenced by control measures.<sup>38</sup> R values depend on the risk of infection per contact between an infectious and susceptible person, person-to-person contacts between individuals, the rate of transition from exposed to infectious, infectious period, and the prevalence of susceptible individuals in the population.<sup>3</sup> In this study, we don't use the reproduction ratio directly in simulating the spread of SARS-CoV-2 virus. To facilitate the understanding of effects of different intervention strategies, we estimated R0 and Rt during the simulation period, based on average values of relevant parameters and the calculation method used in a modelling study by Giordano et al.<sup>27</sup>

Average values of relevant parameters for estimating R values:

Weighted average fraction of symptomatic individuals in all infected individuals:

$$fS_t = \sum_a (\mu_a \cdot N_{3,a,t} / N_{3,11,t}) \quad (38)$$

Weighted average fraction of hospitalised symptomatic patients:

$$fH_t = \sum_a (fSH_{a,t} \cdot N_{3,a,t} / N_{3,11,t}) \quad (39)$$

Weighted average fraction of symptomatic patients self-isolated:

$$fQ_t = \sum_a (fSQ_{a,t} \cdot N_{3,a,t} / N_{3,11,t}) \quad (40)$$

Risk of daily transmission per infectious individual, depending on asymptomatic or symptomatic, household isolated or not:

$$\beta I0_t = \sum_{a,j=1}^{10} \mu_t \cdot Ca_{a,j,t} \cdot \frac{N_{j,t}}{N_{3,11,t}} \cdot (infA \cdot (1 - fS_t) + fS_t) \quad (41)$$

$$\beta IA_t = \sum_{a,j=1}^{10} \mu_t \cdot Ca_{a,j,t} \cdot \frac{N_{j,t}}{N_{3,11,t}} \cdot infA \cdot (1 - fS_t) \quad (42)$$

$$\beta SQ_t = \sum_{a,j=1}^{10} \mu_t \cdot Cb_{a,j,t} \cdot \frac{N_{j,t}}{N_{3,11,t}} \cdot (infA \cdot (1 - fS_t) + fS_t) \quad (43)$$

$$\beta S0_t = \sum_{a,j=1}^{10} \mu_t \cdot Ca_{a,j,t} \cdot \frac{N_{j,t}}{N_{3,11,t}} \quad (44)$$

The following transition variables are calculated for estimating R values:

$$d1_t = \alpha 2_t \cdot (1 - fS_t) \quad (45)$$

$$d2_t = \alpha 2_t \cdot fS_t \cdot fS0_t \quad (46)$$

$$d3_t = \alpha 2_t \cdot fS_t \cdot fSQ_t \quad (47)$$

$$d4_t = \alpha 2_t \cdot fS_t \cdot fSH_t \quad (48)$$

$$dA1_t = d1_t + d2_t + d3_t + d4_t \quad (49)$$

$$d5_t = \alpha 2_t \cdot (1 - fS_t \cdot e_2) \quad (50)$$

$$d6_t = \alpha 2_t \cdot fS_t \cdot fS0_t \cdot e_2 \quad (51)$$

$$d7_t = \alpha 2_t \cdot fS_t \cdot fSQ_t \cdot e_2 \quad (52)$$

$$d8_t = \alpha 2_t \cdot fS_t \cdot fSH_t \cdot e_2 \quad (53)$$

$$dA2_t = d5_t + d6_t + d7_t + d8_t \quad (54)$$

Effective reproductive value (Rt):

$$Rt = \frac{SU_{3,11,t}}{N_{3,11,t}} \left( \beta I0_t \cdot \frac{1}{dA1_t} + \beta IA_t \cdot \frac{d1_t}{dA1_t \cdot \gamma A0_t} + \beta S0_t \cdot \frac{d2_t}{dA1_t \cdot \gamma S0_t} + \beta SQ_t \cdot \frac{d3_t}{dA1_t \cdot \gamma S1_t} + \beta SH_t \cdot \frac{d4_t}{dA1_t \cdot \gamma H1_t} \right) + \left( \frac{SUr e_{3,11,t}}{N_{3,11,t}} + \frac{VAC_{13,11,t}}{N_{3,11,t}} \cdot e_1 \right) \cdot \rho \cdot \left( \beta I0_t \cdot \frac{1}{dA2_t} + \beta IA_t \cdot \frac{d5_t}{dA2_t \cdot \gamma A0_t} + \beta S0_t \cdot \frac{d6_t}{dA2_t \cdot \gamma S0_t} + \beta SQ_t \cdot \frac{d7_t}{dA2_t \cdot \gamma S1_t} + \beta SH_t \cdot \frac{d8_t}{dA2_t \cdot \gamma H1_t} \right) \quad (55)$$

## 5. Modelling R code and input data files

R code used in this modelling study is provided below. Input data and parameters shown in the code is from a scenario with the following assumptions: annual revaccination during 2021-2024, long-term vaccine efficacy 62.5%, reduction in reinfectivity after waning of immunity 45%. Input data files required for running the R code are provided at the end of this section.

### 5.1 R code used

```
#####
## R code for simulating outbreak of covid-19 in England
#####

tt <-1827      # 1827, from 1/1/20 to 31/12/24

#-----
VAC <- 1      # Vaccination: 1- yes; 0-no
VACtime <-367 # relevant if VAC=1
back.nom <-1  # re-normality from 'back.tim', 1-Yes, 0-No
back.tim <-566 # t=566:19/7/2021
ASYinf <-0.21 # Relative infectivity of asymptomatic cases

dGap <-365    # Interval between vac waves (day)

# VAC coverage for age groups
vac.crg1 <-0.75 # 0.60 VAC coverage age 16-29
vac.crg2 <-0.80 # 0.70 VAC coverage age 30-39
vac.crg3 <-0.85 # 0.80 VAC coverage age 40-49
vac.crg4 <-0.90 # 0.90 VAC coverage age 50+

bta.nom <- 0.081 # from back.tim
#+-----+

nRvac <-4      # revaccination waves
InfI2 <-0.45   # Relative infectivity after immunity loss
rVEinf1 <-0.3876 # Efficacy of vaccine dose-1 on transmission risk
rVESym1 <-0.3876 # Efficacy of vaccine dose-1 on reduced symptomatic cases
rVEinf2 <-0.6127 # Efficacy of vaccine dose-2 on transmission risk
rVESym2 <-0.6127 # Efficacy of vaccine dose-2 on reduced symptomatic cases
rVEinf3 <-0.3876 # Long-term VE on infection
rVESym3 <-0.3876 # Long-term VE on symptoms
rWinter1 <- 1.10 # Winter transmissibility: Sep-Oct, Mar-Apr
rWinter2 <- 1.20 # Winter transmissibility: Nov-Feb
pIM <-1        # Natural immunity: 1-long-lived; 0-short-lived
gwan.m <-730   # mean durability (days) of immunity
gwan.s <-27.019 # gamma shape k
pIMv <-1       # Vaccine immunity 1:long-lived; 0:short-lived
gwanv.m <-365  # mean durability (days) of vaccine immunity
gwanv.s <-19.105 # gamma shape k

##+-----+
## Vaccination timing, waves and age groups
##-----
vac.AGP <- array(0, dim=c(7)) # no. of agegroups to be vaccinated phase 1-6
vac.tim <- array(0, dim=c(18)) # starting time of each vaccination wave
vaggp <- array(0, dim=c(18,7)) # agegroup (Vp:1-6, age 1,2)
#-----
vac.tim[1] <-VACtime
if(nRvac>1) {
  for(rev in 2:nRvac) {
    vac.tim[rev] <- vac.tim[rev-1] +dGap # time of re-vaccination
  }
}
```

```

1
2     vac.dmaxi <- 180000      # Maximum no. of individuals vaccinated
3 #-----
4         vac.AGP[1] <-6      # 1: 70+; 2: 60-69; 3: 50-59;
5                               # 4: 40-49; 5: 20-39; 6: 16(10)-19
6     if(nRvac>1)            {
7     for(rev in 2:nRvac) {
8         vac.AGP[rev] <-6
9     }
10 #-----
11 # Age ranges for vaccination from age phase 1 to 4
12 #-----
13     vagp[1,1] <- 9          # age grp 9:      70+
14     vagp[1,2] <- 10         # age grp 10:   85+
15     vagp[2,1] <- 8          # age grp 8:    60-69
16     vagp[2,2] <- 8          # age grp 8:    50-59
17     vagp[3,1] <- 7          # age grp 7:    40-49
18     vagp[3,2] <- 7          # age grp 7:    30-39
19     vagp[4,1] <- 6          # age grp 6:    20-29
20     vagp[4,2] <- 6          # age grp 6:    10-19
21     vagp[5,1] <- 4          # age grp 5:    (40% for 16-19)
22     vagp[5,2] <- 5          # age grp 5:
23     vagp[6,1] <- 3          # age grp 4:
24     vagp[6,2] <- 3          # age grp 3:
25 #=====
26     ts <- 15                # Epidemic simulation start from 01/02/2020
27     seeds <-1              # Inital no. of exposed/infected
28     dv0 <-14               # Days required for developing immunity after vaccination
29     tv0 <-63               # duration between dose-1 and dose-2: 9 weeks on average
30     tw0 <-tt               # longest duration before immunity loss in recovered
31     dd <-60                # maximum days from exposed to recover or death.
32     tm0 <-tt               # only used for defining death risk by days when tt<1096
33     tage <-367             # t starting to shift age up
34 #=====
35 #####
36     beta <- array(0, dim=c(tt)) # Infection risk per contact between susceptible and infected
37     adjHsp <- array(0, dim=c(tt)) # Adjust ratio for hospitalisation rate
38     adjDth <- array(0, dim=c(tt)) # Adjust case fatality to hospital fatality
39 #=====#
40 ## Calibrate beta[t], adjHsp, adjDth
41 #=====#
42 for(t in 1:tt) { # No covid epidemdic before ts
43     beta[t] <-0.094
44 #-----
45     if(NPI==1) {
46 #-----
47         if(t>74) { # t> 15/03/2020
48             beta[t] <- 0.069 # social distancing
49             } #
50         if(t>83) { # t> 23/03/2020
51             beta[t] <-0.066 # Lockdown date
52             } #
53         if(t>132) { # t=132:11/05/2020
54             beta[t] <-0.062 # Advised wearing face covering
55             } #
56         if(t>280) { # t=291: 17/10/2020:
57             beta[t] <-0.077 # Increased transmissibility by new variant
58             } #
59         if(t>487) { # t>= 01/05/2021
60             beta[t] <-0.081 # new delta variant
61             } #
62         if(back.nom==1) { # Returning to normal life
63         if(t>(back.tim-1)) {
64             beta[t] <-bta.nom
65         }

```



```

1
2
3
4
5
6
7
8
9
10
11
12
13
14
15
16
17
18
19
20
21
22
23
24
25
26
27
28
29
30
31
32
33
34
35
36
37
38
39
40
41
42
43
44
45
46
47
48
49
50
51
52
53
54
55
56
57
58
59
60

```

```

    }
  } # end if NPI==1
} # for t in ts:tt

#=====  

# Ratio for adjusting case fatality rate  

#=====  

  for(t in 1:tt) {
    adjDth[t] <- 2.00 # higher death rate initially
    if(t>91) { adjDth[t] <- 1.80 } # t=92: 1/4/20:  

    if(t>100) { adjDth[t] <- 1.60 }  

    if(t>110) { adjDth[t] <- 1.40 }  

  } # end t in ts:tt

#=====  

# Ratio for calibrating hospitalisation rate  

#=====  

  for(t in 1:tt) { adjHsp[t] <-0.30 }

##=====  

## output files for simulation results  

##-----  

Header.scen <-cbind("Time", "Rt", "POP_N", "SUS", "SUS.rec", "SUS.vac", "RE", "VAef1", "VAef2", "New.VAC",  

  "New_Exp", "New_Sym", "New_HS", "HS_pts", "Infect_sum", "DthCov-day", "DthCov_cum",  

  "DthAll_day") # End Header.out  

OFileName <- paste("...\\ResOut".out", sep="")  

write.table(Header.scen, file=OFileName, sep="t", quote=FALSE,  

  append=FALSE, row.names=FALSE, col.names=FALSE)

##=====  

## Definition of Population and other key variables  

##-----  

N <- array(0, dim=c(tt,3,11)) # Total population[t,sex,age,cmb]  

SU <- array(0, dim=c(tt,3,11)) # Suceptable[t,sex,age,cmb]  

EX <- array(0, dim=c(tt,3,11)) # Exposed[t,sex,age,cmb]  

EXv1 <- array(0, dim=c(tt,3,11)) # Exposed in vaccinated  

EXv2 <- array(0, dim=c(tt,3,11))  

I0 <- array(0, dim=c(tt,3,11)) # Infected -presymptomatic  

I0v1 <- array(0, dim=c(tt,3,11)) # Infected -presymptomatic in vaccinated  

I0v2 <- array(0, dim=c(tt,3,11))  

IM0 <- array(0, dim=c(tt,3,11)) # Infected no quarantine -mild  

IM0v <- array(0, dim=c(tt,3,11)) # Infection after vaccination or reinfection  

IS0 <- array(0, dim=c(tt,3,11)) # Infected no quarantine/no hospital -severe  

IS0v <- array(0, dim=c(tt,3,11)) # Infection after vaccination or reinfection  

ISq <- array(0, dim=c(tt,3,11)) # To be quarantined -severe  

ISqv <- array(0, dim=c(tt,3,11)) # Infection after vaccination or reinfection  

ISh <- array(0, dim=c(tt,3,11)) # To be hospitalised  

IShv <- array(0, dim=c(tt,3,11)) # Infection after vaccination or reinfection  

QS <- array(0, dim=c(tt,3,11)) # Quarantined -severe  

Qsv <- array(0, dim=c(tt,3,11))  

HS <- array(0, dim=c(tt,3,11)) # Hospitalised -severe  

HSv <- array(0, dim=c(tt,3,11))  

RE <- array(0, dim=c(tt,3,11)) # Recovered

eRE <- array(0, dim=c(tt,tw0,3,11)) # By days since recovered/vacciated for waning immunity

SU.vac <- array(0, dim=c(tt,3,11)) # Suceptable from vaccinated  

SU.rec <- array(0, dim=c(tt,3,11)) # Suceptable from recovered clinical  

vac.SU <- array(0, dim=c(tt,3,11)) # Vaccinated suceptable[t,sex,age,cmb]  

vac.SUvac <- array(0, dim=c(tt,3,11)) # vaccinated in loss of vaccine immunity  

vac.SUrec <- array(0, dim=c(tt,3,11)) # vaccination of loss immunity in clinical recovered

eEX <- array(0, dim=c(tt,dd,3,11)) # Exposed[t,sex,age,cmb]  

eEXv1 <- array(0, dim=c(tt,dd,3,11)) # Exposed in vaccinated  

eEXv2 <- array(0, dim=c(tt,dd,3,11))  

eI0 <- array(0, dim=c(tt,dd,3,11)) # Infected -presymptomatic  

eI0v1 <- array(0, dim=c(tt,dd,3,11)) # Infected -presymptomatic in vaccinated  

eI0v2 <- array(0, dim=c(tt,dd,3,11))  

eIM0 <- array(0, dim=c(tt,dd,3,11)) # Infected no quarantine -mild  

eIM0v <- array(0, dim=c(tt,dd,3,11))

```

```

1
2 eIS0 <- array(0, dim=c(tt,dd,3,11)) # Infected no quarantine/no hospital -severe
3 eIS0v <- array(0, dim=c(tt,dd,3,11))
4 eISq <- array(0, dim=c(tt,dd,3,11)) # To be quarantined -severe
5 eISqv <- array(0, dim=c(tt,dd,3,11))
6 eISh <- array(0, dim=c(tt,dd,3,11)) # To be hospitalised
7 eIShv <- array(0, dim=c(tt,dd,3,11))
8 eQS <- array(0, dim=c(tt,dd,3,11)) # Quarantined -severe
9 eQSv <- array(0, dim=c(tt,dd,3,11))
10 eHS <- array(0, dim=c(tt,dd,3,11)) # Hospitalised -severe
11 eHSv <- array(0, dim=c(tt,dd,3,11))
12
13 VA0 <- array(0, dim=c(tt,3,11)) # Vaccinated before immunity developed
14 VAef1 <- array(0, dim=c(tt,3,11)) # Successful partial immunised
15 VAef2 <- array(0, dim=c(tt,3,11))
16 eVA0 <- array(0, dim=c(tt,dv0,3,11)) # Specify days since vaccination 1-14 days
17 eVAef1 <- array(0, dim=c(tt,tv0,3,11)) # by days since vaccinated dose-1
18 eVAef2 <- array(0, dim=c(tt,tw0,3,11)) # by days since vaccinated dose-2
19
20 eInf <- array(0, dim=c(tt,dd,3,11)) # Tracing with days since exposed/infected
21 eInfv <- array(0, dim=c(tt,dd,3,11)) # Tracing with days since exposed/infected in reinfected
22 Infect.sum <- array(0, dim=c(tt)) # Total no. of infected at t
23
24 #-----
25 # Temproary variable for up shifting ages
26
27 jN <- array(0, dim=c(10)); jSU <- array(0, dim=c(10)); jSU.vac <- array(0, dim=c(10))
28 jSU.rec <- array(0, dim=c(10)); jRE <- array(0, dim=c(10)); jEX <- array(0, dim=c(10))
29 jI0 <- array(0, dim=c(10)); jIM0 <- array(0, dim=c(10)); jIS0 <- array(0, dim=c(10))
30 jISq <- array(0, dim=c(10)); jISh <- array(0, dim=c(10)); jQS <- array(0, dim=c(10))
31 jHS <- array(0, dim=c(10))
32
33 jEXv1 <- array(0, dim=c(10)); jI0v1 <- array(0, dim=c(10))
34 jEXv2 <- array(0, dim=c(10)); jI0v2 <- array(0, dim=c(10)); jIM0v <- array(0, dim=c(10))
35 jIS0v <- array(0, dim=c(10)); jISqv <- array(0, dim=c(10)); jIShv <- array(0, dim=c(10))
36 jQSv <- array(0, dim=c(10)); jHSv <- array(0, dim=c(10)); jVA0 <- array(0, dim=c(10))
37 jVAef1 <- array(0, dim=c(10)); jVAef2 <- array(0, dim=c(10))
38
39 jeEX <- array(0, dim=c(dd,10)); jeI0 <- array(0, dim=c(dd,10)); jeIM0 <- array(0, dim=c(dd,10))
40 jeIS0 <- array(0, dim=c(dd,10)); jeISq <- array(0, dim=c(dd,10)); jeISh <- array(0, dim=c(dd,10))
41 jeQS <- array(0, dim=c(dd,10)); jeHS <- array(0, dim=c(dd,10))
42
43 jeEXv1 <- array(0, dim=c(dd,10)); jeI0v1 <- array(0, dim=c(dd,10)); jeEXv2 <- array(0, dim=c(dd,10))
44 jeI0v2 <- array(0, dim=c(dd,10))
45
46 jeIM0v <- array(0, dim=c(dd,10)); jeIS0v <- array(0, dim=c(dd,10)); jeISqv <- array(0, dim=c(dd,10))
47 jeIShv <- array(0, dim=c(dd,10)); jeQSv <- array(0, dim=c(dd,10)); jeHSv <- array(0, dim=c(dd,10))
48 jeInf <- array(0, dim=c(dd,10)); jeInfv <- array(0, dim=c(dd,10))
49
50 jeVA0 <- array(0, dim=c(dv0,10)); jeVAef1 <- array(0, dim=c(tv0,10)); jeVAef2 <- array(0, dim=c(tw0,10))
51 jeRE <- array(0, dim=c(tw0,10))
52
53 #-----
54 HS.new <- array(0, dim=c(tt,3,11)) ; allHS <- array(0, dim=c(tt))
55
56 Bsex <- array(0, dim=c(2)) # % sex ratio for births
57 dBth <- array(0, dim=c(11)) # No. of births/day, note: dBth[>1] <-0
58
59 I.i0 <- array(0, dim=c(tt,11)) # total no. of pre-clin infectious
60 I.m0 <- array(0, dim=c(tt,11)) # total no. of mild cases - not quarantined
61 I.m <- array(0, dim=c(tt,11))
62 I.s0 <- array(0, dim=c(tt,11)) # total no. of severe cases - not quarantined
63 I.s <- array(0, dim=c(tt,11))
64 I.sq <- array(0, dim=c(tt,11)) # total no. of severe cases - quarantined
65 I.i0v <- array(0, dim=c(tt,11)) # total no. of pre-clin infectious
66 I.m0v <- array(0, dim=c(tt,11)) # total no. of mild cases - not quarantined
67 I.mv <- array(0, dim=c(tt,11))
68 I.s0v <- array(0, dim=c(tt,11)) # total no. of severe cases - not quarantined
69 I.sv <- array(0, dim=c(tt,11))
70 I.sqv <- array(0, dim=c(tt,11)) # total no. of severe cases - quarantined

```

```

1
2
3 IAI <- array(0, dim=c(tt))
4
5 Rt <- array(0, dim=c(tt))
6 exposed.n <- array(0, dim=c(tt))
7
8 drisk.inf <- array(0, dim=c(2,11)) # death risk in symptomatic cases
9 rHosp <- array(0, dim=c(11)) # Case hospitalisation rate
10
11 rADth0 <- array(0, dim=c(366,3,11)) # 5yr average death rate/1000/day without comorbidity
12
13 nDth.inf <- array(0, dim=c(tt,3,11)) # Covid related deaths -all
14 nDth.s0 <- array(0, dim=c(tt,dd,3,11)) # Covid related deaths -infected
15 nDth.sq <- array(0, dim=c(tt,dd,3,11)) # Covid related deaths -infected
16 nDth.ss <- array(0, dim=c(tt,3,11)) # Covid related deaths -outside hospital
17 nDth.hos <- array(0, dim=c(tt,dd,3,11)) # Covid related deaths-hospital
18
19 nDth.infv <- array(0, dim=c(tt,3,11)) # Covid related deaths -all
20 nDth.s0v <- array(0, dim=c(tt,dd,3,11)) # Covid related deaths -infected
21 nDth.sqv <- array(0, dim=c(tt,dd,3,11)) # Covid related deaths -infected
22 nDth.ssv <- array(0, dim=c(tt,3,11)) # Covid related deaths -outside hospital
23 nDth.hosv <- array(0, dim=c(tt,dd,3,11)) # Covid related deaths-hospital
24
25 nDth.cov <- array(0, dim=c(tt,3,11)) # Covid related deaths
26 nDth.oth <- array(0, dim=c(tt,3,11)) # no. of other deaths in SU, RE and VAC
27
28 nDth.all <- array(0, dim=c(tt,3,11)) # All cause deaths including covid & non-covid deaths
29 nDthHos.all <- array(0, dim=c(tt,3,11)) # All cause deaths including covid & non-covid deaths
30 nDthHos.allv <- array(0, dim=c(tt,3,11))
31
32 nDthcum.cov <- array(0, dim=c(tt)) # Covid related deaths -Cumulative
33
34 beta2.i0 <- array(0, dim=c(tt)); beta2.m0 <- array(0, dim=c(tt)); beta2.mq <- array(0, dim=c(tt))
35 beta2.s0 <- array(0, dim=c(tt)); beta2.sq <- array(0, dim=c(tt)); beta2.al <- array(0, dim=c(tt))
36
37 dk <- array(0, dim=c(tt,18)); dA <- array(0, dim=c(tt)); dAv1 <- array(0, dim=c(tt))
38 dAv2 <- array(0, dim=c(tt))
39
40 gdh.inf <- array(0, dim=c(dd)) # gamma distribution of deaths by days since infected
41 gdh.hos <- array(0, dim=c(dd)) # gamma distribution of deaths by days since hos admin
42 alp1 <- array(0, dim=c(dd)) # Transition rate from exposed to IO
43 alp2 <- array(0, dim=c(dd)) # Transition rate from IO to I_clinical
44 gm0.m <- array(0, dim=c(tt)) # gamma mean from IM0 to RE
45 gm0.s <- array(0, dim=c(tt)) # gamma sd
46 gs0.m <- array(0, dim=c(tt)) # gamma mean from IS0 to RE
47 gs0.s <- array(0, dim=c(tt)) # gamma sd
48 gs1.m <- array(0, dim=c(tt)) # gamma mean from ISq to QS
49 gs1.s <- array(0, dim=c(tt)) # gamma sd
50 gs2.m <- array(0, dim=c(tt)) # gamma mean from QS to RE
51 gs2.s <- array(0, dim=c(tt)) # gamma sd
52 gh1.m <- array(0, dim=c(tt)) # gamma mean from ISh to HS
53 gh1.s <- array(0, dim=c(tt)) # gamma sd
54 gh2.m <- array(0, dim=c(tt)) # gamma mean from HS to RE
55 gh2.s <- array(0, dim=c(tt)) # gamma sd
56
57 # Day since infection specific transition rates:
58 gam.m0 <- array(0, dim=c(tt,dd)) # duration from IM0 to RE
59 gam.s0 <- array(0, dim=c(tt,dd)) # duration from IS0 to RE
60 gam.s1 <- array(0, dim=c(tt,dd)) # duration from ISq to QS
61 gam.s2 <- array(0, dim=c(tt,dd)) # duration from QS to RE
62 gam.h1 <- array(0, dim=c(tt,dd)) # duration from ISh to HS
63 gam.h2 <- array(0, dim=c(tt,dd)) # duration from HS to RE
64
65 # Average transition rates for estimating Rt
66 gam.m0a <- array(0, dim=c(tt)) # duration from IM0 to RE
67 gam.s0a <- array(0, dim=c(tt)) # duration from IS0 to RE
68 gam.s1a <- array(0, dim=c(tt)) # duration from ISq to QS
69 gam.s2a <- array(0, dim=c(tt)) # duration from QS to RE
70 gam.h1a <- array(0, dim=c(tt)) # duration from ISh to HS
71 gam.h2a <- array(0, dim=c(tt)) # duration from HS to RE

```

```

1
2
3 gimm.wan <- array(0, dim=c(tw0)) # Distribution of immunity waning
4 gimmv.wan <- array(0, dim=c(tw0)) # Distribution of vaccine immunity waning
5
6 cum_gdth.inf <- array(0, dim=c(dd)) # gamma distribution of deaths by days since infected
7 cum_gdth.hos <- array(0, dim=c(dd)) # gamma distribution of deaths by days since hos admin
8 cum_alp1 <- array(0, dim=c(dd)) # Transition rate from exposed to I0
9 cum_alp2 <- array(0, dim=c(dd)) # Transition rate from I0 to I_clinical
10 cum_gm0.m <- array(0, dim=c(tt)) # gamma mean from IM0 to RE
11 cum_gm0.s <- array(0, dim=c(tt)) # gamma sd
12 cum_gs0.m <- array(0, dim=c(tt)) # gamma mean from IS0 to RE
13 cum_gs0.s <- array(0, dim=c(tt)) # gamma sd
14 cum_gs1.m <- array(0, dim=c(tt)) # gamma mean from ISq to QS
15 cum_gs1.s <- array(0, dim=c(tt)) # gamma sd
16 cum_gs2.m <- array(0, dim=c(tt)) # gamma mean from QS to RE
17 cum_gs2.s <- array(0, dim=c(tt)) # gamma sd
18 cum_gh1.m <- array(0, dim=c(tt)) # gamma mean from ISh to HS
19 cum_gh1.s <- array(0, dim=c(tt)) # gamma sd
20 cum_gh2.m <- array(0, dim=c(tt)) # gamma mean from HS to RE
21 cum_gh2.s <- array(0, dim=c(tt)) # gamma sd
22
23 # Day since infection specific transition rates:
24 cum_gam.m0 <- array(0, dim=c(tt,dd)) # duration from IM0 to RE
25 cum_gam.s0 <- array(0, dim=c(tt,dd)) # duration from IS0 to RE
26 cum_gam.s1 <- array(0, dim=c(tt,dd)) # duration from ISq to QS
27 cum_gam.s2 <- array(0, dim=c(tt,dd)) # duration from QS to RE
28 cum_gam.h1 <- array(0, dim=c(tt,dd)) # duration from ISh to HS
29 cum_gam.h2 <- array(0, dim=c(tt,dd)) # duration from HS to RE
30
31 # Average transition rates for estimating Rt
32 cum_gam.m0a <- array(0, dim=c(tt)) # duration from IM0 to RE
33 cum_gam.s0a <- array(0, dim=c(tt)) # duration from IS0 to RE
34 cum_gam.s1a <- array(0, dim=c(tt)) # duration from ISq to QS
35 cum_gam.s2a <- array(0, dim=c(tt)) # duration from QS to RE
36 cum_gam.h1a <- array(0, dim=c(tt)) # duration from ISh to HS
37 cum_gam.h2a <- array(0, dim=c(tt)) # duration from HS to RE
38
39 cum_gimm.wan <- array(0, dim=c(tw0)) # Distribution of immunity waning
40 cum_gimmv.wan <- array(0, dim=c(tw0)) # Distribution of vaccine immunity waning
41
42 rFm <- array(0, dim=c(11)) # % from I0 to Mild -age-specific
43 rFsq <- array(0, dim=c(tt,11)) # % from I0 to QS
44 rFhos <- array(0, dim=c(tt,11)) # % from I0 to HS
45
46 rFhos.al <- array(0, dim=c(tt)); rFm.al <- array(0, dim=c(tt)); rFsq.al <- array(0, dim=c(tt))
47
48 New.expsu <- array(0, dim=c(tt,3,11)) # Newly exposed in SU
49 New.expv0 <- array(0, dim=c(tt,3,11)) # Newly exposed in VA0
50 New.expv1 <- array(0, dim=c(tt,3,11)) # Newly exposed in VAef1
51 New.expv2 <- array(0, dim=c(tt,3,11)) # Newly exposed in VAef2
52 New.expal <- array(0, dim=c(tt,3,11)) # Newly exposed -all
53
54 Expv0 <- array(0, dim=c(tt,dv0,3,11)) # Newly exposed in VA0 by day
55 Expv1 <- array(0, dim=c(tt,tv0,3,11)) # Newly exposed in VAef by day
56 Expv2 <- array(0, dim=c(tt,tt,3,11))
57
58 New.explosv1 <- array(0, dim=c(tt,3,11)) # Newly exposed due to loss immunity in vaccinated
59 New.explosrec <- array(0, dim=c(tt,3,11)) # Newly exposed due to loss immunity in recovered
60
61 New.vac <- array(0, dim=c(tt,3,11)) # Newly vaccinated
62
63 New.sym <- array(0, dim=c(tt,3,11)) # New symptomatic
64
65 eSeed <- array(0, dim=c(tt,dd,3,11)) # Seeds of exposed
66 Seed.all <- array(0, dim=c(tt,3,11)) # Seeds of exposed
67
68 CMTa <- array(0, dim=c(11,11)) # Contact matrix by age for all contacts symmetric
69 CMTh <- array(0, dim=c(11,11)) # Contact matrix by age for home contacts symmetric
70
71 adjCNTa <- array(0, dim=c(tt,11)) # adjust no. of Contacts at home by age & m

```

```

1
2
3       V.day    <- array(0, dim=c(18,7))           # no. of days for vaccination (age grp 1-6)
4       V.dmax  <- array(0, dim=c(18,7))           # maximum vaccinated per day by age grp (1-6)
5       T.vac   <- array(0, dim=c(18,7))           # maximum vaccinated per day by age grpe (1-6)
6       vacend  <- array(0, dim=c(18,7))           # End date for vaccinating group Vp
7
8     ## READ: data on initial population 01-01-2020
9
10    inPOP <- read.table(file="...\\inPOPEng20.csv", header=TRUE, sep=",")
11
12    # Obtain data on initial population in England 2020 (start of the year)
13
14    for(a in 1:10) { # Input UK population
15
16      N[1,1,a] <- inPOP[a,3]*1000 # male all
17      N[1,2,a] <- inPOP[a,4]*1000 # female all
18
19      drisk.inf[1,a] <- inPOP[a,5] # case fatality male
20      drisk.inf[2,a] <- inPOP[a,6] # case fatality female
21
22      rHosp[a] <- inPOP[a,7] # Hospitalisation rate (cases)
23    } # End input POP data
24
25    #-----
26    for(s in 1:2) {
27      for(a in 1:10) {
28        N[1,3,11] <- N[1,3,11] + N[1,s,a]; N[1,s,11] <- N[1,s,11] + N[1,s,a]; N[1,3,a] <- N[1,3,a] + N[1,s,a]
29        SU[1,s,a] <- N[1,s,a]; SU[1,3,11] <- SU[1,3,11] + SU[1,s,a]
30      }
31    }
32
33    ## =====
34    ## Birth related parameters, note: CMB[s,a]
35    ## =====
36
37    dBth[1] <- 1800 # No. of births per day; for day-1 only
38    # dBth =no. of deaths/day for other days
39
40    Bsex[1] <- 0.512 # male %
41    Bsex[2] <- 0.488 # female %
42
43    ## READ: data on 5 year (2015-2019) average death rate/1000/day
44
45    inAllDth <- read.table(file="...\\inDTH1519Eng10.csv", header=TRUE, sep=",")
46
47    d <- 1 # day from 1 to 364=7x52
48    for(w in 1:52) { # Input death rate for male week 1-52
49      for(dw in 1:7) {
50        for(a in 1:10) {
51          cc <- a+1
52          rADth0[d,1,a] <- inAllDth[w,cc]/1000
53        } # end a in 1:10
54        d <- d+1
55      } # end for dw in 1:7
56    } # end for w in 1:52
57
58    d <- 1 # day from 1 to 364=7x52
59    for(w in 53:104) { # Input death rate for female week 1-52
60      for(dw in 1:7) {
61        for(a in 1:10) {
62          cc <- a+1
63          rADth0[d,2,a] <- inAllDth[w,cc]/1000
64        } # end a in 1:10
65        d <- d+1
66      }
67    }
68
69    for(s in 1:2) {
70      for(a in 1:10) {
71        rADth0[365,s,a] <- rADth0[364,s,a] # 366 days in 2020
72        rADth0[366,s,a] <- rADth0[364,s,a] # 366 days in 2020
73      }
74    }

```

```

1
2         }
3
4 ## READ: contact matrix all and at home
5     inCM <-read.table(file="...\\inCMATRIX10.csv", header=TRUE, sep=",")
6
7     for(a in 1:10) { # Input Contact matrix data
8     for(j in 1:10) {
9         # All contacts (for community transmission)
10            ca <-j+1
11            CMTa[a,j] <-inCM[a,ca]
12        # Contacts at home (for home isolation)
13            ch <-j+11
14            CMTh[a,j] <-inCM[a,ch]
15        }
16    }
17
18 ##-----
19 ## Key input parameters
20 ##-----
21 # % of mild illness among infected - age-specific, constant overtime
22 # Data source: Davies et al Nature Med: Age-dependent effects in transmission
23 for(a in 1:2) { rFm[a] <- 0.71 } # age 0-9
24               rFm[3] <- 0.79   # age 10-19
25               rFm[4] <- 0.73   # age 20-29
26               rFm[5] <- 0.67   # age 30-39
27               rFm[6] <- 0.60   # age 40-49
28               rFm[7] <- 0.51   # age 50-59
29               rFm[8] <- 0.37   # age 60-69
30 for(a in 9:10) { rFm[a] <- 0.31 } # age 70+
31
32 #-----
33 # Verity et al:
34 # 17.8 days from onset to deaths
35
36 gdh.m <-23.0 # mean days from exposed to deaths
37 gdh.s <-4.796 # sd
38
39 # READ: data on other input parameters
40
41 inParam <-read.table(file="...\\inParamet20.csv", header=TRUE, sep=",")
42
43 for(t in ts:tt) { # Epidemic simulation starts from ts
44     if(t>(ts-1)) { ### t>ts
45         c <-2 # data column
46     }
47 }
48
49 #-----
50 # Effects of NPI control measures
51 #-----
52 # Control-1: case based self-isolation mandated on 12/03/2020
53 # Reduced infectious periods for symptomatic patients since 13/03/2020
54 #-----
55 if(t>72) { # after date: 12/03/2020 -self isolation of symptomatic individuals
56     c <-3
57 }
58 #-----
59 # Control-2: Social distance encouraged in the UK 16/03/2020
60 # shielding of vulnerable people
61 #-----
62 if(t>76) { # After date 16/03/2020 -social distance
63     c <-4
64 }
65 #-----
66 # Control-3: lockdown from 24/03/2020 in the UK; stay at home and other restrictions
67 #-----
68 if(t>83) { # lockdown initial
69     c <-5
70 }
71 #-----
72 # On 4 July 2020: third step in easing national restrictions

```

```

1
2 # including 2m => 2m or 1m social distancing, restaurants/pubs
3 # reopening, holiday accommodations, museum, place of worships, ...
4 #=====
5     if(t>186) {           # date: 04/07/2020 more shops/pubs open
6         c <-6
7         }
8 #=====
9 # Reopening of schools from September 2020
10 #=====
11     if(t>244) {         # date: 01/09/2020 more shops/pubs re-opening
12         c <-7
13         }
14 #=====
15 # 2nd national restrictions
16 #=====
17     if(t>309) {         # Date: 05/11/2020 localised control measures
18         c <-8
19         }
20 #=====
21 # Lifting national restrictions
22 #=====
23     if(t>336) {         # Date: 02/12/2020 Lifting national restrictions
24         c <-9
25         }
26 #=====
27 # National lockdown restrictions
28 #=====
29     if(t>370) {         # Date: 05/01/2021 National restrictions
30         c <-10
31         }
32 #=====
33 # Partial lifting national lockdown restrictions
34 #=====
35     if(t>432) {         # t=440: 15/03/2021; partially lifting national restrictions
36         c <-11
37         }
38     if(t>505) {         # t=506: 20/05/2021
39         c <-12
40         }
41 #=====
42 # Return to normal from back.tim
43 #=====
44     if(back.nom==1) {
45         if(t>(back.tim-1)) {
46             c <-13
47         }
48     }
49
50 #### Get data from dataframe "inPar"
51 # % home quarantine among symptomatic cases
52
53     for(a in 1:6)      { # age 0-49
54         rFsq[t,a] <- inParam[1,c]
55     }
56     for(a in 7:8)    { # age 50-69
57         rFsq[t,a] <- inParam[2,c]
58     }
59     for(a in 9:10)  { # age 70+
60         rFsq[t,a] <- inParam[3,c]
61     }
62
63 #=====
64 # Transition parameters for E-I0-TM/S-QM/S-RE
65 # gamma distribution mean and shape
66 #=====
67
68     alp1.m <- inParam[4,c]   # gamma mean -days incupation non-infectious period
69     alp1.s <- inParam[5,c]   # gamma sd
70     alp2.m <- inParam[6,c]   # gamma mean -infectiou duration before symptomatic
71     alp2.s <- inParam[7,c]   # gamma sd

```

```

1
2
3     gm0.m[t] <-inParam[8,c]   # mean days infectious period- no quarantine -mild
4     gm0.s[t] <-inParam[9,c]   # gamma sd
5
6     gs0.m[t] <-inParam[10,c]  # mean duration of infectious no quarantine -severe
7     gs0.s[t] <-inParam[11,c]  # gamma sd
8
9     gs1.m[t] <-inParam[12,c]  # mean days of infectious before quarantine -severe
10    gs1.s[t] <-inParam[13,c]  # gamma sd
11    gs2.m[t] <-inParam[14,c]  # mean duration from quarantine to recovery -severe
12    gs2.s[t] <-inParam[15,c]  # gamma sd
13
14    gh1.m[t] <-inParam[16,c]  # mean days before hospitalisation -severe
15    gh1.s[t] <-inParam[17,c]  # gamma sd
16    gh2.m[t] <-inParam[18,c]  # mean days of non-ICU hospitalisation -severe
17    gh2.s[t] <-inParam[19,c]  # gamma sd
18
19    #-----
20    # adjCNT=1, no change; adjCNT<1, reduced contacts
21    #-----
22    for(a in 1:3) { # Age 0-19 children
23      adjCNTa[t,a] <- inParam[20,c]
24    }
25    for(a in 4:7) { # Age 20-59
26      adjCNTa[t,a] <- inParam[21,c]
27    }
28    for(a in 8:8) { # Age 60-69
29      adjCNTa[t,a] <- inParam[22,c]
30    }
31    for(a in 9:10) { # Age 70+
32      adjCNTa[t,a] <- inParam[23,c]
33    }
34    } ## End tt for input parameters
35
36    #-----
37    # Hospitalisation rate by age grp based on Verity et al.
38    for(t in 1:tt) {
39      for(a in 1:10) {
40        rFhos[t,a] <-(rHosp[a]/(1-rFm[a])) *adjHsp[t]
41      }
42    }
43
44    #-----
45    # Calculating transition rate by days since exposed, infected, ...
46    # cumulative (pgamma) from 1 to dd: eventually all will be transfered to next status ....
47    #-----
48    for(d in 1:dd) {
49      cum_alp1[d] <- pgamma(d, (alp1.m/alp1.s)^2, scale=(alp1.s^2)/alp1.m, log=FALSE)
50      cum_alp2[d] <- pgamma(d, (alp2.m/alp2.s)^2, scale=(alp2.s^2)/alp2.m, log=FALSE)
51      cum_gdth.inf[d] <- pgamma(d, (gdth.m/gdth.s)^2, scale=(gdth.s^2)/gdth.m, log=FALSE)
52    }
53
54    # Translating cumulative probability to transition rate by d
55    alp1[1] <- cum_alp1[1]
56    alp2[1] <- cum_alp2[1]
57    gdth.inf[1] <- cum_gdth.inf[1]
58    for(d in 2:dd) {
59      if(cum_alp1[d-1]<1) {
60        alp1[d] <- (cum_alp1[d]-cum_alp1[d-1])/(1-cum_alp1[d-1])
61      } else { alp1[d] <-1 }
62
63      if(cum_alp2[d-1]<1) {
64        alp2[d] <- (cum_alp2[d]-cum_alp2[d-1])/(1-cum_alp2[d-1])
65      } else { alp2[d] <-1 }
66
67      if(cum_gdth.inf[d-1]<1) {
68        gdth.inf[d] <- (cum_gdth.inf[d]-cum_gdth.inf[d-1])/(1-cum_gdth.inf[d-1])
69      } else { gdth.inf[d]<-1 }
70    }
71  }

```



```

1
2
3     for(t in ts:tt)      {           # start t in 1:tt
4
5     for(d in 1:dd)      {           # start d in 1:dd
6     cum_gam.m0[t,d] <- pgamma(d, (gm0.m[t]/gm0.s[t])^2, scale=gm0.s[t]^2/gm0.m[t], log=FALSE)
7
8     cum_gam.s0[t,d] <- pgamma(d, (gs0.m[t]/gs0.s[t])^2, scale=gs0.s[t]^2/gs0.m[t], log=FALSE)
9     cum_gam.s1[t,d] <- pgamma(d, (gs1.m[t]/gs1.s[t])^2, scale=gs1.s[t]^2/gs1.m[t], log=FALSE)
10    cum_gam.s2[t,d] <- pgamma(d, (gs2.m[t]/gs2.s[t])^2, scale=gs2.s[t]^2/gs2.m[t], log=FALSE)
11
12    cum_gam.h1[t,d] <- pgamma(d, (gh1.m[t]/gh1.s[t])^2, scale=gh1.s[t]^2/gh1.m[t], log=FALSE)
13    cum_gam.h2[t,d] <- pgamma(d, (gh2.m[t]/gh2.s[t])^2, scale=gh2.s[t]^2/gh2.m[t], log=FALSE)
14    } # end d in 1:dd
15
16    gam.m0[t,1] <- cum_gam.m0[t,1]; gam.s0[t,1] <- cum_gam.s0[t,1]; gam.s1[t,1] <- cum_gam.s1[t,1]
17    gam.s2[t,1] <- cum_gam.s2[t,1]; gam.h1[t,1] <- cum_gam.h1[t,1]; gam.h2[t,1] <- cum_gam.h2[t,1]
18
19    for(d in 2:dd)      {           # start d in 2:dd
20
21        if(cum_gam.m0[t,d-1]<1) {
22            gam.m0[t,d] <- (cum_gam.m0[t,d]-cum_gam.m0[t,d-1])/(1-cum_gam.m0[t,d-1])
23        } else { gam.m0[t,d]<-1 }
24
25        if(cum_gam.s0[t,d-1]<1) {
26            gam.s0[t,d] <- (cum_gam.s0[t,d]-cum_gam.s0[t,d-1])/(1-cum_gam.s0[t,d-1])
27        } else { gam.s0[t,d]<-1 }
28
29        if(cum_gam.s1[t,d-1]<1) {
30            gam.s1[t,d] <- (cum_gam.s1[t,d]-cum_gam.s1[t,d-1])/(1-cum_gam.s1[t,d-1])
31        } else { gam.s1[t,d]<-1 }
32
33        if(cum_gam.s2[t,d-1]<1) {
34            gam.s2[t,d] <- (cum_gam.s2[t,d]-cum_gam.s2[t,d-1])/(1-cum_gam.s2[t,d-1])
35        } else { gam.s2[t,d]<-1 }
36
37        if(cum_gam.h1[t,d-1]<1) {
38            gam.h1[t,d] <- (cum_gam.h1[t,d]-cum_gam.h1[t,d-1])/(1-cum_gam.h1[t,d-1])
39        } else { gam.h1[t,d]<-1 }
40
41        if(cum_gam.h2[t,d-1]<1) {
42            gam.h2[t,d] <- (cum_gam.h2[t,d]-cum_gam.h2[t,d-1])/(1-cum_gam.h2[t,d-1])
43        } else { gam.h2[t,d]<-1 }
44    } # end d in 2:dd
45
46    #-----
47    # Average transition rates for estimating Rt.
48    # Average transition rates were estimated by exponential distribution,
49    #-----
50
51    alp2.a <- (1/alp2.m)/1.337           # gamma m=1.5
52    gam.m0a[t] <- (1/gm0.m[t])/1.11     # gamma m=5
53    gam.s0a[t] <- (1/gs0.m[t])/1.11     # gamma m=5
54    gam.s1a[t] <- (1/gs1.m[t])/1.25     # gamma m=2
55    gam.s2a[t] <- (1/gs2.m[t])/1.125    # gamma m=4
56    gam.h1a[t] <- (1/gh1.m[t])/1.25     # gamma m=2
57    } # end t in 1:tt
58
59    #-----
60    # Distribution of immunity duration:
61    for(w in 1:tw0) { # start w in 1:tw
62    cum_gimm.wan[w] <- pgamma(w, (gwan.m/gwan.s)^2, scale=gwan.s^2/gwan.m, log=FALSE)
63    } # end w in 1:tw
64
65    gimm.wan[1] <- cum_gimm.wan[1]
66
67    for(w in 2:tw0) {
68        if(cum_gimm.wan[w-1]<1) {
69            gimm.wan[w] <- (cum_gimm.wan[w]-cum_gimm.wan[w-1])/(1-cum_gimm.wan[w-1])
70        } else { gimm.wan[w]<-1 }
71    }
72
73    if(pIM==1) { # If permanent immunity -gimm.wan=0
74    for(w in 1:tw0) {
75        gimm.wan[w] <- 0.0
76    }
77    } # end if pIM=1

```

```

1
2
3 # Distribution of vaccine immunity duration:
4     for(w in 1:tw0) { # start w in 1:tw
5         cum_gimmv.wan[w] <- pgamma(w, (gwanv.m/gwanv.s)^2, scale=gwanv.s^2/gwanv.m, log=FALSE)
6     } # end w in 1:tw
7
8     gimmv.wan[1] <- cum_gimmv.wan[1]
9
10    for(w in 2:tw0) {
11        if(cum_gimmv.wan[w-1]<1) {
12            gimmv.wan[w] <- (cum_gimmv.wan[w]-cum_gimmv.wan[w-1])/(1-cum_gimmv.wan[w-1])
13        } else { gimmv.wan[w] <- 1 }
14    }
15
16    if(pIMv==1) { # If permanent vaccine immunity -gimm.wan=0
17        for(w in 1:tw0) {
18            gimmv.wan[w] <- 0.0
19        } # end if pIMv=1
20    }
21
22    ## =====
23    ## Simulation of covid-19 epidemic
24    ## =====
25    for(t in 2:tt) { ##### Start simulation
26    # =====
27    # Seasonality adjustment of beta[t]
28
29    if(t>639) { # From Sept 2021
30        beta[t]<- bta.nom
31        if(t.dr >240) { # from about Sept
32            if(t.dr <301) { # to about Oct
33                beta[t]<- bta.nom *rWinter1 # beta increased by rWinter
34            }
35        }
36        if(t.dr >300) { # from Nov to Dec
37            beta[t]<- bta.nom *rWinter2 # beta increased by rWinter
38        }
39        if(t.dr <60) { # From Jan to Feb
40            beta[t]<- bta.nom *rWinter2 # beta increased by rWinter
41        }
42        if(t.dr >59) { # from Mar
43            if(t.dr <120) { # to about Apr
44                beta[t]<- bta.nom *rWinter1 # beta increased by rWinter
45            }
46        }
47        } # end t>639
48
49    # =====
50    # Days of the year for non-covid death rate
51    # =====
52    if(t==2) { t.dr <- 1 } # start year 1
53    if(t==368) { t.dr <- 1 } # start year 2
54    if(t==733) { t.dr <- 1 } # start year 3
55    if(t==1098) { t.dr <- 1 } # start year 4
56    if(t==1463) { t.dr <- 1 } # start year 5
57    if(t==1828) { t.dr <- 1 } # start year 6
58    if(t==2193) { t.dr <- 1 } # start year 7
59    if(t==2558) { t.dr <- 1 } # start year 8
60    if(t==2923) { t.dr <- 1 } # start year 9
61    if(t==3288) { t.dr <- 1 } # start year 10
62
63    # =====
64    # First running through t from 1 to ts a period of no covid epidemic
65
66    if(t<ts) { ##### The susceptible from t=1 to t=ts
67        for(a in 1:10) {
68            for(s in 1:2) {
69                N[t,s,a] <- N[t-1,s,a]*(1-rADth0[t.dr,s,a]) +dBth[a]*Bsex[s]; SU[t,s,a] <- N[t,s,a]
70            }
71        }
72    }

```

```

1
2         } }
3     } ##### end if t<ts
4
5 #=====
6 # Simulating from ts to tt for covid epidemic
7 #=====
8     if(t==ts) {
9         eSeed[ts,3,1,5] <- seeds
10        for(a in 1:10) {
11            for(s in 1:2) {
12                for(m in 1:2) {
13                    N[t,s,a] <-N[t-1,s,a]*(1-rADth0[t.dr,s,a]) +dBth[a]*Bsex[s]; SU[t,s,a] <-N[t,s,a]
14                    for(d in 1:10) {
15                        Seed.all[t,s,a] <-Seed.all[t,s,a] +eSeed[t,d,s,a]
16                    }
17                } }
18            } # end if t==ts
19
20 #=====
21 if(t>ts) { ##### start simulating covid epidemic
22
23 # Seeding exposed per day from 15/01/2020 to 29/02/2020 (t=60)
24 if(t<40) { eSeed[t,3,1,5] <- eSeed[t-1,3,1,5] +1 }
25
26 for(a in 1:10) {
27     for(s in 1:2) {
28     for(d in 1:10) {
29     Seed.all[t,s,a] <-Seed.all[t,s,a] +eSeed[t,d,s,a]
30     }
31     }
32     }
33
34 #=====
35 # Average rFm & rFhos for estimating R0/Rt: weighted by age specific proportion of relevant cases
36
37 for(a in 1:10) {
38     rFsq.al[t-1] <- rFsq.al[t-1]+ rFsq[t-1,a]*N[t-1,3,a]/N[t-1,3,11]
39     rFm.al[t-1] <- rFm.al[t-1] + rFm[a]*N[t-1,3,a]/N[t-1,3,11]
40     rFhos.al[t-1] <-rFhos.al[t-1] +rFhos[t-1,a]*N[t-1,3,a]/N[t-1,3,11]
41     } # end a in 1:10
42
43 #=====
44 # Overall infectious individuals in the population
45
46 for(a in 1:10) {
47     for(s in 1:2) {
48     I.i0[t-1,a] <-I.i0[t-1,a] +I0[t-1,s,a] # pre-clinical infectious
49     I.i0v[t-1,a] <-I.i0v[t-1,a] +I0v1[t-1,s,a] +I0v2[t-1,s,a]
50     I.m0[t-1,a] <- I.m0[t-1,a] +IM0[t-1,s,a]
51     I.m[t-1,a] <- I.m[t-1,a] +IM0[t-1,s,a] +I0[t-1,s,a]*rFm[a] # All asymptomatic/mild cases
52     I.m0v[t-1,a] <-I.m0v[t-1,a] + IM0v[t-1,s,a]
53     I.mv[t-1,a] <- I.mv[t-1,a] + IM0v[t-1,s,a] +
54         I0v1[t-1,s,a]*(1-(1-rVEsym1)*(1-rFm[a])) +
55         I0v2[t-1,s,a]*(1-(1-rVEsym2)*(1-rFm[a])) # Among asym/mild: vaccinated and
56         # after immunity waning in the recovered
57     I.sq[t-1,a] <-I.sq[t-1,a] +QS[t-1,s,a]
58     I.sqv[t-1,a] <-I.sqv[t-1,a] +QSV[t-1,s,a]
59     I.s0[t-1,a] <-I.s0[t-1,a] +IS0[t-1,s,a]+ISq[t-1,s,a]+ISh[t-1,s,a]
60     I.s[t-1,a] <- I.s[t-1,a] +IS0[t-1,s,a]+ISq[t-1,s,a]+ISh[t-1,s,a] +I0[t-1,s,a]*(1-rFm[a])
61
62     I.s0v[t-1,a] <-I.s0v[t-1,a] +IS0v[t-1,s,a]+ISqv[t-1,s,a]+IShv[t-1,s,a]
63     I.sv[t-1,a] <- I.sv[t-1,a] +IS0v[t-1,s,a]+ISqv[t-1,s,a]+IShv[t-1,s,a] +
64         I0v1[t-1,s,a] *(1-rVEsym1)*(1-rFm[a]) +
65         I0v2[t-1,s,a] *(1-rVEsym2)*(1-rFm[a])
66     }
67     }
68
69 #=====
70 # Estimating average no. of daily transmission per infectious individuals for estimating R0/Rt

```

```

1
2   for(a in 1:10)      {
3   for(j in 1:10)      {
4   #-----
5       Ii0 <-(-I.i0[t-1,j]+I.i0v[t-1,j])
6           if(Ii0>0) {
7               rIi0 <-(-I.i0[t-1,j]+I.i0v[t-1,j]*InfI2)/(I.i0[t-1,j]+I.i0v[t-1,j])
8           } else { rIi0 <-1 }
9   beta2.i0[t-1] <-beta2.i0[t-1] +(beta[t-1]*CMTa[a,j]*adjCNTa[t-1,a]*
10              N[t-1,3,j]/N[t-1,3,11]) *(rFm[a]*ASYinf +(1-rFm[a])) *rIi0
11   #-----
12       Im0 <-(-I.m0[t-1,j]+I.m0v[t-1,j])
13           if(Im0>0){
14               rIm0 <-(-I.m0[t-1,j]+I.m0v[t-1,j]*InfI2)/(I.m0[t-1,j]+I.m0v[t-1,j])
15           } else { rIm0 <-1 }
16   beta2.m0[t-1] <-beta2.m0[t-1] +(beta[t-1]*CMTa[a,j]*adjCNTa[t-1,a]*
17              N[t-1,3,j]/N[t-1,3,11]) *ASYinf      * rIm0
18   #-----
19       Is0 <-(-I.s0[t-1,j]+I.s0v[t-1,j])
20           if(Is0>0) {
21               rIs0 <-(-I.s0[t-1,j]+I.s0v[t-1,j]*InfI2)/(I.s0[t-1,j]+I.s0v[t-1,j])
22           } else { rIs0 <-1 }
23   beta2.s0[t-1] <-beta2.s0[t-1] +(beta[t-1]*CMTa[a,j]*adjCNTa[t-1,a]*
24              N[t-1,3,j]/N[t-1,3,11]) * rIs0
25   #-----
26       Isq <-(-I.sq[t-1,j]+I.sqv[t-1,j])
27           if(Isq>0) {
28               rIsq <-(-I.sq[t-1,j]+I.sqv[t-1,j]*InfI2)/(I.sq[t-1,j]+I.sqv[t-1,j])
29           } else { rIsq <-1 }
30   beta2.sq[t-1] <-beta2.sq[t-1] +(beta[t-1]*CMTh[a,j]*
31              N[t-1,3,j]/N[t-1,3,11]) * rIsq
32   }
33   }
34   #-----
35   # transition rate from I0 to IM0, etc.
36   #-----
37   dk[t-1,1] <-alp2.a* rFm.al[t-1] # To IM0
38   dk[t-1,2] <-alp2.a*(1-rFm.al[t-1])*(1-rFhos.al[t-1])*(1-rFsq.al[t-1]) # To IS0
39   dk[t-1,3] <-alp2.a*(1-rFm.al[t-1])*(1-rFhos.al[t-1])* rFsq.al[t-1] # To ISq
40   dk[t-1,4] <-alp2.a*(1-rFm.al[t-1])* rFhos.al[t-1] # To ISh
41
42   for(k in 1:4) { dA[t-1] <-dA[t-1] +dk[t-1,k] }
43
44   dk[t-1,5] <-alp2.a*(1-(1-rVEsym1)*(1-rFm.al[t-1])) # To IM0v
45   dk[t-1,6] <-alp2.a*(1-rVEsym1)*(1-rFm.al[t-1])*(1-rFhos.al[t-1])*(1-rFsq.al[t-1]) # To IS0v
46   dk[t-1,7] <-alp2.a*(1-rVEsym1)*(1-rFm.al[t-1])*(1-rFhos.al[t-1])* rFsq.al[t-1] # To ISqv
47   dk[t-1,8] <-alp2.a*(1-rVEsym1)*(1-rFm.al[t-1])* rFhos.al[t-1] # To IShv
48
49   for(k in 5:8) { dAv1[t-1] <-dAv1[t-1] +dk[t-1,k] }
50
51   dk[t-1,9] <-alp2.a*(1-(1-rVEsym2)*(1-rFm.al[t-1])) # To IM0v
52   dk[t-1,10] <-alp2.a*(1-rVEsym2)*(1-rFm.al[t-1])*(1-rFhos.al[t-1])*(1-rFsq.al[t-1]) # To IS0v
53   dk[t-1,11] <-alp2.a*(1-rVEsym2)*(1-rFm.al[t-1])*(1-rFhos.al[t-1])* rFsq.al[t-1] # To ISqv
54   dk[t-1,12] <-alp2.a*(1-rVEsym2)*(1-rFm.al[t-1])* rFhos.al[t-1] # To IShv
55
56   for(k in 9:12) { dAv2[t-1] <-dAv2[t-1] +dk[t-1,k] }
57
58   #=====
59   # Estimating R0 and effective Rt
60   #-----
61
62   Rt[t-1] <- ((SU[t-1,3,11]+VA0[t-1,3,11])/N[t-1,3,11]) *
63       (beta2.i0[t-1] /((dA[t-1]) +
64       beta2.m0[t-1]*dk[t-1,1] /((dA[t-1]*gam.m0a[t-1]) +
65       beta2.s0[t-1]*dk[t-1,2] /((dA[t-1]*gam.s0a[t-1]) +
66       beta2.s0[t-1]*dk[t-1,3] /((dA[t-1]*gam.s1a[t-1]) +
67       beta2.sq[t-1]*dk[t-1,3]*gam.s1a[t-1] /((dA[t-1]*gam.s2a[t-1]) +
68       beta2.s0[t-1]*dk[t-1,4] /((dA[t-1]*gam.h1a[t-1])) +
69       (VAef1[t-1,3,11]/N[t-1,3,11])*(1-rVEinf1) *
70       (beta2.i0[t-1] /((dAv1[t-1]) +

```

```

1
2      beta2.m0[t-1]*dk[t-1,5]      /(dAv1[t-1]*gam.m0a[t-1]) +
3      beta2.s0[t-1]*dk[t-1,6]      /(dAv1[t-1]*gam.s0a[t-1]) +
4      beta2.s0[t-1]*dk[t-1,7]      /(dAv1[t-1]*gam.s1a[t-1]) +
5      beta2.sq[t-1]*dk[t-1,7]*gam.s1a[t-1]/(dAv1[t-1]*gam.s2a[t-1]) +
6      beta2.s0[t-1]*dk[t-1,8]      /(dAv1[t-1]*gam.h1a[t-1]) +
7      (VAef2[t-1,3,11]/N[t-1,3,11])*(1-rVEinf2) *
8      (beta2.i0[t-1]                /(dAv2[t-1])                +
9      beta2.m0[t-1]*dk[t-1,9]      /(dAv2[t-1]*gam.m0a[t-1]) +
10     beta2.s0[t-1]*dk[t-1,10]     /(dAv2[t-1]*gam.s0a[t-1]) +
11     beta2.s0[t-1]*dk[t-1,11]     /(dAv2[t-1]*gam.s1a[t-1]) +
12     beta2.sq[t-1]*dk[t-1,11]*gam.s1a[t-1]/(dAv2[t-1]*gam.s2a[t-1]) +
13     beta2.s0[t-1]*dk[t-1,12]     /(dAv2[t-1]*gam.h1a[t-1]) +
14     ((SU.vac[t-1,3,11] +SU.rec[t-1,3,11])/N[t-1,3,11]) *
15     (beta2.i0[t-1]                /(dAv2[t-1])                +
16     beta2.m0[t-1]*dk[t-1,9]      /(dAv2[t-1]*gam.m0a[t-1]) +
17     beta2.s0[t-1]*dk[t-1,10]     /(dAv2[t-1]*gam.s0a[t-1]) +
18     beta2.s0[t-1]*dk[t-1,11]     /(dAv2[t-1]*gam.s1a[t-1]) +
19     beta2.sq[t-1]*dk[t-1,11]*gam.s1a[t-1]/(dAv2[t-1]*gam.s2a[t-1]) +
20     beta2.s0[t-1]*dk[t-1,12]     /(dAv2[t-1]*gam.h1a[t-1]))
21
22 #=====
23 # Susceptible infected by contacting infectious individuals with any age-sex
24 # not quarantined or household isolated in the whole population
25 #-----
26
27     for(s in 1:2)      {
28     for(a in 1:10)    {
29     for(j in 1:10)    {
30
31 # Temporary variable:
32     ConInf <- CMTa[a,j]*adjCNTa[t-1,a] *
33     (ASYinf *(I.m[t-1,j] +InfI2 *I.mv[t-1,j]) +I.s[t-1,j] +InfI2 *I.sv[t-1,j])/N[t-1,3,j] +
34     CMTh[a,j] * (I.sq[t-1,j] +InfI2 *I.sqv[t-1,j])/N[t-1,3,j]
35
36 # Exposed from susceptible
37     New.expsu[t-1,s,a] <-New.expsu[t-1,s,a] + beta[t-1] *SU[t-1,s,a] *ConInf
38     } # end age j
39     SU[t-1,s,a] <- SU[t-1,s,a] -New.expsu[t-1,s,a]
40     }
41     }
42
43 #-----
44     for(s in 1:2)      {
45     for(v in 1:dv0)    {
46     for(a in 1:10)    {
47     for(j in 1:10)    {
48
49 # Temporary variable:
50     ConInf <- CMTa[a,j]*adjCNTa[t-1,a] *
51     (ASYinf *(I.m[t-1,j] +InfI2 *I.mv[t-1,j]) +I.s[t-1,j] +InfI2 *I.sv[t-1,j])/N[t-1,3,j] +
52     CMTh[a,j] * (I.sq[t-1,j] +InfI2 *I.sqv[t-1,j])/N[t-1,3,j]
53
54 # Exposed in early vaccinated (<14 days):
55     Expv0.temp <- beta[t-1] *eVA0[t-1,v,s,a] *ConInf
56     Expv0[t-1,v,s,a] <- Expv0[t-1,v,s,a] +Expv0.temp
57     eVA0[t-1,v,s,a] <- eVA0[t-1,v,s,a] -Expv0.temp
58     }
59     New.expv0[t-1,s,a] <-New.expv0[t-1,s,a] +Expv0[t-1,v,s,a]
60     }
61     }
62     }
63
64 #-----
65     for(s in 1:2)      {
66     for(w in 1:tv0)    {
67     for(a in 1:10)    {
68     for(j in 1:10)    {
69
70 # Temporary variable:

```

```

1
2     ConInf <- CMTa[a,j]*adjCNTa[t-1,a] *
3       (ASYinf *(I.m[t-1,j] +InfI2 *I.mv[t-1,j]) +I.s[t-1,j] +InfI2 *I.sv[t-1,j])/N[t-1,3,j] +
4       CMTh[a,j]* (I.sq[t-1,j] +InfI2 *I.sqv[t-1,j])/N[t-1,3,j]
5
6 # Exposed in vaccinated dose-1 (risk reduced by "1-rVEinf1"):
7     Expv1.temp <- beta[t-1] *eVAef1[t-1,w,s,a] *ConInf *(1-rVEinf1)
8     Expv1[t-1,w,s,a] <-Expv1[t-1,w,s,a] + Expv1.temp
9     eVAef1[t-1,w,s,a] <- eVAef1[t-1,w,s,a] -Expv1.temp
10    }
11    New.expv1[t-1,s,a] <-New.expv1[t-1,s,a] +Expv1[t-1,w,s,a]
12    }
13
14 #-----
15     for(s in 1:2)      {
16       tv1<-(t-vac.tim[1]); if(tv1<2) { tv1<-2 }
17       for(w in 1:tv1) {
18         for(a in 1:10) {
19           for(j in 1:10) {
20
21 # Temporary variable:
22     ConInf <- CMTa[a,j]*adjCNTa[t-1,a] *
23       (ASYinf *(I.m[t-1,j] +InfI2 *I.mv[t-1,j]) +I.s[t-1,j] +InfI2 *I.sv[t-1,j])/N[t-1,3,j] +
24       CMTh[a,j]* (I.sq[t-1,j] +InfI2 *I.sqv[t-1,j])/N[t-1,3,j]
25
26 # Exposed in vaccinated dose-2 (risk reduced by "1-rVEinf2"):
27     Expv2.temp <- beta[t-1] *eVAef2[t-1,w,s,a] *ConInf *(1-rVEinf2)
28     Expv2[t-1,w,s,a] <-Expv2[t-1,w,s,a] + Expv2.temp
29     eVAef2[t-1,w,s,a] <- eVAef2[t-1,w,s,a] -Expv2.temp
30     }
31     New.expv2[t-1,s,a] <-New.expv2[t-1,s,a] +Expv2[t-1,w,s,a]
32     }
33
34 #-----
35     for(s in 1:2)      {
36       for(a in 1:10)   {
37         for(j in 1:10) {
38
39 # Temporary variable:
40     ConInf <- CMTa[a,j]*adjCNTa[t-1,a] *
41       (ASYinf *(I.m[t-1,j] +InfI2 *I.mv[t-1,j]) +I.s[t-1,j] +InfI2 *I.sv[t-1,j])/N[t-1,3,j] +
42       CMTh[a,j]* (I.sq[t-1,j] +InfI2 *I.sqv[t-1,j])/N[t-1,3,j]
43
44 # Exposed due to loss of immunity in vaccinated/recovered (risk fraction: "rLOSinf"):
45     New.explosv1[t-1,s,a] <- New.explosv1[t-1,s,a] + beta[t-1] *(SU.vac[t-1,s,a]) *ConInf
46     New.explosrec[t-1,s,a] <- New.explosrec[t-1,s,a] + beta[t-1] *(SU.rec[t-1,s,a]) *ConInf
47     }
48
49     SU.vac[t-1,s,a] <-SU.vac[t-1,s,a] - New.explosv1[t-1,s,a]
50     SU.rec[t-1,s,a] <-SU.rec[t-1,s,a] -New.explosrec[t-1,s,a]
51     }
52
53 #####
54     if(VAC==1)      {      ### Vaccination yes=1 or no=0
55
56 #=====
57 # Total vaccinated and days required to complete vaccination
58 if(t <vac.tim[1]+1 ) { Vtru<-0; Vp<-7; Rv<-0 } # Vtru: vaccination true-1 or false-0
59 for(rev in 1:nRvac)      {      # from 1 to nRvac -no. of vac programs
60 if(t== (vac.tim[rev]+1))      {
61     Vtru <-1; Vp <-1; Rv <-rev
62     T.vac[Rv,1] <- vac.tim[rev] +1      # T.vac starting time for age Vp==1
63   }

```

```

1
2                                     } # end for rev in 1:nRvac
3 =====
4     if( Vtru==1)      {
5
6     #-----
7     for(nVp in 2:6)   {
8     if(t==T.vac[Rv,nVp]) { Vp <-nVp }
9     }
10    #-----
11    Totalvac <-0
12    #-----
13    vaccrg <-vac.crg4          # if Vp<4: age 50+
14
15    if(Vp==6)      {
16    if(Rv==1) { vaccrg <-vac.crg1*0.4 } # 16-19 in 10-19
17    if(Rv >1) { vaccrg <-vac.crg1*0.1 } # new 16 in 10-19
18    } # end if Vp=6
19
20    if(Vp==5)      {
21    vaccrg <-vac.crg2 # age 20-39
22    } # end if Vp=5
23
24    if(Vp==4)      {
25    vaccrg <-vac.crg3 # age 40-49
26    } # end if Vp=4
27
28    #-----
29    for(a in vagg[Vp,1]:vagg[Vp,2]) { # a from low to high age limit
30    for(s in 1:2) { # s in 1:2
31
32    # Vaccinated among SU, RE, and lost immunity:
33    # In not-exposed only
34
35    Totalvac <-Totalvac + (SU[t-1,s,a] + RE[t-1,s,a] +SU.vac[t-1,s,a] +SU.rec[t-1,s,a] ) *vaccrg
36
37    # vaccination of people vaccinated for at least 91 days (3 months)
38
39    vcrg <- vaccrg
40    if(Vp==6) { vcrg <- vac.crg1 }
41    if(Rv>1) {
42    for(w in 91:t) {
43    Totalvac <- Totalvac + eVAef2[t-1,w,s,a] *vcrg
44    }
45    } # end Rv>1
46    } # end s
47    } # end a
48
49    #-----
50    if( t==T.vac[Rv,Vp] ) { # Fixing V.day, V.dmax, vacend estimates at T.vac[Rv,Vp]
51    V.day[Rv,Vp] <- round(Totalvac/vac.dmaxi) +1 # V.day: no. of days required for Vp phase
52    V.dmax[Rv,Vp] <-Totalvac/V.day[Rv,Vp] # Totalvac at the 1st day of a vac phase
53    vacend[Rv,Vp] <- T.vac[Rv,Vp] +V.day[Rv,Vp] -1
54    if(Vp<6) { T.vac[Rv,Vp+1] <-vacend[Rv,Vp] +1 }
55    } # end if t==T.vac
56    #-----
57
58    } # end if Vtru==1
59    } # end if VAC==1
60
61 =====
62 # Estimating VA, SU, EX, I, and RE, hospitalised, ICU, and no. of tests required
63
64 for(s in 1:2) { ### sex male-1, female-2
65 for(a in 1:10) { ### age group 1-10
66
67     if(VAC==1) { # Vaccination: 1=yes or 0-no

```

```

1
2     if(Vtru==1)      {
3     if(Vp<(vac.AGP[Rv]+1)) { # only apply to Vp 1-6
#-----
4         vaccrg <-vac.crg4          # if Vp<4: age 50+
5
6         if(Vp==6)      {
7         if(Rv==1) { vaccrg <-vac.crg1*0.4 } # 18-19 in 10-19
8         if(Rv >1) { vaccrg <-vac.crg1*0.1 } # new 16 in 10-19
9         } # end if Vp=6
10        if(Vp==5)      {
11        vaccrg <-vac.crg2 # age 20-39
12        } # end if Vp=5
13        if(Vp==4)      {
14        vaccrg <-vac.crg3 # age 40-49
15        } # end if Vp=4
#-----
16        if(a>vagp[Vp,1]-1) {
17        if(a<vagp[Vp,2]+1){
18        # Vaccinating susceptible
19        #-----
20        vac.SU[t-1,s,a] <- V.dmax[Rv,Vp] *(SU[t-1,s,a]*vaccrg)/Totalvac
21        if(vac.SU[t-1,s,a]>SU[t-1,s,a]) { vac.SU[t-1,s,a] <-SU[t-1,s,a]*vaccrg }
22        SU[t-1,s,a] <-SU[t-1,s,a] -vac.SU[t-1,s,a]
23        New.vac[t-1,s,a] <- vac.SU[t-1,s,a]
24
25        # Vaccinating loss of immunity in vaccinated
26        #-----
27        vac.SUvac[t-1,s,a] <- V.dmax[Rv,Vp] *(SU.vac[t-1,s,a]*vaccrg)/Totalvac
28        if(vac.SUvac[t-1,s,a]>SU.vac[t-1,s,a]) { vac.SUvac[t-1,s,a] <-SU.vac[t-1,s,a]*vaccrg }
29        SU.vac[t-1,s,a] <- SU.vac[t-1,s,a] -vac.SUvac[t-1,s,a]
30
31        New.vac[t-1,s,a] <-New.vac[t-1,s,a] +vac.SUvac[t-1,s,a]
32
33        # Vaccinating loss of immunity in recovered
34        #-----
35        vac.SUrec[t-1,s,a] <- V.dmax[Rv,Vp] *(SU.rec[t-1,s,a]*vaccrg)/Totalvac
36        if(vac.SUrec[t-1,s,a]>SU.rec[t-1,s,a]) { vac.SUrec[t-1,s,a] <-SU.rec[t-1,s,a]*vaccrg }
37        SU.rec[t-1,s,a] <- SU.rec[t-1,s,a] -vac.SUrec[t-1,s,a]
38        New.vac[t-1,s,a] <-New.vac[t-1,s,a] +vac.SUrec[t-1,s,a]
39
40        # Vaccinating all recovered
41        vac.RE<-0
42        for(w in 1:t) {
43        vac.RE <-V.dmax[Rv,Vp] *(eRE[t-1,w,s,a]*vaccrg)/Totalvac
44        if(vac.RE>eRE[t-1,w,s,a]) { vac.RE <-eRE[t-1,w,s,a]*vaccrg }
45        eRE[t-1,w,s,a] <- eRE[t-1,w,s,a] -vac.RE
46        eRE[t,1,s,a] <- eRE[t,1,s,a] +vac.RE *(1-rADth0[t.dr,s,a]) # Boost RE status after vaccination
47        New.vac[t-1,s,a] <- New.vac[t-1,s,a] +vac.RE
48        } # end w in 1:t
49
50        # Re-vaccinating previous vaccinated, if Rv>1
51        #-----
52        if(Rv>1) {
53        vcrgr <- vaccrg
54        if(Vp==6) { vcrgr <- vac.crg1 } # for age 16-19
55        vac.VAef <-0
56        for(w in 91:t) {
57        vac.VAef <-V.dmax[Rv,Vp] *(eVAef2[t-1,w,s,a]*vcrgr)/Totalvac
58        if(vac.VAef>eVAef2[t-1,w,s,a]) { vac.VAef <-eVAef2[t-1,w,s,a]*vcrgr }
59        eVAef2[t-1,w,s,a] <- eVAef2[t-1,w,s,a] -vac.VAef
60        eVAef2[t,1,s,a] <- eVAef2[t,1,s,a] +vac.VAef *(1-rADth0[t.dr,s,a])
61        New.vac[t-1,s,a] <- New.vac[t-1,s,a] +vac.VAef
62        } # end w in 91:t
63        } # End if Rv>1
64
65        #-----
66        } # end a>a1-1
67        } # end a<a2+1

```



```

1
2   if( Vp==vac.AGP[Rv] ) {
3     if(t==vacend[Rv,Vp]+1) { Vtru <-0 }
4     }
5     } # end if Vp<7
6     } # end if Vtru==1

```

```

7 #=====

```

```

8 # Calculating no. of VA status at time t

```

```

9
10  eVA0[t,1,s,a] <- vac.SU[t-1,s,a] *(1-rADth0[t.dr,s,a])
11  VA0[t,s,a] <-eVA0[t,1,s,a]
12  for(v in 2:14) {
13    eVA0[t,v,s,a] <-eVA0[t-1,v-1,s,a] *(1-rADth0[t.dr,s,a])
14    VA0[t,s,a] <-VA0[t,s,a] +eVA0[t,v,s,a]
15    } # end for v in 2:14

```

```

16 #-----
17  eVAef1[t,1,s,a] <-eVA0[t-1,14,s,a]*(1-rADth0[t.dr,s,a])
18  VAef1[t,s,a] <- eVAef1[t,1,s,a]
19  for(w in 2:63) {
20    eVAef1[t,w,s,a] <-eVAef1[t-1,w-1,s,a]*(1-rADth0[t.dr,s,a])
21    VAef1[t,s,a] <-VAef1[t,s,a] +eVAef1[t,w,s,a]
22    }

```

```

23 #-----
24 # eVAef2 include renewed vaccination of previously vaccinated
25 #-----
26  eVAef2[t,1,s,a] <- eVAef2[t,1,s,a] +(eVAef1[t-1,63,s,a] +
27    vac.SUvac[t-1,s,a] +vac.SUrec[t-1,s,a])*(1-rADth0[t.dr,s,a])
28    tv1<-(t-vac.tim[1]); if(tv1<3) { tv1<-3 }
29    for(w in 2:tv1) {
30      eVAef2[t,w,s,a] <- eVAef2[t-1,w-1,s,a] *(1-gimmv.wan[w-1])*(1-rADth0[t.dr,s,a])
31    }
32    for(w in 1:tv1) {
33      VAef2[t,s,a] <-VAef2[t,s,a] +eVAef2[t,w,s,a]
34    }
35    } ### end if VAC==1

```

```

36 #=====
37 # Estimating return to susceptible in the recovered/vaccinated, minus newly infected due to loss of immunity
38 #-----

```

```

39  SUvac <-0
40  tv1 <-(t-vac.tim[1]); if(tv1<2) { tv1<-2 } # Loss of vaccine immunity
41  for(w in 1:tv1) {
42    SUvac <- SUvac +eVAef2[t-1,w,s,a] *gimmv.wan[w]
43  }
44  SU.vac[t,s,a] <-(SU.vac[t-1,s,a] +SUvac) *(1-rADth0[t.dr,s,a])
45
46  SUrec <-0
47  tw1 <-(t-ts); if(tw1<2) { tw1<-2 } # Loss of natural immunity
48  for(w in 1:tw1) {
49    SUrec <- SUrec +eRE[t-1,w,s,a] *gimm.wan[w]
50  }
51  SU.rec[t,s,a]<- (SU.rec[t-1,s,a] +SUrec) *(1-rADth0[t.dr,s,a])

```

```

52 #=====

```

```

53 # Estimating SU, EX, I, and RE

```

```

54 # New exposed and vaccinated already removed from SU[t-1, ...]

```

```

55 #-----
56  SU[t,s,a] <-(SU[t-1,s,a])*(1-rADth0[t.dr,s,a]) +
57    dBth[a]*Bsex[s] -Seed.all[t,s,a]
58
59  New.expal[t-1,s,a] <- New.expsu[t-1,s,a] +New.expv0[t-1,s,a] +
60    New.expv1[t-1,s,a] +New.expv2[t-1,s,a] +
61    New.explosv1[t-1,s,a] +New.explosrec[t-1,s,a]

```

```

62 #=====

```

```

63 # All newsymptomatic cases at t. rVESym: efficacy of vaccine on symptomatic cases

```

```

1
2 #-----
3   for(d in 2:dd)      {
4     New.sym[t,s,a] <- New.sym[t,s,a] + (eI0[t-1,d-1,s,a] +
5                                     eI0v1[t-1,d-1,s,a]*(1-rVESym1) +
6                                     eI0v2[t-1,d-1,s,a]*(1-rVESym2) ) *alp2[d-1]*(1-rFm[a])
7   } # end for d in 2:dd
8
9   eEX[t,1,s,a] <- (New.expsu[t-1,s,a] +New.expv0[t-1,s,a]) +eSeed[t,1,s,a]
10
11  eEXv1[t,1,s,a] <-New.expv1[t-1,s,a]
12
13  eEXv2[t,1,s,a] <- (New.expv2[t-1,s,a] +New.explosv1[t-1,s,a] +New.explosrec[t-1,s,a])
14
15  # All covid deaths from symptomatic cases, ie, (1-rFm)
16  #-----
17  eInf[t,1,s,a] <- eEX[t,1,s,a] *(1-rFm[a]) *drisk.inf[s,a]*adjDth[t]
18  eInfv[t,1,s,a] <- (eEXv1[t,1,s,a] *(1-rVESym1)*(1-rFm[a]) +
19                    eEXv2[t,1,s,a] *(1-rVESym2)*(1-rFm[a]) ) *drisk.inf[s,a]*adjDth[t]
20  #-----
21  I0.1 <-0; I0v1.1 <-0; I0v2.1 <-0
22
23  for(d in 2:dd)      { # d in 2:dd=60
24    I0.1 <- I0.1 + eI0[t-1,d-1,s,a]*alp2[d-1]
25    I0v1.1 <-I0v1.1 +eI0v1[t-1,d-1,s,a]*alp2[d-1]
26    I0v2.1 <-I0v2.1 +eI0v2[t-1,d-1,s,a]*alp2[d-1]
27
28    eI0[t,1,s,a] <- eI0[t,1,s,a] + eEX[t-1,d-1,s,a]*alp1[d-1]           # From Exp to I0
29    eI0v1[t,1,s,a] <-eI0v1[t,1,s,a] + eEXv1[t-1,d-1,s,a]*alp1[d-1]       # Exposed in vaccinated dose-1
30    eI0v2[t,1,s,a] <-eI0v2[t,1,s,a] + eEXv2[t-1,d-1,s,a]*alp1[d-1]       # Exposed in vaccinated dose-2
31
32    eQS[t,1,s,a] <- eQS[t,1,s,a] + eISq[t-1,d-1,s,a]*gam.s1[t-1,d-1]
33    eQSV[t,1,s,a] <-eQSV[t,1,s,a] +eISqv[t-1,d-1,s,a]*gam.s1[t-1,d-1]
34    eHS[t,1,s,a] <- eHS[t,1,s,a] + eISh[t-1,d-1,s,a]*gam.h1[t-1,d-1]
35    eHSv[t,1,s,a] <-eHSv[t,1,s,a] +eIShv[t-1,d-1,s,a]*gam.h1[t-1,d-1]
36
37    } # end d in 2:dd
38
39  #-----
40  # Allocate I0.all to IM, IS, etc
41  #-----
42  eIM0[t,1,s,a] <- I0.1 *rFm[a]
43  eIS0[t,1,s,a] <- I0.1 *(1-rFm[a]) *(1-rFhos[t-1,a])*(1-rFsq[t-1,a])
44  eISq[t,1,s,a] <- I0.1 *(1-rFm[a]) *(1-rFhos[t-1,a])* rFsq[t-1,a]
45  eISh[t,1,s,a] <- I0.1 *(1-rFm[a]) * rFhos[t-1,a]
46
47  eIM0v[t,1,s,a] <- I0v1.1* (1-(1-rVESym1)*(1-rFm[a])) +I0v2.1*(1-(1-rVESym2)*(1-rFm[a]))
48  eIS0v[t,1,s,a] <-(I0v1.1* (1-rVESym1)+I0v2.1*(1-rVESym2))*(1-rFm[a])*(1-rFhos[t-1,a])*(1-rFsq[t-1,a])
49  eISqv[t,1,s,a] <-(I0v1.1* (1-rVESym1)+I0v2.1*(1-rVESym2))*(1-rFm[a])*(1-rFhos[t-1,a])* rFsq[t-1,a]
50  eIShv[t,1,s,a] <-(I0v1.1* (1-rVESym1)+I0v2.1*(1-rVESym2))*(1-rFm[a])* rFhos[t-1,a]
51
52  #-----
53  # Estimate covid related deaths by days since exposed/infected
54  # -----
55  for(d in 2:dd+1)  {
56    nDth.inf[t-1,s,a] <- nDth.inf[t-1,s,a] + eInf[t-1,d-1,s,a]*gdth.inf[d-1]
57    nDth.infv[t-1,s,a] <-nDth.infv[t-1,s,a]+eInfv[t-1,d-1,s,a]*gdth.inf[d-1]
58  }
59
60  #-----
61  # UK data: 64% covid-19 deaths in hospital, 36% in other settings
62  if(HS[t-1,s,a]>0) { r.dhos<-nDth.inf[t-1,s,a] *0.64/HS[t-1,s,a] } else { r.dhos<-0 }
63  if(r.dhos>0.9)      { r.dhos<-0.9 }
64
65  for(d in 1:dd)      {
66    nDth.hos[t-1,d,s,a] <- eHS[t-1,d,s,a]*r.dhos
67    if(nDth.hos[t-1,d,s,a]<0) { nDth.hos[t-1,d,s,a]<-0 }
68  }
69
70  for(d in 1:dd)      { # All hospital deaths
71    nDthHos.all[t-1,s,a] <-nDthHos.all[t-1,s,a] +nDth.hos[t-1,d,s,a]

```

```

1
2
3
4     nDth.cov[t-1,s,a] <-nDth.cov[t-1,s,a] +nDthHos.all[t-1,s,a] # sum up covid deaths
5
6 # Deaths outside hospitals in ISO and QS:
7     nDth.ss[t-1,s,a] <- nDth.inf[t-1,s,a] -nDthHos.all[t-1,s,a]
8         if(nDth.ss[t-1,s,a]<0) { nDth.ss[t-1,s,a]<-0 }
9
10    nS0Sq <- ISO[t-1,s,a] +QS[t-1,s,a]           # Temporary variable
11
12    if(nS0Sq>0) { r.dss<-nDth.ss[t-1,s,a]/nS0Sq } else { r.dss<-0 }
13    if(r.dss>1) { r.dss<-0.99 }
14
15    for(d in 1:dd) {
16        nDth.s0[t-1,d,s,a] <-eISO[t-1,d,s,a] *r.dss
17        if(nDth.s0[t-1,d,s,a]<0) { nDth.s0[t-1,d,s,a]<-0 }
18        nDth.sq[t-1,d,s,a] <- eQS[t-1,d,s,a] *r.dss
19        if(nDth.sq[t-1,d,s,a]<0) { nDth.sq[t-1,d,s,a]<-0 }
20
21    nDth.cov[t-1,s,a] <-nDth.cov[t-1,s,a] +nDth.s0[t-1,d,s,a] +nDth.sq[t-1,d,s,a] ## sum up covid deaths
22    }
23
24 #-----
25 # Repeat the above for covid deaths in reinfectd
26 #-----
27
28 if(HSv[t-1,s,a]>0) { r.dhosv<-nDth.infv[t-1,s,a] *0.64/HSv[t-1,s,a] } else { r.dhosv<-0 }
29 if(r.dhosv>0.9) { r.dhosv<-0.9 }
30
31 for(d in 1:dd) {
32     nDth.hosv[t-1,d,s,a] <- eHSv[t-1,d,s,a]*r.dhosv
33     if(nDth.hosv[t-1,d,s,a]<0) { nDth.hosv[t-1,d,s,a]<-0 }
34 }
35
36 for(d in 1:dd) {
37     nDthHos.allv[t-1,s,a] <-nDthHos.allv[t-1,s,a] +nDth.hosv[t-1,d,s,a]
38 }
39
40 nDth.cov[t-1,s,a] <-nDth.cov[t-1,s,a] +nDthHos.allv[t-1,s,a] # sum up covid deaths
41
42 # Deaths outside hospitals in ISO and QS:
43 nDth.ssv[t-1,s,a] <- nDth.infv[t-1,s,a] -nDthHos.allv[t-1,s,a]
44 if(nDth.ssv[t-1,s,a]<0) { nDth.ssv[t-1,s,a]<-0 }
45
46 nS0Sqv <- ISOv[t-1,s,a] +QSV[t-1,s,a]           # Temporary variable
47
48 if(nS0Sqv>0) { r.dssv<-nDth.ssv[t-1,s,a]/nS0Sqv } else { r.dssv<-0 }
49 if(r.dssv>1) { r.dssv<-0.99 }
50
51 for(d in 1:dd) {
52     nDth.s0v[t-1,d,s,a] <-eISOv[t-1,d,s,a] *r.dssv
53     if(nDth.s0v[t-1,d,s,a]<0) { nDth.s0v[t-1,d,s,a]<-0 }
54     nDth.sqv[t-1,d,s,a] <- eQSV[t-1,d,s,a] *r.dssv
55     if(nDth.sqv[t-1,d,s,a]<0) { nDth.sqv[t-1,d,s,a]<-0 }
56
57 nDth.cov[t-1,s,a] <-nDth.cov[t-1,s,a] +nDth.s0v[t-1,d,s,a] +nDth.sqv[t-1,d,s,a] ## sum up covid deaths
58 }
59
60 #-----
61
62 for(d in 2:dd) {
63
64     eEX[t,d,s,a] <- eEX[t-1,d-1,s,a]*(1-alp1[d-1]) +eSeed[t,d,s,a]
65     eEXv1[t,d,s,a] <-eEXv1[t-1,d-1,s,a]*(1-alp1[d-1])
66     eEXv2[t,d,s,a] <-eEXv2[t-1,d-1,s,a]*(1-alp1[d-1])
67
68     eI0[t,d,s,a] <- eI0[t-1,d-1,s,a]*(1-alp2[d-1])
69     eI0v1[t,d,s,a] <-eI0v1[t-1,d-1,s,a]*(1-alp2[d-1])

```

```

1
2     eI0v2[t,d,s,a] <- eI0v2[t-1,d-1,s,a]*(1- $\alpha$ 2[d-1])
3
4     eIM0[t,d,s,a] <- eIM0[t-1,d-1,s,a]*(1-gam.m0[t-1,d-1])
5     eISq[t,d,s,a] <- eISq[t-1,d-1,s,a]*(1-gam.s1[t-1,d-1])
6     eISh[t,d,s,a] <- eISh[t-1,d-1,s,a]*(1-gam.h1[t-1,d-1])
7
8     eIS0[t,d,s,a] <- (eIS0[t-1,d-1,s,a]- nDth.s0[t-1,d-1,s,a])*(1-gam.s0[t-1,d-1])
9     eQS[t,d,s,a] <- (eQS[t-1,d-1,s,a]- nDth.sq[t-1,d-1,s,a])*(1-gam.s2[t-1,d-1])
10    eHS[t,d,s,a] <- (eHS[t-1,d-1,s,a]-nDth.hos[t-1,d-1,s,a])*(1-gam.h2[t-1,d-1])
11
12    eIM0v[t,d,s,a] <- eIM0v[t-1,d-1,s,a]*(1-gam.m0[t-1,d-1])
13    eISqv[t,d,s,a] <- eISqv[t-1,d-1,s,a]*(1-gam.s1[t-1,d-1])
14    eIShv[t,d,s,a] <- eIShv[t-1,d-1,s,a]*(1-gam.h1[t-1,d-1])
15
16    eIS0v[t,d,s,a] <- (eIS0v[t-1,d-1,s,a]- nDth.s0v[t-1,d-1,s,a])*(1-gam.s0[t-1,d-1])
17    eQSV[t,d,s,a] <- (eQSV[t-1,d-1,s,a]- nDth.sqv[t-1,d-1,s,a])*(1-gam.s2[t-1,d-1])
18    eHSv[t,d,s,a] <- (eHSv[t-1,d-1,s,a]-nDth.hosv[t-1,d-1,s,a])*(1-gam.h2[t-1,d-1])
19
20    eInf[t,d,s,a] <- eInf[t-1,d-1,s,a]*(1-gdth.inf[d-1])
21
22    eInfv[t,d,s,a] <- eInfv[t-1,d-1,s,a]*(1-gdth.inf[d-1])
23
24    } # End d in 2:dd
25
26 # =====
27 # Overall EX, IO, IM, IS, etc
28 # =====
29
30     for(d in 1:dd)      { # d in 1:dd
31
32         EX[t,s,a] <- EX[t,s,a] + eEX[t,d,s,a]
33         IO[t,s,a] <- IO[t,s,a] + eIO[t,d,s,a]
34         IM0[t,s,a] <- IM0[t,s,a] + eIM0[t,d,s,a]
35         IS0[t,s,a] <- IS0[t,s,a] + eIS0[t,d,s,a]
36         ISq[t,s,a] <- ISq[t,s,a] + eISq[t,d,s,a]
37         QS[t,s,a] <- QS[t,s,a] + eQS[t,d,s,a]
38         ISh[t,s,a] <- ISh[t,s,a] + eISh[t,d,s,a]
39         HS[t,s,a] <- HS[t,s,a] + eHS[t,d,s,a]
40
41         EXv1[t,s,a] <- EXv1[t,s,a] + eEXv1[t,d,s,a]
42         IOv1[t,s,a] <- IOv1[t,s,a] + eIOv1[t,d,s,a]
43
44         EXv2[t,s,a] <- EXv2[t,s,a] + eEXv2[t,d,s,a]
45         IOv2[t,s,a] <- IOv2[t,s,a] + eIOv2[t,d,s,a]
46
47         IM0v[t,s,a] <- IM0v[t,s,a] + eIM0v[t,d,s,a]
48         IS0v[t,s,a] <- IS0v[t,s,a] + eIS0v[t,d,s,a]
49         ISqv[t,s,a] <- ISqv[t,s,a] + eISqv[t,d,s,a]
50         QSV[t,s,a] <- QSV[t,s,a] + eQSV[t,d,s,a]
51         IShv[t,s,a] <- IShv[t,s,a] + eIShv[t,d,s,a]
52         Hsv[t,s,a] <- Hsv[t,s,a] + eHsv[t,d,s,a]
53
54         } # end for d in 1:dd
55
56         HS.new[t,s,a] <- eHS[t,1,s,a] + eHsv[t,1,s,a]      # New hospital admission
57
58 # =====
59 # Recovered from infected
60 # =====
61
62     for(d in 1:dd)      {
63         eRE[t,1,s,a] <- eRE[t,1,s,a] +
64             (eQS[t-1,d,s,a]- nDth.sq[t-1,d,s,a])*gam.s2[t-1,d] +
65             (eIS0[t-1,d,s,a]- nDth.s0[t-1,d,s,a])*gam.s0[t-1,d] +
66             (eHS[t-1,d,s,a]- nDth.hos[t-1,d,s,a])*gam.h2[t-1,d] +
67             eIM0[t-1,d,s,a] *gam.m0[t-1,d] +
68             (eQSV[t-1,d,s,a]- nDth.sqv[t-1,d,s,a])*gam.s2[t-1,d] +
69             (eIS0v[t-1,d,s,a]- nDth.s0v[t-1,d,s,a])*gam.s0[t-1,d] +
70             (eHSv[t-1,d,s,a]- nDth.hosv[t-1,d,s,a])*gam.h2[t-1,d] +
71             eIM0v[t-1,d,s,a] *gam.m0[t-1,d]
72
73         } # end for d in 1:dd

```

```

1
2
3 RE[t,s,a] <-eRE[t,1,s,a]
4
5     tw1 <-(t-ts); if(tw1<3) { tw1<-3 }
6     for(w in 2:tw1) {
7       eRE[t,w,s,a] <- eRE[t-1,w-1,s,a]*(1-rADth0[t.dr,s,a]) *(1-gimm.wan[w-1])
8
9       if(w==tw1) {
10        eRE[t,w,s,a] <- (eRE[t,w-1,s,a]+eRE[t-1,w,s,a]) *(1-rADth0[t.dr,s,a]) *(1-gimm.wan[tw1])
11      }
12
13 RE[t,s,a] <-RE[t,s,a] +eRE[t,w,s,a]
14
15     } # end w in 2:tw1

```

```

#-----
16 N[t,s,a] <- SU[t,s,a] + SU.vac[t,s,a] + SU.rec[t,s,a] +
17     EX[t,s,a] + EXv1[t,s,a] + EXv2[t,s,a] +
18     IO[t,s,a] + IOv1[t,s,a] + IOv2[t,s,a] +
19     IM0[t,s,a] + ISO[t,s,a] +
20     ISq[t,s,a] + QS[t,s,a] +
21     ISh[t,s,a] + HS[t,s,a] +
22     IM0v[t,s,a] + IS0v[t,s,a] +
23     ISqv[t,s,a] + QSV[t,s,a] +
24     IShv[t,s,a] + Hsv[t,s,a] +
25     VA0[t,s,a] + VAef1[t,s,a] + VAef2[t,s,a] +
26     RE[t,s,a]
27
28 #-----
29     } #-----End for age in 1:18 #####
30     } #-----End for sex in 1:2 #####
31
32 } ##### end if t>ts #####

```

```

#-----
33 # Upgrading age at the beginning of a year (t1)
34 # jN[a], etc. are used to record N[a], etc. before their adjustments, because
35 # unchanged N[a] is required for the adjustment of N[a+1], etc.
36 #-----
37 if(t==tage) {
38   for(s in 1:2) {
39     for(a in 1:10) {
40       if(a>1) { Ag1<-1; Ag2<-1; Ag3<-10; Ag4<-10; a1<-(a-1) } # for age 10 to 79
41       if(a==1) { Ag1<-1; Ag2<-0; Ag3<-5; Ag4<-5; a1<-1 } # for age 0-4
42       if(a==2) { Ag1<-1; Ag2<-1; Ag3<-5; Ag4<-5; a1<-1 } # for age 5-9
43       if(a==3) { Ag1<-1; Ag2<-1; Ag3<-10; Ag4<-5; a1<-2 } # for age 10-19
44       if(a==10) { Ag1<-0; Ag2<-1; Ag3<-10; Ag4<-10; a1<-9 } # for age 80+
45       jN[a] <- N[t,s,a]
46       N[t,s,a] <- N[t,s,a] - Ag1* N[t,s,a]/(Ag3) + Ag2* jN[a1]/(Ag4)
47       jSU[a] <- SU[t,s,a]
48       SU[t,s,a] <- SU[t,s,a] - Ag1* SU[t,s,a]/(Ag3) + Ag2* jSU[a1]/(Ag4)
49       jRE[a] <- RE[t,s,a]
50       RE[t,s,a] <- RE[t,s,a] - Ag1* RE[t,s,a]/(Ag3) + Ag2* jRE[a1]/(Ag4)
51       jEX[a] <- EX[t,s,a]
52       EX[t,s,a] <- EX[t,s,a] - Ag1* EX[t,s,a]/(Ag3) + Ag2* jEX[a1]/(Ag4)
53       jIO[a] <- IO[t,s,a]
54       IO[t,s,a] <- IO[t,s,a] - Ag1* IO[t,s,a]/(Ag3) + Ag2* jIO[a1]/(Ag4)
55       jIM0[a] <- IM0[t,s,a]
56       IM0[t,s,a] <- IM0[t,s,a] - Ag1* IM0[t,s,a]/(Ag3) + Ag2* jIM0[a1]/(Ag4)
57       jIS0[a] <- IS0[t,s,a]
58       IS0[t,s,a] <- IS0[t,s,a] - Ag1* IS0[t,s,a]/(Ag3) + Ag2* jIS0[a1]/(Ag4)
59       jISq[a] <- ISq[t,s,a]
60       ISq[t,s,a] <- ISq[t,s,a] - Ag1* ISq[t,s,a]/(Ag3) + Ag2* jISq[a1]/(Ag4)
61       jISh[a] <- ISh[t,s,a]
62       ISh[t,s,a] <- ISh[t,s,a] - Ag1* ISh[t,s,a]/(Ag3) + Ag2* jISh[a1]/(Ag4)
63       jQS[a] <- QS[t,s,a]
64       QS[t,s,a] <- QS[t,s,a] - Ag1* QS[t,s,a]/(Ag3) + Ag2* jQS[a1]/(Ag4)
65       jHS[a] <- HS[t,s,a]
66       HS[t,s,a] <- HS[t,s,a] - Ag1* HS[t,s,a]/(Ag3) + Ag2* jHS[a1]/(Ag4)

```

```

1
2      jEXv1[a] <- EXv1[t,s,a]
3      EXv1[t,s,a] <- EXv1[t,s,a] - Ag1* EXv1[t,s,a]/(Ag3) +Ag2*jEXv1[a1]/(Ag4)
4      jI0v1[a] <- I0v1[t,s,a]
5      I0v1[t,s,a] <- I0v1[t,s,a] - Ag1* I0v1[t,s,a]/(Ag3) +Ag2*jI0v1[a1]/(Ag4)
6      jEXv2[a] <- EXv2[t,s,a]
7      EXv2[t,s,a] <- EXv2[t,s,a] - Ag1* EXv2[t,s,a]/(Ag3) +Ag2*jEXv2[a1]/(Ag4)
8      jI0v2[a] <- I0v2[t,s,a]
9      I0v2[t,s,a] <- I0v2[t,s,a] - Ag1* I0v2[t,s,a]/(Ag3) +Ag2*jI0v2[a1]/(Ag4)
10
11     jIM0v[a] <- IM0v[t,s,a]
12     IM0v[t,s,a] <- IM0v[t,s,a] -Ag1* IM0v[t,s,a]/(Ag3) +Ag2*jIM0v[a1]/(Ag4)
13     jIS0v[a] <- IS0v[t,s,a]
14     IS0v[t,s,a] <- IS0v[t,s,a] -Ag1* IS0v[t,s,a]/(Ag3) +Ag2*jIS0v[a1]/(Ag4)
15     jISqv[a] <- ISqv[t,s,a]
16     ISqv[t,s,a] <- ISqv[t,s,a] -Ag1* ISqv[t,s,a]/(Ag3) +Ag2*jISqv[a1]/(Ag4)
17     jIShv[a] <- IShv[t,s,a]
18     IShv[t,s,a] <- IShv[t,s,a] -Ag1* IShv[t,s,a]/(Ag3) +Ag2*jIShv[a1]/(Ag4)
19     jQSv[a] <- QSv[t,s,a]
20     QSv[t,s,a] <- QSv[t,s,a] -Ag1* QSv[t,s,a]/(Ag3) +Ag2*jQSv[a1]/(Ag4)
21     jHSv[a] <- HSv[t,s,a]
22     HSv[t,s,a] <- HSv[t,s,a] -Ag1* HSv[t,s,a]/(Ag3) +Ag2*jHSv[a1]/(Ag4)
23     jSU.vac[a] <- SU.vac[t,s,a]
24     SU.vac[t,s,a] <- SU.vac[t,s,a] -Ag1* SU.vac[t,s,a]/(Ag3) +Ag2*jSU.vac[a1]/(Ag4)
25     jSU.rec[a] <- SU.rec[t,s,a]
26     SU.rec[t,s,a] <- SU.rec[t,s,a] -Ag1* SU.rec[t,s,a]/(Ag3) +Ag2*jSU.rec[a1]/(Ag4)
27     jVA0[a] <- VA0[t,s,a]
28     VA0[t,s,a] <- VA0[t,s,a] -Ag1* VA0[t,s,a]/(Ag3) +Ag2*jVA0[a1]/(Ag4)
29
30     jVAef1[a] <- VAef1[t,s,a]
31     VAef1[t,s,a] <- VAef1[t,s,a] -Ag1* VAef1[t,s,a]/(Ag3) +Ag2*jVAef1[a1]/(Ag4)
32     jVAef2[a] <- VAef2[t,s,a]
33     VAef2[t,s,a] <- VAef2[t,s,a] -Ag1* VAef2[t,s,a]/(Ag3) +Ag2*jVAef2[a1]/(Ag4)
34
35     for(d in 1:dd) {
36       jeEX[d,a] <- eEX[t,d,s,a]
37       eEX[t,d,s,a] <- eEX[t,d,s,a] -Ag1* eEX[t,d,s,a]/(Ag3) +Ag2* jeEX[d,a1]/(Ag4)
38       jeI0[d,a] <- eI0[t,d,s,a]
39       eI0[t,d,s,a] <- eI0[t,d,s,a] -Ag1* eI0[t,d,s,a]/(Ag3) +Ag2* jeI0[d,a1]/(Ag4)
40       jeIM0[d,a] <- eIM0[t,d,s,a]
41       eIM0[t,d,s,a] <- eIM0[t,d,s,a] -Ag1* eIM0[t,d,s,a]/(Ag3) +Ag2* jeIM0[d,a1]/(Ag4)
42       jeIS0[d,a] <- eIS0[t,d,s,a]
43       eIS0[t,d,s,a] <- eIS0[t,d,s,a] -Ag1* eIS0[t,d,s,a]/(Ag3) +Ag2* jeIS0[d,a1]/(Ag4)
44       jeISqv[d,a] <- eISqv[t,d,s,a]
45       eISqv[t,d,s,a] <- eISqv[t,d,s,a] -Ag1* eISqv[t,d,s,a]/(Ag3) +Ag2* jeISqv[d,a1]/(Ag4)
46       jeIShv[d,a] <- eIShv[t,d,s,a]
47       eIShv[t,d,s,a] <- eIShv[t,d,s,a] -Ag1* eIShv[t,d,s,a]/(Ag3) +Ag2* jeIShv[d,a1]/(Ag4)
48       jeQS[d,a] <- eQS[t,d,s,a]
49       eQS[t,d,s,a] <- eQS[t,d,s,a] -Ag1* eQS[t,d,s,a]/(Ag3) +Ag2* jeQS[d,a1]/(Ag4)
50       jeHS[d,a] <- eHS[t,d,s,a]
51       eHS[t,d,s,a] <- eHS[t,d,s,a] -Ag1* eHS[t,d,s,a]/(Ag3) +Ag2* jeHS[d,a1]/(Ag4)
52
53       jeEXv1[d,a] <- eEXv1[t,d,s,a]
54       eEXv1[t,d,s,a] <- eEXv1[t,d,s,a] -Ag1* eEXv1[t,d,s,a]/(Ag3) +Ag2* jeEXv1[d,a1]/(Ag4)
55       jeI0v1[d,a] <- eI0v1[t,d,s,a]
56       eI0v1[t,d,s,a] <- eI0v1[t,d,s,a] -Ag1* eI0v1[t,d,s,a]/(Ag3) +Ag2* jeI0v1[d,a1]/(Ag4)
57       jeEXv2[d,a] <- eEXv2[t,d,s,a]
58       eEXv2[t,d,s,a] <- eEXv2[t,d,s,a] -Ag1* eEXv2[t,d,s,a]/(Ag3) +Ag2* jeEXv2[d,a1]/(Ag4)
59       jeI0v2[d,a] <- eI0v2[t,d,s,a]
60       eI0v2[t,d,s,a] <- eI0v2[t,d,s,a] -Ag1* eI0v2[t,d,s,a]/(Ag3) +Ag2* jeI0v2[d,a1]/(Ag4)
61
62       jeIM0v[d,a] <- eIM0v[t,d,s,a]
63       eIM0v[t,d,s,a] <- eIM0v[t,d,s,a] -Ag1* eIM0v[t,d,s,a]/(Ag3) +Ag2* jeIM0v[d,a1]/(Ag4)
64       jeIS0v[d,a] <- eIS0v[t,d,s,a]
65       eIS0v[t,d,s,a] <- eIS0v[t,d,s,a] -Ag1* eIS0v[t,d,s,a]/(Ag3) +Ag2* jeIS0v[d,a1]/(Ag4)
66       jeISqv[d,a] <- eISqv[t,d,s,a]
67       eISqv[t,d,s,a] <- eISqv[t,d,s,a] -Ag1* eISqv[t,d,s,a]/(Ag3) +Ag2* jeISqv[d,a1]/(Ag4)
68       jeIShv[d,a] <- eIShv[t,d,s,a]
69       eIShv[t,d,s,a] <- eIShv[t,d,s,a] -Ag1* eIShv[t,d,s,a]/(Ag3) +Ag2* jeIShv[d,a1]/(Ag4)
70       jeQSv[d,a] <- eQSv[t,d,s,a]
71       eQSv[t,d,s,a] <- eQSv[t,d,s,a] -Ag1* eQSv[t,d,s,a]/(Ag3) +Ag2* jeQSv[d,a1]/(Ag4)

```

```

1
2     jeHSv[d,a] <- eHSv[t,d,s,a]
3     eHSv[t,d,s,a] <- eHSv[t,d,s,a] -Ag1* eHSv[t,d,s,a]/(Ag3) +Ag2* jeHSv[d,a1]/(Ag4)
4     jeInf[d,a] <- eInf[t,d,s,a]
5     eInf[t,d,s,a] <- eInf[t,d,s,a] -Ag1* eInf[t,d,s,a]/(Ag3) +Ag2* jeInf[d,a1]/(Ag4)
6     jeInfv[d,a] <- eInfv[t,d,s,a]
7     eInfv[t,d,s,a] <- eInfv[t,d,s,a] -Ag1* eInfv[t,d,s,a]/(Ag3) +Ag2* jeInfv[d,a1]/(Ag4)
8     } # end d in 1:dd
9
10    for(v in 1:dv0) {
11      jeVA0[v,a] <- eVA0[t,v,s,a]
12      eVA0[t,v,s,a] <- eVA0[t,v,s,a] -Ag1* eVA0[t,v,s,a]/(Ag3) +Ag2*jeVA0[v,a1]/(Ag4)
13    } # end dt in 1:14
14
15    for(w in 1:tv0) {
16      jeVAef1[w,a] <- eVAef1[t,w,s,a]
17      eVAef1[t,w,s,a] <- eVAef1[t,w,s,a] -Ag1* eVAef1[t,w,s,a]/(Ag3) +Ag2* jeVAef1[w,a1]/(Ag4)
18    }
19
20    tv1 <- (t-vac.tim[1]); if(tv1<1) { tv1<-2 }
21    for(w in 1:tv1) {
22      jeVAef2[w,a] <- eVAef2[t,w,s,a]
23      eVAef2[t,w,s,a] <- eVAef2[t,w,s,a] -Ag1* eVAef2[t,w,s,a]/(Ag3) +Ag2* jeVAef2[w,a1]/(Ag4)
24    }
25
26    tw1 <- (t-ts); if(tw1<2) { tw1<-2 }
27    for(w in 1:tw1) {
28      jeRE[w,a] <- eRE[t,w,s,a]
29      eRE[t,w,s,a] <- eRE[t,w,s,a] -Ag1* eRE[t,w,s,a]/(Ag3) +Ag2* jeRE[w,a1]/(Ag4)
30    }
31  } # end a
32  } # end s
33
34  tage <- tage+365 # t for next age shifting up
35  } # end if t==tage
36
37  #=====
38  # Population estimates and all cause deaths
39  # add births and minus all cause deaths according to 5yr average death rates
40  #=====
41
42  for(s in 1:2) {
43    for(a in 1:10) {
44
45      # Monitoring deaths in SU, RE and Effectively vaccinated (non-covid deaths)
46      nDth.oth[t-1,s,a] <- (SU[t-1,s,a] +RE[t-1,s,a] +SU.vac[t-1,s,a] +SU.rec[t-1,s,a] +
47        VA0[t-1,s,a] +VAef1[t-1,s,a] +VAef2[t-1,s,a]) *(rADth0[t.dr,s,a])
48
49      # All deaths:
50      nDth.all[t-1,s,a] <- nDth.oth[t-1,s,a] +nDth.cov[t-1,s,a]
51
52    }
53  }
54
55  #=====
56  # Total numbers of S, E, I and R:
57  #-----
58
59  SU[t,3,11] <- SU[t,3,11] + SU[t,s,a]
60  EX[t,3,11] <- EX[t,3,11] + EX[t,s,a]
61  EXv1[t,3,11] <- EXv1[t,3,11] + EXv1[t,s,a]
62  EXv2[t,3,11] <- EXv2[t,3,11] + EXv2[t,s,a]
63  I0[t,3,11] <- I0[t,3,11] + I0[t,s,a]
64  I0v1[t,3,11] <- I0v1[t,3,11] + I0v1[t,s,a]
65  I0v2[t,3,11] <- I0v2[t,3,11] + I0v2[t,s,a]
66  IM0[t,3,11] <- IM0[t,3,11] + IM0[t,s,a]
67  IS0[t,3,11] <- IS0[t,3,11] + IS0[t,s,a]
68  ISq[t,3,11] <- ISq[t,3,11] + ISq[t,s,a]
69  ISh[t,3,11] <- ISh[t,3,11] + ISh[t,s,a]
70  QS[t,3,11] <- QS[t,3,11] + QS[t,s,a]
71  HS[t,3,11] <- HS[t,3,11] + HS[t,s,a]
72  IM0v[t,3,11] <- IM0v[t,3,11] + IM0v[t,s,a]

```

```

1
2     IS0v[t,3,11] <- IS0v[t,3,11] + IS0v[t,s,a]
3     ISqv[t,3,11] <- ISqv[t,3,11] + ISqv[t,s,a]
4     IShv[t,3,11] <- IShv[t,3,11] + IShv[t,s,a]
5     QSV[t,3,11] <- QSV[t,3,11] + QSV[t,s,a]
6     Hsv[t,3,11] <- Hsv[t,3,11] + Hsv[t,s,a]
7
8     SU.vac[t,3,11] <- SU.vac[t,3,11] + SU.vac[t,s,a]
9     SU.rec[t,3,11] <- SU.rec[t,3,11] + SU.rec[t,s,a]
10
11     RE[t,3,11] <- RE[t,3,11] + RE[t,s,a]
12
13     N[t,3,11] <- N[t,3,11] + N[t,s,a]
14
15     HS.new[t,3,11] <- HS.new[t,3,11] + HS.new[t,s,a]
16
17     allHS[t] <- allHS[t] + HS[t,s,a] + Hsv[t,s,a]
18
19     nDth.cov[t-1,3,11] <- round( nDth.cov[t-1,3,11] + nDth.cov[t-1,s,a] )
20
21     nDthHos.all[t-1,3,11] <- nDthHos.all[t-1,3,11] +
22         nDthHos.all[t-1,s,a] + nDthHos.allv[t-1,s,a]
23
24     nDth.ss[t-1,3,11] <- nDth.ss[t-1,3,11] +
25         nDth.ss[t-1,s,a] + nDth.ssv[t-1,s,a]
26
27     nDth.oth[t-1,3,11] <- nDth.oth[t-1,3,11] + nDth.oth[t-1,s,a]
28
29     nDth.all[t-1,3,11] <- nDth.all[t-1,3,11] + nDth.all[t-1,s,a]
30
31     #-----
32     # Assume the births = normal deaths to maintain the total N unchanged over time:
33     dBth[1] <- nDth.all[t-1,3,11]
34
35     New.expal[t-1,3,11] <- New.expal[t-1,3,11] + New.expal[t-1,s,a]
36
37     New.expsu[t-1,3,11] <- New.expsu[t-1,3,11] + New.expsu[t-1,s,a]
38     New.expv0[t-1,3,11] <- New.expv0[t-1,3,11] + New.expv0[t-1,s,a]
39     New.expv1[t-1,3,11] <- New.expv1[t-1,3,11] + New.expv1[t-1,s,a]
40     New.expv2[t-1,3,11] <- New.expv2[t-1,3,11] + New.expv2[t-1,s,a]
41     New.explosrec[t-1,3,11] <- New.explosrec[t-1,3,11] + New.explosrec[t-1,s,a]
42
43     New.vac[t-1,3,11] <- New.vac[t-1,3,11] + New.vac[t-1,s,a]
44
45     New.sym[t,3,11] <- round( New.sym[t,3,11] + New.sym[t,s,a] )
46
47     VA0[t,3,11] <- VA0[t,3,11] + VA0[t,s,a]
48     VAef1[t,3,11] <- VAef1[t,3,11] + VAef1[t,s,a]
49     VAef2[t,3,11] <- VAef2[t,3,11] + VAef2[t,s,a]
50
51     } # end a
52     } # end s
53
54     # Avoiding extremely small scientific notation for these variables
55
56     SU.vac[t,3,11] <- round(SU.vac[t,3,11], digits=0)
57     SU.rec[t,3,11] <- round(SU.rec[t,3,11], digits=0)
58     VAef1[t,3,11] <- round( VAef1[t,3,11], digits=0)
59     VAef2[t,3,11] <- round( VAef2[t,3,11], digits=0)
60
61     #####
62     ## Cumulative number of deaths
63     ##-----
64     nDthcum.cov[t] <- nDthcum.cov[t-1] + nDth.cov[t-1,3,11]
65
66     # Sum of all infected at t:
67     Infect.sum[t] <- EX[t,3,11] + EXv1[t,3,11] + EXv2[t,3,11] +
68         IO[t,3,11] + IOv1[t,3,11] + IOv2[t,3,11] +
69         IMO[t,3,11] +
70         IS0[t,3,11] +
71         ISq[t,3,11] + QS[t,3,11] +

```



```

1
2           ISh[t,3,11] + HS[t,3,11] +
3           IM0v[t,3,11] +
4           IS0v[t,3,11] +
5           ISqv[t,3,11] + QSV[t,3,11] +
6           IShv[t,3,11] + HSv[t,3,11]
7
8 #####
9 # Obtaining N[t,3,11], and so on:
10 #####
11     for(a in 1:10)      {
12     for(s in 1:2)      {
13         N[t,s,11] <- N[t,s,11] + N[t,s,a]
14         N[t,3,a] <- N[t,3,a] + N[t,s,a]
15     }
16     }
17
18     t.dr <- t.dr +1          # incremental by one day for daily death rate
19
20     }          # end for t in 2:tt
21
22 #####
23 # Output scenario specific results
24 #####
25
26     Result.mul <- data.frame(Rt[,], N[,3,11], SU[,3,11], SU.rec[,3,11], SU.vac[,3,11], RE[,3,11], VAef1[,3,11],
27     VAef2[,3,11], New.vac[,3,11], New.expal[,3,11], New.sym[,3,11], HS.new[,3,11], allHS[,],
28     Infect.sum[,], nDth.cov[,3,11], nDthcum.cov[,], nDth.all[,3,11] )
29
30     OutFileName <- paste("...\\ResOut".out", sep="")
31
32     write.table(Result.mul,file=OutFileName, sep="\t",quote=FALSE,append=TRUE,col.names=FALSE)
33
34
35
36
37
38
39
40
41
42
43
44
45
46
47
48
49
50
51
52
53
54
55
56
57
58
59
60

```

## 5.2 Input data files for running the R code

### 5.2-1 Age-sex-specific population, case-fatality rates, and hospitalisation rates “inParamet20.csv”

| agrp | age | n_m      | n_f      | cft_m    | cft_f    | hosp_r   |
|------|-----|----------|----------|----------|----------|----------|
| 1    | 0   | 1679.281 | 1596.919 | 3.22E-05 | 1.95E-05 | 0.000141 |
| 2    | 5   | 1815.031 | 1728.698 | 3.22E-05 | 1.95E-05 | 0.000141 |
| 3    | 10  | 3334.701 | 3166.337 | 0.000183 | 0.000111 | 0.000516 |
| 4    | 20  | 3722.353 | 3549.491 | 0.000742 | 0.00045  | 0.014247 |
| 5    | 30  | 3776.43  | 3800.291 | 0.001806 | 0.001094 | 0.051194 |
| 6    | 40  | 3541.015 | 3593.888 | 0.003649 | 0.002211 | 0.070833 |
| 7    | 50  | 3753.483 | 3861.581 | 0.01546  | 0.00937  | 0.16     |
| 8    | 60  | 2904.167 | 3053.137 | 0.049348 | 0.029908 | 0.318919 |
| 9    | 70  | 2258.713 | 2521.105 | 0.106488 | 0.064538 | 0.535484 |
| 10   | 80  | 1163.586 | 1690.569 | 0.16573  | 0.100442 | 0.593548 |

### 5.2-2 General and household contacts per person day “inCMATRIX10.csv”

| agegrp | a01     | a02     | a03     | a04     | a05     | a06     | a07     | a08     | a09     | a10    | h01     | h02     | h03     | h04    | h05     | h06     | h07     | h08     | h09     | h10    |
|--------|---------|---------|---------|---------|---------|---------|---------|---------|---------|--------|---------|---------|---------|--------|---------|---------|---------|---------|---------|--------|
| 1      | 1.7112  | 0.8034  | 0.6746  | 0.9657  | 1.644   | 0.6343  | 0.3257  | 0.1181  | 0.0446  | 0.0144 | 0.4788  | 0.5519  | 0.4667  | 0.4201 | 0.9003  | 0.188   | 0.06    | 0.0069  | 0.0005  | 0.001  |
| 2      | 0.6816  | 4.0343  | 0.9241  | 0.527   | 1.5545  | 0.9406  | 0.3     | 0.1504  | 0.053   | 0.027  | 0.2633  | 0.9183  | 0.6405  | 0.195  | 1.0256  | 0.3971  | 0.0324  | 0.0024  | 0.0003  | 0      |
| 3      | 0.24695 | 1.2525  | 7.7556  | 1.1873  | 1.3592  | 1.5294  | 0.5501  | 0.12925 | 0.05445 | 0.0531 | 0.13135 | 0.34485 | 1.43255 | 0.106  | 0.56165 | 0.624   | 0.0924  | 0.022   | 0.0019  | 0.0002 |
| 4      | 0.58115 | 0.35205 | 1.5978  | 3.92775 | 2.21165 | 1.94385 | 0.9814  | 0.1812  | 0.04545 | 0.0513 | 0.3288  | 0.1887  | 0.2676  | 0.8976 | 0.1759  | 0.25075 | 0.2221  | 0.0292  | 0.00135 | 0.0016 |
| 5      | 0.51325 | 0.91745 | 1.0955  | 1.8358  | 3.2517  | 2.0502  | 1.05485 | 0.27515 | 0.09215 | 0.0632 | 0.3491  | 0.5867  | 0.5529  | 0.0839 | 0.73455 | 0.0971  | 0.04185 | 0.019   | 0       | 0      |
| 6      | 0.1894  | 0.51185 | 1.8394  | 1.72385 | 2.3032  | 3.32855 | 1.1846  | 0.2469  | 0.09625 | 0.068  | 0.14665 | 0.3314  | 1.09355 | 0.2537 | 0.18465 | 0.5841  | 0.07945 | 0.02515 | 0.00905 | 0.0082 |
| 7      | 0.16105 | 0.16875 | 0.8093  | 1.867   | 1.7188  | 2.0792  | 1.86615 | 0.56305 | 0.18725 | 0.122  | 0.0701  | 0.05255 | 0.41045 | 0.3961 | 0.09315 | 0.10955 | 0.4917  | 0.05785 | 0.0032  | 0.0024 |
| 8      | 0.0431  | 0.23415 | 0.30125 | 0.7199  | 0.9967  | 0.9832  | 0.9769  | 0.9971  | 0.22895 | 0.1383 | 0.03365 | 0.03505 | 0.1736  | 0.1045 | 0.1491  | 0.17185 | 0.11215 | 0.5643  | 0.03465 | 0      |
| 9      | 0.0467  | 0.02455 | 0.4952  | 0.54    | 0.38355 | 0.9781  | 0.63465 | 0.8508  | 0.88915 | 1.0773 | 0.0103  | 0.0112  | 0.2227  | 0.0135 | 0.0207  | 0.25315 | 0.0555  | 0.1004  | 0.31395 | 0.3604 |
| 10     | 0.0206  | 0.0007  | 0.2481  | 0.1256  | 0.386   | 0.7299  | 0.4298  | 0.4669  | 1.0408  | 1.4766 | 0.0206  | 0       | 0.0362  | 0.0186 | 0.0414  | 0.1252  | 0.0766  | 0       | 0.3811  | 0.5412 |

### 5.2-3 Transmission related input parameters “inParamet20.csv”

| paramet | t_ts  | t_73  | t_77  | t_84  | t_187 | t_254 | t_310 | t_337 | t_371 | t_433 | t_506 | re_norm |
|---------|-------|-------|-------|-------|-------|-------|-------|-------|-------|-------|-------|---------|
| rFSQ1   | 0.1   | 0.1   | 0.4   | 0.8   | 0.9   | 0.9   | 0.9   | 0.9   | 0.9   | 0.9   | 0.9   | 0.9     |
| rFSQ2   | 0.1   | 0.2   | 0.6   | 0.8   | 0.95  | 0.95  | 0.95  | 0.95  | 0.95  | 0.95  | 0.95  | 0.95    |
| rFSQ3   | 0.1   | 0.4   | 0.8   | 0.9   | 0.95  | 0.95  | 0.95  | 0.95  | 0.95  | 0.95  | 0.95  | 0.95    |
| a1m     | 4     | 4     | 4     | 4     | 4     | 4     | 4     | 4     | 4     | 4     | 4     | 4       |
| a1s     | 2     | 2     | 2     | 2     | 2     | 2     | 2     | 2     | 2     | 2     | 2     | 2       |
| a2m     | 1.5   | 1.5   | 1.5   | 1.5   | 1.5   | 1.5   | 1.5   | 1.5   | 1.5   | 1.5   | 1.5   | 1.5     |
| a2s     | 1.061 | 1.061 | 1.061 | 1.061 | 1.061 | 1.061 | 1.061 | 1.061 | 1.061 | 1.061 | 1.061 | 1.061   |
| gm0m    | 5     | 5     | 5     | 5     | 5     | 5     | 5     | 5     | 5     | 5     | 5     | 5       |
| gm0s    | 2.236 | 2.236 | 2.236 | 2.236 | 2.236 | 2.236 | 2.236 | 2.236 | 2.236 | 2.236 | 2.236 | 2.236   |
| gs0m    | 5     | 5     | 5     | 5     | 5     | 5     | 5     | 5     | 5     | 5     | 5     | 5       |
| gs0s    | 2.236 | 2.236 | 2.236 | 2.236 | 2.236 | 2.236 | 2.236 | 2.236 | 2.236 | 2.236 | 2.236 | 2.236   |
| gs1m    | 4     | 3     | 3     | 2     | 2     | 2     | 2     | 2     | 2     | 2     | 2     | 2       |
| gs1s    | 2     | 1.732 | 1.732 | 1.414 | 1.414 | 1.414 | 1.414 | 1.414 | 1.414 | 1.414 | 1.414 | 1.414   |
| gs2m    | 2     | 3     | 3     | 4     | 4     | 4     | 4     | 4     | 4     | 4     | 4     | 4       |
| gs2s    | 1.414 | 1.732 | 1.732 | 2     | 2     | 2     | 2     | 2     | 2     | 2     | 2     | 2       |
| gh1m    | 4     | 3     | 3     | 2     | 2     | 2     | 2     | 2     | 2     | 2     | 2     | 2       |
| gh1s    | 2     | 1.732 | 1.732 | 1.414 | 1.414 | 1.414 | 1.414 | 1.414 | 1.414 | 1.414 | 1.414 | 1.414   |
| gh2m    | 10    | 10    | 10    | 10    | 10    | 10    | 10    | 10    | 10    | 10    | 10    | 10      |
| gn2s    | 3.162 | 3.162 | 3.162 | 3.162 | 3.162 | 3.162 | 3.162 | 3.162 | 3.162 | 3.162 | 3.162 | 3.162   |
| ac1a    | 1     | 0.9   | 0.8   | 0.4   | 0.6   | 0.8   | 0.6   | 0.7   | 0.4   | 0.7   | 0.9   | 1       |
| ac3a    | 1     | 0.8   | 0.7   | 0.3   | 0.55  | 0.6   | 0.3   | 0.6   | 0.3   | 0.6   | 0.8   | 1       |
| ac4a    | 1     | 0.7   | 0.6   | 0.2   | 0.4   | 0.5   | 0.2   | 0.5   | 0.2   | 0.5   | 0.7   | 1       |
| ac5a    | 1     | 0.6   | 0.5   | 0.15  | 0.2   | 0.3   | 0.15  | 0.3   | 0.15  | 0.3   | 0.6   | 1       |

5.2-4 Population age-sex-specific death risk by week “inDTH1519Eng10.csv”

| agrp | a01      | a02      | a03      | a04      | a05      | a06      | a07      | a08      | a09      | a10      |
|------|----------|----------|----------|----------|----------|----------|----------|----------|----------|----------|
| m01  | 0.002671 | 0.000229 | 0.000669 | 0.001443 | 0.002844 | 0.007457 | 0.01506  | 0.038052 | 0.097395 | 0.372278 |
| m02  | 0.002593 | 0.000153 | 0.000627 | 0.00166  | 0.002807 | 0.00697  | 0.014316 | 0.038425 | 0.098107 | 0.383425 |
| m03  | 0.002907 | 0.000229 | 0.00046  | 0.001479 | 0.002696 | 0.006708 | 0.01387  | 0.036699 | 0.094224 | 0.37748  |
| m04  | 0.002593 | 0.000229 | 0.000544 | 0.001479 | 0.002881 | 0.006445 | 0.014019 | 0.034694 | 0.093447 | 0.368439 |
| m05  | 0.002907 | 0.000229 | 0.000544 | 0.001407 | 0.00277  | 0.006745 | 0.014316 | 0.036233 | 0.091376 | 0.359646 |
| m06  | 0.002593 | 0.000229 | 0.00046  | 0.001299 | 0.002918 | 0.00652  | 0.013647 | 0.035487 | 0.091247 | 0.347509 |
| m07  | 0.002593 | 0.000229 | 0.000585 | 0.001515 | 0.002474 | 0.006033 | 0.013684 | 0.0353   | 0.090276 | 0.35333  |
| m08  | 0.002593 | 0.000153 | 0.000544 | 0.001696 | 0.002511 | 0.005808 | 0.013833 | 0.034694 | 0.088529 | 0.338221 |
| m09  | 0.002436 | 0.000229 | 0.000585 | 0.001515 | 0.002696 | 0.006558 | 0.013721 | 0.034648 | 0.088141 | 0.3324   |
| m10  | 0.00275  | 0.000153 | 0.000544 | 0.001227 | 0.00277  | 0.005996 | 0.013498 | 0.034974 | 0.086393 | 0.336487 |
| m11  | 0.002671 | 0.000153 | 0.000585 | 0.001443 | 0.002548 | 0.006258 | 0.013498 | 0.033622 | 0.085099 | 0.315062 |
| m12  | 0.002907 | 0.000153 | 0.00046  | 0.001407 | 0.002474 | 0.00652  | 0.013238 | 0.032689 | 0.082899 | 0.313328 |
| m13  | 0.002279 | 0.000153 | 0.000585 | 0.001588 | 0.002696 | 0.006183 | 0.012792 | 0.032736 | 0.083352 | 0.30404  |
| m14  | 0.002514 | 0.000153 | 0.000544 | 0.001299 | 0.002733 | 0.005696 | 0.012494 | 0.033015 | 0.082964 | 0.307879 |
| m15  | 0.002514 | 0.000229 | 0.000585 | 0.001588 | 0.002696 | 0.006183 | 0.013163 | 0.032736 | 0.081087 | 0.297724 |
| m16  | 0.002671 | 0.000229 | 0.000502 | 0.001299 | 0.002622 | 0.005808 | 0.01294  | 0.032176 | 0.080116 | 0.294132 |
| m17  | 0.002436 | 0.000153 | 0.000544 | 0.001588 | 0.002548 | 0.005546 | 0.012754 | 0.032036 | 0.078887 | 0.285463 |
| m18  | 0.002593 | 0.000153 | 0.000585 | 0.001407 | 0.002881 | 0.005771 | 0.012717 | 0.031943 | 0.07811  | 0.285339 |
| m19  | 0.002436 | 0.000153 | 0.000502 | 0.001515 | 0.002659 | 0.005883 | 0.012308 | 0.031523 | 0.078692 | 0.283977 |
| m20  | 0.002514 | 0.000153 | 0.000418 | 0.001335 | 0.002585 | 0.005808 | 0.012606 | 0.031104 | 0.076686 | 0.276794 |
| m21  | 0.002671 | 7.64E-05 | 0.000502 | 0.001479 | 0.002659 | 0.005733 | 0.012643 | 0.03129  | 0.075198 | 0.276051 |
| m22  | 0.0022   | 0.000306 | 0.000627 | 0.001696 | 0.002474 | 0.005321 | 0.012271 | 0.030451 | 0.074162 | 0.265029 |
| m23  | 0.002514 | 0.000306 | 0.000418 | 0.001515 | 0.002511 | 0.005471 | 0.012159 | 0.030264 | 0.076686 | 0.264286 |
| m24  | 0.002593 | 0.000306 | 0.000544 | 0.001299 | 0.002659 | 0.005996 | 0.012234 | 0.029705 | 0.074551 | 0.262552 |
| m25  | 0.002279 | 0.000153 | 0.000544 | 0.001371 | 0.002437 | 0.005621 | 0.012457 | 0.030217 | 0.076104 | 0.266886 |
| m26  | 0.002514 | 0.000229 | 0.000502 | 0.001263 | 0.002585 | 0.005471 | 0.011862 | 0.030264 | 0.07468  | 0.25896  |
| m27  | 0.002279 | 0.000153 | 0.000418 | 0.001551 | 0.002696 | 0.005359 | 0.012568 | 0.030684 | 0.075716 | 0.266639 |
| m28  | 0.002357 | 0.000153 | 0.000544 | 0.001479 | 0.002327 | 0.005584 | 0.011899 | 0.029891 | 0.072415 | 0.255988 |
| m29  | 0.002671 | 0.000229 | 0.000418 | 0.001371 | 0.002511 | 0.005659 | 0.012978 | 0.029984 | 0.073127 | 0.262799 |
| m30  | 0.002436 | 0.000229 | 0.000418 | 0.001263 | 0.002548 | 0.005771 | 0.01149  | 0.029098 | 0.07578  | 0.262056 |
| m31  | 0.002279 | 0.000153 | 0.000544 | 0.001551 | 0.002511 | 0.005584 | 0.011936 | 0.028958 | 0.071703 | 0.25252  |
| m32  | 0.002436 | 0.000306 | 0.000544 | 0.001371 | 0.002659 | 0.005846 | 0.012085 | 0.030404 | 0.073062 | 0.262304 |
| m33  | 0.00275  | 0.000229 | 0.000502 | 0.001299 | 0.002548 | 0.005621 | 0.011862 | 0.029425 | 0.074227 | 0.261313 |
| m34  | 0.002121 | 7.64E-05 | 0.000376 | 0.001299 | 0.002511 | 0.004797 | 0.012011 | 0.029378 | 0.073127 | 0.260322 |
| m35  | 0.002907 | 0.000153 | 0.000502 | 0.001588 | 0.002401 | 0.005021 | 0.012383 | 0.030404 | 0.071833 | 0.257226 |
| m36  | 0.001964 | 0.000153 | 0.000585 | 0.001371 | 0.002179 | 0.005434 | 0.011564 | 0.028539 | 0.07481  | 0.256359 |
| m37  | 0.002279 | 0.000153 | 0.000376 | 0.001335 | 0.002401 | 0.005171 | 0.011713 | 0.030031 | 0.07591  | 0.268992 |
| m38  | 0.002043 | 0.000229 | 0.000335 | 0.001335 | 0.002548 | 0.005359 | 0.012494 | 0.029425 | 0.073515 | 0.270354 |
| m39  | 0.002671 | 0.000153 | 0.000418 | 0.001191 | 0.002511 | 0.005246 | 0.011974 | 0.029891 | 0.076427 | 0.276546 |
| m40  | 0.002436 | 0.000229 | 0.000585 | 0.001515 | 0.002437 | 0.005471 | 0.012234 | 0.030031 | 0.079534 | 0.278528 |
| m41  | 0.002436 | 0.000153 | 0.000585 | 0.001371 | 0.002437 | 0.005509 | 0.012606 | 0.030357 | 0.079598 | 0.288435 |
| m42  | 0.002514 | 0.000153 | 0.000585 | 0.001407 | 0.00229  | 0.005621 | 0.011788 | 0.03087  | 0.078239 | 0.294008 |
| m43  | 0.002671 | 0.000229 | 0.000502 | 0.001299 | 0.00229  | 0.005359 | 0.012457 | 0.030964 | 0.078175 | 0.290417 |
| m44  | 0.002514 | 0.000229 | 0.000585 | 0.001227 | 0.002364 | 0.005509 | 0.012271 | 0.031803 | 0.081475 | 0.296609 |
| m45  | 0.002357 | 0.000229 | 0.000502 | 0.001118 | 0.002364 | 0.005284 | 0.012234 | 0.032502 | 0.081669 | 0.303421 |
| m46  | 0.002514 | 0.000229 | 0.00046  | 0.001443 | 0.002401 | 0.005584 | 0.012643 | 0.031383 | 0.082058 | 0.305402 |
| m47  | 0.00275  | 0.000153 | 0.000627 | 0.001227 | 0.002364 | 0.005621 | 0.012606 | 0.03171  | 0.082511 | 0.306145 |
| m48  | 0.002671 | 7.64E-05 | 0.00046  | 0.001443 | 0.002327 | 0.005434 | 0.013387 | 0.031756 | 0.080699 | 0.313824 |
| m49  | 0.002357 | 0.000306 | 0.000502 | 0.001335 | 0.002548 | 0.005434 | 0.013238 | 0.032782 | 0.085293 | 0.322369 |
| m50  | 0.002121 | 0.000306 | 0.000585 | 0.001371 | 0.002511 | 0.005471 | 0.013163 | 0.033388 | 0.086005 | 0.327199 |
| m51  | 0.002671 | 0.000306 | 0.000418 | 0.001299 | 0.002511 | 0.005584 | 0.013387 | 0.034135 | 0.088723 | 0.336859 |
| m52  | 0.002593 | 0.000382 | 0.00046  | 0.001299 | 0.002474 | 0.006108 | 0.013535 | 0.034508 | 0.089694 | 0.347509 |

|    |     |          |          |          |          |          |          |          |          |          |          |
|----|-----|----------|----------|----------|----------|----------|----------|----------|----------|----------|----------|
| 1  |     |          |          |          |          |          |          |          |          |          |          |
| 2  | f01 | 0.002314 | 0.00024  | 0.000308 | 0.000713 | 0.001725 | 0.004231 | 0.010467 | 0.026299 | 0.068384 | 0.358013 |
| 3  | f02 | 0.002562 | 0.000401 | 0.000308 | 0.000638 | 0.001652 | 0.003936 | 0.009381 | 0.025145 | 0.069481 | 0.368451 |
| 4  | f03 | 0.001901 | 0.00024  | 0.000352 | 0.000713 | 0.001725 | 0.0039   | 0.009344 | 0.024303 | 0.06821  | 0.364013 |
| 5  | f04 | 0.002396 | 0.00016  | 0.00022  | 0.000676 | 0.001432 | 0.003863 | 0.00891  | 0.023771 | 0.063301 | 0.347739 |
| 6  | f05 | 0.002149 | 0.00024  | 0.000352 | 0.000638 | 0.001578 | 0.003863 | 0.009417 | 0.023904 | 0.063994 | 0.342151 |
| 7  | f06 | 0.002644 | 0.00016  | 0.000352 | 0.000751 | 0.001578 | 0.003863 | 0.00891  | 0.023061 | 0.062897 | 0.322343 |
| 8  | f07 | 0.002066 | 0.00016  | 0.000308 | 0.000826 | 0.001468 | 0.004047 | 0.009018 | 0.02346  | 0.062261 | 0.320864 |
| 9  | f08 | 0.001983 | 0.00016  | 0.000352 | 0.000788 | 0.001578 | 0.00401  | 0.009018 | 0.022706 | 0.061626 | 0.315768 |
| 10 | f09 | 0.002231 | 0.00016  | 0.000308 | 0.000788 | 0.001615 | 0.00401  | 0.008801 | 0.023194 | 0.061453 | 0.311412 |
| 11 | f10 | 0.002066 | 0.00024  | 0.000396 | 0.000638 | 0.001432 | 0.00401  | 0.009091 | 0.022041 | 0.060818 | 0.308618 |
| 12 | f11 | 0.001901 | 8.02E-05 | 0.000308 | 0.000713 | 0.001542 | 0.003789 | 0.008729 | 0.022041 | 0.06024  | 0.301221 |
| 13 | f12 | 0.002149 | 0.00016  | 0.000352 | 0.000826 | 0.001395 | 0.003716 | 0.008366 | 0.02142  | 0.058681 | 0.286345 |
| 14 | f13 | 0.001983 | 0.00024  | 0.000264 | 0.000751 | 0.001615 | 0.003458 | 0.008692 | 0.022085 | 0.057872 | 0.280427 |
| 15 | f14 | 0.001901 | 0.00016  | 0.000308 | 0.000638 | 0.001468 | 0.003789 | 0.00862  | 0.021287 | 0.056024 | 0.275907 |
| 16 | f15 | 0.001983 | 0.00024  | 0.000352 | 0.000713 | 0.001468 | 0.003826 | 0.008475 | 0.021198 | 0.056428 | 0.273194 |
| 17 | f16 | 0.002066 | 0.00016  | 0.000352 | 0.000676 | 0.001505 | 0.003605 | 0.008765 | 0.02111  | 0.055331 | 0.267195 |
| 18 | f17 | 0.002066 | 0.00016  | 0.000308 | 0.000676 | 0.001468 | 0.003789 | 0.00804  | 0.02142  | 0.053771 | 0.257414 |
| 19 | f18 | 0.001735 | 0.00024  | 0.000264 | 0.000638 | 0.001395 | 0.003532 | 0.008149 | 0.020888 | 0.053078 | 0.253798 |
| 20 | f19 | 0.002066 | 0.00016  | 0.000308 | 0.000601 | 0.001395 | 0.003752 | 0.008547 | 0.020445 | 0.052963 | 0.254291 |
| 21 | f20 | 0.001983 | 0.00016  | 0.000352 | 0.000751 | 0.001578 | 0.003679 | 0.007968 | 0.020445 | 0.051865 | 0.248209 |
| 22 | f21 | 0.001901 | 0.00016  | 0.000264 | 0.000751 | 0.001505 | 0.003642 | 0.00804  | 0.020134 | 0.051923 | 0.246976 |
| 23 | f22 | 0.002149 | 0.00016  | 0.000264 | 0.000676 | 0.001468 | 0.003421 | 0.007932 | 0.019602 | 0.051403 | 0.237689 |
| 24 | f23 | 0.001901 | 8.02E-05 | 0.000308 | 0.000488 | 0.001468 | 0.003421 | 0.007968 | 0.020622 | 0.051634 | 0.234319 |
| 25 | f24 | 0.002314 | 0.00016  | 0.000396 | 0.000563 | 0.001358 | 0.003495 | 0.008258 | 0.019292 | 0.050883 | 0.237032 |
| 26 | f25 | 0.001983 | 0.00016  | 0.000176 | 0.000676 | 0.001505 | 0.003679 | 0.007714 | 0.019602 | 0.050826 | 0.238429 |
| 27 | f26 | 0.001653 | 8.02E-05 | 0.000396 | 0.000676 | 0.001468 | 0.003752 | 0.008185 | 0.019691 | 0.049266 | 0.231114 |
| 28 | f27 | 0.002066 | 0.00024  | 0.00044  | 0.000638 | 0.001395 | 0.003458 | 0.008511 | 0.019025 | 0.051865 | 0.237114 |
| 29 | f28 | 0.002149 | 0.00016  | 0.000352 | 0.000563 | 0.001432 | 0.003605 | 0.007896 | 0.018493 | 0.049959 | 0.225854 |
| 30 | f29 | 0.001735 | 8.02E-05 | 0.000264 | 0.000638 | 0.001432 | 0.003458 | 0.007859 | 0.019114 | 0.050017 | 0.235059 |
| 31 | f30 | 0.002066 | 0.00024  | 0.000308 | 0.000525 | 0.001725 | 0.003495 | 0.007751 | 0.019513 | 0.050537 | 0.235059 |
| 32 | f31 | 0.002231 | 0.00016  | 0.000264 | 0.000638 | 0.001505 | 0.003532 | 0.008004 | 0.018538 | 0.048689 | 0.223553 |
| 33 | f32 | 0.002149 | 8.02E-05 | 0.000352 | 0.000525 | 0.001432 | 0.003348 | 0.008113 | 0.019513 | 0.049035 | 0.23136  |
| 34 | f33 | 0.002066 | 8.02E-05 | 0.000308 | 0.000563 | 0.001395 | 0.003458 | 0.007896 | 0.018892 | 0.050306 | 0.230867 |
| 35 | f34 | 0.001735 | 0.00016  | 0.000352 | 0.000713 | 0.001358 | 0.003201 | 0.007533 | 0.020045 | 0.049959 | 0.231278 |
| 36 | f35 | 0.002231 | 8.02E-05 | 0.00022  | 0.000751 | 0.001395 | 0.003532 | 0.007896 | 0.018937 | 0.050364 | 0.226758 |
| 37 | f36 | 0.001818 | 0.00024  | 0.000264 | 0.000563 | 0.001285 | 0.003421 | 0.007751 | 0.018759 | 0.050537 | 0.22947  |
| 38 | f37 | 0.002066 | 0.00016  | 0.000308 | 0.000638 | 0.001358 | 0.003348 | 0.008222 | 0.019779 | 0.050999 | 0.229635 |
| 39 | f38 | 0.001901 | 0.00024  | 0.00022  | 0.000601 | 0.001285 | 0.003348 | 0.008294 | 0.019646 | 0.051519 | 0.236621 |
| 40 | f39 | 0.002314 | 0.00016  | 0.000264 | 0.000601 | 0.001468 | 0.003458 | 0.008403 | 0.019558 | 0.053194 | 0.245004 |
| 41 | f40 | 0.002231 | 0.00024  | 0.000352 | 0.000525 | 0.001321 | 0.003642 | 0.007896 | 0.020001 | 0.052327 | 0.245743 |
| 42 | f41 | 0.002396 | 8.02E-05 | 0.000352 | 0.000601 | 0.001248 | 0.003495 | 0.008222 | 0.019957 | 0.053713 | 0.259222 |
| 43 | f42 | 0.001901 | 0.00024  | 0.000264 | 0.000638 | 0.001395 | 0.003421 | 0.008004 | 0.02009  | 0.054176 | 0.259962 |
| 44 | f43 | 0.002231 | 0.00024  | 0.00022  | 0.000563 | 0.001358 | 0.003458 | 0.00833  | 0.020533 | 0.05406  | 0.25725  |
| 45 | f44 | 0.002231 | 0.00016  | 0.00022  | 0.000488 | 0.001615 | 0.003458 | 0.008801 | 0.020533 | 0.054233 | 0.267852 |
| 46 | f45 | 0.002231 | 0.00024  | 0.000396 | 0.000488 | 0.001432 | 0.003532 | 0.008801 | 0.020489 | 0.055619 | 0.270236 |
| 47 | f46 | 0.002149 | 0.000321 | 0.000396 | 0.000525 | 0.001395 | 0.003495 | 0.008801 | 0.020711 | 0.0551   | 0.270153 |
| 48 | f47 | 0.001818 | 0.00016  | 0.000308 | 0.000563 | 0.001468 | 0.003789 | 0.008366 | 0.021553 | 0.057525 | 0.269332 |
| 49 | f48 | 0.002066 | 0.00024  | 0.00022  | 0.000638 | 0.001505 | 0.0039   | 0.008403 | 0.021198 | 0.057352 | 0.279359 |
| 50 | f49 | 0.001983 | 0.00016  | 0.000264 | 0.000563 | 0.001432 | 0.003789 | 0.00891  | 0.021598 | 0.061511 | 0.290536 |
| 51 | f50 | 0.001901 | 0.00024  | 0.000352 | 0.000563 | 0.001468 | 0.004047 | 0.008366 | 0.022751 | 0.061164 | 0.298262 |
| 52 | f51 | 0.002314 | 0.00024  | 0.000352 | 0.000563 | 0.001505 | 0.003495 | 0.009091 | 0.023416 | 0.062435 | 0.311823 |
| 53 | f52 | 0.001901 | 0.00016  | 0.000352 | 0.000638 | 0.001615 | 0.003789 | 0.009055 | 0.023061 | 0.064687 | 0.316097 |
| 54 |     |          |          |          |          |          |          |          |          |          |          |
| 55 |     |          |          |          |          |          |          |          |          |          |          |
| 56 |     |          |          |          |          |          |          |          |          |          |          |
| 57 |     |          |          |          |          |          |          |          |          |          |          |
| 58 |     |          |          |          |          |          |          |          |          |          |          |
| 59 |     |          |          |          |          |          |          |          |          |          |          |
| 60 |     |          |          |          |          |          |          |          |          |          |          |

## 6. References for supplementary material

1. Lavine JS, Bjornstad ON, Antia R. Immunological characteristics govern the transition of COVID-19 to endemicity. *Science (New York, NY)* 2021;371(6530):741-45. doi: 10.1126/science.abe6522 [published Online First: 2021/01/14]
2. Olliaro P. What does 95% COVID-19 vaccine efficacy really mean? *Lancet Infect Dis* 2021 doi: 10.1016/s1473-3099(21)00075-x [published Online First: 2021/02/21]
3. Rock K, Brand S, Moir J, et al. Dynamics of infectious diseases. *Rep Prog Phys* 2014;77(2):026602. doi: 10.1088/0034-4885/77/2/026602 [published Online First: 2014/01/22]
4. Tuckwell HC, Williams RJ. Some properties of a simple stochastic epidemic model of SIR type. *Math Biosci* 2007;208(1):76-97. doi: 10.1016/j.mbs.2006.09.018 [published Online First: 2006/12/19]
5. Grant A. Dynamics of COVID-19 epidemics: SEIR models underestimate peak infection rates and overestimate epidemic duration. *medRxiv preprint* doi: <https://doi.org/10.1101/2020040220050674> 2020
6. Krylova O, Earn DJD. Effects of the infectious period distribution on predicted transitions in childhood disease dynamics. *J R Soc Interface* 2013;10(84):20130098-98. doi: 10.1098/rsif.2013.0098
7. Davies NG, Kucharski AJ, Eggo RM, et al. Effects of non-pharmaceutical interventions on COVID-19 cases, deaths, and demand for hospital services in the UK: a modelling study. *The Lancet Public health* 2020;5(7):e375-e85. doi: 10.1016/s2468-2667(20)30133-x [published Online First: 2020/06/06]
8. GOV.UK. Coronavirus (COVID-19) in the UK 2021 [Available from: <https://coronavirus.data.gov.uk/> accessed 31 July 2021.
9. Davies NG, Klepac P, Liu Y, et al. Age-dependent effects in the transmission and control of COVID-19 epidemics. *Nature medicine* 2020;26(8):1205-11. doi: 10.1038/s41591-020-0962-9 [published Online First: 2020/06/18]
10. Zhang J, Litvinova M, Wang W, et al. Evolving epidemiology and transmission dynamics of coronavirus disease 2019 outside Hubei province, China: a descriptive and modelling study. *Lancet Infect Dis* 2020 doi: 10.1016/s1473-3099(20)30230-9 [published Online First: 2020/04/06]
11. Ferguson N, Laydon D, Nedjati-Gilani G, et al. Impact of non-pharmaceutical interventions (NPIs) to reduce COVID-19 mortality and healthcare demand.: Imperial College COVID-19 Response Team., 2020.
12. Verity R, Okell LC, Dorigatti I, et al. Estimates of the severity of coronavirus disease 2019: a model-based analysis. *Lancet Infect Dis* 2020 doi: 10.1016/s1473-3099(20)30243-7 [published Online First: 2020/04/03]
13. Chinese Center of Disease Prevention and Control. [The epidemiological characteristics of an outbreak of 2019 novel coronavirus diseases (COVID-19) in China]. *Zhonghua Liu Xing Bing Xue Za Zhi* 2020;41(2):145-51. doi: 10.3760/cma.j.issn.0254-6450.2020.02.003 [published Online First: 2020/02/18]
14. Government Office for Science and Scientific Advisory Group for Emergencies. Guidance: The R number and growth rate in the UK. From Government Office for Science and Scientific Advisory Group for Emergencies. 2020 [updated Last updated 2 October 2020. Available from: <https://www.gov.uk/guidance/the-r-number-in-the-uk#contents> accessed 08/10/2020.

- 1  
2 15. Gov.uk. Coronavirus (COVID-19): Guidance and support. 2021 [Available from:  
3 <https://www.gov.uk/coronavirus> accessed 30 July 2021.
- 4  
5 16. Rubin D, Huang J, Fisher BT, et al. Association of Social Distancing, Population Density, and  
6 Temperature With the Instantaneous Reproduction Number of SARS-CoV-2 in Counties  
7 Across the United States. *JAMA network open* 2020;3(7):e2016099. doi:  
8 10.1001/jamanetworkopen.2020.16099 [published Online First: 2020/07/24]
- 9  
10 17. Li F, Li YY, Liu MJ, et al. Household transmission of SARS-CoV-2 and risk factors for susceptibility  
11 and infectivity in Wuhan: a retrospective observational study. *Lancet Infect Dis*  
12 2021;21(5):617-28. doi: 10.1016/s1473-3099(20)30981-6 [published Online First:  
13 2021/01/22]
- 14  
15 18. Mossong J, Hens N, Jit M, et al. Social contacts and mixing patterns relevant to the spread of  
16 infectious diseases. *PLoS Med* 2008;5(3):e74. doi: 10.1371/journal.pmed.0050074 [published  
17 Online First: 2008/03/28]
- 18  
19 19. PHE. COVID-19 vaccine surveillance report Week 30 Public Health England 2021.
- 20  
21 20. Le Bert N, Tan AT, Kunasegaran K, et al. SARS-CoV-2-specific T cell immunity in cases of COVID-19  
22 and SARS, and uninfected controls. *Nature* 2020;584(7821):457-62. doi: 10.1038/s41586-  
23 020-2550-z [published Online First: 2020/07/16]
- 24  
25 21. Widge AT, Roupael NG, Jackson LA, et al. Durability of Responses after SARS-CoV-2 mRNA-1273  
26 Vaccination. *The New England journal of medicine* 2021;384(1):80-82. doi:  
27 10.1056/NEJMc2032195 [published Online First: 2020/12/04]
- 28  
29 22. Mallapaty S. COVID vaccines slash viral spread - but Delta is an unknown. *Nature* 2021 doi:  
30 10.1038/d41586-021-02054-z [published Online First: 2021/07/30]
- 31  
32 23. Gov.uk. Slides and datasets to accompany coronavirus press conference: 5 June 2020. Published 5  
33 June 2020 ed, 2020.
- 34  
35 24. Prem K, Cook AR, Jit M. Projecting social contact matrices in 152 countries using contact surveys  
36 and demographic data. *PLoS Comput Biol* 2017;13(9):e1005697. doi:  
37 10.1371/journal.pcbi.1005697 [published Online First: 2017/09/13]
- 38  
39 25. Office for National Statistics. Dataset: 2018-based National population projections table of  
40 contents, 2018.
- 41  
42 26. Mahase E. Covid-19: What have we learnt about the new variant in the UK? *Bmj*  
43 2020;371:m4944. doi: 10.1136/bmj.m4944 [published Online First: 2020/12/29]
- 44  
45 27. Giordano G, Blanchini F, Bruno R, et al. Modelling the COVID-19 epidemic and implementation of  
46 population-wide interventions in Italy. *Nature medicine* 2020;26(6):855-60. doi:  
47 10.1038/s41591-020-0883-7 [published Online First: 2020/04/24]
- 48  
49 28. Gov.uk. Official Statistics. UK Biobank COVID-19 antibody study: round 1 results. : Department of  
50 Health & Social Care [Available from: <https://www.gov.uk/government/publications/uk-biobank-covid-19-seroprevalence-study-round-1-results/uk-biobank-covid-19-seroprevalence-study-round-1-results> accessed Published 30 July 2020. .
- 51  
52 29. Bingham K. The UK Government's Vaccine Taskforce: strategy for protecting the UK and the  
53 world. *Lancet* 2020 doi: 10.1016/s0140-6736(20)32175-9 [published Online First:  
54 2020/10/31]
- 55  
56 30. Department of Health & Social Care JCVI statement, August 2021: COVID-19 vaccination of  
57 children and young people aged 12 to 17 years.: Department of Health & Social Care 2021  
58 [Available from: <https://www.gov.uk/government/organisations/department-of-health-and-social-care>.
- 59  
60 31. Mahase E. Covid-19: UK approves Pfizer and BioNTech vaccine with rollout due to start next  
week. 2020;371:m4714. doi: 10.1136/bmj.m4714 %J BMJ

- 1  
2  
3  
4  
5  
6  
7  
8  
9  
10  
11  
12  
13  
14  
15  
16  
17  
18  
19  
20  
21  
22  
23  
24  
25  
26  
27  
28  
29  
30  
31  
32  
33  
34  
35  
36  
37  
38  
39  
40  
41  
42  
43  
44  
45  
46  
47  
48  
49  
50  
51  
52  
53  
54  
55  
56  
57  
58  
59  
60
32. PHE. COVID-19 vaccine surveillance report Week 28: Public Health England 2021.
  33. Hall ea. Effectiveness of BNT162b2 mRNA Vaccine Against Infection and COVID-19 Vaccine Coverage in Healthcare Workers in England, Multicentre Prospective Cohort Study (the SIREN Study). *Lancet (preprint)* 2021
  34. Ramsay M. COVID-19: analysing first vaccine effectiveness in the UK 2021 [updated 23 February 2021. Available from: <https://publichealthmatters.blog.gov.uk/2021/02/23/covid-19-analysing-first-vaccine-effectiveness-in-the-uk/>.
  35. Department of Health and Social Care. Optimising the covid-19 vaccination programme for maximum short-term impact. 2021 [Available from: <https://www.gov.uk/government/publications/prioritising-the-first-covid-19-vaccine-dose-icvi-statement/optimising-the-covid-19-vaccination-programme-for-maximum-short-term-impact>.
  36. Levine-Tiefenbrun M, Yelin I, Katz R, et al. Decreased SARS-CoV-2 viral load following vaccination. 2021:2021.02.06.21251283. doi: 10.1101/2021.02.06.21251283 %J medRxiv
  37. Emary KRW, Golubchik T, Aley PK, et al. Efficacy of ChAdOx1 nCoV-19 (AZD1222) Vaccine Against SARS-CoV-2 VOC 202012/01 (B.1.1.7). SSRN [Preprint]. 2021. DOI: 10.2139/ssrn.3779160. Available at: [https://papers.ssrn.com/sol3/papers.cfm?abstract\\_id=3779160](https://papers.ssrn.com/sol3/papers.cfm?abstract_id=3779160) 2021
  38. Liu QH, Ajelli M, Aleta A, et al. Measurability of the epidemic reproduction number in data-driven contact networks. *Proceedings of the National Academy of Sciences of the United States of America* 2018;115(50):12680-85. doi: 10.1073/pnas.1811115115 [published Online First: 2018/11/23]
