# Supplementary material for: Vaccination against COVID-19 and society’s return to normality in England: a modelling study of impacts of different types of naturally acquired and vaccine-induced immunity
Source: PubMed Central journal article supplement — BMJ Open. 2021 Nov 16;11(11):e053507. doi: 10.1136/bmjopen-2021-053507 (PMC8595291; doi:10.1136/bmjopen-2021-053507), 2021-11-16
Supplement: bmjopen-2021-053507supp001.pdf [file bmjopen-2021-053507supp001.pdf]

## **Supplementary files for:**

**Vaccination against COVID-19 and society's return to normality in England: a modelling investigation of different types of naturally acquired and vaccine induced immunity**

- 1. Model structure and status**
- 2. Data sources and model verification**
- 3. Projection scenarios**
- 4. Mathematical equations**
- 5. R-code used and related input data files**
- 6. References**

## 1. Model structure and status

This is a discrete-time population dynamic simulation model. Population in England are partitioned into discrete categories by sex (male or female), age (0-4, 5-9, then by 10 year age bands, and 80+), and Covid-19 infection categories. The main infection categories include: susceptible (SU), exposed (EX), infected (IN), and recovered (RE) (appendix figure 1). The infected individuals are further categorised as asymptomatic, symptomatic, self-isolated, and hospitalised.

**Appendix figure 1: Model structure and transmission across states**

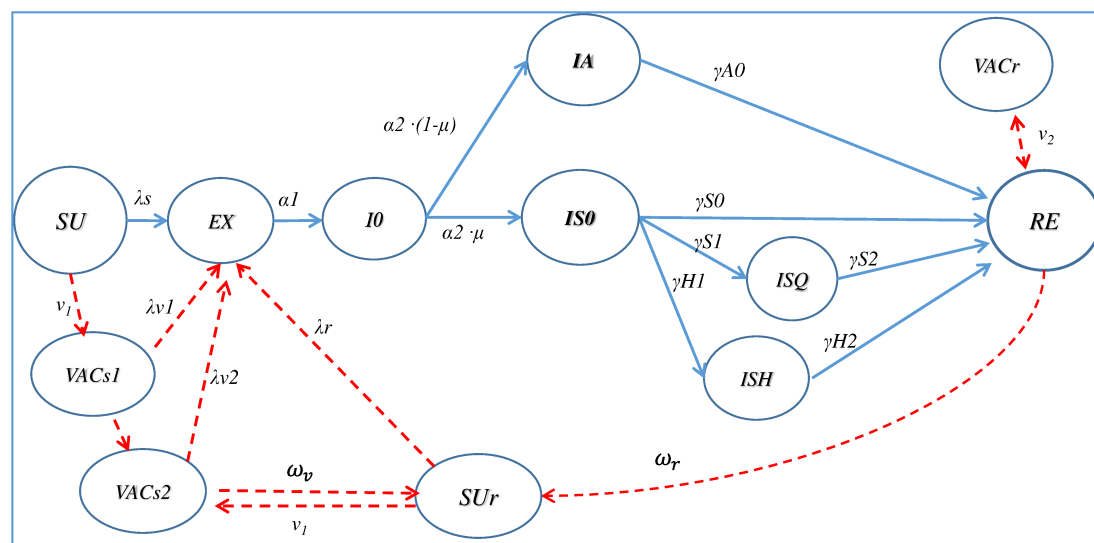

### Definitions of compartmental states in appendix figure 1

- SU: susceptible individuals
- SUr: Individuals susceptible to reinfection after immunity waning
- EX: exposed individuals, not infectious
- IO: infectious, before symptom onset
- IA: infectious individuals with no or very mild symptoms
- ISO: symptomatic patients who are not quarantined
- ISQ: symptomatic patients self-isolated
- ISH: symptomatic patients who are hospitalised
- RE: recovered from covid-19 infection
- VACs1: vaccinated (dose-1) susceptible individuals
- VACs2: vaccinated (dose-1) susceptible individuals
- VACr: vaccinated individuals who recovered from infection

### Transition parameters in appendix figure 1:

- $\lambda_s$ : Force of infection ( $\lambda$ ) measures the risk (probability) of infection transmission.

- $\lambda_{v1}$ : Force of infection ( $\lambda$ ) after the first dose vaccine.
- $\lambda_{v2}$ : Force of infection ( $\lambda$ ) after the second dose vaccine.
- $\lambda_r$ : Force of infection ( $\lambda$ ) after waning of vaccine-induced or naturally acquired immunity.
- $\alpha_1$ : rate of progressing from being exposed to being infectious.
- $\alpha_2$ : rate of progressing from being asymptomatic infectious to symptomatic.
- $\mu$ : proportion of infected individuals who will be symptomatic; age-specific
- $\gamma_{A0}$ : rate of recovering for asymptomatic individuals
- $\gamma_{S0}$  rate of recovering for symptomatic, not isolated/hospitalised patients
- $\gamma_{S1}$ : rate of being isolated in symptomatic patients
- $\gamma_{S2}$ : rate of recovering in isolated patients
- $\gamma_{H1}$ : rate of being hospitalised for symptomatic patients
- $\gamma_{H2}$ : rate of recovering in hospitalised patients
- $v_1$ : rate of vaccinating susceptible individuals
- $v_2$ : rate of vaccinating recovered individuals
- $w_v$ : rate of immunity waning in vaccinated individuals
- $w_r$ : rate of immunity waning in recovered individuals

All individuals in England are assumed to be susceptible to SARS-CoV-2 infection at the beginning of 2020. Susceptible individuals may be infected by contacting infectious individuals, and the infection status is changed from “susceptible” (SU) to “exposed” (EX). The exposed individuals are not infectious during the early incubation period, but start to be infectious before the onset of symptoms. Individuals infected with SARS-CoV-2 virus may have no or very mild symptoms (IA), and palpable symptoms (symptomatic or clinical infections). Asymptomatic individuals can spread SARS-CoV-2 virus before recovery, although the transmission risk may be lower than symptomatic patients. Symptomatic patients are further classified into three categories: symptomatic patients who are neither isolated nor hospitalised (IS0), those who self-isolate at home (ISQ), and those who are hospitalised (including those being admitted to intensive care units) (ISH). Symptomatic patients are infectious and can transmit the virus to susceptible people before being isolated, hospitalised or recovered. We assume that hospitalised patients (ISH) are well isolated and no longer able to spread the virus to the susceptible population, although infectious patients who are self-isolated at home (ISQ) may transmit virus to household contacts.

Individuals may recover from previous infection of SARS-CoV-2 (RE), and the susceptible and recovered individuals may be vaccinated with vaccines against SARS-CoV-2 virus (VAC1 and VAC2). Individuals recovered or effectively vaccinated may develop immune responses against infection with SARS-CoV-2. However, if the protective immunity is not long lasting, individuals who have recovered or vaccinated may become susceptible again after the waning of the immunity (SU<sub>r</sub>).

The immune response against COVID-19, either by naturally acquired from past SARS-CoV-2 infection or vaccine-induced, may be long lasting or short-lived. Immune response may reduce susceptibility of individuals to infection (infection protection, or sterilising, immunity), reduce disease severity after being infected (disease reduction immunity), and reduce infectivity of those who are reinfected after recovery or being vaccinated (reinfectivity reduction immunity).<sup>1</sup> According to existing evidence on immunological characteristics for other human coronaviruses, immunity against reinfection (sterilising immunity) may be waning in several months, while disease and reinfectivity reduction responses are likely long lasting.<sup>1</sup> According to these basic concepts specified by Lavine et al,<sup>1</sup> we incorporate the three types of immune responses into the model, to explicitly evaluate their impacts on future transmission dynamics (appendix figure 2).

### Appendix figure 2: Illustration of immune responses by natural infection or vaccination

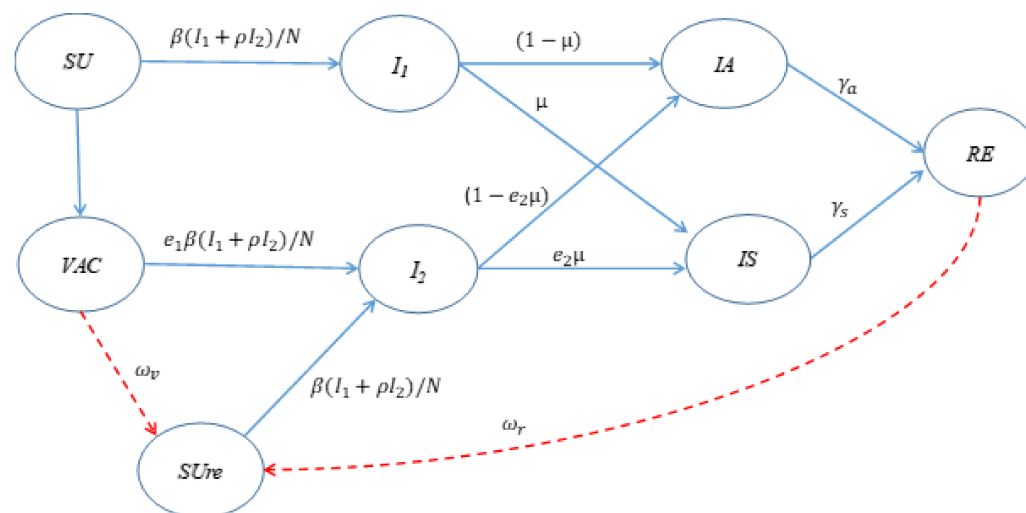

#### Notes to appendix figure 2:

- Appendix figure2 is a simplified version of appendix figure 1, not showing isolation and hospitalisation for symptomatic patients.
- $N$ : The number of the population
- $\beta$ : The transmission rate, i.e., the average number of individuals infected daily by an infectious person. It is a function of the number of daily close contacts per person ( $c$ ), and the transmission risk per contact between a susceptible and an infectious individual ( $\eta$ ): i.e.,  $\beta=c\cdot\eta$ .
- $I_1$ : Infectious individuals with primary infection
- $I_2$ : Infectious individuals with secondary infection (infected after being vaccinated or recovered)
- $\rho$ : Relative infectivity of the secondary infection ( $I_2$ ) compared with the primary infection ( $I_1$ ). For example, if  $\rho=0.6$ , the infectivity of  $I_2$  is 40% lower than the infectivity of  $I_1$
- $\mu$ : proportion of infected individuals who will be symptomatic; age-specific
- $e_1$ : Relative efficacy of vaccine for sterilising immunity, reducing risk of virus transmission

- $e_2$ : Relative efficacy of vaccine for pathology reduction, reducing the proportion of symptomatic cases after being infected
- $IA$ : Asymptomatic individuals
- $IS$ : Symptomatic patients
- $\gamma_a$ : Average rate of recovering of asymptomatic individuals
- $\gamma_s$ : Average rate of recovering of symptomatic individuals
- $w_v$ : rate of immunity waning in vaccinated individuals
- $w_r$ : rate of immunity waning in recovered individuals

### Overall and partial vaccine efficacy

Results of randomised controlled trials shown that vaccines may be >90% efficacious (e.g., Pfizer mRNA vaccine) in reducing severe symptomatic diseases, compared with the placebo group.<sup>2</sup> In appendix figure 2,  $e_1$  and  $e_2$  are parameters of vaccine's efficacy in blocking virus transmission and reducing symptomatic cases in the infected, respectively. The reduction in symptomatic cases in the vaccine group may be due to the prevention of infection in susceptible individuals (related to  $e_1$ ), or a lower proportion of infected individuals being symptomatic in the vaccine group (related to  $e_2$ ), or due to a combination of both (note:  $e_1$  and  $e_2 \geq 1$  - overall VE, and  $\leq 1$ ). Let  $\lambda$  is the transmission risk and  $\mu$  is the proportion of symptomatic cases in the infected without vaccination. After being vaccinated, the transmission risk is reduced to  $\lambda \cdot e_1$ , and the proportion of symptomatic cases reduced to  $\mu \cdot e_2$ . For a vaccine with 90% efficacy in reducing the number of symptomatic cases (compared with the control group), it should be true that  $e_1 \cdot e_2 = (1 - 0.90)$ , or  $e_1 = 0.10 / e_2$ . There are many different possible combinations of  $e_1$  and  $e_2$  for a given overall efficacy in reducing symptomatic cases. For example,  $e_1 = e_2 = \text{SQRT}(0.30) = 0.548$  corresponds to a 70% efficacy of vaccine with equal sterilising immunity and pathology reduction. If  $e_1 = 1$  (i.e., zero efficacy in sterilising immunity), all vaccine efficacy will be attributable to the pathology reduction, with  $e_2 = 0.30$ , for a vaccine with 70% efficacy. The partial efficacy is calculated using:  $E_i = 1 - (1 - E_o) / E_d$ , where  $E_i$  is the partial efficacy for infection protection,  $E_d$  is the partial efficacy for disease reduction, and  $E_o$  is the overall vaccine efficacy. The equal partial efficacy is calculated by:  $E_i = E_d = 1 - \sqrt{(1 - E_o)}$ . For vaccines with 90%, 70% and 50% overall efficacy, the equal partial efficacy for the infection protection and disease reduction is 69.4%, 45.2%, and 29.3%, respectively.

## 2. Parameterisation, data sources, and simulation scenarios

### 2.1 Transition parameters and distribution of infectious period

In appendix figure 1, force of infection ( $\lambda$ ) measures the risk of infection,<sup>3</sup> which is a function of transmission rate ( $\eta$ ) and the prevalence of existing infectious individuals ( $I$ ) among the population ( $N$ ):  $\lambda = \eta \cdot I/N$ . The transmission rate  $\eta$  in the discrete-time model can be defined as the average number of new infected individuals generated daily by an infected person. That is,  $\eta = Rt/T$ , in which  $Rt$  is effective reproduction number and  $T$  is the average infectious period for infected individuals. We calculated  $\eta$  as a function of the number of daily contacts per person ( $c$ ), and the risk of transmission per contact between a susceptible and an infected individual ( $\beta$ ):  $\eta = c \cdot \beta$ .<sup>4</sup>

The transition rate between model's compartments in infectious models is often assumed to be constant, calculated by  $1/x$ , in which "x" is the average period that subjects remain before the transition to the model's next compartments.<sup>3</sup> Therefore, the infectious period in standard SIR or SEIR models is usually assumed to be exponentially distributed, with some limitations of the use of exponentially distributed infectious period.<sup>5 6</sup> In this study, we assumed that the transition probability between model's compartments are based on gamma distributed periods that individuals remain in a compartment.<sup>7</sup> The transition probability ( $y$ ) at  $t$  is:  $y_t = (cg_t - cg_{t-1}) / (1 - cg_t)$ , where  $cg_t$  is the gamma cumulative probability by the end of  $t$ . Given mean and shape ( $k$ ) parameters, the gamma distribution based transition probability is used as a deterministic value to estimate the number of individuals moving between two status in this study.

### 2.2 Parameterisation and data sources

We estimated initial parameters based on relevant literature and data from the UK government websites (appendix table 1). Key parameters were calibrated according to the reported numbers of covid-19 deaths, hospitalised patients, and the prevalence of infected individuals in England from January 2020 to June 2021.<sup>8</sup>

Appendix table 1: Summary of key model parameters and data sources

| Parameter                                                                     | Value                  |                       |                       | Source and notes                                                                          |
|-------------------------------------------------------------------------------|------------------------|-----------------------|-----------------------|-------------------------------------------------------------------------------------------|
| <b>Proportion of asymptomatic cases in infected individuals (%)</b>           |                        |                       |                       |                                                                                           |
| Age: 0-9                                                                      | 0.71                   |                       |                       | Davis et al. <sup>9</sup>                                                                 |
| 10-19                                                                         | 0.79                   |                       |                       |                                                                                           |
| 20-29                                                                         | 0.73                   |                       |                       |                                                                                           |
| 30-39                                                                         | 0.67                   |                       |                       |                                                                                           |
| 40-49                                                                         | 0.60                   |                       |                       |                                                                                           |
| 50-59                                                                         | 0.51                   |                       |                       |                                                                                           |
| 60-69                                                                         | 0.37                   |                       |                       |                                                                                           |
| 70+                                                                           | 0.31                   |                       |                       |                                                                                           |
| <b>Proportion of self-isolated symptomatic cases who are not hospitalised</b> |                        |                       |                       |                                                                                           |
| <b>Age:</b>                                                                   | <b>0-49</b>            | <b>50-69</b>          | <b>70+</b>            | Assumed by authors, and calibrated according to reported COVID-19 deaths.                 |
| Before 13/03/2021                                                             | 0.10                   | 0.10                  | 0.10                  |                                                                                           |
| 13/03-23/03/2020                                                              | 0.40                   | 0.60                  | 0.80                  |                                                                                           |
| After 24/03/2020                                                              | 0.80-0.90              | 0.80-0.95             | 0.90-0.95             |                                                                                           |
| <b>Estimated values of gamma distributed parameters (mean, shape k)</b>       |                        |                       |                       |                                                                                           |
|                                                                               | <b>Before 12/03/20</b> | <b>13/03-23/03/20</b> | <b>After 23/03/20</b> | Zhang et al. <sup>10</sup><br>Davies et al. <sup>7</sup><br>Ferguson et al. <sup>11</sup> |
| Duration from exposed to being preclinical infectious (day)                   | 4.0 (4)                | 4.0 (4)               | 4.0 (4)               |                                                                                           |
| Duration of preclinical infectious (day)                                      | 1.5 (2)                | 1.5 (2)               | 1.5 (2)               |                                                                                           |
| Infectious period before recovery (day)                                       | 5.0 (5)                | 5.0 (5)               | 5.0 (5)               |                                                                                           |
| Infectious period before being isolated (day)                                 | 4.0 (4)                | 3.0 (3)               | 2.0 (2)               |                                                                                           |
| Infectious period during isolation at home (day)                              | 2.0 (2)                | 3.0 (3)               | 4.0 (4)               |                                                                                           |
| Infectious period before being hospitalised (day)                             | 4.0 (4)                | 3.0 (3)               | 2.0 (2)               |                                                                                           |
| Duration of hospitalisation (day)                                             | 10.0 (10)              | 10.0 (10)             | 10.0 (10)             | Verity et al. <sup>12</sup>                                                               |
| Delay from being infected to deaths from Covid-19 (day)                       | 23.0 (23)              | 23.0 (23)             | 23.0 (23)             |                                                                                           |
| <b>Case fatality rates (%)</b>                                                |                        |                       |                       |                                                                                           |
| Age: 0-9                                                                      | 0.0026                 |                       |                       | Verity et al. <sup>12</sup> ;<br>Chinese CDC <sup>13</sup>                                |
| 10-19                                                                         | 0.0148                 |                       |                       |                                                                                           |
| 20-29                                                                         | 0.0600                 |                       |                       |                                                                                           |
| 30-39                                                                         | 0.1460                 |                       |                       |                                                                                           |
| 40-49                                                                         | 0.2950                 |                       |                       |                                                                                           |
| 50-59                                                                         | 1.2500                 |                       |                       |                                                                                           |
| 60-69                                                                         | 3.9900                 |                       |                       |                                                                                           |
| 70-79                                                                         | 8.6100                 |                       |                       |                                                                                           |
| 80+                                                                           | 13.400                 |                       |                       |                                                                                           |
| <b>Age specific rates of hospitalisation among infected individuals</b>       |                        |                       |                       |                                                                                           |
| 0-9                                                                           | 0.010%                 |                       |                       | Verity et al. <sup>12</sup>                                                               |
| 10-19                                                                         | 0.041%                 |                       |                       |                                                                                           |
| 20-29                                                                         | 1.04%                  |                       |                       |                                                                                           |
| 30-39                                                                         | 3.43%                  |                       |                       |                                                                                           |
| 40-49                                                                         | 4.25%                  |                       |                       |                                                                                           |
| 50-59                                                                         | 8.16%                  |                       |                       |                                                                                           |
| 60-69                                                                         | 11.8%                  |                       |                       |                                                                                           |

|                                                                                                                                                                                                                                       |                                                                                                                                                                                                                   |                                                                                                                                           |              |            |                                                                                                                                                                                                                           |
|---------------------------------------------------------------------------------------------------------------------------------------------------------------------------------------------------------------------------------------|-------------------------------------------------------------------------------------------------------------------------------------------------------------------------------------------------------------------|-------------------------------------------------------------------------------------------------------------------------------------------|--------------|------------|---------------------------------------------------------------------------------------------------------------------------------------------------------------------------------------------------------------------------|
| 70-79                                                                                                                                                                                                                                 | 16.6%                                                                                                                                                                                                             |                                                                                                                                           |              |            |                                                                                                                                                                                                                           |
| 80+                                                                                                                                                                                                                                   | 18.4%                                                                                                                                                                                                             |                                                                                                                                           |              |            |                                                                                                                                                                                                                           |
| <b>SARS-CoV-2 transmission related parameters</b>                                                                                                                                                                                     |                                                                                                                                                                                                                   |                                                                                                                                           |              |            |                                                                                                                                                                                                                           |
| Initial importing of infected cases                                                                                                                                                                                                   | The first exposed case was imported to England on 15 January, and the daily number of infectious cases imported was increased by one until 9 February 2020, with a total number of 351 cases imported in 25 days. | Assumed by authors and calibrated with the observed number of covid-19 deaths in England.                                                 |              |            |                                                                                                                                                                                                                           |
| the risk of transmission per contact between a susceptible and an infected individual ( $\beta$ )                                                                                                                                     | Before any NPI measures: 0.094<br>NPI measures (03/2020): 0.066<br>Alpha variant (10/2020-): 0.077<br>Delta variant (06/2021-): 0.081                                                                             | Calibrated according to changes in reported R values, <sup>14</sup> NPI policies <sup>15</sup> and reported covid-19 deaths. <sup>8</sup> |              |            |                                                                                                                                                                                                                           |
| Seasonal changes in transmission risk (09/2021-12/2024)                                                                                                                                                                               | 10% higher in September, October, March and April, and 20% higher in November, December, January and February, compared with the risk in summer months from May to August.                                        | Literature (e.g., <sup>16</sup> ) and authors' assumptions.                                                                               |              |            |                                                                                                                                                                                                                           |
| Transmission risk by asymptomatic individuals                                                                                                                                                                                         | 21% of the transmission risk by symptomatic cases                                                                                                                                                                 | Li et al. <sup>17</sup>                                                                                                                   |              |            |                                                                                                                                                                                                                           |
| <b>Assumed impacts of NPIs on general contacts in England. Notes:</b><br>Notes: Values are scaling fractions to reduce the normal contacts. For example, a fraction of 0.80 means the contacts are reduced by 20%.                    |                                                                                                                                                                                                                   |                                                                                                                                           |              |            |                                                                                                                                                                                                                           |
| <b>Age group</b>                                                                                                                                                                                                                      | <b>0-19</b>                                                                                                                                                                                                       | <b>20-59</b>                                                                                                                              | <b>60-69</b> | <b>70+</b> | The sex-and-age-specific numbers of daily contacts per person from Mossong et al. <sup>18</sup> Calibrated according to covid-19 control restrictions <sup>15</sup> and reported covid-19 deaths in England. <sup>8</sup> |
| Before 13/3/2020                                                                                                                                                                                                                      | 1.00                                                                                                                                                                                                              | 1.00                                                                                                                                      | 1.00         | 1.00       |                                                                                                                                                                                                                           |
| 13/03/2020-                                                                                                                                                                                                                           | 0.90                                                                                                                                                                                                              | 0.80                                                                                                                                      | 0.70         | 0.60       |                                                                                                                                                                                                                           |
| 17/03/2020-                                                                                                                                                                                                                           | 0.80                                                                                                                                                                                                              | 0.70                                                                                                                                      | 0.60         | 0.50       |                                                                                                                                                                                                                           |
| 24/03/2020-                                                                                                                                                                                                                           | 0.40                                                                                                                                                                                                              | 0.30                                                                                                                                      | 0.20         | 0.15       |                                                                                                                                                                                                                           |
| 05/07/2020-                                                                                                                                                                                                                           | 0.60                                                                                                                                                                                                              | 0.55                                                                                                                                      | 0.40         | 0.20       |                                                                                                                                                                                                                           |
| 01/09/2020-                                                                                                                                                                                                                           | 0.80                                                                                                                                                                                                              | 0.60                                                                                                                                      | 0.50         | 0.30       |                                                                                                                                                                                                                           |
| 05/11/2020-                                                                                                                                                                                                                           | 0.60                                                                                                                                                                                                              | 0.30                                                                                                                                      | 0.20         | 0.15       |                                                                                                                                                                                                                           |
| 02/12/2020-                                                                                                                                                                                                                           | 0.70                                                                                                                                                                                                              | 0.60                                                                                                                                      | 0.50         | 0.30       |                                                                                                                                                                                                                           |
| 05/01/2021-                                                                                                                                                                                                                           | 0.40                                                                                                                                                                                                              | 0.30                                                                                                                                      | 0.20         | 0.15       |                                                                                                                                                                                                                           |
| 08/03/2021-                                                                                                                                                                                                                           | 0.80                                                                                                                                                                                                              | 0.60                                                                                                                                      | 0.50         | 0.30       |                                                                                                                                                                                                                           |
| 01/05/2021                                                                                                                                                                                                                            | 0.90                                                                                                                                                                                                              | 0.80                                                                                                                                      | 0.70         | 0.60       |                                                                                                                                                                                                                           |
| 19/07/2021-                                                                                                                                                                                                                           | 1.00                                                                                                                                                                                                              | 1.00                                                                                                                                      | 1.00         | 1.00       |                                                                                                                                                                                                                           |
| <b>Vaccine relative efficacy in reducing symptomatic cases</b><br>Notes: We assume that vaccine efficacy for reducing symptomatic cases is equally attributable to infection reduction and disease reduction in the main projections. |                                                                                                                                                                                                                   |                                                                                                                                           |              |            |                                                                                                                                                                                                                           |
| 14 days after the first dose                                                                                                                                                                                                          | 62.5%                                                                                                                                                                                                             |                                                                                                                                           |              |            | Public Health England <sup>19</sup>                                                                                                                                                                                       |
| After the second dose                                                                                                                                                                                                                 | 85.0%                                                                                                                                                                                                             |                                                                                                                                           |              |            |                                                                                                                                                                                                                           |
| Long-term efficacy after revaccination                                                                                                                                                                                                | 62.5%, 85.0%                                                                                                                                                                                                      |                                                                                                                                           |              |            | Public Health England, <sup>19</sup> and authors' assumption.                                                                                                                                                             |
| Durability of naturally acquired sterilising immunity                                                                                                                                                                                 | 365 or 730 days                                                                                                                                                                                                   |                                                                                                                                           |              |            | Lavine et al, <sup>1</sup> Le Bert et al, <sup>20</sup> Widge et al. <sup>21</sup>                                                                                                                                        |
| Durability of vaccine-induced sterilising immunity                                                                                                                                                                                    | 182 or 365 days                                                                                                                                                                                                   |                                                                                                                                           |              |            |                                                                                                                                                                                                                           |
| Durability of immunity against severe disease after re-infection                                                                                                                                                                      | >4 years                                                                                                                                                                                                          |                                                                                                                                           |              |            |                                                                                                                                                                                                                           |
| Reduction in reinfectivity (transmission risk) in vaccinated or recovered individuals                                                                                                                                                 | 30%, 45% or 60%                                                                                                                                                                                                   |                                                                                                                                           |              |            | Mallapaty et al, <sup>22</sup> PHE. <sup>19</sup>                                                                                                                                                                         |



| <b>Vaccination programme related parameters</b>                                                                                                                                                      |                                                                                                                                                         |                                                                     |
|------------------------------------------------------------------------------------------------------------------------------------------------------------------------------------------------------|---------------------------------------------------------------------------------------------------------------------------------------------------------|---------------------------------------------------------------------|
| Notes: The mass vaccination is modelled as an age-based phase approach, starting from people aged $\geq 70$ , followed by individuals aged 60-69, 50-59, 30-49, and then those aged 16-29 years old. |                                                                                                                                                         |                                                                     |
| Maximum number of vaccinated individuals per day in England                                                                                                                                          | 180,000                                                                                                                                                 | According to data on numbers of vaccinated individuals <sup>8</sup> |
| Interval between the first and second vaccine dose                                                                                                                                                   | 9 weeks                                                                                                                                                 | PHE <sup>19</sup>                                                   |
| Vaccination coverage                                                                                                                                                                                 | 75%, 80%, 85% and 90%, respectively, in adults aged 16-29, 30-39, 40-49, and $\geq 50$ years old.                                                       | Reported vaccination data <sup>8 19</sup> and authors' assumption.  |
| Vaccination coverage sensitivity analyses                                                                                                                                                            | Lower (60%, 70%, and 80%) and higher (80%, 85%, and 90%) in people aged 16-29, 30-39, and 40-49 years old, respectively.                                | Authors' assumptions.                                               |
| Frequency of revaccination programmes                                                                                                                                                                | Number of (days between) repeated vaccination programmes during 2021-2024:<br>1 (...), 2 (365), 3 (365);<br>2 (730), 3 (487), 4 (365), 5 (292), 6 (243) | Authors' assumption                                                 |
|                                                                                                                                                                                                      |                                                                                                                                                         |                                                                     |
|                                                                                                                                                                                                      |                                                                                                                                                         |                                                                     |

We obtained population statistics in England (estimates of mid-year 2020) from Office for National Statistics. It was assumed that all individuals in England were susceptible to SARS-CoV-2 infection at the beginning of 2020. By contacting with infectious individuals, susceptible individuals may be infected, and their infection category is changed from “susceptible” (SU) to “exposed” (EX). “Exposed” refers to the pre-infectious status of infected individuals. According to data from previous studies, the period of incubation before symptom onset was on average 5.5 days,<sup>10</sup> and the exposed individuals start to be infectious about 1.5 days before the onset of symptoms.<sup>7 11</sup> Therefore, we assumed a gamma distribution of incubation period, with a mean non-infectious period of 4 days ( $k=4.0$ ) after being exposed, and a mean infectious period of 1.5 days ( $k=2$ ) before symptom onset (appendix table 1).

Individuals infected with SARS-CoV-2 virus may have no or very mild symptoms (asymptomatic infected), and palpable symptoms (symptomatic patients). As in previous modelling studies<sup>7 11</sup>, it was assumed that asymptomatic individuals can spread SARS-CoV-2 virus before recovery, although the infectious risk was assumed to be 21% of symptomatic patients.<sup>17</sup> We used age-specific rates of asymptomatic cases in the infected individuals, reported in a study based on data from 6 countries (appendix table 1).<sup>9</sup>

Symptomatic patients are further classified into three categories: symptomatic patients who are neither isolated nor hospitalised (mainly at the initial phase of the epidemic), those who are self-isolated at home, those who are hospitalised (see appendix figure 1). We assume that asymptomatic individuals were not isolated, although the average number of daily contacts could be reduced by non-pharmaceutical interventions (NPIs), including social distancing, testing, contact tracing, and lockdown. Assumed proportions of self-isolation of symptomatic cases who are not hospitalised, depending on age and NPI measures are shown in appendix table 1.

We assume that only symptomatic patients are hospitalised, and age specific rates of hospitalisation among symptomatic individuals were from Verity et al.<sup>12</sup> The hospitalisation rates were calibrated according to reported numbers of hospitalised patients with covid-19 in England.<sup>23</sup> Based on the reported number of hospitalised patients and estimated number of symptomatic cases, the hospitalisation rate was estimated to be 70% lower than the estimated by Verity et al.<sup>12</sup> Symptomatic patients are infectious and can transmit the virus to susceptible people before being hospitalised or isolated. We assume that hospitalised patients are no longer able to spread the virus to susceptible individuals in the community. However, infected individuals who are self-isolated at home may transmit virus to household contacts. The infectious period before recovery was assumed to be gamma distributed, with a mean value of 5 days. Before implementing any NPIs, the infectious period of symptomatic cases was of a mean value of 4 days ( $k=4$ ) before being quarantined or hospitalised. After implementing NPI measures, the infectious period for isolated and hospitalised patients was reduced, having a mean value of 2 days ( $k=2$ ). The mean hospital stay was assumed to be 10 days ( $k=10$ ) (including ICU admitted patients) (appendix table 1). Verity et al estimated that the average duration from symptom onset to death was 17.8 days.<sup>12</sup> Therefore, we assume that covid-19 related deaths occur on average 23 days ( $k=23$ ) after being exposed/infected.

The simulation starts from 1 January 2020, over a period of five years until the end of 2024. We assume that the first exposed case was imported to England on January 15th 2020, and the daily number of infectious cases imported was increased by one until 9 February 2020, with a total number of 351 cases imported in 25 days. The sex-and-age-specific numbers of household and community daily contacts per person in the UK were obtained from a study in 8 European countries.<sup>18 24</sup> For the purpose of simplicity, we considered only household contacts (relevant to self-isolation at home) and general daily contacts (for all types of contacts). The risk of positive transmission per contact between susceptible and infectious individuals ( $\beta$ ) was estimated by calibrating estimated and reported numbers of covid-19 deaths in England, household and general daily contacts per person, and other model parameters.

In this study, all COVID-19 related deaths are assumed to be from symptomatic cases, and age specific case fatality rates were based on a study by Verity et al.<sup>12</sup> We assume that individuals infected with Covid-19 will not die from other causes before recovery. Average sex and age specific rates of all-cause deaths in England during 2015-2019<sup>25</sup> were applied to people who are not infected with or recovered from covid-19. For simplicity and maintaining a stable population, we assumed that the number of births at day  $t$  equals to the number of all deaths at day  $t-1$ . Furthermore, we did not consider the influence of migration on the population. We adjusted the number of individuals belong to an age group (all <80+) at the beginning of the year since 2021 by shifting 20% (for age group 0-4 and 5-9) or 10% (for age group 10-19, ... 70-79) of them to the adjacent higher age group.

## **NPI and seasonal impacts on transmission parameters**

Since March 2020, NPI measures were recommended and gradually tightened in England, including hand washing, mouth covering when coughing in public places, home isolation of individuals with COVID-19 like symptoms, shielding of vulnerable individuals, avoiding non-essential contacts, and maintaining social distancing. These measures reduced contacts and transmission risk, and shortened the period of transmission by symptomatic individuals. We assumed that the general population's contact rates were reduced by 10% to 40%, depending on age and co-morbidity. Based on the reported number of COVID-19 deaths, we estimate that the transmission risk per contact between infectious and susceptible individuals was reduced from  $\beta=0.094$  before the implementation of any NPIs to 0.069 by 15 March 2020 and 0.062 since May 2020. The UK government put lockdown measures in place from 24 March 2020, including working from home if possible, closure of schools and non-essential shops, pubs and restaurants, avoiding non-essential travelling, and cancelling gathering activities. We assume that numbers of general population contacts were reduced by 60-85% (appendix table 1). We assume that the household contacts were not influenced by the NPI measures.

The lockdown measures in England started to be relaxed from 13 May 2020 by allowing partial returning to work. Further relaxing of control measures followed, including reopening of some shops and allowing outdoor meetings up to six people from 1 June, re-opening of more non-essential shops from 5 June, and further relaxing of restrictions (such as re-opening of pubs and restaurants) from 5 July 2020. However, social distancing measures was maintained and face covering was required where social distancing could not be implemented. From 1 September 2020, schools in England were re-opening. Consequently, the transmission risk per contact between susceptible and infectious individuals was increased since September. The impacts of these changes in NPIs were reflected in the assumed social contacts and transmission risk. Because of the new virus variants,<sup>26</sup> the average transmission risk per contact was increased  $\beta=0.077$  since October 2020, and  $\beta=0.081$  since June 2021.

To incorporate the impact of seasonality on future projections, we assumed that the transmission risk is increased by 10% in September, October, March and April, and increased by 20% in November, December, January and February.

## **Model verification/calibration**

We used the developed model and initially estimated parameters to simulate the covid-19 epidemic in England from January 2020 to June 2021. Key parameters were calibrated based mainly on reported covid-19 related deaths, although numbers of hospitalised patients and infection rates in England were also considered.

We assume that the first exposed case was imported to England on 15 January 2020, and the number of cases imported each day increased by one more case than the previous day until 9 February 2020 (the total number of cases imported in 25 days was therefore 351). We don't use the reproduction number

( $R_0$  or  $R_t$ ) as an input parameter, but derived the reproduction numbers based on a method used by Giordano and colleagues (see equation 55 in Mathematical equations)<sup>3 27</sup>. We estimated that the basic reproduction number ( $R_0$ ) was 3.63 at the initial stage of the COVID-19 epidemic before any control measures were taken in England, which is similar to findings from previous studies.<sup>7 11</sup> Following the implementation of NPI measures, the estimated reproduction value ( $R_t$ ) was reduced to 0.65 by 24 March. The  $R_t$  value was increased to 0.93 by 5 July 2020 after the NPI measures were relaxed, and  $R_t$  was about 1.09 after school reopening in September and 1.31 by October 2020. The  $R_t$  was reduced to 0.79 since 5 November 2020 after reintroducing NPI measures, increased to about 1.17 after relaxing NPIs since 2 December 2020, and reduced again to about 0.57 since 5 January 2021 after reintroducing lockdown measures (plus rolling out of vaccination) (appendix figure 3). The estimated  $R$  values were within the range of the reported in England (<https://coronavirus.data.gov.uk/>).

### Appendix figure 3: Estimated reproduction numbers, between 01/2020 – 06/2021, in England

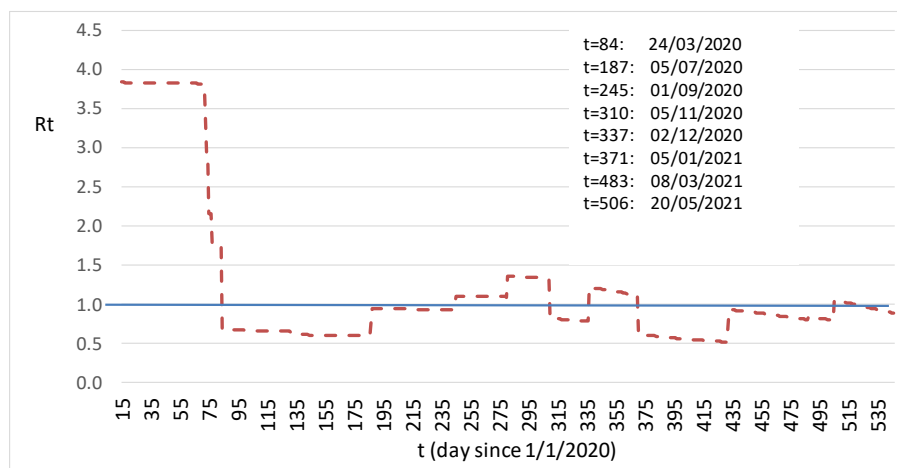

The model estimated that the prevalence of the recovered was 5.5 by 26 April, 7.6% by 24 May, and 8.5% by 24 June 2020, which were similar to the estimated rates of positive antibodies to Covid-19 in the UK (i.e., 7.1% in May-June 2020).<sup>28</sup> Data on the prevalence of infected individuals in the community was available from May 2020. The model estimated prevalence of infected individuals from January 2020 to January 2021, which had a similar trend as the reported prevalence in England (appendix figure 4).

**Appendix figure 4: Estimated and reported prevalence of infection, from January 2020 to June 2021, in England**

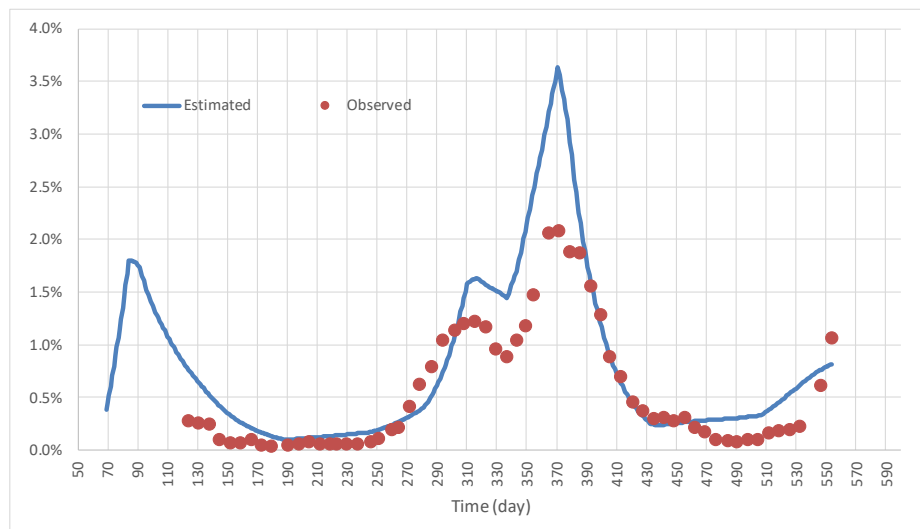

Changes in the estimated numbers of hospitalised COVID-19 patients were of similar trends as the reported numbers of hospitalised patients during 01/2020-01/2021. However, there were considerable differences at peak time points (appendix figure 5), which may be explained by reduced hospitalisation rates during peak period.

**Appendix figure 5: Reported and estimated numbers of hospitalised Covid-19 patients, during 01/2020-01/2021, in England**

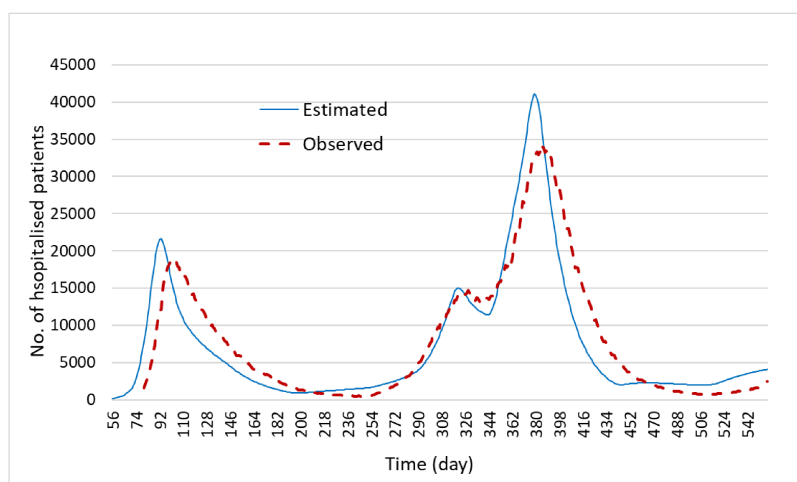

Appendix figure 6 shows that the estimated daily deaths well matched the observed daily deaths from Covid-19, from January 2020 to June 2021, in England.

**Appendix figure 6: Reported and estimated daily deaths from Covid-19, during 01/2020-06/2021, in England**

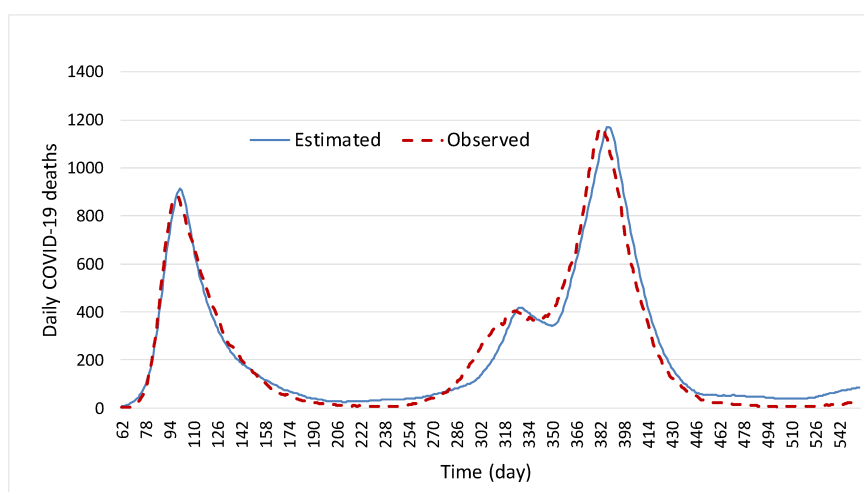

### 3. Vaccination and projection scenarios

We used estimates of transmission parameters, age-specific hospitalisation rates and case fatality rates in June 2021 to project COVID-19 deaths from 2021 to 2024, under various scenarios of vaccine efficacy, durability of both naturally acquired and vaccine induced immunity, and reduction in reinfectivity. There are no more restrictions on social activities since 19 July 2021 in England, and social contacts are return to normal as before the pandemic, but basic hygienic measures would be maintained.

The UK Government's Vaccination Taskforce has recommended rollout of vaccines against COVID-19 to be prioritised primarily by age and comorbidity, with older people being vaccinated first.<sup>29</sup> The Joint Committee on Vaccination and Immunisation (JCVI) in the UK previously recommended COVID-19 vaccination of individuals aged  $\geq 18$ , and also recommended vaccination of young people aged 16-17 years old on 4 August 2021.<sup>30</sup> Vaccination of prioritised individuals began from 8 December 2020 in the UK and around 2 million individuals were vaccinated (mostly with a single dose of Pfizer vaccine) by 10 January 2021.<sup>31</sup> By July 2021, the coverage of individuals who were fully vaccinated (with two doses) was  $>90\%$  in adults aged  $\geq 65$ , 80-90% in those aged 50-64, 60% in adults aged 40-49.<sup>32</sup> For young adults aged 18-39, about 36% have received the first dose of vaccines by July 2021. Therefore, the vaccination coverage in England has been high in older adults, but it remains uncertain whether such high coverage could be achieved in younger adults. In this study, the mass vaccination is modelled as an age-based phase approach, starting from people aged  $\geq 70$ , followed by individuals aged 60-69, 50-59, 30-49, and then those aged 16-29. We assume that the mass vaccination starts from 1 January 2021, and the maximum number of individuals vaccinated per day is 180,000 in England, to matched with numbers of vaccinated individuals according to the official statistics. In the main analysis, we assume that the uptake rate is 75%, 80%, 85% and 90%, respectively, in adults aged 16-29, 30-39, 40-49, and  $\geq 50$  years old. Because of uncertain coverage of vaccination in younger people, we conducted sensitivity analyses under scenarios with lower (60%, 70%, and 80%) and higher (80%, 85%, and 90%) coverage of vaccination in people aged 16-29, 30-39, and 40-49 years old, respectively.

Results of randomised controlled trials shown that vaccines may be  $>90\%$  efficacious (e.g., Pfizer mRNA vaccine) in reducing severe symptomatic diseases, compared with the placebo group. Assume that  $e_1$  and  $e_2$  are parameters of vaccine's efficacy in blocking virus transmission and reducing symptomatic cases in the infected, respectively (as in appendix figure 2). The reduction in symptomatic cases in the vaccine group may be due to the prevention of infection in susceptible individuals (i.e., infection protection, related to  $e_1$ ), or a lower proportion of infected individuals being symptomatic in the vaccine group (i.e., disease reduction, related to  $e_2$ ), or due to a combination of both. For a vaccine with 90% efficacy in reducing the number of symptomatic cases (compared with the control group), it is true that  $e_1 e_2 = (1 - 0.90)$ , or  $e_1 = (1 - 0.90) / e_2$  (note:  $e_1$  and  $e_2 \geq 1$  - overall VE,  $\leq 1$ ). There are many different possible combinations of  $e_1$  and  $e_2$  for an overall efficacy in reducing symptomatic cases. We assume that vaccine efficacy is equally attributable to infection and disease reduction in the main

projections. The infection protection (sterilising immunity) after vaccination has been demonstrated. For example, an observational study in the UK (SIREN) found that the risk of being infected was reduced by 70% in health workers after a single dose of the Pfizer-BioNTech vaccine.<sup>33,34</sup>

Both Pfizer-BioNTech and AstraZeneca vaccines are 2-dose regimens, the policy in the UK has been to initially provide the first dose to as many individuals as possible to maximise the public health impact.<sup>35</sup> Exploratory assessment of data from clinical trials found that the short-term vaccine efficacy from the first dose of the Pfizer-BioNTech vaccine and the AstraZeneca vaccine is about 90% and 70%, respectively.<sup>35</sup> Public Health England (PHE) in July 2021 estimated that the efficacy was 55-70% after the first dose, and 70-85% or 85-95% after the second dose.<sup>32</sup> Therefore, we assume that the overall vaccine efficacy is 62.5% after the first dose and 85% after the second dose. The protection effects start 14 days after the first dose vaccination, and the interval between the first and second dose is 9 weeks. For vaccines with 62.5% and 85.0% overall efficacy, the equal partial efficacy for the infection protection and for disease reduction is 38.8% and 61.3%, respectively. The overall vaccine efficacy after the second dose may be lower than 85.0% due to new variants of SARS-CoV-2 virus. Therefore, we evaluated two overall vaccine efficacy rates, 62.5% or 85.0%, after the second dose of vaccine.

Available evidence has indicated that the duration of sterilising (infection protection) immunity after coronavirus infection ranges from 0.5 to two years.<sup>1</sup> Serum neutralizing antibodies were detected in all participants at four months follow up after SAR-CoV-2 mRNA vaccination.<sup>21</sup> Therefore, we assume that naturally acquired sterilising immunity lasts for 365 or 730 days, and vaccine-induced sterilising immunity lasts for 182 or 365 days. After waning of sterilising immunity, individuals may be susceptible again to infection with SARS-CoV-2 virus, but the disease reduction immunity is likely longer lasting.<sup>1</sup> Due to the existence of disease reduction immunity, the reinfectivity of individuals who are reinfected after waning of sterilising immunity may be reduced. Lavine and colleagues estimated that the secondary transmissibility (i.e., reinfectivity) was 35% of the primary transmissibility (i.e., the reinfectivity was reduced by 65%).<sup>1</sup> Evidence from clinical trials and vaccination in the real world indicated that the viral loads and the duration of virus shedding in the infected individuals after vaccination were considerably reduced, compared with unvaccinated individuals.<sup>36,37</sup> Based on preliminary data, PHE estimated that the reinfectivity was reduced by 35-50% after the first dose of vaccines.<sup>32</sup> The reduction in reinfectivity is likely to be larger after the second dose of vaccines. More recent studies reported that fully vaccinated individuals who were infected were up to 78% less likely to transmit the virus to unvaccinated individuals.<sup>22</sup> Therefore, we assume a range of the risk of reinfectivity after waning of sterilising immunity; the reinfectivity is reduced by 30%, 45% or 60%. We also assume that the infectivity of ineffectively vaccinated individuals is the same as recovered individuals whose sterilising immunity has waned, and that vaccination of individuals recovered from natural infection boosts their naturally acquired immunity.



We considered different frequent scenarios of revaccination programmes. First, we evaluated a single vaccination programme and multiple (2-4) annual vaccination programmes during 2021-2024. In addition, simulation projections were conducted by revaccination programmes with different intervals, including 2-6 revaccination programme and corresponding intervals between them.

In summary, projection scenarios are defined from the following aspects: vaccine efficacy, frequency of revaccination programmes, durability of natural and vaccine induced sterilising immunity, reduction in reinfectivity after the waning of natural and vaccine-induced immunity against reinfection. The main characteristics of the simulated scenarios are available in supplementary table 1, supplementary table 2 and supplementary table 3.

In this study, we focus on deaths in people infected with COVID-19, although our model also produces estimates of changes in effective reproduction values ( $R_t$ ), numbers of infected and vaccinated individuals, and hospitalised patients. We performed multiple simulations under various scenarios. For clarity, we focus on results of selected scenarios in the main text, but report more data on simulation results in supplementary tables.

## 4. Model's mathematical equations

### Notations:

- subscript used: “s” refers to sex, 1: male, 2: female, 3: both male and female; “a” refers to age group, 1: 0-4 years, 2: 5-9 years, 3: 10-19, ..., 10:  $\geq 80$ ; 11: all age groups. “t” refers to time (day).
- $N$ : The number of the population
- $\lambda_s$ : Force of infection ( $\lambda$ ) measures the risk (probability) of infection transmission, which is a function of transmission rate ( $\beta$ ) and the prevalence of infectious individuals ( $I$ ) among the population ( $N$ ):  $\lambda = \beta \cdot I/N$ .<sup>3</sup>
- $\beta$ : The transmission rate  $\beta$  in this discrete-time model is defined as the average number of individuals infected daily by an infectious person. It is a function of the number of daily close contacts per person ( $c$ ), and the transmission risk per contact between a susceptible and an infectious individual ( $\eta$ ): i.e.,  $\beta = c \cdot \eta$ .<sup>4</sup>
- $\alpha_1$ : rate of progressing from being exposed to being infectious.
- $\alpha_2$ : rate of progressing from being asymptomatic infectious to symptomatic.
- $\mu$ : proportion of infected individuals who will be symptomatic; age-specific
- $\text{inf}A$ : The fraction of infection force for infected individuals with no or mild symptoms. It was assumed that  $\text{inf}A=0.5$  in this study.
- $fS_0$ : fraction of symptomatic patients who will not be quarantined.
- $fS_q$ : fraction of symptomatic patients who will be quarantined (self-isolation).
- $fS_h$ : fraction of symptomatic patients who will be hospitalised (including ICU admission).
- $\gamma A_0$ : rate of recovering for asymptomatic individuals
- $\gamma S_0$ : rate of recovering for symptomatic, not isolated/hospitalised patients
- $\gamma S_1$ : rate of being isolated in symptomatic patients
- $\gamma S_2$ : rate of recovering in isolated patients
- $\gamma H_1$ : rate of being hospitalised for symptomatic patients
- $\gamma H_2$ : rate of recovering in hospitalised patients
- $v_1$ : rate of vaccinating susceptible individuals
- $v_2$ : rate of vaccinating recovered individuals
- $\rho$ : Relative infectivity of the secondary infection ( $I_2$ ) compared with the primary infection ( $I_1$ ). For example, if  $\rho=0.6$ , the infectivity of  $I_2$  is 40% lower than the infectivity of  $I_1$
- $e_1$ : Relative efficacy of vaccine for sterilising immunity, reducing risk of virus transmission
- $e_2$ : Relative efficacy of vaccine for pathology reduction, reducing the proportion of symptomatic cases after being infected
- $IA$ : Asymptomatic individuals
- $IS$ : Symptomatic patients
- $\gamma_a$ : Average rate of recovering of asymptomatic individuals
- $\gamma_s$ : Average rate of recovering of asymptomatic individuals

- $w_v$ : rate of immunity waning in vaccinated individuals
- $w_r$ : rate of immunity waning in recovered individuals
- $drOth_{s,a,t}$ : sex, age-specific risk of deaths from causes other than covid-19, specific by week of the year.
- $drCov_{s,a,d}$ : death risk from infected individuals before recovery, specific according to days since being infected.
- $ds_0$ ,  $ds_q$ , and  $dhos$  are the proportion of covid-19 deaths among symptomatic patients who are not quarantined, those who are isolated, or hospitalised, respectively.  $1=ds_0+ds_q+dhos$

Sex and age specific population:

$$N_{s,a,t} = SU_{s,a,t} + SUR_{s,a,t} + VAC1_{s,a,t} + EX1_{s,a,t} + I01_{s,a,t} + EX2_{s,a,t} + I02_{s,a,t} + IA_{s,a,t} + IS0_{s,a,t} + ISQ_{s,a,t} + ISH_{s,a,t} + RE_{s,a,m,t} \quad (1)$$

Total number of the primary infection with no symptoms (age-specific):

$$aIA1_{a,t} = \sum_s (IA1_{s,a,t} + I01_{s,a,t} \cdot (1 - \mu_a)) \quad (2)$$

Total number of the primary infections with symptoms, isolated (age-specific):

$$aISQ1_{a,t} = \sum_s (ISQ1_{s,a,t}) \quad (3)$$

Total number of the primary infections with symptoms, not isolated (age-specific):

$$aIS01_{a,t} = \sum_s (IS01_{s,a,t} + I01_{s,a,t} \cdot \mu_a) \quad (4)$$

Total number of the secondary infection with no symptoms (age-specific):

$$aIA2_{a,t} = \sum_s (IA2_{s,a,t} + I02_{s,a,t} \cdot (1 - \mu_a \cdot e_2)) \quad (5)$$

Total number of the secondary infections with symptoms, isolated (age-specific):

$$aISQ2_{a,t} = \sum_s (ISQ2_{s,a,t}) \quad (6)$$

Total number of the secondary infections with symptoms, not isolated (age-specific):

$$aIS02_{a,t} = \sum_s (IS02_{s,a,t} + I02_{s,a,t} \cdot \mu_a \cdot e_2) \quad (7)$$

-----  
Sex and age specific susceptible population:

$$SU_{s,a,t+1} = (SU_{s,a,t} - suExp_{s,a,t} - VAC1_{s,a,t}) \cdot (1 - drOth_{s,a,t}) + NewBirth_{s,t} \quad (8)$$

Note:  $drOth_{s,a,t}$  is sex, age-specific death rates for non-covid causes, specific by week of the year.

Newly exposed/infected with SARS-CoV-2 in susceptible individuals:

$$suExp_{s,a,t} = \sum_{j=1}^{10} SU_{s,a,t} \cdot \eta_t \left( \left( Ca_{a,j,t} \cdot \frac{infA \cdot aIA1_{j,t} + aIS1_{j,t}}{N_{3,j,t}} + Cb_{a,j,t} \cdot \frac{aISQ1_{j,t}}{N_{3,j,t}} \right) + \rho \cdot \left( Ca_{a,j,t} \cdot \frac{infA \cdot aIA2_{j,t} + aIS2_{j,t}}{N_{3,j,t}} + Cb_{a,j,t} \cdot \frac{aISQ2_{j,t}}{N_{3,j,t}} \right) \right) \quad (9)$$

Notes:  $Ca_{a,j,t}$  is the average number of general contacts between people aged  $a$  and  $j$ ; and  $Cb_{a,j,t}$  is the average number of household contacts between people age  $a$  and  $j$ .

Newly exposed/infected in vaccinated individuals:

$$vacExp_{s,a,t} = \sum_{j=1}^{10} VAC1_{s,a,t} \cdot \eta_t \cdot e_1 \left( \left( Ca_{a,j,t} \cdot \frac{infA \cdot aIA1_{j,t} + aIS1_{j,t}}{N_{3,j,t}} + Cb_{a,j,t} \cdot \frac{aISQ1_{j,t}}{N_{3,j,t}} \right) + \rho \cdot \left( Ca_{a,j,t} \cdot \frac{infA \cdot aIA2_{j,t} + aIS2_{j,t}}{N_{3,j,t}} + Cb_{a,j,t} \cdot \frac{aISQ2_{j,t}}{N_{3,j,t}} \right) \right) \quad (10)$$

Newly exposed/infected in the recovered or vaccinated after waning of immunity:

$$sureExp_{s,a,t} = \sum_{j=1}^{10} Sure_{s,a,t} \cdot \eta_t \left( \left( Ca_{a,j,t} \cdot \frac{infA \cdot aIA1_{j,t} + aIS1_{j,t}}{N_{3,j,t}} + Cb_{a,j,t} \cdot \frac{aISQ1_{j,t}}{N_{3,j,t}} \right) + \rho \cdot \left( Ca_{a,j,t} \cdot \frac{infA \cdot aIA2_{j,t} + aIS2_{j,t}}{N_{3,j,t}} + Cb_{a,j,t} \cdot \frac{aISQ2_{j,t}}{N_{3,j,t}} \right) \right) \quad (11)$$

The number of the recovered or vaccinated who lose sterilising immunity ( $d$  from 1 to  $tt$ ):

$$Sure_{s,a,t+1} = (Sure_{s,a,t} - sureEXP_{s,a,t}) \cdot (1 - drOth_{s,a,t}) + \sum_{d=1}^{tt} (iRE_{s,a,d,t} \cdot \omega_{r,d} + iVAC1_{s,a,d,t} \cdot \omega_{v,d}) \quad (12)$$

Notes: “ $tt$ ” is the total number of days simulated.  $\omega_{r,d}$  and  $\omega_{v,d}$  are gamma distributed rate of immunity waning, respectively, a function of days since the recovery and vaccination.  $iRE_{s,a,d,t}$  is the number of recovered since  $d$  days from recovery; and  $eVAC1_{s,a,d,t}$  is the number of vaccinated since  $d$  days after vaccination.

The number of new ( $d=1$ ) primary infections in susceptible individuals:

$$iEX1_{s,a,1,t} = suEXP_{s,a,t} \quad (13)$$

The number of new ( $d=1$ ) secondary infections in recovered or vaccinated individuals:

$$iEX2_{s,a,1,t} = sureEXP_{s,a,t} + vacExp_{s,a,t} \quad (14)$$

For  $d=1,2,3 \dots 60$  (assuming all will be dead or recovered by day 60 after being infected):

$$iEX1_{s,a,d+1,t+1} = iEX1_{s,a,d,t} \cdot (1 - \alpha 1_d) \quad (15)$$

$$iEX2_{s,a,d+1,t+1} = iEX2_{s,a,d,t} \cdot (1 - \alpha 1_d) \quad (16)$$

Assumed that covid-19 deaths were from symptomatic patients only. Overall deaths from covid-19 were calculated using the case fatality rates, and timing of covid-19 related deaths were assumed to have a gamma distribution according to days since being infected. Therefore a variable was introduced to record number of symptomatic individuals by days since being exposed/infected to calculate number of covid-19 deaths:

$$iSY_{s,a,1,t} = \mu_a (suExp_{s,a,t} + e_2 \cdot (surExp_{s,a,t} + vacExp_{s,a,t})) \quad (17)$$

For  $d=1,2,3\dots 60$  (the transmission completed by day 60):

$$iSY_{s,a,d+1,t+1} = iSY_{s,a,d,t} \cdot (1 - drCov_{s,a,d}) \quad (18)$$

The number of covid-19 deaths at time t:

$$dthCov_{s,a,t} = \sum_{d=1}^{60} iSY_{s,a,d,t} \cdot drCov_{s,a,d} \quad (19)$$

The number of new ( $d=1$ ) primary infections individuals before onset of symptoms:

$$iI01_{s,a,1,t+1} = \sum_{d=1}^{60} iEX1_{s,a,d,t} \cdot \alpha1_d \quad (20)$$

The number of new ( $d=1$ ) secondary infectious individuals before onset of symptoms:

$$iI02_{s,a,1,t+1} = \sum_{d=1}^{60} iEX2_{s,a,d,t} \cdot \alpha1_d \quad (21)$$

For  $d=1,2,3\dots 60$  (the transmission completed by day 60):

$$iI01_{s,a,d+1,t+1} = iI01_{s,a,d,t} \cdot (1 - \alpha2_d) \quad (22)$$

$$iI02_{s,a,d+1,t+1} = iI02_{s,a,d,t} \cdot (1 - \alpha2_d) \quad (23)$$

The number of all infectious individuals before onset of symptoms:

$$I0_{s,a,t} = \sum_{d=1}^{60} iI0_{s,a,d,t} \quad (24)$$

The number of new ( $d=1$ ) infected individuals with no or very mild symptoms:

$$iIA_{s,a,1,t+1} = \sum_{d=1}^{60} (iI01_{s,a,d,t} \cdot \alpha2_d \cdot (1 - \mu_a) + iI02_{s,a,d,t} \cdot \alpha2_d \cdot (1 - e_2 \mu_a)) \quad (25)$$

For  $d=1,2,3\dots 60$  (the transmission completed by day 60):

$$iIA_{s,a,d+1,t+1} = iIA_{s,a,d,t} \cdot (1 - \gamma A_d) \quad (26)$$

The number of all infectious individuals with no or mild symptoms:

$$IA_{s,a,t} = \sum_{d=1}^{60} iIA_{s,a,d,t} \quad (27)$$

The number of all new ( $d=1$ ) symptomatic patients:

$$SYM_{s,a,t+1} = \sum_{d=1}^{60} (iI01_{s,a,d,t} + e_2 \cdot iI02_{s,a,d,t}) \cdot \alpha 2_d \cdot \mu_a \quad (28)$$

The number of new (d=1) symptomatic patients who are not self-isolated:

$$iISO_{s,a,1,t} = SYM_{s,a,t} \cdot fS0_t \quad (29)$$

Symptomatic patients (before being isolated or hospitalised):

$$iISO_{s,a,d+1,t+1} = (iISO_{s,a,d,t} - dthCov_{s,a,t} \cdot ds0_d) \cdot (1 - YS0_d) \quad (30)$$

The number of new (d=1) symptomatic patients being isolated/quarantined:

$$iIQ_{s,a,1,t} = SYM_{s,a,t} \cdot fSq_{a,t} \quad (31)$$

Isolated symptomatic patients:

$$iIQ_{s,a,d+1,t+1} = \sum_{d=1}^{60} (iIQ_{s,a,d,t} - dthCov_{s,a,t} \cdot dsq_d) \cdot (1 - YS1_d) \quad (32)$$

The number of new (d=1) symptomatic patients being hospitalised:

$$iISH_{s,a,1,t} = SYM_{s,a,t} \cdot fSh_{a,t} \quad (33)$$

Hospitalised symptomatic patients:

$$iISH_{s,a,d+1,t+1} = \sum_{d=1}^{60} (iISH_{s,a,d,t} - dthCov_{s,a,t} \cdot dsh_d) \cdot (1 - YH1_d) \quad (34)$$

The number newly recovered people (d=1):

$$iRE_{s,a,1,t+1} = \sum_{d=1}^{60} (iIA_{s,a,d,t} \cdot YAO_d + iISO_{s,a,d,t} \cdot YS0_d + iISQ_{s,a,d,t} \cdot YS2_d + iISH_{s,a,d,t} \cdot YH2_d + VAC2_t) \quad (35)$$

Note:  $VAC2_t$  is the number of newly vaccinated individuals who recovered from previous infections.

All recovered for d=1,2,3...tt:

$$iRE_{s,a,d+1,t+1} = (iRE_{s,a,d,t} - VAC2_t) \cdot (1 - ur_d) \cdot (1 - drOth_{s,a,t}) \quad (36)$$

All recovered individuals:

$$RE_{s,a,t} = \sum_{d=1}^{tt} iRE_{s,a,d,t} \quad (37)$$

### Derived reproduction values (R0, Rt)

The basic reproduction ratio (R0) is defined as the average number of individuals infected by a typical infectious individual in a total susceptible population, and effective reproduction ratio (Rt) is the number

of individuals infected by an infectious individual when only a proportion of the population are susceptible and the disease transmission dynamic may be influenced by control measures.<sup>38</sup> R values depend on the risk of infection per contact between an infectious and susceptible person, person-to-person contacts between individuals, the rate of transition from exposed to infectious, infectious period, and the prevalence of susceptible individuals in the population.<sup>3</sup> In this study, we don't use the reproduction ratio directly in simulating the spread of SARS-CoV-2 virus. To facilitate the understanding of effects of different intervention strategies, we estimated R0 and Rt during the simulation period, based on average values of relevant parameters and the calculation method used in a modelling study by Giordano et al.<sup>27</sup>

Average values of relevant parameters for estimating R values:

Weighted average fraction of symptomatic individuals in all infected individuals:

$$fS_t = \sum_a (\mu_a \cdot N_{3,a,t} / N_{3,11,t}) \quad (38)$$

Weighted average fraction of hospitalised symptomatic patients:

$$fH_t = \sum_a (fSH_{a,t} \cdot N_{3,a,t} / N_{3,11,t}) \quad (39)$$

Weighted average fraction of symptomatic patients self-isolated:

$$fQ_t = \sum_a (fSQ_{a,t} \cdot N_{3,a,t} / N_{3,11,t}) \quad (40)$$

Risk of daily transmission per infectious individual, depending on asymptomatic or symptomatic, household isolated or not:

$$\beta I0_t = \sum_{a,j=1}^{10} \mu_t \cdot Ca_{a,j,t} \cdot \frac{N_{j,t}}{N_{3,11,t}} \cdot (infA \cdot (1 - fS_t) + fS_t) \quad (41)$$

$$\beta IA_t = \sum_{a,j=1}^{10} \mu_t \cdot Ca_{a,j,t} \cdot \frac{N_{j,t}}{N_{3,11,t}} \cdot infA \cdot (1 - fS_t) \quad (42)$$

$$\beta SQ_t = \sum_{a,j=1}^{10} \mu_t \cdot Cb_{a,j,t} \cdot \frac{N_{j,t}}{N_{3,11,t}} \cdot (infA \cdot (1 - fS_t) + fS_t) \quad (43)$$

$$\beta S0_t = \sum_{a,j=1}^{10} \mu_t \cdot Ca_{a,j,t} \cdot \frac{N_{j,t}}{N_{3,11,t}} \quad (44)$$

The following transition variables are calculated for estimating R values:

$$d1_t = \alpha 2_t \cdot (1 - fS_t) \quad (45)$$

$$d2_t = \alpha 2_t \cdot fS_t \cdot fS0_t \quad (46)$$

$$d3_t = \alpha 2_t \cdot fS_t \cdot fSQ_t \quad (47)$$

$$d4_t = \alpha 2_t \cdot fS_t \cdot fSH_t \quad (48)$$

$$dA1_t = d1_t + d2_t + d3_t + d4_t \quad (49)$$

$$d5_t = \alpha 2_t \cdot (1 - fS_t \cdot e_2) \quad (50)$$

$$d6_t = \alpha 2_t \cdot fS_t \cdot fS0_t \cdot e_2 \quad (51)$$

$$d7_t = \alpha 2_t \cdot fS_t \cdot fSQ_t \cdot e_2 \quad (52)$$

$$d8_t = \alpha 2_t \cdot fS_t \cdot fSH_t \cdot e_2 \quad (53)$$

$$dA2_t = d5_t + d6_t + d7_t + d8_t \quad (54)$$

Effective reproductive value (Rt):

$$Rt = \frac{SU_{3,11,t}}{N_{3,11,t}} \left( \beta I0_t \cdot \frac{1}{dA1_t} + \beta IA_t \cdot \frac{d1_t}{dA1_t \cdot \gamma A0_t} + \beta S0_t \cdot \frac{d2_t}{dA1_t \cdot \gamma S0_t} + \beta SQ_t \cdot \frac{d3_t}{dA1_t \cdot \gamma S1_t} + \beta SH_t \cdot \frac{d4_t}{dA1_t \cdot \gamma H1_t} \right) + \left( \frac{SURE_{3,11,t}}{N_{3,11,t}} + \frac{VAC_{3,11,t}}{N_{3,11,t}} \cdot e_1 \right) \cdot \rho \cdot \left( \beta I0_t \cdot \frac{1}{dA2_t} + \beta IA_t \cdot \frac{d5_t}{dA2_t \cdot \gamma A0_t} + \beta S0_t \cdot \frac{d6_t}{dA2_t \cdot \gamma S0_t} + \beta SQ_t \cdot \frac{d7_t}{dA2_t \cdot \gamma S1_t} + \beta SH_t \cdot \frac{d8_t}{dA2_t \cdot \gamma H1_t} \right) \quad (55)$$



## 5. Modelling R code and input data files

R code used in this modelling study is provided below. Input data and parameters shown in the code is from a scenario with the following assumptions: annual revaccination during 2021-2024, long-term vaccine efficacy 62.5%, reduction in reinfectivity after waning of immunity 45%. Input data files required for running the R code are provided at the end of this section.

### 5.1 R code used

```
#####
## R code for simulating outbreak of covid-19 in England
#####

tt <-1827          # 1827, from 1/1/20 to 31/12/24

#-----
VAC <- 1          # Vaccination: 1- yes; 0-no
VACtime <-367    # relevant if VAC=1
back.nom <-1     # re-normality from 'back.tim', 1-Yes, 0-No
back.tim <-566   # t=566:19/7/2021
ASYinf <-0.21    # Relative infectivity of asymptomatic cases

dGap <-365       # Interval between vac waves (day)

# VAC coverage for age groups
vac.crg1 <-0.75  # 0.60  VAC coverage age 16-29
vac.crg2 <-0.80  # 0.70  VAC coverage age 30-39
vac.crg3 <-0.85  # 0.80  VAC coverage age 40-49
vac.crg4 <-0.90  # 0.90  VAC coverage age 50+

bta.nom <- 0.081 # from back.tim
#+-----+

nRvac <-4        # revaccination waves
InfI2 <-0.45     # Relative infectivity after immunity loss
rVEinf1 <-0.3876 # Efficacy of vaccine dose-1 on transmission risk
rVESym1 <-0.3876 # Efficacy of vaccine dose-1 on reduced symptomatic cases
rVEinf2 <-0.6127 # Efficacy of vaccine dose-2 on transmission risk
rVESym2 <-0.6127 # Efficacy of vaccine dose-2 on reduced symptomatic cases
rVEinf3 <-0.3876 # Long-term VE on infection
rVESym3 <-0.3876 # Long-term VE on symptoms
rWinter1 <- 1.10 # Winter transmissibility: Sep-Oct, Mar-Apr
rWinter2 <- 1.20 # Winter transmissibility: Nov-Feb
pIM <-1          # Natural immunity: 1-long-lived; 0-short-lived
gwan.m <-730     # mean durability (days) of immunity
gwan.s <-27.019  # gamma shape k
pIMv <-1         # Vaccine immunity 1:long-lived; 0:short-lived
gwanv.m <-365    # mean durability (days) of vaccine immunity
gwanv.s <-19.105 # gamma shape k

##+-----+
## Vaccination timing, waves and age groups
##=====
vac.AGP <- array(0, dim=c(7))          # no. of agegroups to be vaccinated phase 1-6
vac.tim <- array(0, dim=c(18))         # starting time of each vaccination wave
vaggp <- array(0, dim=c(18,7))        # agegroup (Vp:1-6, age 1,2)
#-----
vac.tim[1] <-VACtime
if(nRvac>1) {
  for(rev in 2:nRvac) {
    vac.tim[rev] <- vac.tim[rev-1] +dGap # time of re-vaccination
  }
}
```

```

vac.dmaxi <- 180000      # Maximum no. of individuals vaccinated
#-----
vac.AGP[1] <-6          # 1: 70+; 2: 60-69; 3: 50-59;
                        # 4: 40-49; 5: 20-39; 6: 16(10)-19
if(nRvac>1)             {
  for(rev in 2:nRvac) {
    vac.AGP[rev] <-6
  }
}
#-----
# Age ranges for vaccination from age phase 1 to 4
#-----
vagp[1,1] <- 9          # age grp 9: 70+
vagp[1,2] <- 10         # age grp 10: 85+
vagp[2,1] <- 8          # age grp 8: 60-69
vagp[2,2] <- 8          # age grp 8:
vagp[3,1] <- 7          # age grp 7: 50-59
vagp[3,2] <- 7          # age grp 7:
vagp[4,1] <- 6          # age grp 6: 40-49
vagp[4,2] <- 6          # age grp 6:
vagp[5,1] <- 4          # age grp 4: 20-29
vagp[5,2] <- 5          # age grp 5: 30-39
vagp[6,1] <- 3          # age grp 3: 10-19
vagp[6,2] <- 3          # age grp 3: (40% for 16-19)
#=====
ts <- 15                # Epidemic simulation start from 01/02/2020
seeds <-1              # Inital no. of exposed/infected
dv0 <-14               # Days required for developing immunity after vaccination
tv0 <-63               # duration between dose-1 and dose-2: 9 weeks on average
tw0 <-tt               # longest duration before immunity loss in recovered
dd <-60                # maximum days from exposed to recover or death.
tm0 <-tt               # only used for defining death risk by days when tt<1096
tage <-367             # t starting to shift age up
#####
beta <- array(0, dim=c(tt)) # Infection risk per contact between susceptible and infected
adjHsp <- array(0, dim=c(tt)) # Adjust ratio for hospitalisation rate
adjDth <- array(0, dim=c(tt)) # Adjust case fatality to hospital fatality
###=====
## Calibrate beta[t], adjHsp, adjDth
##=====
for(t in 1:tt) { # No covid epidemdic before ts
  beta[t] <-0.094
#-----
  if(NPI==1) {
#-----
    if(t>74) { # t> 15/03/2020
      beta[t] <- 0.069 # social distancing
    } #
    if(t>83) { # t> 23/03/2020
      beta[t] <-0.066 # Lockdown date
    } #
    if(t>132) { # t=132:11/05/2020
      beta[t] <-0.062 # Advised wearing face covering
    } #
    if(t>280) { # t=291: 17/10/2020:
      beta[t] <-0.077 # Increased transmissibility by new variant
    } #
    if(t>487) { # t>= 01/05/2021
      beta[t] <-0.081 # new delta variant
    } #
    if(back.nom==1) { # Returning to normal life
      if(t>(back.tim-1)) {
        beta[t] <-bta.nom
      }
    }
  }
}

```

```

    }
  } # end if NPI==1
} # for t in ts:tt

#####
# Ratio for adjusting case fatality rate
#####
for(t in 1:tt) {
  adjDth[t] <- 2.00 # higher death rate initially
  if(t>91) { adjDth[t] <- 1.80 } # t=92: 1/4/20:
  if(t>100) { adjDth[t] <- 1.60 }
  if(t>110) { adjDth[t] <- 1.40 }
} # end t in ts:tt

#####
# Ratio for calibrating hospitalisation rate
#####
for(t in 1:tt) { adjHsp[t] <- 0.30 }

#####
## output files for simulation results
##-----
Header.scen <- cbind("Time", "Rt", "POP_N", "SUS", "SUS.rec", "SUS.vac", "RE", "VAef1", "VAef2", "New.VAC",
  "New_Exp", "New_Sym", "New_HS", "HS_pts", "Infect_sum", "DthCov-day", "DthCov_cum",
  "DthAll_day") # End Header.out
OFileName <- paste("...\\ResOut".out", sep="")
write.table(Header.scen, file=OFileName, sep="\t", quote=FALSE,
  append=FALSE, row.names=FALSE, col.names=FALSE)

#####
## Definition of Population and other key variables
##-----
N <- array(0, dim=c(tt,3,11)) # Total population[t,sex,age,cmb]
SU <- array(0, dim=c(tt,3,11)) # Suceptable[t,sex,age,cmb]
EX <- array(0, dim=c(tt,3,11)) # Exposed[t,sex,age,cmb]
EXv1 <- array(0, dim=c(tt,3,11)) # Exposed in vaccinated
EXv2 <- array(0, dim=c(tt,3,11))
I0 <- array(0, dim=c(tt,3,11)) # Infected -presymptomatic
I0v1 <- array(0, dim=c(tt,3,11)) # Infected -presymptomatic in vaccinated
I0v2 <- array(0, dim=c(tt,3,11))
IM0 <- array(0, dim=c(tt,3,11)) # Infected no quarantine -mild
IM0v <- array(0, dim=c(tt,3,11)) # Infection after vaccination or reinfection
IS0 <- array(0, dim=c(tt,3,11)) # Infected no quarantine/no hospital -severe
IS0v <- array(0, dim=c(tt,3,11)) # Infection after vaccination or reinfection
ISq <- array(0, dim=c(tt,3,11)) # To be quarantined -severe
ISqv <- array(0, dim=c(tt,3,11)) # Infection after vaccination or reinfection
ISH <- array(0, dim=c(tt,3,11)) # To be hospitalised
ISHv <- array(0, dim=c(tt,3,11)) # Infection after vaccination or reinfection
QS <- array(0, dim=c(tt,3,11)) # Quarantined -severe
Qsv <- array(0, dim=c(tt,3,11))
HS <- array(0, dim=c(tt,3,11)) # Hospitalised -severe
Hsv <- array(0, dim=c(tt,3,11))
RE <- array(0, dim=c(tt,3,11)) # Recovered

eRE <- array(0, dim=c(tt,tw0,3,11)) # By days since recovered/vacciated for waning immunity

SU.vac <- array(0, dim=c(tt,3,11)) # Suceptable from vaccinated
SU.rec <- array(0, dim=c(tt,3,11)) # Suceptable from recovered clinical
vac.SU <- array(0, dim=c(tt,3,11)) # Vaccinated suceptable[t,sex,age,cmb]
vac.SUvac <- array(0, dim=c(tt,3,11)) # vaccinated in loss of vaccine immunity
vac.SUrec <- array(0, dim=c(tt,3,11)) # vaccination of loss immunity in clinical recovered

eEX <- array(0, dim=c(tt,dd,3,11)) # Exposed[t,sex,age,cmb]
eEXv1 <- array(0, dim=c(tt,dd,3,11)) # Exposed in vaccinated
eEXv2 <- array(0, dim=c(tt,dd,3,11))
eI0 <- array(0, dim=c(tt,dd,3,11)) # Infected -presymptomatic
eI0v1 <- array(0, dim=c(tt,dd,3,11)) # Infected -presymptomatic in vaccinated
eI0v2 <- array(0, dim=c(tt,dd,3,11))
eIM0 <- array(0, dim=c(tt,dd,3,11)) # Infected no quarantine -mild
eIM0v <- array(0, dim=c(tt,dd,3,11))

```

```

eIS0 <- array(0, dim=c(tt,dd,3,11)) # Infected no quarantine/no hospital -severe
eIS0v <- array(0, dim=c(tt,dd,3,11))
eISq <- array(0, dim=c(tt,dd,3,11)) # To be quarantined -severe
eISqv <- array(0, dim=c(tt,dd,3,11))
eISh <- array(0, dim=c(tt,dd,3,11)) # To be hospitalised
eIShv <- array(0, dim=c(tt,dd,3,11))
eQS <- array(0, dim=c(tt,dd,3,11)) # Quarantined -severe
eQSV <- array(0, dim=c(tt,dd,3,11))
eHS <- array(0, dim=c(tt,dd,3,11)) # Hospitalised -severe
eHSv <- array(0, dim=c(tt,dd,3,11))

VA0 <- array(0, dim=c(tt,3,11)) # Vaccinated before immunity developed
VAef1 <- array(0, dim=c(tt,3,11)) # Successful partial immunised
VAef2 <- array(0, dim=c(tt,3,11))
eVA0 <- array(0, dim=c(tt,dv0,3,11)) # Specify days since vaccination 1-14 days
eVAef1 <- array(0, dim=c(tt,tv0,3,11)) # by days since vaccinated dose-1
eVAef2 <- array(0, dim=c(tt,tw0,3,11)) # by days since vaccinated dose-2

eInf <- array(0, dim=c(tt,dd,3,11)) # Tracing with days since exposed/infected
eInfv <- array(0, dim=c(tt,dd,3,11)) # Tracing with days since exposed/infected in reinfected
Infect.sum <- array(0, dim=c(tt)) # Total no. of infected at t

#-----
# Temporary variable for up shifting ages

jN <- array(0, dim=c(10)); jSU <- array(0, dim=c(10)); jSU.vac <- array(0, dim=c(10))
jSU.rec <- array(0, dim=c(10)); jRE <- array(0, dim=c(10)); jEX <- array(0, dim=c(10))
jI0 <- array(0, dim=c(10)); jIM0 <- array(0, dim=c(10)); jIS0 <- array(0, dim=c(10))
jISq <- array(0, dim=c(10)); jISh <- array(0, dim=c(10)); jQS <- array(0, dim=c(10))
jHS <- array(0, dim=c(10))

jEXv1 <- array(0, dim=c(10)); jI0v1 <- array(0, dim=c(10))
jEXv2 <- array(0, dim=c(10)); jI0v2 <- array(0, dim=c(10)); jIM0v <- array(0, dim=c(10))
jIS0v <- array(0, dim=c(10)); jISqv <- array(0, dim=c(10)); jIShv <- array(0, dim=c(10))
jQSV <- array(0, dim=c(10)); jHSv <- array(0, dim=c(10)); jVA0 <- array(0, dim=c(10))
jVAef1 <- array(0, dim=c(10)); jVAef2 <- array(0, dim=c(10))

jeEX <- array(0, dim=c(dd,10)); jeI0 <- array(0, dim=c(dd,10)); jeIM0 <- array(0, dim=c(dd,10))
jeIS0 <- array(0, dim=c(dd,10)); jeISq <- array(0, dim=c(dd,10)); jeISh <- array(0, dim=c(dd,10))
jeQS <- array(0, dim=c(dd,10)); jeHS <- array(0, dim=c(dd,10))

jeEXv1 <- array(0, dim=c(dd,10)); jeI0v1 <- array(0, dim=c(dd,10)); jeEXv2 <- array(0, dim=c(dd,10))
jeI0v2 <- array(0, dim=c(dd,10))

jeIM0v <- array(0, dim=c(dd,10)); jeIS0v <- array(0, dim=c(dd,10)); jeISqv <- array(0, dim=c(dd,10))
jeIShv <- array(0, dim=c(dd,10)); jeQSV <- array(0, dim=c(dd,10)); jeHSv <- array(0, dim=c(dd,10))
jeInf <- array(0, dim=c(dd,10)); jeInfv <- array(0, dim=c(dd,10))

jeVA0 <- array(0, dim=c(dv0,10)); jeVAef1 <- array(0, dim=c(tv0,10)); jeVAef2 <- array(0, dim=c(tw0,10))
jeRE <- array(0, dim=c(tw0,10))

#-----

HS.new <- array(0, dim=c(tt,3,11)) ; allHS <- array(0, dim=c(tt))

Bsex <- array(0, dim=c(2)) # % sex ratio for births
dBth <- array(0, dim=c(11)) # No. of births/day, note: dBth[>1] <-0

Li0 <- array(0, dim=c(tt,11)) # total no. of pre-clin infectious
Lm0 <- array(0, dim=c(tt,11)) # total no. of mild cases - not quarantined
Lm <- array(0, dim=c(tt,11))
Ls0 <- array(0, dim=c(tt,11)) # total no. of severe cases - not quarantined
Ls <- array(0, dim=c(tt,11))
Lsq <- array(0, dim=c(tt,11)) # total no. of severe cases - quarantined
Li0v <- array(0, dim=c(tt,11)) # total no. of pre-clin infectious
Lm0v <- array(0, dim=c(tt,11)) # total no. of mild cases - not quarantined
Lmv <- array(0, dim=c(tt,11))
Ls0v <- array(0, dim=c(tt,11)) # total no. of severe cases - not quarantined
Lsv <- array(0, dim=c(tt,11))
Lsqv <- array(0, dim=c(tt,11)) # total no. of severe cases - quarantined

```

```

IAI <- array(0, dim=c(tt))

Rt <- array(0, dim=c(tt))
exposed.n <- array(0, dim=c(tt))

drisk.inf <- array(0, dim=c(2,11)) # death risk in symptomatic cases
rHosp <- array(0, dim=c(11)) # Case hospitalisation rate

rADth0 <- array(0, dim=c(366,3,11)) # 5yr average death rate/1000/day without comorbidity

nDth.inf <- array(0, dim=c(tt,3,11)) # Covid related deaths -all
nDth.s0 <- array(0, dim=c(tt,dd,3,11)) # Covid related deaths -infected
nDth.sq <- array(0, dim=c(tt,dd,3,11)) # Covid related deaths -infected
nDth.ss <- array(0, dim=c(tt,3,11)) # Covid related deaths -outside hospital
nDth.hos <- array(0, dim=c(tt,dd,3,11)) # Covid related deaths-hospital

nDth.infv <- array(0, dim=c(tt,3,11)) # Covid related deaths -all
nDth.s0v <- array(0, dim=c(tt,dd,3,11)) # Covid related deaths -infected
nDth.sqv <- array(0, dim=c(tt,dd,3,11)) # Covid related deaths -infected
nDth.ssv <- array(0, dim=c(tt,3,11)) # Covid related deaths -outside hospital
nDth.hosv <- array(0, dim=c(tt,dd,3,11)) # Covid related deaths-hospital

nDth.cov <- array(0, dim=c(tt,3,11)) # Covid related deaths
nDth.oth <- array(0, dim=c(tt,3,11)) # no. of other deaths in SU, RE and VAC

nDth.all <- array(0, dim=c(tt,3,11)) # All cause deaths including covid & non-covid deaths
nDthHos.all <- array(0, dim=c(tt,3,11)) # All cause deaths including covid & non-covid deaths
nDthHos.allv <- array(0, dim=c(tt,3,11))

nDthcum.cov <- array(0, dim=c(tt)) # Covid related deaths -Cumulative

beta2.i0 <- array(0, dim=c(tt)); beta2.m0 <- array(0, dim=c(tt)); beta2.mq <- array(0, dim=c(tt))
beta2.s0 <- array(0, dim=c(tt)); beta2.sq <- array(0, dim=c(tt)); beta2.al <- array(0, dim=c(tt))

dk <- array(0, dim=c(tt,18)); dA <- array(0, dim=c(tt)); dAv1 <- array(0, dim=c(tt))
dAv2 <- array(0, dim=c(tt))

gdth.inf <- array(0, dim=c(dd)) # gamma distribution of deaths by days since infected
gdth.hos <- array(0, dim=c(dd)) # gamma distribution of deaths by days since hos admin
alp1 <- array(0, dim=c(dd)) # Transition rate from exposed to I0
alp2 <- array(0, dim=c(dd)) # Transition rate from I0 to I_clinical
gm0.m <- array(0, dim=c(tt)) # gamma mean from IM0 to RE
gm0.s <- array(0, dim=c(tt)) # gamma sd
gs0.m <- array(0, dim=c(tt)) # gamma mean from IS0 to RE
gs0.s <- array(0, dim=c(tt)) # gamma sd
gs1.m <- array(0, dim=c(tt)) # gamma mean from ISq to QS
gs1.s <- array(0, dim=c(tt)) # gamma sd
gs2.m <- array(0, dim=c(tt)) # gamma mean from QS to RE
gs2.s <- array(0, dim=c(tt)) # gamma sd
gh1.m <- array(0, dim=c(tt)) # gamma mean from ISh to HS
gh1.s <- array(0, dim=c(tt)) # gamma sd
gh2.m <- array(0, dim=c(tt)) # gamma mean from HS to RE
gh2.s <- array(0, dim=c(tt)) # gamma sd

# Day since infection specific transition rates:
gam.m0 <- array(0, dim=c(tt,dd)) # duration from IM0 to RE
gam.s0 <- array(0, dim=c(tt,dd)) # duration from IS0 to RE
gam.s1 <- array(0, dim=c(tt,dd)) # duration from ISq to QS
gam.s2 <- array(0, dim=c(tt,dd)) # duration from QS to RE
gam.h1 <- array(0, dim=c(tt,dd)) # duration from ISh to HS
gam.h2 <- array(0, dim=c(tt,dd)) # duration from HS to RE

# Average transition rates for estimating Rt
gam.m0a <- array(0, dim=c(tt)) # duration from IM0 to RE
gam.s0a <- array(0, dim=c(tt)) # duration from IS0 to RE
gam.s1a <- array(0, dim=c(tt)) # duration from ISq to QS
gam.s2a <- array(0, dim=c(tt)) # duration from QS to RE
gam.h1a <- array(0, dim=c(tt)) # duration from ISh to HS
gam.h2a <- array(0, dim=c(tt)) # duration from HS to RE

```

```

gimm.wan <- array(0, dim=c(tw0)) # Distribution of immunity waning
gimmv.wan <- array(0, dim=c(tw0)) # Distribution of vaccine immunity waning

cum_gdth.inf <- array(0, dim=c(dd)) # gamma distribution of deaths by days since infected
cum_gdth.hos <- array(0, dim=c(dd)) # gamma distribution of deaths by days since hos admin
cum_alp1 <- array(0, dim=c(dd)) # Transition rate from exposed to I0
cum_alp2 <- array(0, dim=c(dd)) # Transition rate from I0 to I_clinical
cum_gm0.m <- array(0, dim=c(tt)) # gamma mean from IM0 to RE
cum_gm0.s <- array(0, dim=c(tt)) # gamma sd
cum_gs0.m <- array(0, dim=c(tt)) # gamma mean from IS0 to RE
cum_gs0.s <- array(0, dim=c(tt)) # gamma sd
cum_gs1.m <- array(0, dim=c(tt)) # gamma mean from ISq to QS
cum_gs1.s <- array(0, dim=c(tt)) # gamma sd
cum_gs2.m <- array(0, dim=c(tt)) # gamma mean from QS to RE
cum_gs2.s <- array(0, dim=c(tt)) # gamma sd
cum_gh1.m <- array(0, dim=c(tt)) # gamma mean from ISh to HS
cum_gh1.s <- array(0, dim=c(tt)) # gamma sd
cum_gh2.m <- array(0, dim=c(tt)) # gamma mean from HS to RE
cum_gh2.s <- array(0, dim=c(tt)) # gamma sd

# Day since infection specific transition rates:
cum_gam.m0 <- array(0, dim=c(tt,dd)) # duration from IM0 to RE
cum_gam.s0 <- array(0, dim=c(tt,dd)) # duration from IS0 to RE
cum_gam.s1 <- array(0, dim=c(tt,dd)) # duration from ISq to QS
cum_gam.s2 <- array(0, dim=c(tt,dd)) # duration from QS to RE
cum_gam.h1 <- array(0, dim=c(tt,dd)) # duration from ISh to HS
cum_gam.h2 <- array(0, dim=c(tt,dd)) # duration from HS to RE

# Average transition rates for estimating Rt
cum_gam.m0a <- array(0, dim=c(tt)) # duration from IM0 to RE
cum_gam.s0a <- array(0, dim=c(tt)) # duration from IS0 to RE
cum_gam.s1a <- array(0, dim=c(tt)) # duration from ISq to QS
cum_gam.s2a <- array(0, dim=c(tt)) # duration from QS to RE
cum_gam.h1a <- array(0, dim=c(tt)) # duration from ISh to HS
cum_gam.h2a <- array(0, dim=c(tt)) # duration from HS to RE

cum_gimm.wan <- array(0, dim=c(tw0)) # Distribution of immunity waning
cum_gimmv.wan <- array(0, dim=c(tw0)) # Distribution of vaccine immunity waning

rFm <- array(0, dim=c(11)) # % from I0 to Mild -age-specific
rFsq <- array(0, dim=c(tt,11)) # % from I0 to QS
rFhos <- array(0, dim=c(tt,11)) # % from I0 to HS

rFhos.al <- array(0, dim=c(tt)); rFm.al <- array(0, dim=c(tt)); rFsq.al <- array(0, dim=c(tt))

New.expsu <- array(0, dim=c(tt,3,11)) # Newly exposed in SU
New.expv0 <- array(0, dim=c(tt,3,11)) # Newly exposed in VA0
New.expv1 <- array(0, dim=c(tt,3,11)) # Newly exposed in VAef1
New.expv2 <- array(0, dim=c(tt,3,11)) # Newly exposed in VAef2
New.expal <- array(0, dim=c(tt,3,11)) # Newly exposed -all

Expv0 <- array(0, dim=c(tt,dv0,3,11)) # Newly exposed in VA0 by day
Expv1 <- array(0, dim=c(tt,tv0,3,11)) # Newly exposed in VAef by day
Expv2 <- array(0, dim=c(tt,tt,3,11))

New.explosv1 <- array(0, dim=c(tt,3,11)) # Newly exposed due to loss immunity in vaccinated
New.explosrec <- array(0, dim=c(tt,3,11)) # Newly exposed due to loss immunity in recovered

New.vac <- array(0, dim=c(tt,3,11)) # Newly vaccinated

New.sym <- array(0, dim=c(tt,3,11)) # New symptomatic

eSeed <- array(0, dim=c(tt,dd,3,11)) # Seeds of exposed
Seed.all <- array(0, dim=c(tt,3,11)) # Seeds of exposed

CMTa <- array(0, dim=c(11,11)) # Contact matrix by age for all contacts symmetric
CMTTh <- array(0, dim=c(11,11)) # Contact matrix by age for home contacts symmetric

adjCNTa <- array(0, dim=c(tt,11)) # adjust no. of Contacts at home by age & m

```

```

V.day <- array(0, dim=c(18,7)) # no. of days for vaccination (age grp 1-6)
V.dmax <- array(0, dim=c(18,7)) # maximum vaccinated per day by age grp (1-6)
T.vac <- array(0, dim=c(18,7)) # maximum vaccinated per day by age grpe (1-6)
vacend <- array(0, dim=c(18,7)) # End date for vaccinating group Vp

## READ: data on initial population 01-01-2020

inPOP <- read.table(file="...\\inPOPEng20.csv", header=TRUE, sep=",")

# Obtain data on initial population in England 2020 (start of the year)

for(a in 1:10) { # Input UK population

  N[1,1,a] <- inPOP[a,3]*1000 # male all
  N[1,2,a] <- inPOP[a,4]*1000 # female all

  drisk.inf[1,a] <- inPOP[a,5] # case fatality male
  drisk.inf[2,a] <- inPOP[a,6] # case fatality female

  rHosp[a] <- inPOP[a,7] # Hospitalisation rate (cases)

} # End input POP data

#-----
for(s in 1:2) {
  for(a in 1:10) {
    N[1,3,11] <- N[1,3,11] + N[1,s,a]; N[1,s,11] <- N[1,s,11] + N[1,s,a]; N[1,3,a] <- N[1,3,a] + N[1,s,a]
    SU[1,s,a] <- N[1,s,a]; SU[1,3,11] <- SU[1,3,11] + SU[1,s,a]
  }
}

##=====
## Birth related parameters, note: CMB[s,a]
##=====
dBth[1] <- 1800 # No. of births per day; for day-1 only
# dBth =no. of deaths/day for other days
Bsex[1] <- 0.512 # male %
Bsex[2] <- 0.488 # female %

## READ: data on 5 year (2015-2019) average death rate/1000/day

inAllDth <- read.table(file="...\\inDTH1519Eng10.csv", header=TRUE, sep=",")
d <- 1 # day from 1 to 364=7x52
for(w in 1:52) { # Input death rate for male week 1-52
  for(dw in 1:7) {
    for(a in 1:10) {
      cc <- a+1
      rADth0[d,1,a] <- inAllDth[w,cc]/1000
    } # end a in 1:10
    d <- d+1
  } # end for dw in 1:7
} # end for w in 1:52
d <- 1 # day from 1 to 364=7x52
for(w in 53:104) { # Input death rate for female week 1-52
  for(dw in 1:7) {
    for(a in 1:10) {
      cc <- a+1
      rADth0[d,2,a] <- inAllDth[w,cc]/1000
    } # end a in 1:10
    d <- d+1
  }
}

for(s in 1:2) {
  for(a in 1:10) {
    rADth0[365,s,a] <- rADth0[364,s,a] # 366 days in 2020
    rADth0[366,s,a] <- rADth0[364,s,a] # 366 days in 2020
  }
}

```

```

    }

## READ: contact matrix all and at home
inCM <-read.table(file="...\\inCMATRIX10.csv", header=TRUE, sep=",")

for(a in 1:10) { # Input Contact matrix data
for(j in 1:10) {
# All contacts (for community transmission)
ca <-j+1
CMTa[a,j] <-inCM[a,ca]
# Contacts at home (for home isolation)
ch <-j+11
CMTh[a,j] <-inCM[a,ch]
}
}

##-----
## Key input parameters
##-----
# % of mild illness among infected - age-specific, constant overtime
# Data source: Davies et al Nature Med: Age-dependent effects in transmission
for(a in 1:2) { rFm[a] <- 0.71 } # age 0-9
rFm[3] <- 0.79 # age 10-19
rFm[4] <- 0.73 # age 20-29
rFm[5] <- 0.67 # age 30-39
rFm[6] <- 0.60 # age 40-49
rFm[7] <- 0.51 # age 50-59
rFm[8] <- 0.37 # age 60-69
for(a in 9:10) { rFm[a] <- 0.31 } # age 70+

#-----
# Verity et al:
# 17.8 days from onset to deaths

gdth.m <-23.0 # mean days from exposed to deaths
gdth.s <-4.796 # sd

# READ: data on other input parameters

inParam <-read.table(file="...\\inParamet20.csv", header=TRUE, sep=",")

for(t in ts:tt) { # Epidemic simulation starts from ts
if(t>(ts-1)) { ### t>ts
c <-2 # data column
}

#=====
# Effects of NPI control measures
#-----
# Control-1: case based self-isolation mandated on 12/03/2020
# Reduced infectious periods for symptomatic patients since 13/03/2020
#-----
if(t>72) { # after date: 12/03/2020 -self isolation of symptomatic individuals
c <-3
}

#-----
# Control-2: Social distance encouraged in the UK 16/03/2020
# shielding of vulnerable people
#-----
if(t>76) { # After date 16/03/2020 -social distance
c <-4
}

#=====
# Control-3: lockdown from 24/03/2020 in the UK; stay at home and other restrictions
#-----
if(t>83) { # lockdown initial
c <-5
}

#=====
# On 4 July 2020: third step in easing national restrictions

```



```

# including 2m => 2m or 1m social distancing, restaurants/pubs
# reopening, holiday accommodations, museum, place of worships, ...
#=====
    if(t>186) {          # date: 04/07/2020 more shops/pubs open
      c <-6
    }
#=====
# Reopening of schools from September 2020
#=====
    if(t>244) {          # date: 01/09/2020 more shops/pubs re-opening
      c <-7
    }
#=====
# 2nd national restrictions
#-----
    if(t>309) {          # Date: 05/11/2020 localised control measures
      c <-8
    }
#=====
# Lifting national restrictions
#-----
    if(t>336) {          # Date: 02/12/2020 Lifting national restrictions
      c <-9
    }
#=====
# National lockdown restrictions
#-----
    if(t>370) {          # Date: 05/01/2021 National restrictions
      c <-10
    }
#=====
# Partial lifting national lockdown restrictions
#-----
    if(t>432) {          # t=440: 15/03/2021; partially lifting national restrictions
      c <-11
    }
    if(t>505) {          # t=506: 20/05/2021
      c <-12
    }
#=====
# Return to normal from back.tim
#-----
    if(back.nom==1) {
      if(t>(back.tim-1)) {
        c <-13
      }
    }
#====

### Get data from dataframe "inPar"
# % home quarantine among symptomatic cases

for(a in 1:6) { # age 0-49
  rFsq[t,a] <- inParam[1,c]
}
for(a in 7:8) { # age 50-69
  rFsq[t,a] <- inParam[2,c]
}
for(a in 9:10) { # age 70+
  rFsq[t,a] <- inParam[3,c]
}

#-----
# Transition parameters for E-I0-TM/S-QM/S-RE
# gamma distribution mean and shape
#-----

alp1.m <- inParam[4,c] # gamma mean -days incupation non-infectious period
alp1.s <- inParam[5,c] # gamma sd
alp2.m <- inParam[6,c] # gamma mean -infectiou duration before symptomatic
alp2.s <- inParam[7,c] # gamma sd

```

```

gm0.m[t] <-inParam[8,c] # mean days infectious period- no quarantine -mild
gm0.s[t] <-inParam[9,c] # gamma sd

gs0.m[t] <-inParam[10,c] # mean duration of infectious no quarantine -severe
gs0.s[t] <-inParam[11,c] # gamma sd

gs1.m[t] <-inParam[12,c] # mean days of infectious before quarantine -severe
gs1.s[t] <-inParam[13,c] # gamma sd
gs2.m[t] <-inParam[14,c] # mean duration from quarantine to recovery -severe
gs2.s[t] <-inParam[15,c] # gamma sd

gh1.m[t] <-inParam[16,c] # mean days before hospitalisation -severe
gh1.s[t] <-inParam[17,c] # gamma sd
gh2.m[t] <-inParam[18,c] # mean days of non-ICU hospitalisation -severe
gh2.s[t] <-inParam[19,c] # gamma sd

#-----
# adjCNT=1, no change; adjCNT<1, reduced contacts
#-----
for(a in 1:3) { # Age 0-19 children
  adjCNTa[t,a] <- inParam[20,c]
}
for(a in 4:7) { # Age 20-59
  adjCNTa[t,a] <- inParam[21,c]
}
for(a in 8:8) { # Age 60-69
  adjCNTa[t,a] <- inParam[22,c]
}
for(a in 9:10) { # Age 70+
  adjCNTa[t,a] <- inParam[23,c]
}

} ## End tt for input parameters

#-----
# Hospitalisation rate by age grp based on Verity et al.
for(t in 1:tt) {
  for(a in 1:10) {
    rFhos[t,a] <-(rHosp[a]/(1-rFm[a])) *adjHsp[t]
  }
}

#=====
# Calculating transition rate by days since exposed, infected, ...
# cumulative (pgamma) from 1 to dd: eventually all will be transferred to next status ....
#=====
for(d in 1:dd) {
  cum_alp1[d] <- pgamma(d, (alp1.m/alp1.s)^2, scale=(alp1.s^2)/alp1.m, log=FALSE)
  cum_alp2[d] <- pgamma(d, (alp2.m/alp2.s)^2, scale=(alp2.s^2)/alp2.m, log=FALSE)
  cum_gdth.inf[d] <- pgamma(d, (gdth.m/gdth.s)^2, scale=(gdth.s^2)/gdth.m, log=FALSE)
}

# Translating cumulative probability to transition rate by d
alp1[1] <- cum_alp1[1]
alp2[1] <- cum_alp2[1]
gdth.inf[1] <- cum_gdth.inf[1]
for(d in 2:dd) {
  if(cum_alp1[d-1]<1) {
    alp1[d] <- (cum_alp1[d]-cum_alp1[d-1])/(1-cum_alp1[d-1])
  } else { alp1[d] <-1 }

  if(cum_alp2[d-1]<1) {
    alp2[d] <- (cum_alp2[d]-cum_alp2[d-1])/(1-cum_alp2[d-1])
  } else { alp2[d] <-1 }

  if(cum_gdth.inf[d-1]<1) {
    gdth.inf[d] <- (cum_gdth.inf[d]-cum_gdth.inf[d-1])/(1-cum_gdth.inf[d-1])
  } else { gdth.inf[d] <-1 }
}

```

```

for(t in ts:tt)      {      # start t in 1:tt

for(d in 1:dd)      {      # start d in 1:dd
cum_gam.m0[t,d] <- pgamma(d, (gm0.m[t]/gm0.s[t])^2, scale=gm0.s[t]^2/gm0.m[t], log=FALSE)

cum_gam.s0[t,d] <- pgamma(d, (gs0.m[t]/gs0.s[t])^2, scale=gs0.s[t]^2/gs0.m[t], log=FALSE)
cum_gam.s1[t,d] <- pgamma(d, (gs1.m[t]/gs1.s[t])^2, scale=gs1.s[t]^2/gs1.m[t], log=FALSE)
cum_gam.s2[t,d] <- pgamma(d, (gs2.m[t]/gs2.s[t])^2, scale=gs2.s[t]^2/gs2.m[t], log=FALSE)

cum_gam.h1[t,d] <- pgamma(d, (gh1.m[t]/gh1.s[t])^2, scale=gh1.s[t]^2/gh1.m[t], log=FALSE)
cum_gam.h2[t,d] <- pgamma(d, (gh2.m[t]/gh2.s[t])^2, scale=gh2.s[t]^2/gh2.m[t], log=FALSE)
}      # end d in 1:dd

gam.m0[t,1] <- cum_gam.m0[t,1]; gam.s0[t,1] <- cum_gam.s0[t,1]; gam.s1[t,1] <- cum_gam.s1[t,1]
gam.s2[t,1] <- cum_gam.s2[t,1]; gam.h1[t,1] <- cum_gam.h1[t,1]; gam.h2[t,1] <- cum_gam.h2[t,1]

for(d in 2:dd)      {      # start d in 2:dd

      if(cum_gam.m0[t,d-1]<1)      {
gam.m0[t,d] <- (cum_gam.m0[t,d]-cum_gam.m0[t,d-1])/(1-cum_gam.m0[t,d-1])
      } else {      gam.m0[t,d]<-1      }
      if(cum_gam.s0[t,d-1]<1)      {
gam.s0[t,d] <- (cum_gam.s0[t,d]-cum_gam.s0[t,d-1])/(1-cum_gam.s0[t,d-1])
      } else {      gam.s0[t,d]<-1      }
      if(cum_gam.s1[t,d-1]<1)      {
gam.s1[t,d] <- (cum_gam.s1[t,d]-cum_gam.s1[t,d-1])/(1-cum_gam.s1[t,d-1])
      } else {      gam.s1[t,d]<-1      }
      if(cum_gam.s2[t,d-1]<1)      {
gam.s2[t,d] <- (cum_gam.s2[t,d]-cum_gam.s2[t,d-1])/(1-cum_gam.s2[t,d-1])
      } else {      gam.s2[t,d]<-1      }
      if(cum_gam.h1[t,d-1]<1)      {
gam.h1[t,d] <- (cum_gam.h1[t,d]-cum_gam.h1[t,d-1])/(1-cum_gam.h1[t,d-1])
      } else {      gam.h1[t,d]<-1      }
      if(cum_gam.h2[t,d-1]<1)      {
gam.h2[t,d] <- (cum_gam.h2[t,d]-cum_gam.h2[t,d-1])/(1-cum_gam.h2[t,d-1])
      } else {      gam.h2[t,d]<-1      }
      }      # end d in 2:dd

#-----
# Average transition rates for estimating Rt.
# Average transition rates were estimated by exponential distribution,
#-----
      alp2.a <- (1/alp2.m)/1.337      # gamma m=1.5
      gam.m0a[t] <- (1/gm0.m[t])/1.11      # gamma m=5
      gam.s0a[t] <- (1/gs0.m[t])/1.11      # gamma m=5
      gam.s1a[t] <- (1/gs1.m[t])/1.25      # gamma m=2
      gam.s2a[t] <- (1/gs2.m[t])/1.125      # gamma m=4
      gam.h1a[t] <- (1/gh1.m[t])/1.25      # gamma m=2
      }      # end t in 1:tt

#-----
# Distribution of immunity duration:
for(w in 1:tw0)      {      # start w in 1:tw
cum_gimm.wan[w] <- pgamma(w, (gwan.m/gwan.s)^2, scale=gwan.s^2/gwan.m, log=FALSE)
      }      # end w in 1:tw

      gimm.wan[1] <- cum_gimm.wan[1]

for(w in 2:tw0)      {
      if(cum_gimm.wan[w-1]<1) {
gimm.wan[w] <- (cum_gimm.wan[w]-cum_gimm.wan[w-1])/(1-cum_gimm.wan[w-1])
      } else {      gimm.wan[w]<-1      }
      }

if(pIM==1)      {      # If permanent immunity -gimm.wan=0
for(w in 1:tw0)      {
      gimm.wan[w] <- 0.0
      }
      }      # end if pIM=1

```

```

# Distribution of vaccine immunity duration:

for(w in 1:tw0) { # start w in 1:tw
cum_gimmv.wan[w] <- pgamma(w, (gwanv.m/gwanv.s)^2, scale=gwanv.s^2/gwanv.m, log=FALSE)
} # end w in 1:tw

gimmv.wan[1] <- cum_gimmv.wan[1]

for(w in 2:tw0) {
  if(cum_gimmv.wan[w-1]<1) {
gimmv.wan[w] <- (cum_gimmv.wan[w]-cum_gimmv.wan[w-1])/(1-cum_gimmv.wan[w-1])
  } else { gimmv.wan[w] <-1 }
}

if(pIMv==1) { # If permanent vaccine immunity -gimm.wan=0
for(w in 1:tw0) {
  gimmv.wan[w] <- 0.0
}
} # end if pIMv=1

##=====
## Simulation of covid-19 epidemic
##=====
for(t in 2:tt) { ##### Start simulation
#=====
# Seasonality adjustment of beta[t]

if(t>639) { # From Sept 2021
  beta[t]<- bta.nom
if(t.dr >240) { # from about Sept
if(t.dr <301) { # to about Oct
beta[t]<- bta.nom *rWinter1 # beta increased by rWinter
}
}
if(t.dr >300) { # from Nov to Dec
beta[t]<- bta.nom *rWinter2 # beta increased by rWinter
}
if(t.dr <60) { # From Jan to Feb
beta[t]<- bta.nom *rWinter2 # beta increased by rWinter
}
if(t.dr >59) { # from Mar
if(t.dr <120) { # to about Apr
beta[t]<- bta.nom *rWinter1 # beta increased by rWinter
}
}
} # end t>639

#=====
# Days of the year for non-covid death rate
#=====
if(t==2) { t.dr <-1 } # start year 1
if(t==368) { t.dr <-1 } # start year 2
if(t==733) { t.dr <-1 } # start year 3
if(t==1098) { t.dr <-1 } # start year 4
if(t==1463) { t.dr <-1 } # start year 5
if(t==1828) { t.dr <-1 } # start year 6
if(t==2193) { t.dr <-1 } # start year 7
if(t==2558) { t.dr <-1 } # start year 8
if(t==2923) { t.dr <-1 } # start year 9
if(t==3288) { t.dr <-1 } # start year 10

#=====
# First running through t from 1 to ts a period of no covid epidemic

if(t<ts) { ##### The susceptible from t=1 to t=ts
for(a in 1:10) {
for(s in 1:2) {
N[t,s,a] <- N[t-1,s,a]*(1-rADth0[t.dr,s,a]) +dBth[a]*Bsex[s]; SU[t,s,a] <- N[t,s,a]
}
}
}

```

```

    } }
  } ##### end if t<ts

#####
# Simulating from ts to tt for covid epidemic
#####
if(t==ts) {
  eSeed[ts,3,1,5] <- seeds
  for(a in 1:10) {
    for(s in 1:2) {
      for(m in 1:2) {
        N[t,s,a] <-N[t-1,s,a]*(1-rADth0[t,dr,s,a]) +dBth[a]*Bsex[s]; SU[t,s,a] <-N[t,s,a]
        for(d in 1:10) {
          Seed.all[t,s,a] <-Seed.all[t,s,a] +eSeed[t,d,s,a]
        }
      } }
    } # end if t==ts
  }

#####
if(t>ts) { ##### start simulating covid epidemic

# Seeding exposed per day from 15/01/2020 to 29/02/2020 (t=60)
if(t<40) { eSeed[t,3,1,5] <- eSeed[t-1,3,1,5] +1 }

  for(a in 1:10) {
    for(s in 1:2) {
      for(d in 1:10) {
        Seed.all[t,s,a] <-Seed.all[t,s,a] +eSeed[t,d,s,a]
      }
    }
  }

#####
# Average rFm & rFhos for estimating R0/Rt: weighted by age specific proportion of relevant cases

  for(a in 1:10) {
    rFsq.al[t-1] <- rFsq.al[t-1]+ rFsq[t-1,a]*N[t-1,3,a]/N[t-1,3,11]
    rFm.al[t-1] <- rFm.al[t-1] + rFm[a]*N[t-1,3,a]/N[t-1,3,11]
    rFhos.al[t-1] <-rFhos.al[t-1] +rFhos[t-1,a]*N[t-1,3,a]/N[t-1,3,11]
  } # end a in 1:10

#####
# Overall infectious individuals in the population

  for(a in 1:10) {
    for(s in 1:2) {
      I.i0[t-1,a] <-I.i0[t-1,a] +I0[t-1,s,a] # pre-clinical infectious
      I.i0v[t-1,a] <-I.i0v[t-1,a] +I0v1[t-1,s,a] +I0v2[t-1,s,a]
      I.m0[t-1,a] <- I.m0[t-1,a] +IM0[t-1,s,a]
      I.m[t-1,a] <- I.m[t-1,a] +IM0[t-1,s,a] +I0[t-1,s,a]*rFm[a] # All asymptomatic/mild cases
      I.m0v[t-1,a] <-I.m0v[t-1,a] + IM0v[t-1,s,a]
      I.mv[t-1,a] <- I.mv[t-1,a] + IM0v[t-1,s,a] +
        I0v1[t-1,s,a]*(1-(1-rVEsym1)*(1-rFm[a])) +
        I0v2[t-1,s,a]*(1-(1-rVEsym2)*(1-rFm[a])) # Among asym/mild: vaccinated and
        # after immunity waning in the recovered
      I.sq[t-1,a] <-I.sq[t-1,a] +QS[t-1,s,a]
      I.sqv[t-1,a] <-I.sqv[t-1,a] +QSV[t-1,s,a]
      I.s0[t-1,a] <-I.s0[t-1,a] +IS0[t-1,s,a]+ISq[t-1,s,a]+ISh[t-1,s,a]
      I.s[t-1,a] <- I.s[t-1,a] +IS0[t-1,s,a]+ISq[t-1,s,a]+ISh[t-1,s,a] +I0[t-1,s,a]*(1-rFm[a])

      I.s0v[t-1,a] <-I.s0v[t-1,a] +IS0v[t-1,s,a]+ISqv[t-1,s,a]+IShv[t-1,s,a]
      I.sv[t-1,a] <- I.sv[t-1,a] +IS0v[t-1,s,a]+ISqv[t-1,s,a]+IShv[t-1,s,a] +
        I0v1[t-1,s,a] *(1-rVEsym1)*(1-rFm[a]) +
        I0v2[t-1,s,a] *(1-rVEsym2)*(1-rFm[a])
    }
  }

#####
# Estimating average no. of daily transmission per infectious individuals for estimating R0/Rt

```

```

for(a in 1:10) {
for(j in 1:10) {
#-----
  li0 <-(I.i0[t-1,j]+I.i0v[t-1,j])
  if(li0>0) {
  rli0 <-(I.i0[t-1,j]+I.i0v[t-1,j]*InfI2)/(I.i0[t-1,j]+I.i0v[t-1,j])
  } else { rli0 <-1 }
beta2.i0[t-1] <-beta2.i0[t-1] +(beta[t-1]*CMTa[a,j]*adjCNTa[t-1,a]*
  N[t-1,3,j]/N[t-1,3,11]) *(rFm[a]*ASYinf +(1-rFm[a])) *rli0
#-----
  Im0 <-(I.m0[t-1,j]+I.m0v[t-1,j])
  if(Im0>0){
  rIm0 <-(I.m0[t-1,j]+I.m0v[t-1,j]*InfI2)/(I.m0[t-1,j]+I.m0v[t-1,j])
  } else { rIm0 <-1 }
beta2.m0[t-1] <-beta2.m0[t-1] +(beta[t-1]*CMTa[a,j]*adjCNTa[t-1,a]*
  N[t-1,3,j]/N[t-1,3,11]) *ASYinf * rIm0
#-----
  Is0 <-(I.s0[t-1,j]+I.s0v[t-1,j])
  if(Is0>0) {
  rIs0 <-(I.s0[t-1,j]+I.s0v[t-1,j]*InfI2)/(I.s0[t-1,j]+I.s0v[t-1,j])
  } else { rIs0 <-1 }
beta2.s0[t-1] <-beta2.s0[t-1] +(beta[t-1]*CMTa[a,j]*adjCNTa[t-1,a]*
  N[t-1,3,j]/N[t-1,3,11]) * rIs0
#-----
  Isq <-(I.sq[t-1,j]+I.sqv[t-1,j])
  if(Isq>0) {
  rIsq <-(I.sq[t-1,j]+I.sqv[t-1,j]*InfI2)/(I.sq[t-1,j]+I.sqv[t-1,j])
  } else { rIsq <-1 }
beta2.sq[t-1] <-beta2.sq[t-1] +(beta[t-1]*CMTa[a,j]*
  N[t-1,3,j]/N[t-1,3,11]) * rIsq
  }
}

#-----
# transition rate from I0 to IM0, etc.
#-----
dk[t-1,1] <-alp2.a* rFm.al[t-1] # To IM0
dk[t-1,2] <-alp2.a*(1-rFm.al[t-1])*(1-rFhos.al[t-1])*(1-rFsq.al[t-1]) # To IS0
dk[t-1,3] <-alp2.a*(1-rFm.al[t-1])*(1-rFhos.al[t-1])* rFsq.al[t-1] # To ISq
dk[t-1,4] <-alp2.a*(1-rFm.al[t-1])* rFhos.al[t-1] # To ISh

for(k in 1:4) { dA[t-1] <-dA[t-1] +dk[t-1,k] }

dk[t-1,5] <-alp2.a*(1-(1-rVEsym1)*(1-rFm.al[t-1])) # To IM0v
dk[t-1,6] <-alp2.a* (1-rVEsym1)*(1-rFm.al[t-1])*(1-rFhos.al[t-1])*(1-rFsq.al[t-1]) # To IS0v
dk[t-1,7] <-alp2.a* (1-rVEsym1)*(1-rFm.al[t-1])*(1-rFhos.al[t-1])* rFsq.al[t-1] # To ISqv
dk[t-1,8] <-alp2.a* (1-rVEsym1)*(1-rFm.al[t-1])* rFhos.al[t-1] # To IShv

for(k in 5:8) { dAv1[t-1] <-dAv1[t-1] +dk[t-1,k] }

dk[t-1,9] <-alp2.a*(1-(1-rVEsym2)*(1-rFm.al[t-1])) # To IM0v
dk[t-1,10] <-alp2.a* (1-rVEsym2)*(1-rFm.al[t-1])*(1-rFhos.al[t-1])*(1-rFsq.al[t-1]) # To IS0v
dk[t-1,11] <-alp2.a* (1-rVEsym2)*(1-rFm.al[t-1])*(1-rFhos.al[t-1])* rFsq.al[t-1] # To ISqv
dk[t-1,12] <-alp2.a* (1-rVEsym2)*(1-rFm.al[t-1])* rFhos.al[t-1] # To IShv

for(k in 9:12) { dAv2[t-1] <-dAv2[t-1] +dk[t-1,k] }

#=====
# Estimating R0 and effective Rt
#-----

Rt[t-1] <- ((SU[t-1,3,11]+VA0[t-1,3,11])/N[t-1,3,11]) *
(beta2.i0[t-1] /dA[t-1]) +
beta2.m0[t-1]*dk[t-1,1] /dA[t-1]*gam.m0a[t-1]) +
beta2.s0[t-1]*dk[t-1,2] /dA[t-1]*gam.s0a[t-1]) +
beta2.s0[t-1]*dk[t-1,3] /dA[t-1]*gam.s1a[t-1]) +
beta2.sq[t-1]*dk[t-1,3]*gam.s1a[t-1] /dA[t-1]*gam.s2a[t-1]) +
beta2.s0[t-1]*dk[t-1,4] /dA[t-1]*gam.h1a[t-1]) +
(VAef1[t-1,3,11]/N[t-1,3,11])*(1-rVEinf1) *
(beta2.i0[t-1] /dAv1[t-1]) +

```

```

beta2.m0[t-1]*dk[t-1,5]      /(dAv1[t-1]*gam.m0a[t-1]) +
beta2.s0[t-1]*dk[t-1,6]      /(dAv1[t-1]*gam.s0a[t-1]) +
beta2.s0[t-1]*dk[t-1,7]      /(dAv1[t-1]*gam.s1a[t-1]) +
beta2.sq[t-1]*dk[t-1,7]*gam.s1a[t-1] /(dAv1[t-1]*gam.s2a[t-1]) +
beta2.s0[t-1]*dk[t-1,8]      /(dAv1[t-1]*gam.h1a[t-1]) +
(VAef2[t-1,3,11]/N[t-1,3,11])*(1-rVEinf2) *
(beta2.i0[t-1]                /(dAv2[t-1])                +
beta2.m0[t-1]*dk[t-1,9]      /(dAv2[t-1]*gam.m0a[t-1]) +
beta2.s0[t-1]*dk[t-1,10]     /(dAv2[t-1]*gam.s0a[t-1]) +
beta2.s0[t-1]*dk[t-1,11]     /(dAv2[t-1]*gam.s1a[t-1]) +
beta2.sq[t-1]*dk[t-1,11]*gam.s1a[t-1] /(dAv2[t-1]*gam.s2a[t-1]) +
beta2.s0[t-1]*dk[t-1,12]     /(dAv2[t-1]*gam.h1a[t-1]) +
(SU.vac[t-1,3,11] +SU.rec[t-1,3,11])/N[t-1,3,11] *
(beta2.i0[t-1]                /(dAv2[t-1])                +
beta2.m0[t-1]*dk[t-1,9]      /(dAv2[t-1]*gam.m0a[t-1]) +
beta2.s0[t-1]*dk[t-1,10]     /(dAv2[t-1]*gam.s0a[t-1]) +
beta2.s0[t-1]*dk[t-1,11]     /(dAv2[t-1]*gam.s1a[t-1]) +
beta2.sq[t-1]*dk[t-1,11]*gam.s1a[t-1] /(dAv2[t-1]*gam.s2a[t-1]) +
beta2.s0[t-1]*dk[t-1,12]     /(dAv2[t-1]*gam.h1a[t-1]))

#-----
# Susceptible infected by contacting infectious individuals with any age-sex
# not quarantined or household isolated in the whole population
#-----

for(s in 1:2)      {
for(a in 1:10)     {
for(j in 1:10)    {

# Temporary variable:
ConInf <- CMTa[a,j]*adjCNTa[t-1,a] *
(ASYinf *(I.m[t-1,j] +InfI2 *I.mv[t-1,j]) +I.s[t-1,j] +InfI2 *I.sv[t-1,j])/N[t-1,3,j] +
CMTh[a,j] * (I.sq[t-1,j] +InfI2 *I.sqv[t-1,j])/N[t-1,3,j]

# Exposed from susceptible
New.expsu[t-1,s,a] <-New.expsu[t-1,s,a] + beta[t-1] *SU[t-1,s,a] *ConInf
} # end age j
SU[t-1,s,a] <- SU[t-1,s,a] -New.expsu[t-1,s,a]
}
}

#-----
for(s in 1:2)      {
for(v in 1:dv0)    {
for(a in 1:10)     {
for(j in 1:10)    {

# Temporary variable:
ConInf <- CMTa[a,j]*adjCNTa[t-1,a] *
(ASYinf *(I.m[t-1,j] +InfI2 *I.mv[t-1,j]) +I.s[t-1,j] +InfI2 *I.sv[t-1,j])/N[t-1,3,j] +
CMTh[a,j] * (I.sq[t-1,j] +InfI2 *I.sqv[t-1,j])/N[t-1,3,j]

# Exposed in early vaccinated (<14 days):
Expv0.temp <- beta[t-1] *eVA0[t-1,v,s,a] *ConInf
Expv0[t-1,v,s,a] <- Expv0[t-1,v,s,a] +Expv0.temp
eVA0[t-1,v,s,a] <- eVA0[t-1,v,s,a] -Expv0.temp
}
New.expv0[t-1,s,a] <-New.expv0[t-1,s,a] +Expv0[t-1,v,s,a]
}
}
}

#-----
for(s in 1:2)      {
for(w in 1:tv0)    {
for(a in 1:10)     {
for(j in 1:10)    {

# Temporary variable:

```

```

ConInf <- CMTa[a,j]*adjCNTa[t-1,a] *
  (ASYinf*(L.m[t-1,j] +InfI2 *L.mv[t-1,j]) +I.s[t-1,j] +InfI2 *I.sv[t-1,j])/N[t-1,3,j] +
  CMTh[a,j]* (L.sq[t-1,j] +InfI2 *L.sqv[t-1,j])/N[t-1,3,j]

# Exposed in vaccinated dose-1 (risk reduced by "1-rVEinf1"):
Expv1.temp <- beta[t-1] *eVAef1[t-1,w,s,a] *ConInf *(1-rVEinf1)
Expv1[t-1,w,s,a] <-Expv1[t-1,w,s,a] + Expv1.temp
eVAef1[t-1,w,s,a] <- eVAef1[t-1,w,s,a] -Expv1.temp
}
New.expv1[t-1,s,a] <-New.expv1[t-1,s,a] +Expv1[t-1,w,s,a]
}
}

#-----
for(s in 1:2) {
  tv1<-(t-vac.tim[1]); if(tv1<2) { tv1<-2 }
for(w in 1:tv1) {
for(a in 1:10) {
for(j in 1:10) {

# Temporary variable:
ConInf <- CMTa[a,j]*adjCNTa[t-1,a] *
  (ASYinf*(L.m[t-1,j] +InfI2 *L.mv[t-1,j]) +I.s[t-1,j] +InfI2 *I.sv[t-1,j])/N[t-1,3,j] +
  CMTh[a,j]* (L.sq[t-1,j] +InfI2 *L.sqv[t-1,j])/N[t-1,3,j]

# Exposed in vaccinated dose-2 (risk reduced by "1-rVEinf2"):
Expv2.temp <- beta[t-1] *eVAef2[t-1,w,s,a] *ConInf *(1-rVEinf2)
Expv2[t-1,w,s,a] <-Expv2[t-1,w,s,a] + Expv2.temp
eVAef2[t-1,w,s,a] <- eVAef2[t-1,w,s,a] -Expv2.temp
}
New.expv2[t-1,s,a] <-New.expv2[t-1,s,a] +Expv2[t-1,w,s,a]
}
}

#-----

for(s in 1:2) {
for(a in 1:10) {
for(j in 1:10) {

# Temporary variable:
ConInf <- CMTa[a,j]*adjCNTa[t-1,a] *
  (ASYinf*(L.m[t-1,j] +InfI2 *L.mv[t-1,j]) +I.s[t-1,j] +InfI2 *I.sv[t-1,j])/N[t-1,3,j] +
  CMTh[a,j]* (L.sq[t-1,j] +InfI2 *L.sqv[t-1,j])/N[t-1,3,j]

# Exposed due to loss of immunity in vaccinated/recovered (risk fraction: "rLOSinf"):
New.explosv1[t-1,s,a] <- New.explosv1[t-1,s,a] + beta[t-1] *(SU.vac[t-1,s,a]) *ConInf
New.explosrec[t-1,s,a] <- New.explosrec[t-1,s,a] + beta[t-1] *(SU.rec[t-1,s,a]) *ConInf
}

SU.vac[t-1,s,a] <-SU.vac[t-1,s,a] - New.explosv1[t-1,s,a]
SU.rec[t-1,s,a] <-SU.rec[t-1,s,a] -New.explosrec[t-1,s,a]
}
}

#####

if(VAC==1) { ### Vaccination yes=1 or no=0

#=====
# Total vaccinated and days required to complete vaccination
if(t <vac.tim[1]+1) { Vtru<-0; Vp<-7; Rv<-0 } # Vtru: vaccination true-1 or false-0
for(rev in 1:nRvac) { # from 1 to nRvac -no. of vac programs
if(t==(vac.tim[rev]+1)) {
  Vtru <-1; Vp <-1; Rv <-rev
  T.vac[Rv,1] <- vac.tim[rev] +1 # T.vac starting time for age Vp==1
}
}
}

```



```

} # end for rev in 1:nRvac
=====
if( Vtru==1) {
#-----
for(nVp in 2:6) {
  if(t==T.vac[Rv,nVp]) { Vp <-nVp }
}
#-----
Totalvac <-0
#-----

vacrg <-vac.crg4 # if Vp<4: age 50+

if(Vp==6) {
if(Rv==1) { vacrg <-vac.crg1*0.4 } # 16-19 in 10-19
if(Rv >1) { vacrg <-vac.crg1*0.1 } # new 16 in 10-19
} # end if Vp=6

if(Vp==5) {
vacrg <-vac.crg2 # age 20-39
} # end if Vp=5

if(Vp==4) {
vacrg <-vac.crg3 # age 40-49
} # end if Vp=4

#-----

for(a in vagp[Vp,1]:vagp[Vp,2]) { # a from low to high age limit
for(s in 1:2) { # s in 1:2

# Vaccinated among SU, RE, and lost immunity:
# In not-exposed only

Totalvac <-Totalvac + (SU[t-1,s,a] + RE[t-1,s,a] +SU.vac[t-1,s,a] +SU.rec[t-1,s,a] ) *vacrg

# vaccination of people vaccinated for at least 91 days (3 months)

vcrg <- vacrg
if(Vp==6) { vcrg <- vac.crg1 }
if(Rv>1) {
for(w in 91:t) {
Totalvac <- Totalvac + eVAef2[t-1,w,s,a] *vcrg
} # end Rv>1
} # end s
} # end a

#-----

if( t==T.vac[Rv,Vp] ) { # Fixing V.day, V.dmax, vacend estimates at T.vac[Rv,Vp]
V.day[Rv,Vp] <- round(Totalvac/vac.dmaxi) +1 # V.day: no. of days required for Vp phase
V.dmax[Rv,Vp] <-Totalvac/V.day[Rv,Vp] # Totalvac at the 1st day of a vac phase
vacend[Rv,Vp] <- T.vac[Rv,Vp] +V.day[Rv,Vp] -1
if(Vp<6) { T.vac[Rv,Vp+1] <-vacend[Rv,Vp] +1 }
} # end if t==T.vac

#-----

} # end if Vtru==1
} # end if VAC==1

=====
# Estimating VA, SU, EX, I, and RE, hospitalised, ICU, and no. of tests required

for(s in 1:2) { ### sex male-1, female-2
for(a in 1:10) { ### age group 1-10

if(VAC==1) { # Vaccination: 1=yes or 0=no

```

```

    if(Vtru==1)      {
    if(Vp<(vac.AGP[Rv]+1) ) {      # only apply to Vp 1-6
#-----
        vaccrg <-vac.crg4          # if Vp<4: age 50+

    if(Vp==6)      {
    if(Rv==1) { vaccrg <-vac.crg1*0.4 } # 18-19 in 10-19
    if(Rv >1) { vaccrg <-vac.crg1*0.1 } # new 16 in 10-19
                }      # end if Vp=6
    if(Vp==5)      {
        vaccrg <-vac.crg2 # age 20-39
                }      # end if Vp=5
    if(Vp==4)      {
        vaccrg <-vac.crg3 # age 40-49
                }      # end if Vp=4
#-----
    if(a>vagp[Vp,1]-1) {
    if(a<vagp[Vp,2]+1){

# Vaccinating susceptible
#-----
        vac.SU[t-1,s,a] <- V.dmax[Rv,Vp] *(SU[t-1,s,a]*vaccrg)/Totalvac
    if(vac.SU[t-1,s,a]>SU[t-1,s,a]) { vac.SU[t-1,s,a] <-SU[t-1,s,a]*vaccrg }
        SU[t-1,s,a] <-SU[t-1,s,a] -vac.SU[t-1,s,a]
        New.vac[t-1,s,a] <- vac.SU[t-1,s,a]

# Vaccinating loss of immunity in vaccinated
#-----
        vac.SUvac[t-1,s,a] <- V.dmax[Rv,Vp] *(SU.vac[t-1,s,a]*vaccrg)/Totalvac
    if(vac.SUvac[t-1,s,a]>SU.vac[t-1,s,a]) { vac.SUvac[t-1,s,a] <-SU.vac[t-1,s,a]*vaccrg }
        SU.vac[t-1,s,a] <- SU.vac[t-1,s,a] -vac.SUvac[t-1,s,a]

        New.vac[t-1,s,a] <-New.vac[t-1,s,a] +vac.SUvac[t-1,s,a]

# Vaccinating loss of immunity in recovered
#-----
        vac.SUrec[t-1,s,a] <- V.dmax[Rv,Vp] *(SU.rec[t-1,s,a]*vaccrg)/Totalvac
    if(vac.SUrec[t-1,s,a]>SU.rec[t-1,s,a]) { vac.SUrec[t-1,s,a] <-SU.rec[t-1,s,a]*vaccrg }
        SU.rec[t-1,s,a] <- SU.rec[t-1,s,a] -vac.SUrec[t-1,s,a]
        New.vac[t-1,s,a] <-New.vac[t-1,s,a] +vac.SUrec[t-1,s,a]

# Vaccinating all recovered
        vac.RE<-0
        for(w in 1:t) {
            vac.RE <-V.dmax[Rv,Vp] *(eRE[t-1,w,s,a]*vaccrg)/Totalvac
            if(vac.RE>eRE[t-1,w,s,a]) { vac.RE <-eRE[t-1,w,s,a]*vaccrg }
            eRE[t-1,w,s,a] <- eRE[t-1,w,s,a] -vac.RE
            eRE[t,1,s,a] <- eRE[t,1,s,a] +vac.RE *(1-rADth0[t.dr,s,a]) # Boost RE status after vaccination
            New.vac[t-1,s,a] <- New.vac[t-1,s,a] +vac.RE
        } # end w in 1:t

# Re-vaccinating previous vaccinated, if Rv>1
#-----
    if(Rv>1) {
    vcrg <- vaccrg
    if(Vp==6) { vcrg <- vac.crg1 }      # for age 16-19
        vac.VAef <-0
        for(w in 91:t) {
            vac.VAef <-V.dmax[Rv,Vp] *(eVAef2[t-1,w,s,a]*vcrg)/Totalvac
            if(vac.VAef>eVAef2[t-1,w,s,a]) { vac.VAef <-eVAef2[t-1,w,s,a]*vcrg }
            eVAef2[t-1,w,s,a] <- eVAef2[t-1,w,s,a] -vac.VAef
            eVAef2[t,1,s,a] <- eVAef2[t,1,s,a] +vac.VAef *(1-rADth0[t.dr,s,a])
            New.vac[t-1,s,a] <- New.vac[t-1,s,a] +vac.VAef
        } # end w in 91:t
    } # End if Rv>1

#-----
    }      # end a>a1-1
    }      # end a<a2+1

```

```

if( Vp==vac.AGP[Rv] ) {
  if(t==vacend[Rv,Vp]+1) { Vtru <-0 }
  }
  } # end if Vp<7
  } # end if Vtru==1

#=====
# Calculating no. of VA status at time t

eVA0[t,1,s,a] <- vac.SU[t-1,s,a] *(1-rADth0[t.dr,s,a])
VA0[t,s,a] <-eVA0[t,1,s,a]
for(v in 2:14) {
  eVA0[t,v,s,a] <-eVA0[t-1,v-1,s,a] *(1-rADth0[t.dr,s,a])
  VA0[t,s,a] <-VA0[t,s,a] +eVA0[t,v,s,a]
  } # end for v in 2:14

#-----
eVAef1[t,1,s,a] <-eVA0[t-1,14,s,a]*(1-rADth0[t.dr,s,a])
VAef1[t,s,a] <- eVAef1[t,1,s,a]
for(w in 2:63) {
  eVAef1[t,w,s,a] <-eVAef1[t-1,w-1,s,a]*(1-rADth0[t.dr,s,a])
  VAef1[t,s,a] <-VAef1[t,s,a] +eVAef1[t,w,s,a]
  }

#-----
# eVAef2 include renewed vaccination of previously vaccinated
#-----
eVAef2[t,1,s,a] <- eVAef2[t,1,s,a] +(eVAef1[t-1,63,s,a] +
  vac.SUvac[t-1,s,a] +vac.SUrec[t-1,s,a])*(1-rADth0[t.dr,s,a])
  tv1 <-(t-vac.tim[1]); if(tv1<3) { tv1<-3 }
for(w in 2:tv1) {
  eVAef2[t,w,s,a] <- eVAef2[t-1,w-1,s,a] *(1-gimmv.wan[w-1])*(1-rADth0[t.dr,s,a])
  }
for(w in 1:tv1) {
  VAef2[t,s,a] <-VAef2[t,s,a] +eVAef2[t,w,s,a]
  }

  } ### end if VAC==1

#=====
# Estimating return to susceptible in the recovered/vaccinated, minus newly infected due to loss of immunity
#-----

SUvac <-0
tv1 <-(t-vac.tim[1]); if(tv1<2) { tv1<-2 } # Loss of vaccine immunity
for(w in 1:tv1) {
  SUvac <- SUvac +eVAef2[t-1,w,s,a] *gimmv.wan[w]
  }
SU.vac[t,s,a] <-(SU.vac[t-1,s,a] +SUvac) *(1-rADth0[t.dr,s,a])

SUrec <-0
tw1 <-(t-ts); if(tw1<2) { tw1<-2 } # Loss of natural immunity
for(w in 1:tw1) {
  SUrec <- SUrec +eRE[t-1,w,s,a] *gimm.wan[w]
  }
SU.rec[t,s,a] <- (SU.rec[t-1,s,a] +SUrec) *(1-rADth0[t.dr,s,a])

#=====
# Estimating SU, EX, I, and RE
# New exposed and vaccinated already removed from SU[t-1, ...]
#-----
SU[t,s,a] <-(SU[t-1,s,a])*(1-rADth0[t.dr,s,a]) +
  dBth[a]*Bsex[s] -Seed.all[t,s,a]

New.expal[t-1,s,a] <- New.expsu[t-1,s,a] +New.expv0[t-1,s,a] +
  New.expv1[t-1,s,a] +New.expv2[t-1,s,a] +
  New.explosv1[t-1,s,a] +New.explosrec[t-1,s,a]

#=====
# All newsymptomatic cases at t. rVEsym: efficacy of vaccine on symptomatic cases

```

```

#-----
for(d in 2:dd) {
New.sym[t,s,a] <- New.sym[t,s,a] + (eI0[t-1,d-1,s,a] +
                                eI0v1[t-1,d-1,s,a]*(1-rVEsym1) +
                                eI0v2[t-1,d-1,s,a]*(1-rVEsym2) ) *alp2[d-1]*(1-rFm[a])
} # end for d in 2:dd

eEX[t,1,s,a] <-(New.expsu[t-1,s,a] +New.expv0[t-1,s,a]) +eSeed[t,1,s,a]

eEXv1[t,1,s,a] <-New.expv1[t-1,s,a]

eEXv2[t,1,s,a] <-(New.expv2[t-1,s,a] +New.explosv1[t-1,s,a] +New.explosrec[t-1,s,a])

# All covid deaths from symptomatic cases, ie, (1-rFm)
#-----
eInf[t,1,s,a] <- eEX[t,1,s,a] *(1-rFm[a]) *drisk.inf[s,a]*adjDth[t]
eInfv[t,1,s,a] <- (eEXv1[t,1,s,a] *(1-rVEsym1)*(1-rFm[a]) +
                  eEXv2[t,1,s,a] *(1-rVEsym2)*(1-rFm[a]) ) *drisk.inf[s,a]*adjDth[t]
#-----
I0.1 <-0; I0v1.1 <-0; I0v2.1 <-0

for(d in 2:dd) { # d in 2:dd=60
I0.1 <- I0.1 + eI0[t-1,d-1,s,a]*alp2[d-1]
I0v1.1 <-I0v1.1 +eI0v1[t-1,d-1,s,a]*alp2[d-1]
I0v2.1 <-I0v2.1 +eI0v2[t-1,d-1,s,a]*alp2[d-1]

eI0[t,1,s,a] <- eI0[t,1,s,a] + eEX[t-1,d-1,s,a]*alp1[d-1] # From Exp to I0
eI0v1[t,1,s,a] <-eI0v1[t,1,s,a] + eEXv1[t-1,d-1,s,a]*alp1[d-1] # Exposed in vaccinated dose-1
eI0v2[t,1,s,a] <-eI0v2[t,1,s,a] + eEXv2[t-1,d-1,s,a]*alp1[d-1] # Exposed in vaccinated dose-2

eQS[t,1,s,a] <- eQS[t,1,s,a] + eISq[t-1,d-1,s,a]*gam.s1[t-1,d-1]
eQSV[t,1,s,a] <-eQSV[t,1,s,a] +eISqv[t-1,d-1,s,a]*gam.s1[t-1,d-1]
eHS[t,1,s,a] <- eHS[t,1,s,a] + eISh[t-1,d-1,s,a]*gam.h1[t-1,d-1]
eHSv[t,1,s,a] <-eHSv[t,1,s,a] +eIShv[t-1,d-1,s,a]*gam.h1[t-1,d-1]

} # end d in 2:dd

#-----
# Allocate I0.all to IM, IS, etc
#-----
eIM0[t,1,s,a] <- I0.1 *rFm[a]
eIS0[t,1,s,a] <- I0.1 *(1-rFm[a]) *(1-rFhos[t-1,a])*(1-rFsq[t-1,a])
eISq[t,1,s,a] <- I0.1 *(1-rFm[a]) *(1-rFhos[t-1,a])* rFsq[t-1,a]
eISh[t,1,s,a] <- I0.1 *(1-rFm[a]) * rFhos[t-1,a]

eIM0v[t,1,s,a] <- I0v1.1*(1-(1-rVEsym1)*(1-rFm[a])) +I0v2.1*(1-(1-rVEsym2)*(1-rFm[a]))
eIS0v[t,1,s,a] <-(I0v1.1*(1-rVEsym1)+I0v2.1*(1-rVEsym2))*(1-rFm[a])*(1-rFhos[t-1,a])*(1-rFsq[t-1,a])
eISqv[t,1,s,a] <-(I0v1.1*(1-rVEsym1)+I0v2.1*(1-rVEsym2))*(1-rFm[a])*(1-rFhos[t-1,a])* rFsq[t-1,a]
eIShv[t,1,s,a] <-(I0v1.1*(1-rVEsym1)+I0v2.1*(1-rVEsym2))*(1-rFm[a])* rFhos[t-1,a]

#=====
# Estimate covid related deaths by days since exposed/infected
#-----
for(d in 2:dd+1) {
nDth.inf[t-1,s,a] <- nDth.inf[t-1,s,a]+ eInf[t-1,d-1,s,a]*gdth.inf[d-1]
nDth.infv[t-1,s,a] <-nDth.infv[t-1,s,a]+eInfv[t-1,d-1,s,a]*gdth.inf[d-1]
}

#=====
# UK data: 64% covid-19 deaths in hospital, 36% in other settings
if(HS[t-1,s,a]>0) { r.dhos<-nDth.inf[t-1,s,a] *0.64/HS[t-1,s,a] } else { r.dhos<-0 }
if(r.dhos>0.9) { r.dhos<-0.9 }

for(d in 1:dd) {
nDth.hos[t-1,d,s,a] <- eHS[t-1,d,s,a]*r.dhos
if(nDth.hos[t-1,d,s,a]<0) { nDth.hos[t-1,d,s,a]<-0 }
}

for(d in 1:dd) { # All hospital deaths
nDthHos.all[t-1,s,a] <-nDthHos.all[t-1,s,a] +nDth.hos[t-1,d,s,a]
}

```

```

    }

nDth.cov[t-1,s,a] <-nDth.cov[t-1,s,a] +nDthHos.all[t-1,s,a] # sum up covid deaths

# Deaths outside hospitals in ISO and QS:
nDth.ss[t-1,s,a] <- nDth.inf[t-1,s,a] -nDthHos.all[t-1,s,a]
  if(nDth.ss[t-1,s,a]<0) { nDth.ss[t-1,s,a]<-0 }

  nSOSq <- ISO[t-1,s,a] +QS[t-1,s,a]          # Temporary variable

if(nSOSq>0) { r.dss<-nDth.ss[t-1,s,a]/nSOSq } else { r.dss<-0 }
if(r.dss>1) { r.dss<-0.99 }

for(d in 1:dd) {
  nDth.s0[t-1,d,s,a] <-eISO[t-1,d,s,a] *r.dss
  if(nDth.s0[t-1,d,s,a]<0) { nDth.s0[t-1,d,s,a]<-0 }
  nDth.sq[t-1,d,s,a] <- eQS[t-1,d,s,a] *r.dss
  if(nDth.sq[t-1,d,s,a]<0) { nDth.sq[t-1,d,s,a]<-0 }
}

nDth.cov[t-1,s,a] <-nDth.cov[t-1,s,a] +nDth.s0[t-1,d,s,a] +nDth.sq[t-1,d,s,a]  ## sum up covid deaths
}

#-----
# Repeat the above for covid deaths in reinfected
#-----

if(HSV[t-1,s,a]>0) { r.dhosv<-nDth.infv[t-1,s,a] *0.64/HSV[t-1,s,a] } else { r.dhosv<-0 }
if(r.dhosv>0.9) { r.dhosv<-0.9 }

for(d in 1:dd) {
  nDth.hosv[t-1,d,s,a] <- eHSV[t-1,d,s,a]*r.dhosv
  if(nDth.hosv[t-1,d,s,a]<0) { nDth.hosv[t-1,d,s,a]<-0 }
}

for(d in 1:dd) {
  nDthHos.allv[t-1,s,a] <-nDthHos.allv[t-1,s,a] +nDth.hosv[t-1,d,s,a]
}

nDth.cov[t-1,s,a] <-nDth.cov[t-1,s,a] +nDthHos.allv[t-1,s,a]          # sum up covid deaths

# Deaths outside hospitals in ISO and QS:
nDth.ssv[t-1,s,a] <- nDth.infv[t-1,s,a] -nDthHos.allv[t-1,s,a]
  if(nDth.ssv[t-1,s,a]<0) { nDth.ssv[t-1,s,a]<-0 }

  nSOSqv <- ISOv[t-1,s,a] +QSV[t-1,s,a]          # Temporary variable

if(nSOSqv>0) { r.dssv<-nDth.ssv[t-1,s,a]/nSOSqv } else { r.dssv<-0 }
if(r.dssv>1) { r.dssv<-0.99 }

for(d in 1:dd) {
  nDth.s0v[t-1,d,s,a] <-eISOv[t-1,d,s,a] *r.dssv
  if(nDth.s0v[t-1,d,s,a]<0) { nDth.s0v[t-1,d,s,a]<-0 }
  nDth.sqv[t-1,d,s,a] <- eQSV[t-1,d,s,a] *r.dssv
  if(nDth.sqv[t-1,d,s,a]<0) { nDth.sqv[t-1,d,s,a]<-0 }
}

nDth.cov[t-1,s,a] <-nDth.cov[t-1,s,a] +nDth.s0v[t-1,d,s,a] +nDth.sqv[t-1,d,s,a]  ## sum up covid deaths
}

#-----

for(d in 2:dd) {
  eEX[t,d,s,a] <- eEX[t-1,d-1,s,a]*(1- $\alpha$ 1[d-1]) +eSeed[t,d,s,a]
  eEXv1[t,d,s,a] <-eEXv1[t-1,d-1,s,a]*(1- $\alpha$ 1[d-1])
  eEXv2[t,d,s,a] <-eEXv2[t-1,d-1,s,a]*(1- $\alpha$ 1[d-1])

  eI0[t,d,s,a] <- eI0[t-1,d-1,s,a]*(1- $\alpha$ 2[d-1])
  eI0v1[t,d,s,a] <-eI0v1[t-1,d-1,s,a]*(1- $\alpha$ 2[d-1])
}

```

```

eI0v2[t,d,s,a] <- eI0v2[t-1,d-1,s,a]*(1- $\alpha$ 2[d-1])

eIM0[t,d,s,a] <- eIM0[t-1,d-1,s,a]*(1-gam.m0[t-1,d-1])
eISq[t,d,s,a] <- eISq[t-1,d-1,s,a]*(1-gam.s1[t-1,d-1])
eISh[t,d,s,a] <- eISh[t-1,d-1,s,a]*(1-gam.h1[t-1,d-1])

eIS0[t,d,s,a] <- (eIS0[t-1,d-1,s,a]- nDth.s0[t-1,d-1,s,a])*(1-gam.s0[t-1,d-1])
eQS[t,d,s,a] <- (eQS[t-1,d-1,s,a]- nDth.sq[t-1,d-1,s,a])*(1-gam.s2[t-1,d-1])
eHS[t,d,s,a] <- (eHS[t-1,d-1,s,a]-nDth.hos[t-1,d-1,s,a])*(1-gam.h2[t-1,d-1])

eIM0v[t,d,s,a] <- eIM0v[t-1,d-1,s,a]*(1-gam.m0[t-1,d-1])
eISqv[t,d,s,a] <- eISqv[t-1,d-1,s,a]*(1-gam.s1[t-1,d-1])
eIShv[t,d,s,a] <- eIShv[t-1,d-1,s,a]*(1-gam.h1[t-1,d-1])

eIS0v[t,d,s,a] <- (eIS0v[t-1,d-1,s,a]- nDth.s0v[t-1,d-1,s,a])*(1-gam.s0[t-1,d-1])
eQSV[t,d,s,a] <- (eQSV[t-1,d-1,s,a]- nDth.sqv[t-1,d-1,s,a])*(1-gam.s2[t-1,d-1])
eHSv[t,d,s,a] <- (eHSv[t-1,d-1,s,a]-nDth.hosv[t-1,d-1,s,a])*(1-gam.h2[t-1,d-1])

eInf[t,d,s,a] <- eInf[t-1,d-1,s,a]*(1-gdth.inf[d-1])

eInfv[t,d,s,a] <- eInfv[t-1,d-1,s,a]*(1-gdth.inf[d-1])

      } # End d in 2:dd

=====
# Overall EX, I0, IM, IS, etc
=====
for(d in 1:dd) { # d in 1:dd

  EX[t,s,a] <- EX[t,s,a] + eEX[t,d,s,a]
  I0[t,s,a] <- I0[t,s,a] + eI0[t,d,s,a]
  IM0[t,s,a] <- IM0[t,s,a] +eIM0[t,d,s,a]
  IS0[t,s,a] <- IS0[t,s,a] +eIS0[t,d,s,a]
  ISq[t,s,a] <- ISq[t,s,a] +eISq[t,d,s,a]
  QS[t,s,a] <- QS[t,s,a] + eQS[t,d,s,a]
  ISh[t,s,a] <- ISh[t,s,a] +eISh[t,d,s,a]
  HS[t,s,a] <- HS[t,s,a] + eHS[t,d,s,a]

  EXv1[t,s,a] <- EXv1[t,s,a] +eEXv1[t,d,s,a]
  I0v1[t,s,a] <- I0v1[t,s,a] +eI0v1[t,d,s,a]

  EXv2[t,s,a] <- EXv2[t,s,a] +eEXv2[t,d,s,a]
  I0v2[t,s,a] <- I0v2[t,s,a] +eI0v2[t,d,s,a]

  IM0v[t,s,a] <- IM0v[t,s,a] +eIM0v[t,d,s,a]
  IS0v[t,s,a] <- IS0v[t,s,a] +eIS0v[t,d,s,a]
  ISqv[t,s,a] <- ISqv[t,s,a] +eISqv[t,d,s,a]
  QSV[t,s,a] <- QSV[t,s,a] + eQSV[t,d,s,a]
  IShv[t,s,a] <- IShv[t,s,a] +eIShv[t,d,s,a]
  Hsv[t,s,a] <- Hsv[t,s,a] + eHsv[t,d,s,a]

      } # end for d in 1:dd

  HS.new[t,s,a] <-eHS[t,1,s,a] +eHsv[t,1,s,a] # New hospital admission

=====
# Recovered from infected
#-----
for(d in 1:dd) {
  eRE[t,1,s,a] <-eRE[t,1,s,a] +
    (eQS[t-1,d,s,a]- nDth.sq[t-1,d,s,a])*gam.s2[t-1,d] +
    (eIS0[t-1,d,s,a]- nDth.s0[t-1,d,s,a])*gam.s0[t-1,d] +
    (eHS[t-1,d,s,a]- nDth.hos[t-1,d,s,a])*gam.h2[t-1,d] +
    eIM0[t-1,d,s,a] *gam.m0[t-1,d] +
    (eQSV[t-1,d,s,a]- nDth.sqv[t-1,d,s,a])*gam.s2[t-1,d] +
    (eIS0v[t-1,d,s,a]- nDth.s0v[t-1,d,s,a])*gam.s0[t-1,d] +
    (eHSv[t-1,d,s,a]- nDth.hosv[t-1,d,s,a])*gam.h2[t-1,d] +
    eIM0v[t-1,d,s,a] *gam.m0[t-1,d]

      } # end for d in 1:dd

```

```

RE[t,s,a] <-eRE[t,1,s,a]

      tw1 <-(t-ts); if(tw1<3) { tw1<-3 }
for(w in 2:tw1) {
  eRE[t,w,s,a] <- eRE[t-1,w-1,s,a]*(1-rADth0[t.dr,s,a]) *(1-gimm.wan[w-1])

  if(w==tw1) {
    eRE[t,w,s,a] <-(eRE[t,w-1,s,a]+eRE[t-1,w,s,a]) *(1-rADth0[t.dr,s,a]) *(1-gimm.wan[tw1])
  }

RE[t,s,a] <-RE[t,s,a] +eRE[t,w,s,a]

      } # end w in 2:tw1

#-----
N[t,s,a] <- SU[t,s,a] + SU.vac[t,s,a] + SU.rec[t,s,a] +
  EX[t,s,a] + EXv1[t,s,a] + EXv2[t,s,a] +
  IO[t,s,a] + IOv1[t,s,a] + IOv2[t,s,a] +
  IM0[t,s,a] + ISO[t,s,a] +
  ISq[t,s,a] + QS[t,s,a] +
  ISh[t,s,a] + HS[t,s,a] +
  IM0v[t,s,a] + ISOv[t,s,a] +
  ISqv[t,s,a] + QSV[t,s,a] +
  IShv[t,s,a] + Hsv[t,s,a] +
  VA0[t,s,a] + VAef1[t,s,a] + VAef2[t,s,a] +
  RE[t,s,a]

#-----
} #-----End for age in 1:18 #####
} #-----End for sex in 1:2 #####

} ##### end if t>ts #####

#=====
# Upgrading age at the beginning of a year (t1)
# jN[a], etc, are used to record N[a], etc, before their adjustments, because
# unchanged N[a] is required for the adjustment of N[a+1], etc.
#-----
if(t==tage) {
for(s in 1:2) {
for(a in 1:10) {
if(a>1) { Ag1<-1; Ag2<-1; Ag3<-10; Ag4<-10; a1<-(a-1) } # for age 10 to 79
if(a==1) { Ag1<-1; Ag2<-0; Ag3<-5; Ag4<-5; a1<-1 } # for age 0-4
if(a==2) { Ag1<-1; Ag2<-1; Ag3<-5; Ag4<-5; a1<-1 } # for age 5-9
if(a==3) { Ag1<-1; Ag2<-1; Ag3<-10; Ag4<-5; a1<-2 } # for age 10-19
if(a==10) { Ag1<-0; Ag2<-1; Ag3<-10; Ag4<-10; a1<-9 } # for age 80+
jN[a] <- N[t,s,a]
N[t,s,a] <- N[t,s,a] - Ag1* N[t,s,a]/(Ag3) + Ag2*jN[a1]/(Ag4)
jSU[a] <- SU[t,s,a]
SU[t,s,a] <- SU[t,s,a] - Ag1* SU[t,s,a]/(Ag3) + Ag2*jSU[a1]/(Ag4)
jRE[a] <- RE[t,s,a]
RE[t,s,a] <- RE[t,s,a] - Ag1* RE[t,s,a]/(Ag3) + Ag2*jRE[a1]/(Ag4)
jEX[a] <- EX[t,s,a]
EX[t,s,a] <- EX[t,s,a] - Ag1* EX[t,s,a]/(Ag3) + Ag2*jEX[a1]/(Ag4)
jIO[a] <- IO[t,s,a]
IO[t,s,a] <- IO[t,s,a] - Ag1* IO[t,s,a]/(Ag3) + Ag2*jIO[a1]/(Ag4)
jIM0[a] <- IM0[t,s,a]
IM0[t,s,a] <- IM0[t,s,a] - Ag1* IM0[t,s,a]/(Ag3) + Ag2*jIM0[a1]/(Ag4)
jISO[a] <- ISO[t,s,a]
ISO[t,s,a] <- ISO[t,s,a] - Ag1* ISO[t,s,a]/(Ag3) + Ag2*jISO[a1]/(Ag4)
jISq[a] <- ISq[t,s,a]
ISq[t,s,a] <- ISq[t,s,a] - Ag1* ISq[t,s,a]/(Ag3) + Ag2*jISq[a1]/(Ag4)
jISh[a] <- ISh[t,s,a]
ISh[t,s,a] <- ISh[t,s,a] - Ag1* ISh[t,s,a]/(Ag3) + Ag2*jISh[a1]/(Ag4)
jQS[a] <- QS[t,s,a]
QS[t,s,a] <- QS[t,s,a] - Ag1* QS[t,s,a]/(Ag3) + Ag2*jQS[a1]/(Ag4)
jHS[a] <- HS[t,s,a]
HS[t,s,a] <- HS[t,s,a] - Ag1* HS[t,s,a]/(Ag3) + Ag2*jHS[a1]/(Ag4)
}
}
}

```

```

jEXv1[a] <- EXv1[t,s,a]
EXv1[t,s,a] <- EXv1[t,s,a] - Ag1 * EXv1[t,s,a]/(Ag3) +Ag2* jEXv1[a1]/(Ag4)
jI0v1[a] <- I0v1[t,s,a]
I0v1[t,s,a] <- I0v1[t,s,a] - Ag1 * I0v1[t,s,a]/(Ag3) +Ag2* jI0v1[a1]/(Ag4)
jEXv2[a] <- EXv2[t,s,a]
EXv2[t,s,a] <- EXv2[t,s,a] - Ag1 * EXv2[t,s,a]/(Ag3) +Ag2* jEXv2[a1]/(Ag4)
jI0v2[a] <- I0v2[t,s,a]
I0v2[t,s,a] <- I0v2[t,s,a] - Ag1 * I0v2[t,s,a]/(Ag3) +Ag2* jI0v2[a1]/(Ag4)

jIM0v[a] <- IM0v[t,s,a]
IM0v[t,s,a] <- IM0v[t,s,a] -Ag1 * IM0v[t,s,a]/(Ag3) +Ag2*jIM0v[a1]/(Ag4)
jIS0v[a] <- IS0v[t,s,a]
IS0v[t,s,a] <- IS0v[t,s,a] -Ag1 * IS0v[t,s,a]/(Ag3) +Ag2*jIS0v[a1]/(Ag4)
jISqv[a] <- ISqv[t,s,a]
ISqv[t,s,a] <- ISqv[t,s,a] -Ag1 * ISqv[t,s,a]/(Ag3) +Ag2*jISqv[a1]/(Ag4)
jIShv[a] <- IShv[t,s,a]
IShv[t,s,a] <- IShv[t,s,a] -Ag1 * IShv[t,s,a]/(Ag3) +Ag2*jIShv[a1]/(Ag4)
jQSV[a] <- QSV[t,s,a]
QSV[t,s,a] <- QSV[t,s,a] -Ag1 * QSV[t,s,a]/(Ag3) +Ag2* jQSV[a1]/(Ag4)
jHSv[a] <- HSv[t,s,a]
HSv[t,s,a] <- HSv[t,s,a] -Ag1 * HSv[t,s,a]/(Ag3) +Ag2* jHSv[a1]/(Ag4)
jSU.vac[a] <- SU.vac[t,s,a]
SU.vac[t,s,a] <- SU.vac[t,s,a] -Ag1 * SU.vac[t,s,a]/(Ag3) +Ag2* jSU.vac[a1]/(Ag4)
jSU.rec[a] <- SU.rec[t,s,a]
SU.rec[t,s,a] <- SU.rec[t,s,a] -Ag1 * SU.rec[t,s,a]/(Ag3) +Ag2* jSU.rec[a1]/(Ag4)
jVA0[a] <- VA0[t,s,a]
VA0[t,s,a] <- VA0[t,s,a] -Ag1 * VA0[t,s,a]/(Ag3) +Ag2* jVA0[a1]/(Ag4)

jVAef1[a] <- VAef1[t,s,a]
VAef1[t,s,a] <- VAef1[t,s,a] -Ag1 * VAef1[t,s,a]/(Ag3) +Ag2*jVAef1[a1]/(Ag4)
jVAef2[a] <- VAef2[t,s,a]
VAef2[t,s,a] <- VAef2[t,s,a] -Ag1 * VAef2[t,s,a]/(Ag3) +Ag2*jVAef2[a1]/(Ag4)

for(d in 1:dd) {
  jeEX[d,a] <- eEX[t,d,s,a]
  eEX[t,d,s,a] <- eEX[t,d,s,a] -Ag1 * eEX[t,d,s,a]/(Ag3) +Ag2* jeEX[d,a1]/(Ag4)
  jeI0[d,a] <- eI0[t,d,s,a]
  eI0[t,d,s,a] <- eI0[t,d,s,a] -Ag1 * eI0[t,d,s,a]/(Ag3) +Ag2* jeI0[d,a1]/(Ag4)
  jeIM0[d,a] <- eIM0[t,d,s,a]
  eIM0[t,d,s,a] <- eIM0[t,d,s,a] -Ag1 * eIM0[t,d,s,a]/(Ag3) +Ag2* jeIM0[d,a1]/(Ag4)
  jeIS0[d,a] <- eIS0[t,d,s,a]
  eIS0[t,d,s,a] <- eIS0[t,d,s,a] -Ag1 * eIS0[t,d,s,a]/(Ag3) +Ag2* jeIS0[d,a1]/(Ag4)
  jeISqv[d,a] <- eISqv[t,d,s,a]
  eISqv[t,d,s,a] <- eISqv[t,d,s,a] -Ag1 * eISqv[t,d,s,a]/(Ag3) +Ag2* jeISqv[d,a1]/(Ag4)
  jeIShv[d,a] <- eIShv[t,d,s,a]
  eIShv[t,d,s,a] <- eIShv[t,d,s,a] -Ag1 * eIShv[t,d,s,a]/(Ag3) +Ag2* jeIShv[d,a1]/(Ag4)
  jeQS[d,a] <- eQS[t,d,s,a]
  eQS[t,d,s,a] <- eQS[t,d,s,a] -Ag1 * eQS[t,d,s,a]/(Ag3) +Ag2* jeQS[d,a1]/(Ag4)
  jeHS[d,a] <- eHS[t,d,s,a]
  eHS[t,d,s,a] <- eHS[t,d,s,a] -Ag1 * eHS[t,d,s,a]/(Ag3) +Ag2* jeHS[d,a1]/(Ag4)

  jeEXv1[d,a] <- eEXv1[t,d,s,a]
  eEXv1[t,d,s,a] <- eEXv1[t,d,s,a] -Ag1 * eEXv1[t,d,s,a]/(Ag3) +Ag2* jeEXv1[d,a1]/(Ag4)
  jeI0v1[d,a] <- eI0v1[t,d,s,a]
  eI0v1[t,d,s,a] <- eI0v1[t,d,s,a] -Ag1 * eI0v1[t,d,s,a]/(Ag3) +Ag2* jeI0v1[d,a1]/(Ag4)
  jeEXv2[d,a] <- eEXv2[t,d,s,a]
  eEXv2[t,d,s,a] <- eEXv2[t,d,s,a] -Ag1 * eEXv2[t,d,s,a]/(Ag3) +Ag2* jeEXv2[d,a1]/(Ag4)
  jeI0v2[d,a] <- eI0v2[t,d,s,a]
  eI0v2[t,d,s,a] <- eI0v2[t,d,s,a] -Ag1 * eI0v2[t,d,s,a]/(Ag3) +Ag2* jeI0v2[d,a1]/(Ag4)

  jeIM0v[d,a] <- eIM0v[t,d,s,a]
  eIM0v[t,d,s,a] <- eIM0v[t,d,s,a] -Ag1 * eIM0v[t,d,s,a]/(Ag3) +Ag2* jeIM0v[d,a1]/(Ag4)
  jeIS0v[d,a] <- eIS0v[t,d,s,a]
  eIS0v[t,d,s,a] <- eIS0v[t,d,s,a] -Ag1 * eIS0v[t,d,s,a]/(Ag3) +Ag2* jeIS0v[d,a1]/(Ag4)
  jeISqv[d,a] <- eISqv[t,d,s,a]
  eISqv[t,d,s,a] <- eISqv[t,d,s,a] -Ag1 * eISqv[t,d,s,a]/(Ag3) +Ag2* jeISqv[d,a1]/(Ag4)
  jeIShv[d,a] <- eIShv[t,d,s,a]
  eIShv[t,d,s,a] <- eIShv[t,d,s,a] -Ag1 * eIShv[t,d,s,a]/(Ag3) +Ag2* jeIShv[d,a1]/(Ag4)
  jeQSV[d,a] <- eQSV[t,d,s,a]
  eQSV[t,d,s,a] <- eQSV[t,d,s,a] -Ag1 * eQSV[t,d,s,a]/(Ag3) +Ag2* jeQSV[d,a1]/(Ag4)
}

```



```

jeHSv[d,a] <- eHSv[t,d,s,a]
eHSv[t,d,s,a] <- eHSv[t,d,s,a] -Ag1* eHSv[t,d,s,a]/(Ag3) +Ag2* jeHSv[d,a]/(Ag4)
jeInf[d,a] <- eInf[t,d,s,a]
eInf[t,d,s,a] <- eInf[t,d,s,a] -Ag1* eInf[t,d,s,a]/(Ag3) +Ag2* jeInf[d,a]/(Ag4)
jeInfv[d,a] <- eInfv[t,d,s,a]
eInfv[t,d,s,a] <- eInfv[t,d,s,a] -Ag1* eInfv[t,d,s,a]/(Ag3) +Ag2* jeInfv[d,a]/(Ag4)
} # end d in 1:dd

for(v in 1:dv0) {
jeVA0[v,a] <- eVA0[t,v,s,a]
eVA0[t,v,s,a] <- eVA0[t,v,s,a] -Ag1* eVA0[t,v,s,a]/(Ag3) +Ag2*jeVA0[v,a]/(Ag4)
} # end dt in 1:14

for(w in 1:tv0) {
jeVAef1[w,a] <- eVAef1[t,w,s,a]
eVAef1[t,w,s,a] <-eVAef1[t,w,s,a] -Ag1* eVAef1[t,w,s,a]/(Ag3) +Ag2* jeVAef1[w,a]/(Ag4)
}

tv1 <-(t-vac.tim[1]); if(tv1<1) { tv1<-2 }
for(w in 1:tv1) {
jeVAef2[w,a] <- eVAef2[t,w,s,a]
eVAef2[t,w,s,a] <-eVAef2[t,w,s,a] -Ag1* eVAef2[t,w,s,a]/(Ag3) +Ag2* jeVAef2[w,a]/(Ag4)
}

tw1 <-(t-ts); if(tw1<2) { tw1<-2 }
for(w in 1:tw1) {
jeRE[w,a] <- eRE[t,w,s,a]
eRE[t,w,s,a] <- eRE[t,w,s,a] -Ag1* eRE[t,w,s,a]/(Ag3) +Ag2* jeRE[w,a]/(Ag4)
}

} # end a
} # end s

tage <- tage+365 # t for next age shifting up

} # end if t==tage

=====
# Population estimates and all cause deaths
# add births and minus all cause deaths according to 5yr average death rates
=====

for(s in 1:2) {
for(a in 1:10) {

# Monitoring deaths in SU, RE and Effectively vaccinated (non-covid deaths)
nDth.oth[t-1,s,a] <-(SU[t-1,s,a] +RE[t-1,s,a] +SU.vac[t-1,s,a] +SU.rec[t-1,s,a] +
VA0[t-1,s,a] +VAef1[t-1,s,a] +VAef2[t-1,s,a]) *(rADth0[t.dr,s,a])

# All deaths:
nDth.all[t-1,s,a] <-nDth.oth[t-1,s,a] +nDth.cov[t-1,s,a]

=====
# Total numbers of S, E, I and R:
#-----

SU[t,3,11] <- SU[t,3,11] + SU[t,s,a]
EX[t,3,11] <- EX[t,3,11] + EX[t,s,a]
EXv1[t,3,11] <- EXv1[t,3,11] + EXv1[t,s,a]
EXv2[t,3,11] <- EXv2[t,3,11] + EXv2[t,s,a]
I0[t,3,11] <- I0[t,3,11] + I0[t,s,a]
I0v1[t,3,11] <- I0v1[t,3,11] + I0v1[t,s,a]
I0v2[t,3,11] <- I0v2[t,3,11] + I0v2[t,s,a]
IM0[t,3,11] <- IM0[t,3,11] + IM0[t,s,a]
IS0[t,3,11] <- IS0[t,3,11] + IS0[t,s,a]
ISq[t,3,11] <- ISq[t,3,11] + ISq[t,s,a]
ISh[t,3,11] <- ISh[t,3,11] + ISh[t,s,a]
QS[t,3,11] <- QS[t,3,11] + QS[t,s,a]
HS[t,3,11] <- HS[t,3,11] + HS[t,s,a]
IM0v[t,3,11] <- IM0v[t,3,11] + IM0v[t,s,a]

```

```

ISOv[t,3,11] <- ISOv[t,3,11] + ISOv[t,s,a]
ISqv[t,3,11] <- ISqv[t,3,11] + ISqv[t,s,a]
IShv[t,3,11] <- IShv[t,3,11] + IShv[t,s,a]
QSV[t,3,11] <- QSV[t,3,11] + QSV[t,s,a]
HSv[t,3,11] <- HSv[t,3,11] + HSv[t,s,a]

SU.vac[t,3,11] <- SU.vac[t,3,11] + SU.vac[t,s,a]
SU.rec[t,3,11] <- SU.rec[t,3,11] + SU.rec[t,s,a]

RE[t,3,11] <- RE[t,3,11] + RE[t,s,a]

N[t,3,11] <- N[t,3,11] + N[t,s,a]

HS.new[t,3,11] <-HS.new[t,3,11] + HS.new[t,s,a]

allHS[t] <- allHS[t] + HS[t,s,a] + HSv[t,s,a]

nDth.cov[t-1,3,11] <-round( nDth.cov[t-1,3,11] + nDth.cov[t-1,s,a] )

nDthHos.all[t-1,3,11] <- nDthHos.all[t-1,3,11] +
  nDthHos.all[t-1,s,a] +nDthHos.allv[t-1,s,a]

nDth.ss[t-1,3,11] <- nDth.ss[t-1,3,11] +
  nDth.ss[t-1,s,a] + nDth.ssv[t-1,s,a]

nDth.oth[t-1,3,11] <- nDth.oth[t-1,3,11] +nDth.oth[t-1,s,a]

nDth.all[t-1,3,11] <- nDth.all[t-1,3,11] +nDth.all[t-1,s,a]

#-----
# Assume the births = normal deaths to maintain the total N unchanged over time:
  dBth[1] <- nDth.all[t-1,3,11]

New.expal[t-1,3,11] <-New.expal[t-1,3,11] +New.expal[t-1,s,a]

New.expsu[t-1,3,11] <-New.expsu[t-1,3,11] +New.expsu[t-1,s,a]
New.expv0[t-1,3,11] <-New.expv0[t-1,3,11] +New.expv0[t-1,s,a]
New.expv1[t-1,3,11] <-New.expv1[t-1,3,11] +New.expv1[t-1,s,a]
New.expv2[t-1,3,11] <-New.expv2[t-1,3,11] +New.expv2[t-1,s,a]
New.explosrec[t-1,3,11] <-New.explosrec[t-1,3,11] +New.explosrec[t-1,s,a]

New.vac[t-1,3,11] <-New.vac[t-1,3,11] +New.vac[t-1,s,a]

New.sym[t,3,11] <-round( New.sym[t,3,11] +New.sym[t,s,a] )

  VA0[t,3,11] <- VA0[t,3,11] + VA0[t,s,a]
  VAef1[t,3,11] <- VAef1[t,3,11] + VAef1[t,s,a]
  VAef2[t,3,11] <- VAef2[t,3,11] + VAef2[t,s,a]

    } # end a
  } # end s

# Avoiding extremely small scientific notation for these variables

SU.vac[t,3,11] <- round(SU.vac[t,3,11], digits=0)
SU.rec[t,3,11] <- round(SU.rec[t,3,11], digits=0)
  VAef1[t,3,11] <- round( VAef1[t,3,11], digits=0)
  VAef2[t,3,11] <- round( VAef2[t,3,11], digits=0)

#####
## Cumulative number of deaths
##-----
  nDthcum.cov[t] <- nDthcum.cov[t-1] +nDth.cov[t-1,3,11]

# Sum of all infected at t:
  Infect.sum[t] <-EX[t,3,11] +EXv1[t,3,11] +EXv2[t,3,11] +
    I0[t,3,11] +I0v1[t,3,11] +I0v2[t,3,11] +
    IM0[t,3,11] +
    IS0[t,3,11] +
    ISq[t,3,11] + QS[t,3,11] +

```

```

        ISh[t,3,11] + HS[t,3,11] +
        IM0v[t,3,11] +
        IS0v[t,3,11] +
        ISqv[t,3,11] + QSv[t,3,11] +
        IShv[t,3,11] + HSV[t,3,11]

#####
# Obtaining N[t,3,11], and so on:
#####
    for(a in 1:10)    {
    for(s in 1:2)    {
        N[t,s,11] <- N[t,s,11] + N[t,s,a]
        N[t,3,a] <- N[t,3,a] + N[t,s,a]
    }
    }

    t.dr <- t.dr +1          # incremental by one day for daily death rate

}          # end for t in 2:tt

#####
# Output scenario specific results
#####

Result.mul <- data.frame(Rt[], N[,3,11], SU[,3,11], SU.rec[,3,11], SU.vac[,3,11], RE[,3,11], VAef1[,3,11],
    VAef2[,3,11], New.vac[,3,11], New.expal[,3,11], New.sym[,3,11], HS.new[,3,11], allHS[,
    Infect.sum[], nDth.cov[,3,11], nDthcum.cov[], nDth.all[,3,11])
OutFileName <- paste("...\\ResOut".out", sep="")
write.table(Result.mul, file=OutFileName, sep="t", quote=FALSE, append=TRUE, col.names=FALSE)

```

## 5.2 Input data files for running the R code

### 5.2-1 Age-sex-specific population, case-fatality rates, and hospitalisation rates “inParamet20.csv”

| agrp | age | n_m      | n_f      | cft_m    | cft_f    | hosp_r   |
|------|-----|----------|----------|----------|----------|----------|
| 1    | 0   | 1679.281 | 1596.919 | 3.22E-05 | 1.95E-05 | 0.000141 |
| 2    | 5   | 1815.031 | 1728.698 | 3.22E-05 | 1.95E-05 | 0.000141 |
| 3    | 10  | 3334.701 | 3166.337 | 0.000183 | 0.000111 | 0.000516 |
| 4    | 20  | 3722.353 | 3549.491 | 0.000742 | 0.00045  | 0.014247 |
| 5    | 30  | 3776.43  | 3800.291 | 0.001806 | 0.001094 | 0.051194 |
| 6    | 40  | 3541.015 | 3593.888 | 0.003649 | 0.002211 | 0.070833 |
| 7    | 50  | 3753.483 | 3861.581 | 0.01546  | 0.00937  | 0.16     |
| 8    | 60  | 2904.167 | 3053.137 | 0.049348 | 0.029908 | 0.318919 |
| 9    | 70  | 2258.713 | 2521.105 | 0.106488 | 0.064538 | 0.535484 |
| 10   | 80  | 1163.586 | 1690.569 | 0.16573  | 0.100442 | 0.593548 |

### 5.2-2 General and household contacts per person day “inCMATRIX10.csv”

| agegrp | a01     | a02     | a03     | a04     | a05     | a06     | a07     | a08     | a09     | a10    | h01     | h02     | h03     | h04    | h05     | h06     | h07     | h08     | h09     | h10    |
|--------|---------|---------|---------|---------|---------|---------|---------|---------|---------|--------|---------|---------|---------|--------|---------|---------|---------|---------|---------|--------|
| 1      | 1.7112  | 0.8034  | 0.6746  | 0.9657  | 1.644   | 0.6343  | 0.3257  | 0.1181  | 0.0446  | 0.0144 | 0.4788  | 0.5519  | 0.4667  | 0.4201 | 0.9003  | 0.188   | 0.06    | 0.0069  | 0.0005  | 0.001  |
| 2      | 0.6816  | 4.0343  | 0.9241  | 0.527   | 1.5545  | 0.9406  | 0.3     | 0.1504  | 0.053   | 0.027  | 0.2633  | 0.9183  | 0.6405  | 0.195  | 1.0256  | 0.3971  | 0.0324  | 0.0024  | 0.0003  | 0      |
| 3      | 0.24695 | 1.2525  | 7.7556  | 1.1873  | 1.3592  | 1.5294  | 0.5501  | 0.12925 | 0.05445 | 0.0531 | 0.13135 | 0.34485 | 1.43255 | 0.106  | 0.56165 | 0.624   | 0.0924  | 0.022   | 0.0019  | 0.0002 |
| 4      | 0.58115 | 0.35205 | 1.5978  | 3.92775 | 2.21165 | 1.94385 | 0.9814  | 0.1812  | 0.04545 | 0.0513 | 0.3288  | 0.1887  | 0.2676  | 0.8976 | 0.1759  | 0.25075 | 0.2221  | 0.0292  | 0.00135 | 0.0016 |
| 5      | 0.51325 | 0.91745 | 1.0955  | 1.8358  | 3.2517  | 2.0502  | 1.05485 | 0.27515 | 0.09215 | 0.0632 | 0.3491  | 0.5867  | 0.5529  | 0.0839 | 0.73455 | 0.0971  | 0.04185 | 0.019   | 0       | 0      |
| 6      | 0.1894  | 0.51185 | 1.8394  | 1.72385 | 2.3032  | 3.32855 | 1.1846  | 0.2469  | 0.09625 | 0.068  | 0.14665 | 0.3314  | 1.09355 | 0.2537 | 0.18465 | 0.5841  | 0.07945 | 0.02515 | 0.00905 | 0.0082 |
| 7      | 0.16105 | 0.16875 | 0.8093  | 1.867   | 1.7188  | 2.0792  | 1.86615 | 0.56305 | 0.18725 | 0.122  | 0.0701  | 0.05255 | 0.41045 | 0.3961 | 0.09315 | 0.10955 | 0.4917  | 0.05785 | 0.0032  | 0.0024 |
| 8      | 0.0431  | 0.23415 | 0.30125 | 0.7199  | 0.9967  | 0.9832  | 0.9769  | 0.9971  | 0.22895 | 0.1383 | 0.03365 | 0.03505 | 0.1736  | 0.1045 | 0.1491  | 0.17185 | 0.11215 | 0.5643  | 0.03465 | 0      |
| 9      | 0.0467  | 0.02455 | 0.4952  | 0.54    | 0.38355 | 0.9781  | 0.63465 | 0.8508  | 0.88915 | 1.0773 | 0.0103  | 0.0112  | 0.2227  | 0.0135 | 0.0207  | 0.25315 | 0.0555  | 0.1004  | 0.31395 | 0.3604 |
| 10     | 0.0206  | 0.0007  | 0.2481  | 0.1256  | 0.386   | 0.7299  | 0.4298  | 0.4669  | 1.0408  | 1.4766 | 0.0206  | 0       | 0.0362  | 0.0186 | 0.0414  | 0.1252  | 0.0766  | 0       | 0.3811  | 0.5412 |

### 5.2-3 Transmission related input parameters “inParamet20.csv”

| paramet | t_ts  | t_73  | t_77  | t_84  | t_187 | t_254 | t_310 | t_337 | t_371 | t_433 | t_506 | re_norm |
|---------|-------|-------|-------|-------|-------|-------|-------|-------|-------|-------|-------|---------|
| rFSQ1   | 0.1   | 0.1   | 0.4   | 0.8   | 0.9   | 0.9   | 0.9   | 0.9   | 0.9   | 0.9   | 0.9   | 0.9     |
| rFSQ2   | 0.1   | 0.2   | 0.6   | 0.8   | 0.95  | 0.95  | 0.95  | 0.95  | 0.95  | 0.95  | 0.95  | 0.95    |
| rFSQ3   | 0.1   | 0.4   | 0.8   | 0.9   | 0.95  | 0.95  | 0.95  | 0.95  | 0.95  | 0.95  | 0.95  | 0.95    |
| a1m     | 4     | 4     | 4     | 4     | 4     | 4     | 4     | 4     | 4     | 4     | 4     | 4       |
| a1s     | 2     | 2     | 2     | 2     | 2     | 2     | 2     | 2     | 2     | 2     | 2     | 2       |
| a2m     | 1.5   | 1.5   | 1.5   | 1.5   | 1.5   | 1.5   | 1.5   | 1.5   | 1.5   | 1.5   | 1.5   | 1.5     |
| a2s     | 1.061 | 1.061 | 1.061 | 1.061 | 1.061 | 1.061 | 1.061 | 1.061 | 1.061 | 1.061 | 1.061 | 1.061   |
| gm0m    | 5     | 5     | 5     | 5     | 5     | 5     | 5     | 5     | 5     | 5     | 5     | 5       |
| gm0s    | 2.236 | 2.236 | 2.236 | 2.236 | 2.236 | 2.236 | 2.236 | 2.236 | 2.236 | 2.236 | 2.236 | 2.236   |
| gs0m    | 5     | 5     | 5     | 5     | 5     | 5     | 5     | 5     | 5     | 5     | 5     | 5       |
| gs0s    | 2.236 | 2.236 | 2.236 | 2.236 | 2.236 | 2.236 | 2.236 | 2.236 | 2.236 | 2.236 | 2.236 | 2.236   |
| gs1m    | 4     | 3     | 3     | 2     | 2     | 2     | 2     | 2     | 2     | 2     | 2     | 2       |
| gs1s    | 2     | 1.732 | 1.732 | 1.414 | 1.414 | 1.414 | 1.414 | 1.414 | 1.414 | 1.414 | 1.414 | 1.414   |
| gs2m    | 2     | 3     | 3     | 4     | 4     | 4     | 4     | 4     | 4     | 4     | 4     | 4       |
| gs2s    | 1.414 | 1.732 | 1.732 | 2     | 2     | 2     | 2     | 2     | 2     | 2     | 2     | 2       |
| gh1m    | 4     | 3     | 3     | 2     | 2     | 2     | 2     | 2     | 2     | 2     | 2     | 2       |
| gh1s    | 2     | 1.732 | 1.732 | 1.414 | 1.414 | 1.414 | 1.414 | 1.414 | 1.414 | 1.414 | 1.414 | 1.414   |
| gh2m    | 10    | 10    | 10    | 10    | 10    | 10    | 10    | 10    | 10    | 10    | 10    | 10      |
| gn2s    | 3.162 | 3.162 | 3.162 | 3.162 | 3.162 | 3.162 | 3.162 | 3.162 | 3.162 | 3.162 | 3.162 | 3.162   |
| ac1a    | 1     | 0.9   | 0.8   | 0.4   | 0.6   | 0.8   | 0.6   | 0.7   | 0.4   | 0.7   | 0.9   | 1       |
| ac3a    | 1     | 0.8   | 0.7   | 0.3   | 0.55  | 0.6   | 0.3   | 0.6   | 0.3   | 0.6   | 0.8   | 1       |
| ac4a    | 1     | 0.7   | 0.6   | 0.2   | 0.4   | 0.5   | 0.2   | 0.5   | 0.2   | 0.5   | 0.7   | 1       |
| ac5a    | 1     | 0.6   | 0.5   | 0.15  | 0.2   | 0.3   | 0.15  | 0.3   | 0.15  | 0.3   | 0.6   | 1       |

## 5.2-4 Population age-sex-specific death risk by week “inDTH1519Eng10.csv”

| agrp | a01      | a02      | a03      | a04      | a05      | a06      | a07      | a08      | a09      | a10      |
|------|----------|----------|----------|----------|----------|----------|----------|----------|----------|----------|
| m01  | 0.002671 | 0.000229 | 0.000669 | 0.001443 | 0.002844 | 0.007457 | 0.01506  | 0.038052 | 0.097395 | 0.372278 |
| m02  | 0.002593 | 0.000153 | 0.000627 | 0.00166  | 0.002807 | 0.00697  | 0.014316 | 0.038425 | 0.098107 | 0.383425 |
| m03  | 0.002907 | 0.000229 | 0.00046  | 0.001479 | 0.002696 | 0.006708 | 0.01387  | 0.036699 | 0.094224 | 0.37748  |
| m04  | 0.002593 | 0.000229 | 0.000544 | 0.001479 | 0.002881 | 0.006445 | 0.014019 | 0.034694 | 0.093447 | 0.368439 |
| m05  | 0.002907 | 0.000229 | 0.000544 | 0.001407 | 0.00277  | 0.006745 | 0.014316 | 0.036233 | 0.091376 | 0.359646 |
| m06  | 0.002593 | 0.000229 | 0.00046  | 0.001299 | 0.002918 | 0.00652  | 0.013647 | 0.035487 | 0.091247 | 0.347509 |
| m07  | 0.002593 | 0.000229 | 0.000585 | 0.001515 | 0.002474 | 0.006033 | 0.013684 | 0.0353   | 0.090276 | 0.35333  |
| m08  | 0.002593 | 0.000153 | 0.000544 | 0.001696 | 0.002511 | 0.005808 | 0.013833 | 0.034694 | 0.088529 | 0.338221 |
| m09  | 0.002436 | 0.000229 | 0.000585 | 0.001515 | 0.002696 | 0.006558 | 0.013721 | 0.034648 | 0.088141 | 0.3324   |
| m10  | 0.00275  | 0.000153 | 0.000544 | 0.001227 | 0.00277  | 0.005996 | 0.013498 | 0.034974 | 0.086393 | 0.336487 |
| m11  | 0.002671 | 0.000153 | 0.000585 | 0.001443 | 0.002548 | 0.006258 | 0.013498 | 0.033622 | 0.085099 | 0.315062 |
| m12  | 0.002907 | 0.000153 | 0.00046  | 0.001407 | 0.002474 | 0.00652  | 0.013238 | 0.032689 | 0.082899 | 0.313328 |
| m13  | 0.002279 | 0.000153 | 0.000585 | 0.001588 | 0.002696 | 0.006183 | 0.012792 | 0.032736 | 0.083352 | 0.30404  |
| m14  | 0.002514 | 0.000153 | 0.000544 | 0.001299 | 0.002733 | 0.005696 | 0.012494 | 0.033015 | 0.082964 | 0.307879 |
| m15  | 0.002514 | 0.000229 | 0.000585 | 0.001588 | 0.002696 | 0.006183 | 0.013163 | 0.032736 | 0.081087 | 0.297724 |
| m16  | 0.002671 | 0.000229 | 0.000502 | 0.001299 | 0.002622 | 0.005808 | 0.01294  | 0.032176 | 0.080116 | 0.294132 |
| m17  | 0.002436 | 0.000153 | 0.000544 | 0.001588 | 0.002548 | 0.005546 | 0.012754 | 0.032036 | 0.078887 | 0.285463 |
| m18  | 0.002593 | 0.000153 | 0.000585 | 0.001407 | 0.002881 | 0.005771 | 0.012717 | 0.031943 | 0.07811  | 0.285339 |
| m19  | 0.002436 | 0.000153 | 0.000502 | 0.001515 | 0.002659 | 0.005883 | 0.012308 | 0.031523 | 0.078692 | 0.283977 |
| m20  | 0.002514 | 0.000153 | 0.000418 | 0.001335 | 0.002585 | 0.005808 | 0.012606 | 0.031104 | 0.076686 | 0.276794 |
| m21  | 0.002671 | 7.64E-05 | 0.000502 | 0.001479 | 0.002659 | 0.005733 | 0.012643 | 0.03129  | 0.075198 | 0.276051 |
| m22  | 0.0022   | 0.000306 | 0.000627 | 0.001696 | 0.002474 | 0.005321 | 0.012271 | 0.030451 | 0.074162 | 0.265029 |
| m23  | 0.002514 | 0.000306 | 0.000418 | 0.001515 | 0.002511 | 0.005471 | 0.012159 | 0.030264 | 0.076686 | 0.264286 |
| m24  | 0.002593 | 0.000306 | 0.000544 | 0.001299 | 0.002659 | 0.005996 | 0.012234 | 0.029705 | 0.074551 | 0.262552 |
| m25  | 0.002279 | 0.000153 | 0.000544 | 0.001371 | 0.002437 | 0.005621 | 0.012457 | 0.030217 | 0.076104 | 0.266886 |
| m26  | 0.002514 | 0.000229 | 0.000502 | 0.001263 | 0.002585 | 0.005471 | 0.011862 | 0.030264 | 0.07468  | 0.25896  |
| m27  | 0.002279 | 0.000153 | 0.000418 | 0.001551 | 0.002696 | 0.005359 | 0.012568 | 0.030684 | 0.075716 | 0.266639 |
| m28  | 0.002357 | 0.000153 | 0.000544 | 0.001479 | 0.002327 | 0.005584 | 0.011899 | 0.029891 | 0.072415 | 0.255988 |
| m29  | 0.002671 | 0.000229 | 0.000418 | 0.001371 | 0.002511 | 0.005659 | 0.012978 | 0.029984 | 0.073127 | 0.262799 |
| m30  | 0.002436 | 0.000229 | 0.000418 | 0.001263 | 0.002548 | 0.005771 | 0.01149  | 0.029098 | 0.07578  | 0.262056 |
| m31  | 0.002279 | 0.000153 | 0.000544 | 0.001551 | 0.002511 | 0.005584 | 0.011936 | 0.028958 | 0.071703 | 0.25252  |
| m32  | 0.002436 | 0.000306 | 0.000544 | 0.001371 | 0.002659 | 0.005846 | 0.012085 | 0.030404 | 0.073062 | 0.262304 |
| m33  | 0.00275  | 0.000229 | 0.000502 | 0.001299 | 0.002548 | 0.005621 | 0.011862 | 0.029425 | 0.074227 | 0.261313 |
| m34  | 0.002121 | 7.64E-05 | 0.000376 | 0.001299 | 0.002511 | 0.004797 | 0.012011 | 0.029378 | 0.073127 | 0.260322 |
| m35  | 0.002907 | 0.000153 | 0.000502 | 0.001588 | 0.002401 | 0.005021 | 0.012383 | 0.030404 | 0.071833 | 0.257226 |
| m36  | 0.001964 | 0.000153 | 0.000585 | 0.001371 | 0.002179 | 0.005434 | 0.011564 | 0.028539 | 0.07481  | 0.256359 |
| m37  | 0.002279 | 0.000153 | 0.000376 | 0.001335 | 0.002401 | 0.005171 | 0.011713 | 0.030031 | 0.07591  | 0.268992 |
| m38  | 0.002043 | 0.000229 | 0.000335 | 0.001335 | 0.002548 | 0.005359 | 0.012494 | 0.029425 | 0.073515 | 0.270354 |
| m39  | 0.002671 | 0.000153 | 0.000418 | 0.001191 | 0.002511 | 0.005246 | 0.011974 | 0.029891 | 0.076427 | 0.276546 |
| m40  | 0.002436 | 0.000229 | 0.000585 | 0.001515 | 0.002437 | 0.005471 | 0.012234 | 0.030031 | 0.079534 | 0.278528 |
| m41  | 0.002436 | 0.000153 | 0.000585 | 0.001371 | 0.002437 | 0.005509 | 0.012606 | 0.030357 | 0.079598 | 0.288435 |
| m42  | 0.002514 | 0.000153 | 0.000585 | 0.001407 | 0.00229  | 0.005621 | 0.011788 | 0.03087  | 0.078239 | 0.294008 |
| m43  | 0.002671 | 0.000229 | 0.000502 | 0.001299 | 0.00229  | 0.005359 | 0.012457 | 0.030964 | 0.078175 | 0.290417 |
| m44  | 0.002514 | 0.000229 | 0.000585 | 0.001227 | 0.002364 | 0.005509 | 0.012271 | 0.031803 | 0.081475 | 0.296609 |
| m45  | 0.002357 | 0.000229 | 0.000502 | 0.001118 | 0.002364 | 0.005284 | 0.012234 | 0.032502 | 0.081669 | 0.303421 |
| m46  | 0.002514 | 0.000229 | 0.00046  | 0.001443 | 0.002401 | 0.005584 | 0.012643 | 0.031383 | 0.082058 | 0.305402 |
| m47  | 0.00275  | 0.000153 | 0.000627 | 0.001227 | 0.002364 | 0.005621 | 0.012606 | 0.03171  | 0.082511 | 0.306145 |
| m48  | 0.002671 | 7.64E-05 | 0.00046  | 0.001443 | 0.002327 | 0.005434 | 0.013387 | 0.031756 | 0.080699 | 0.313824 |
| m49  | 0.002357 | 0.000306 | 0.000502 | 0.001335 | 0.002548 | 0.005434 | 0.013238 | 0.032782 | 0.085293 | 0.322369 |
| m50  | 0.002121 | 0.000306 | 0.000585 | 0.001371 | 0.002511 | 0.005471 | 0.013163 | 0.033388 | 0.086005 | 0.327199 |
| m51  | 0.002671 | 0.000306 | 0.000418 | 0.001299 | 0.002511 | 0.005584 | 0.013387 | 0.034135 | 0.088723 | 0.336859 |
| m52  | 0.002593 | 0.000382 | 0.00046  | 0.001299 | 0.002474 | 0.006108 | 0.013535 | 0.034508 | 0.089694 | 0.347509 |

|     |          |          |          |          |          |          |          |          |          |          |
|-----|----------|----------|----------|----------|----------|----------|----------|----------|----------|----------|
| f01 | 0.002314 | 0.00024  | 0.000308 | 0.000713 | 0.001725 | 0.004231 | 0.010467 | 0.026299 | 0.068384 | 0.358013 |
| f02 | 0.002562 | 0.000401 | 0.000308 | 0.000638 | 0.001652 | 0.003936 | 0.009381 | 0.025145 | 0.069481 | 0.368451 |
| f03 | 0.001901 | 0.00024  | 0.000352 | 0.000713 | 0.001725 | 0.0039   | 0.009344 | 0.024303 | 0.06821  | 0.364013 |
| f04 | 0.002396 | 0.00016  | 0.00022  | 0.000676 | 0.001432 | 0.003863 | 0.00891  | 0.023771 | 0.063301 | 0.347739 |
| f05 | 0.002149 | 0.00024  | 0.000352 | 0.000638 | 0.001578 | 0.003863 | 0.009417 | 0.023904 | 0.063994 | 0.342151 |
| f06 | 0.002644 | 0.00016  | 0.000352 | 0.000751 | 0.001578 | 0.003863 | 0.00891  | 0.023061 | 0.062897 | 0.322343 |
| f07 | 0.002066 | 0.00016  | 0.000308 | 0.000826 | 0.001468 | 0.004047 | 0.009018 | 0.02346  | 0.062261 | 0.320864 |
| f08 | 0.001983 | 0.00016  | 0.000352 | 0.000788 | 0.001578 | 0.00401  | 0.009018 | 0.022706 | 0.061626 | 0.315768 |
| f09 | 0.002231 | 0.00016  | 0.000308 | 0.000788 | 0.001615 | 0.00401  | 0.008801 | 0.023194 | 0.061453 | 0.311412 |
| f10 | 0.002066 | 0.00024  | 0.000396 | 0.000638 | 0.001432 | 0.00401  | 0.009091 | 0.022041 | 0.060818 | 0.308618 |
| f11 | 0.001901 | 8.02E-05 | 0.000308 | 0.000713 | 0.001542 | 0.003789 | 0.008729 | 0.022041 | 0.06024  | 0.301221 |
| f12 | 0.002149 | 0.00016  | 0.000352 | 0.000826 | 0.001395 | 0.003716 | 0.008366 | 0.02142  | 0.058681 | 0.286345 |
| f13 | 0.001983 | 0.00024  | 0.000264 | 0.000751 | 0.001615 | 0.003458 | 0.008692 | 0.022085 | 0.057872 | 0.280427 |
| f14 | 0.001901 | 0.00016  | 0.000308 | 0.000638 | 0.001468 | 0.003789 | 0.00862  | 0.021287 | 0.056024 | 0.275907 |
| f15 | 0.001983 | 0.00024  | 0.000352 | 0.000713 | 0.001468 | 0.003826 | 0.008475 | 0.021198 | 0.056428 | 0.273194 |
| f16 | 0.002066 | 0.00016  | 0.000352 | 0.000676 | 0.001505 | 0.003605 | 0.008765 | 0.02111  | 0.055331 | 0.267195 |
| f17 | 0.002066 | 0.00016  | 0.000308 | 0.000676 | 0.001468 | 0.003789 | 0.00804  | 0.02142  | 0.053771 | 0.257414 |
| f18 | 0.001735 | 0.00024  | 0.000264 | 0.000638 | 0.001395 | 0.003532 | 0.008149 | 0.020888 | 0.053078 | 0.253798 |
| f19 | 0.002066 | 0.00016  | 0.000308 | 0.000601 | 0.001395 | 0.003752 | 0.008547 | 0.020445 | 0.052963 | 0.254291 |
| f20 | 0.001983 | 0.00016  | 0.000352 | 0.000751 | 0.001578 | 0.003679 | 0.007968 | 0.020445 | 0.051865 | 0.248209 |
| f21 | 0.001901 | 0.00016  | 0.000264 | 0.000751 | 0.001505 | 0.003642 | 0.00804  | 0.020134 | 0.051923 | 0.246976 |
| f22 | 0.002149 | 0.00016  | 0.000264 | 0.000676 | 0.001468 | 0.003421 | 0.007932 | 0.019602 | 0.051403 | 0.237689 |
| f23 | 0.001901 | 8.02E-05 | 0.000308 | 0.000488 | 0.001468 | 0.003421 | 0.007968 | 0.020622 | 0.051634 | 0.234319 |
| f24 | 0.002314 | 0.00016  | 0.000396 | 0.000563 | 0.001358 | 0.003495 | 0.008258 | 0.019292 | 0.050883 | 0.237032 |
| f25 | 0.001983 | 0.00016  | 0.000176 | 0.000676 | 0.001505 | 0.003679 | 0.007714 | 0.019602 | 0.050826 | 0.238429 |
| f26 | 0.001653 | 8.02E-05 | 0.000396 | 0.000676 | 0.001468 | 0.003752 | 0.008185 | 0.019691 | 0.049266 | 0.231114 |
| f27 | 0.002066 | 0.00024  | 0.00044  | 0.000638 | 0.001395 | 0.003458 | 0.008511 | 0.019025 | 0.051865 | 0.237114 |
| f28 | 0.002149 | 0.00016  | 0.000352 | 0.000563 | 0.001432 | 0.003605 | 0.007896 | 0.018493 | 0.049959 | 0.225854 |
| f29 | 0.001735 | 8.02E-05 | 0.000264 | 0.000638 | 0.001432 | 0.003458 | 0.007859 | 0.019114 | 0.050017 | 0.235059 |
| f30 | 0.002066 | 0.00024  | 0.000308 | 0.000525 | 0.001725 | 0.003495 | 0.007751 | 0.019513 | 0.050537 | 0.235059 |
| f31 | 0.002231 | 0.00016  | 0.000264 | 0.000638 | 0.001505 | 0.003532 | 0.008004 | 0.018538 | 0.048689 | 0.223553 |
| f32 | 0.002149 | 8.02E-05 | 0.000352 | 0.000525 | 0.001432 | 0.003348 | 0.008113 | 0.019513 | 0.049035 | 0.23136  |
| f33 | 0.002066 | 8.02E-05 | 0.000308 | 0.000563 | 0.001395 | 0.003458 | 0.007896 | 0.018892 | 0.050306 | 0.230867 |
| f34 | 0.001735 | 0.00016  | 0.000352 | 0.000713 | 0.001358 | 0.003201 | 0.007533 | 0.020045 | 0.049959 | 0.231278 |
| f35 | 0.002231 | 8.02E-05 | 0.00022  | 0.000751 | 0.001395 | 0.003532 | 0.007896 | 0.018937 | 0.050364 | 0.226758 |
| f36 | 0.001818 | 0.00024  | 0.000264 | 0.000563 | 0.001285 | 0.003421 | 0.007751 | 0.018759 | 0.050537 | 0.22947  |
| f37 | 0.002066 | 0.00016  | 0.000308 | 0.000638 | 0.001358 | 0.003348 | 0.008222 | 0.019779 | 0.050999 | 0.229635 |
| f38 | 0.001901 | 0.00024  | 0.00022  | 0.000601 | 0.001285 | 0.003348 | 0.008294 | 0.019646 | 0.051519 | 0.236621 |
| f39 | 0.002314 | 0.00016  | 0.000264 | 0.000601 | 0.001468 | 0.003458 | 0.008403 | 0.019558 | 0.053194 | 0.245004 |
| f40 | 0.002231 | 0.00024  | 0.000352 | 0.000525 | 0.001321 | 0.003642 | 0.007896 | 0.020001 | 0.052327 | 0.245743 |
| f41 | 0.002396 | 8.02E-05 | 0.000352 | 0.000601 | 0.001248 | 0.003495 | 0.008222 | 0.019957 | 0.053713 | 0.259222 |
| f42 | 0.001901 | 0.00024  | 0.000264 | 0.000638 | 0.001395 | 0.003421 | 0.008004 | 0.02009  | 0.054176 | 0.259962 |
| f43 | 0.002231 | 0.00024  | 0.00022  | 0.000563 | 0.001358 | 0.003458 | 0.00833  | 0.020533 | 0.05406  | 0.25725  |
| f44 | 0.002231 | 0.00016  | 0.00022  | 0.000488 | 0.001615 | 0.003458 | 0.008801 | 0.020533 | 0.054233 | 0.267852 |
| f45 | 0.002231 | 0.00024  | 0.000396 | 0.000488 | 0.001432 | 0.003532 | 0.008801 | 0.020489 | 0.055619 | 0.270236 |
| f46 | 0.002149 | 0.000321 | 0.000396 | 0.000525 | 0.001395 | 0.003495 | 0.008801 | 0.020711 | 0.0551   | 0.270153 |
| f47 | 0.001818 | 0.00016  | 0.000308 | 0.000563 | 0.001468 | 0.003789 | 0.008366 | 0.021553 | 0.057525 | 0.269332 |
| f48 | 0.002066 | 0.00024  | 0.00022  | 0.000638 | 0.001505 | 0.0039   | 0.008403 | 0.021198 | 0.057352 | 0.279359 |
| f49 | 0.001983 | 0.00016  | 0.000264 | 0.000563 | 0.001432 | 0.003789 | 0.00891  | 0.021598 | 0.061511 | 0.290536 |
| f50 | 0.001901 | 0.00024  | 0.000352 | 0.000563 | 0.001468 | 0.004047 | 0.008366 | 0.022751 | 0.061164 | 0.298262 |
| f51 | 0.002314 | 0.00024  | 0.000352 | 0.000563 | 0.001505 | 0.003495 | 0.009091 | 0.023416 | 0.062435 | 0.311823 |
| f52 | 0.001901 | 0.00016  | 0.000352 | 0.000638 | 0.001615 | 0.003789 | 0.009055 | 0.023061 | 0.064687 | 0.316097 |

## 6. References for supplementary material

1. Lavine JS, Bjornstad ON, Antia R. Immunological characteristics govern the transition of COVID-19 to endemicity. *Science (New York, NY)* 2021;371(6530):741-45. doi: 10.1126/science.abe6522 [published Online First: 2021/01/14]
2. Olliaro P. What does 95% COVID-19 vaccine efficacy really mean? *Lancet Infect Dis* 2021 doi: 10.1016/s1473-3099(21)00075-x [published Online First: 2021/02/21]
3. Rock K, Brand S, Moir J, et al. Dynamics of infectious diseases. *Rep Prog Phys* 2014;77(2):026602. doi: 10.1088/0034-4885/77/2/026602 [published Online First: 2014/01/22]
4. Tuckwell HC, Williams RJ. Some properties of a simple stochastic epidemic model of SIR type. *Math Biosci* 2007;208(1):76-97. doi: 10.1016/j.mbs.2006.09.018 [published Online First: 2006/12/19]
5. Grant A. Dynamics of COVID-19 epidemics: SEIR models underestimate peak infection rates and overestimate epidemic duration. *medRxiv preprint doi: <https://doi.org/10.1101/2020040220050674>* 2020
6. Krylova O, Earn DJD. Effects of the infectious period distribution on predicted transitions in childhood disease dynamics. *J R Soc Interface* 2013;10(84):20130098-98. doi: 10.1098/rsif.2013.0098
7. Davies NG, Kucharski AJ, Eggo RM, et al. Effects of non-pharmaceutical interventions on COVID-19 cases, deaths, and demand for hospital services in the UK: a modelling study. *The Lancet Public health* 2020;5(7):e375-e85. doi: 10.1016/s2468-2667(20)30133-x [published Online First: 2020/06/06]
8. GOV.UK. Coronavirus (COVID-19) in the UK 2021 [Available from: <https://coronavirus.data.gov.uk/> accessed 31 July 2021.
9. Davies NG, Klepac P, Liu Y, et al. Age-dependent effects in the transmission and control of COVID-19 epidemics. *Nature medicine* 2020;26(8):1205-11. doi: 10.1038/s41591-020-0962-9 [published Online First: 2020/06/18]
10. Zhang J, Litvinova M, Wang W, et al. Evolving epidemiology and transmission dynamics of coronavirus disease 2019 outside Hubei province, China: a descriptive and modelling study. *Lancet Infect Dis* 2020 doi: 10.1016/s1473-3099(20)30230-9 [published Online First: 2020/04/06]
11. Ferguson N, Laydon D, Nedjati-Gilani G, et al. Impact of non-pharmaceutical interventions (NPIs) to reduce COVID-19 mortality and healthcare demand.: Imperial College COVID-19 Response Team., 2020.
12. Verity R, Okell LC, Dorigatti I, et al. Estimates of the severity of coronavirus disease 2019: a model-based analysis. *Lancet Infect Dis* 2020 doi: 10.1016/s1473-3099(20)30243-7 [published Online First: 2020/04/03]
13. Chinese Center of Disease Prevention and Control. [The epidemiological characteristics of an outbreak of 2019 novel coronavirus diseases (COVID-19) in China]. *Zhonghua Liu Xing Bing Xue Za Zhi* 2020;41(2):145-51. doi: 10.3760/cma.j.issn.0254-6450.2020.02.003 [published Online First: 2020/02/18]
14. Government Office for Science and Scientific Advisory Group for Emergencies. Guidance: The R number and growth rate in the UK. From Government Office for Science and Scientific Advisory Group for Emergencies. 2020 [updated Last updated 2 October 2020. Available from: <https://www.gov.uk/guidance/the-r-number-in-the-uk#contents> accessed 08/10/2020.

15. Gov.uk. Coronavirus (COVID-19): Guidance and support. 2021 [Available from: <https://www.gov.uk/coronavirus> accessed 30 July 2021.
16. Rubin D, Huang J, Fisher BT, et al. Association of Social Distancing, Population Density, and Temperature With the Instantaneous Reproduction Number of SARS-CoV-2 in Counties Across the United States. *JAMA network open* 2020;3(7):e2016099. doi: 10.1001/jamanetworkopen.2020.16099 [published Online First: 2020/07/24]
17. Li F, Li YY, Liu MJ, et al. Household transmission of SARS-CoV-2 and risk factors for susceptibility and infectivity in Wuhan: a retrospective observational study. *Lancet Infect Dis* 2021;21(5):617-28. doi: 10.1016/s1473-3099(20)30981-6 [published Online First: 2021/01/22]
18. Mossong J, Hens N, Jit M, et al. Social contacts and mixing patterns relevant to the spread of infectious diseases. *PLoS Med* 2008;5(3):e74. doi: 10.1371/journal.pmed.0050074 [published Online First: 2008/03/28]
19. PHE. COVID-19 vaccine surveillance report Week 30 Public Health England 2021.
20. Le Bert N, Tan AT, Kunasegaran K, et al. SARS-CoV-2-specific T cell immunity in cases of COVID-19 and SARS, and uninfected controls. *Nature* 2020;584(7821):457-62. doi: 10.1038/s41586-020-2550-z [published Online First: 2020/07/16]
21. Widge AT, Roupheal NG, Jackson LA, et al. Durability of Responses after SARS-CoV-2 mRNA-1273 Vaccination. *The New England journal of medicine* 2021;384(1):80-82. doi: 10.1056/NEJMc2032195 [published Online First: 2020/12/04]
22. Mallapaty S. COVID vaccines slash viral spread - but Delta is an unknown. *Nature* 2021 doi: 10.1038/d41586-021-02054-z [published Online First: 2021/07/30]
23. Gov.uk. Slides and datasets to accompany coronavirus press conference: 5 June 2020. Published 5 June 2020 ed, 2020.
24. Prem K, Cook AR, Jit M. Projecting social contact matrices in 152 countries using contact surveys and demographic data. *PLoS Comput Biol* 2017;13(9):e1005697. doi: 10.1371/journal.pcbi.1005697 [published Online First: 2017/09/13]
25. Office for National Statistics. Dataset: 2018-based National population projections table of contents, 2018.
26. Mahase E. Covid-19: What have we learnt about the new variant in the UK? *Bmj* 2020;371:m4944. doi: 10.1136/bmj.m4944 [published Online First: 2020/12/29]
27. Giordano G, Blanchini F, Bruno R, et al. Modelling the COVID-19 epidemic and implementation of population-wide interventions in Italy. *Nature medicine* 2020;26(6):855-60. doi: 10.1038/s41591-020-0883-7 [published Online First: 2020/04/24]
28. Gov.uk. Official Statistics. UK Biobank COVID-19 antibody study: round 1 results. : Department of Health & Social Care [Available from: <https://www.gov.uk/government/publications/uk-biobank-covid-19-seroprevalence-study-round-1-results/uk-biobank-covid-19-seroprevalence-study-round-1-results> accessed Published 30 July 2020. .
29. Bingham K. The UK Government's Vaccine Taskforce: strategy for protecting the UK and the world. *Lancet* 2020 doi: 10.1016/s0140-6736(20)32175-9 [published Online First: 2020/10/31]
30. Department of Health & Social Care JCVI statement, August 2021: COVID-19 vaccination of children and young people aged 12 to 17 years.: Department of Health & Social Care 2021 [Available from: <https://www.gov.uk/government/organisations/department-of-health-and-social-care>.
31. Mahase E. Covid-19: UK approves Pfizer and BioNTech vaccine with rollout due to start next week. 2020;371:m4714. doi: 10.1136/bmj.m4714 %J BMJ



32. PHE. COVID-19 vaccine surveillance report Week 28: Public Health England 2021.
33. Hall ea. Effectiveness of BNT162b2 mRNA Vaccine Against Infection and COVID-19 Vaccine Coverage in Healthcare Workers in England, Multicentre Prospective Cohort Study (the SIREN Study). *Lancet (preprint)* 2021
34. Ramsay M. COVID-19: analysing first vaccine effectiveness in the UK 2021 [updated 23 February 2021. Available from: <https://publichealthmatters.blog.gov.uk/2021/02/23/covid-19-analysing-first-vaccine-effectiveness-in-the-uk/>.
35. Department of Health and Social Care. Optimising the covid-19 vaccination programme for maximum short-term impact. 2021 [Available from: <https://www.gov.uk/government/publications/prioritising-the-first-covid-19-vaccine-dose-icvi-statement/optimising-the-covid-19-vaccination-programme-for-maximum-short-term-impact>.
36. Levine-Tiefenbrun M, Yelin I, Katz R, et al. Decreased SARS-CoV-2 viral load following vaccination. 2021:2021.02.06.21251283. doi: 10.1101/2021.02.06.21251283 %J medRxiv
37. Emary KRW, Golubchik T, Aley PK, et al. Efficacy of ChAdOx1 nCoV-19 (AZD1222) Vaccine Against SARS-CoV-2 VOC 202012/01 (B.1.1.7). SSRN [Preprint]. 2021. DOI: 10.2139/ssrn.3779160. Available at: [https://papers.ssrn.com/sol3/papers.cfm?abstract\\_id=3779160](https://papers.ssrn.com/sol3/papers.cfm?abstract_id=3779160) 2021
38. Liu QH, Ajelli M, Aleta A, et al. Measurability of the epidemic reproduction number in data-driven contact networks. *Proceedings of the National Academy of Sciences of the United States of America* 2018;115(50):12680-85. doi: 10.1073/pnas.1811115115 [published Online First: 2018/11/23]
