# Supplementary material for: Vaccination against COVID-19 and society’s return to normality in England: a modelling study of impacts of different types of naturally acquired and vaccine-induced immunity
Source: PubMed Central journal article supplement — BMJ Open. 2021 Nov 16;11(11):e053507. doi: 10.1136/bmjopen-2021-053507 (PMC8595291; doi:10.1136/bmjopen-2021-053507), 2021-11-16
Supplement: bmjopen-2021-053507supp002.pdf [file bmjopen-2021-053507supp002.pdf]

**Supplementary table 1:****Projected total and daily peaks of COVID-19 deaths by the end of 2024 in England under different scenarios of annual vaccination programmes****Assumptions and notes:**

- 75-90% vaccination coverage of individuals aged  $\geq 16$  years old.
- Initial overall vaccine efficacy: 62.5% after dose-1 and 85% after dose-2.
- The overall vaccine efficacy is equally attributable to the infection and disease protection.

| Scenario | Vaccination waves (interval days) | Long-term vaccine efficacy | Reduction in reinfectivity | Immunity duration (day): Natural /vaccine | Total COVID-19 deaths (2020-2024) | Daily peaks of COVID-19 deaths |      |      |
|----------|-----------------------------------|----------------------------|----------------------------|-------------------------------------------|-----------------------------------|--------------------------------|------|------|
|          |                                   |                            |                            |                                           |                                   | 2022                           | 2023 | 2024 |
| A1a1     | 1                                 | 85.0%                      | 60%                        | No waning                                 | 128,039                           | 28                             | 0    | 0    |
| A1a2     | 2 (365)                           | 85.0%                      | 60%                        | No waning                                 | 127,464                           | 28                             | 0    | 0    |
| A1a3     | 3 (365)                           | 85.0%                      | 60%                        | No waning                                 | 127,464                           | 28                             | 0    | 0    |
| A1a4     | 4 (365)                           | 85.0%                      | 60%                        | No waning                                 | 127,464                           | 28                             | 0    | 0    |
| A1b1     | 1                                 | 85.0%                      | 60%                        | 730/365                                   | 242,691                           | 28                             | 592  | 582  |
| A1b2     | 2 (365)                           | 85.0%                      | 60%                        | 730/365                                   | 154,956                           | 28                             | 0    | 592  |
| A1b3     | 3 (365)                           | 85.0%                      | 60%                        | 730/365                                   | 127,550                           | 28                             | 0    | 0    |
| A1b4     | 4 (365)                           | 85.0%                      | 60%                        | 730/365                                   | 127,550                           | 28                             | 0    | 0    |
| A1c1     | 1                                 | 85.0%                      | 60%                        | 365/182                                   | 239,044                           | 281                            | 452  | 56   |
| A1c2     | 2 (365)                           | 85.0%                      | 60%                        | 365/182                                   | 196,149                           | 89                             | 78   | 392  |
| A1c3     | 3 (365)                           | 85.0%                      | 60%                        | 365/182                                   | 155,320                           | 89                             | 2    | 109  |
| A1c4     | 4 (365)                           | 85.0%                      | 60%                        | 365/182                                   | 148,093                           | 89                             | 2    | 7    |
| B1a1     | 1                                 | 62.5%                      | 60%                        | No waning                                 | 144,586                           | 105                            | 0    | 0    |
| B1a2     | 2 (365)                           | 62.5%                      | 60%                        | No waning                                 | 142,720                           | 104                            | 0    | 0    |
| B1a3     | 3 (365)                           | 62.5%                      | 60%                        | No waning                                 | 142,720                           | 104                            | 0    | 0    |
| B1a4     | 4 (365)                           | 62.5%                      | 60%                        | No waning                                 | 142,720                           | 104                            | 0    | 0    |
| B1b1     | 1                                 | 62.5%                      | 60%                        | 730/365                                   | 320,789                           | 105                            | 952  | 950  |
| B1b2     | 2 (365)                           | 62.5%                      | 60%                        | 730/365                                   | 230,198                           | 104                            | 0    | 1066 |
| B1b3     | 3 (365)                           | 62.5%                      | 60%                        | 730/365                                   | 143,670                           | 104                            | 0    | 16   |
| B1b4     | 4 (365)                           | 62.5%                      | 60%                        | 730/365                                   | 143,233                           | 104                            | 0    | 0    |
| B1c1     | 1                                 | 62.5%                      | 60%                        | 365/182                                   | 353,663                           | 528                            | 536  | 407  |
| B1c2     | 2 (365)                           | 62.5%                      | 60%                        | 365/182                                   | 292,109                           | 351                            | 103  | 915  |
| B1c3     | 3 (365)                           | 62.5%                      | 60%                        | 365/182                                   | 225,230                           | 351                            | 2    | 412  |
| B1c4     | 4 (365)                           | 62.5%                      | 60%                        | 365/182                                   | 198,684                           | 351                            | 2    | 47   |
| A2a1     | 1                                 | 85.0%                      | 45%                        | No waning                                 | 132,749                           | 42                             | 0    | 0    |

|      |         |       |     |           |         |     |      |      |
|------|---------|-------|-----|-----------|---------|-----|------|------|
| A2a2 | 2 (365) | 85.0% | 45% | No waning | 131,963 | 42  | 0    | 0    |
| A2a3 | 3 (365) | 85.0% | 45% | No waning | 131,963 | 42  | 0    | 0    |
| A2a4 | 4 (365) | 85.0% | 45% | No waning | 131,963 | 42  | 0    | 0    |
| A2b1 | 1       | 85.0% | 45% | 730/365   | 265,799 | 42  | 627  | 243  |
| A2b2 | 2 (365) | 85.0% | 45% | 730/365   | 206,600 | 42  | 9    | 731  |
| A2b3 | 3 (365) | 85.0% | 45% | 730/365   | 159,912 | 42  | 0    | 582  |
| A2b4 | 4 (365) | 85.0% | 45% | 730/365   | 134,421 | 42  | 0    | 36   |
| A2c1 | 1       | 85.0% | 45% | 365/182   | 373,907 | 479 | 588  | 435  |
| A2c2 | 2 (365) | 85.0% | 45% | 365/182   | 266,690 | 151 | 675  | 628  |
| A2c3 | 3 (365) | 85.0% | 45% | 365/182   | 222,944 | 151 | 55   | 363  |
| A2c4 | 4 (365) | 85.0% | 45% | 365/182   | 194,661 | 151 | 55   | 168  |
| B2a1 | 1       | 62.5% | 45% | No waning | 163,679 | 209 | 0    | 0    |
| B2a2 | 2 (365) | 62.5% | 45% | No waning | 161,055 | 209 | 0    | 0    |
| B2a3 | 3 (365) | 62.5% | 45% | No waning | 161,055 | 209 | 0    | 0    |
| B2a4 | 4 (365) | 62.5% | 45% | No waning | 161,055 | 209 | 0    | 0    |
| B2b1 | 1       | 62.5% | 45% | 730/365   | 383,433 | 209 | 916  | 801  |
| B2b2 | 2 (365) | 62.5% | 45% | 730/365   | 304,138 | 209 | 13   | 1301 |
| B2b3 | 3 (365) | 62.5% | 45% | 730/365   | 236,662 | 209 | 0    | 952  |
| B2b4 | 4 (365) | 62.5% | 45% | 730/365   | 179,002 | 209 | 0    | 224  |
| B2c1 | 1       | 62.5% | 45% | 365/182   | 611,929 | 867 | 1542 | 2437 |
| B2c2 | 2 (365) | 62.5% | 45% | 365/182   | 443,176 | 615 | 1860 | 1096 |
| B2c3 | 3 (365) | 62.5% | 45% | 365/182   | 376,242 | 615 | 537  | 1092 |
| B2c4 | 4 (365) | 62.5% | 45% | 365/182   | ,016    | 615 | 537  | 886  |
| A3a1 | 1       | 85.0% | 30% | No waning | 138,595 | 64  | 0    | 0    |
| A3a2 | 2 (365) | 85.0% | 30% | No waning | 137,672 | 64  | 0    | 0    |
| A3a3 | 3 (365) | 85.0% | 30% | No waning | 137,672 | 64  | 0    | 0    |
| A3a4 | 4 (365) | 85.0% | 30% | No waning | 137,672 | 64  | 0    | 0    |
| A3b1 | 1       | 85.0% | 30% | 730/365   | 301,437 | 64  | 1235 | 218  |
| A3b2 | 2 (365) | 85.0% | 30% | 730/365   | 259,144 | 64  | 297  | 1645 |
| A3b3 | 3 (365) | 85.0% | 30% | 730/365   | 187,753 | 64  | 4    | 324  |
| A3b4 | 4 (365) | 85.0% | 30% | 730/365   | 152,926 | 64  | 4    | 131  |
| A3c1 | 1       | 85.0% | 30% | 365/182   | 498,043 | 743 | 764  | 1933 |
| A3c2 | 2 (365) | 85.0% | 30% | 365/182   | 321,779 | 208 | 537  | 599  |
| A3c3 | 3 (365) | 85.0% | 30% | 365/182   | 317,223 | 208 | 145  | 618  |
| A3c4 | 4 (365) | 85.0% | 30% | 365/182   | 229,664 | 208 | 145  | 96   |
| B3a1 | 1       | 62.5% | 30% | No waning | 188,227 | 366 | 0    | 0    |
| B3a2 | 2 (365) | 62.5% | 30% | No waning | 185,384 | 366 | 0    | 0    |
| B3a3 | 3 (365) | 62.5% | 30% | No waning | 185,384 | 366 | 0    | 0    |
| B3a4 | 4 (365) | 62.5% | 30% | No waning | 185,384 | 366 | 0    | 0    |
| B3b1 | 1       | 62.5% | 30% | 730/365   | 448,904 | 366 | 1093 | 649  |

|      |         |       |     |         |         |      |      |      |
|------|---------|-------|-----|---------|---------|------|------|------|
| B3b2 | 2 (365) | 62.5% | 30% | 730/365 | 392,651 | 366  | 98   | 2877 |
| B3b3 | 3 (365) | 62.5% | 30% | 730/365 | 291,181 | 366  | 3    | 720  |
| B3b4 | 4 (365) | 62.5% | 30% | 730/365 | 233,075 | 366  | 3    | 384  |
| B3c1 | 1       | 62.5% | 30% | 365/182 | 822,318 | 1095 | 2571 | 3202 |
| B3c2 | 2 (365) | 62.5% | 30% | 365/182 | 682,299 | 888  | 1714 | 5055 |
| B3c3 | 3 (365) | 62.5% | 30% | 365/182 | 627,017 | 888  | 616  | 3165 |
| B3c4 | 4 (365) | 62.5% | 30% | 365/182 | 430,219 | 888  | 616  | 1362 |
