# Supplementary material for: Vaccination against COVID-19 and society’s return to normality in England: a modelling study of impacts of different types of naturally acquired and vaccine-induced immunity
Source: PubMed Central journal article supplement — BMJ Open. 2021 Nov 16;11(11):e053507. doi: 10.1136/bmjopen-2021-053507 (PMC8595291; doi:10.1136/bmjopen-2021-053507), 2021-11-16
Supplement: bmjopen-2021-053507supp003.pdf [file bmjopen-2021-053507supp003.pdf]

**Supplementary table 2:****Projected total and daily peaks of COVID-19 deaths by the end of 2024 in England by revaccination frequency****Assumptions and notes:**

- Age-based 75-90% vaccination coverage of individuals aged 16+.
- Initial overall vaccine efficacy: 62.5% after dose-1 and 85% after dose-2.
- The overall vaccine efficacy is equally attributable to the infection and disease protection.

| Scenario | Vaccination waves (interval days) | Long-term vaccine efficacy | Reduction in reinfectivity | Immunity duration (day): Natural /vaccine | Total COVID-19 deaths (2020-2024) | Daily peaks of COVID-19 deaths |      |      |
|----------|-----------------------------------|----------------------------|----------------------------|-------------------------------------------|-----------------------------------|--------------------------------|------|------|
|          |                                   |                            |                            |                                           |                                   | 2022                           | 2023 | 2024 |
| FAa2     | 2 (730)                           | 85.0%                      | 60%                        | 730/365                                   | 140,596                           | 28                             | 42   | 22   |
| FAa3     | 3 (487)                           | 85.0%                      | 60%                        | 730/365                                   | 129,991                           | 28                             | 0    | 14   |
| FAa4     | 4 (365)                           | 85.0%                      | 60%                        | 730/365                                   | 127,550                           | 28                             | 0    | 0    |
| FAa5     | 5 (292)                           | 85.0%                      | 60%                        | 730/365                                   | 126,529                           | 22                             | 0    | 0    |
| FAa6     | 6 (243)                           | 85.0%                      | 60%                        | 730/365                                   | 125,523                           | 18                             | 0    | 0    |
| FAb2     | 2 (730)                           | 62.5%                      | 60%                        | 730/365                                   | 179,155                           | 105                            | 89   | 79   |
| FAb3     | 3 (487)                           | 62.5%                      | 60%                        | 730/365                                   | 154,959                           | 105                            | 1    | 56   |
| FAb4     | 4 (365)                           | 62.5%                      | 60%                        | 730/365                                   | 143,233                           | 104                            | 0    | 0    |
| FAb5     | 5 (292)                           | 62.5%                      | 60%                        | 730/365                                   | 139,718                           | 86                             | 0    | 0    |
| FAb6     | 6 (243)                           | 62.5%                      | 60%                        | 730/365                                   | 136,348                           | 71                             | 0    | 0    |
| FAc2     | 2 (730)                           | 85.0%                      | 60%                        | 365/182                                   | 217,980                           | 281                            | 385  | 0    |
| FAc3     | 3 (487)                           | 85.0%                      | 60%                        | 365/182                                   | 169,204                           | 196                            | 21   | 14   |
| FAc4     | 4 (365)                           | 85.0%                      | 60%                        | 365/182                                   | 148,093                           | 89                             | 2    | 7    |
| FAc5     | 5 (292)                           | 85.0%                      | 60%                        | 365/182                                   | 138,246                           | 48                             | 1    | 5    |
| FAc6     | 6 (243)                           | 85.0%                      | 60%                        | 365/182                                   | 133,413                           | 32                             | 0    | 1    |
| FAd2     | 2 (730)                           | 62.5%                      | 60%                        | 365/182                                   | 276,596                           | 528                            | 334  | 8    |
| FAd3     | 3 (487)                           | 62.5%                      | 60%                        | 365/182                                   | 253,667                           | 528                            | 46   | 212  |
| FAd4     | 4 (365)                           | 62.5%                      | 60%                        | 365/182                                   | 198,684                           | 351                            | 2    | 47   |
| FAd5     | 5 (292)                           | 62.5%                      | 60%                        | 365/182                                   | 173,428                           | 235                            | 0    | 26   |
| FAd6     | 6 (243)                           | 62.5%                      | 60%                        | 365/182                                   | 162,428                           | 156                            | 0    | 30   |
| FBa2     | 2 (730)                           | 85.0%                      | 45%                        | 730/365                                   | 158,901                           | 42                             | 207  | 2    |
| FBa3     | 3 (487)                           | 85.0%                      | 45%                        | 730/365                                   | 150,943                           | 42                             | 23   | 185  |
| FBa4     | 4 (365)                           | 85.0%                      | 45%                        | 730/365                                   | 134,421                           | 42                             | 0    | 36   |
| FBa5     | 5 (292)                           | 85.0%                      | 45%                        | 730/365                                   | 130,614                           | 34                             | 0    | 0    |
| FBa6     | 6 (243)                           | 85.0%                      | 45%                        | 730/365                                   | 129,085                           | 24                             | 0    | 0    |

|      |         |       |     |         |         |     |      |     |
|------|---------|-------|-----|---------|---------|-----|------|-----|
| FBb2 | 2 (730) | 62.5% | 45% | 730/365 | 230,119 | 209 | 181  | 175 |
| FBb3 | 3 (487) | 62.5% | 45% | 730/365 | 210,446 | 209 | 32   | 426 |
| FBb4 | 4 (365) | 62.5% | 45% | 730/365 | 179,002 | 209 | 0    | 224 |
| FBb5 | 5 (292) | 62.5% | 45% | 730/365 | 158,367 | 172 | 0    | 53  |
| FBb6 | 6 (243) | 62.5% | 45% | 730/365 | 150,833 | 148 | 0    | 10  |
| FBc2 | 2 (730) | 85.0% | 45% | 365/182 | 275,028 | 479 | 565  | 14  |
| FBc3 | 3 (487) | 85.0% | 45% | 365/182 | 231,322 | 377 | 87   | 231 |
| FBc4 | 4 (365) | 85.0% | 45% | 365/182 | 194,661 | 151 | 55   | 168 |
| FBc5 | 5 (292) | 85.0% | 45% | 365/182 | 170,881 | 80  | 49   | 102 |
| FBc6 | 6 (243) | 85.0% | 45% | 365/182 | 158,864 | 50  | 24   | 80  |
| FBd2 | 2 (730) | 62.5% | 45% | 365/182 | 400,280 | 867 | 1052 | 73  |
| FBd3 | 3 (487) | 62.5% | 45% | 365/182 | 397,725 | 867 | 507  | 522 |
| FBd4 | 4 (365) | 62.5% | 45% | 365/182 | 350,016 | 615 | 537  | 886 |
| FBd5 | 5 (292) | 62.5% | 45% | 365/182 | 278,879 | 390 | 314  | 540 |
| FBd6 | 6 (243) | 62.5% | 45% | 365/182 | 255,266 | 282 | 238  | 470 |

|      |         |       |     |         |         |      |      |      |
|------|---------|-------|-----|---------|---------|------|------|------|
| FCa2 | 2 (730) | 85.0% | 30% | 730/365 | 187,710 | 64   | 461  | 0    |
| FCa3 | 3 (487) | 85.0% | 30% | 730/365 | 181,301 | 64   | 286  | 455  |
| FCa4 | 4 (365) | 85.0% | 30% | 730/365 | 152,926 | 64   | 4    | 131  |
| FCa5 | 5 (292) | 85.0% | 30% | 730/365 | 144,263 | 48   | 0    | 58   |
| FCa6 | 6 (243) | 85.0% | 30% | 730/365 | 135,771 | 38   | 0    | 50   |
| FCb2 | 2 (730) | 62.5% | 30% | 730/365 | 289,900 | 366  | 251  | 349  |
| FCb3 | 3 (487) | 62.5% | 30% | 730/365 | 283,517 | 366  | 215  | 1173 |
| FCb4 | 4 (365) | 62.5% | 30% | 730/365 | 233,075 | 366  | 3    | 384  |
| FCb5 | 5 (292) | 62.5% | 30% | 730/365 | 215,885 | 318  | 0    | 228  |
| FCb6 | 6 (243) | 62.5% | 30% | 730/365 | 196,552 | 275  | 0    | 368  |
| FCc2 | 2 (730) | 85.0% | 30% | 365/182 | 460,413 | 743  | 764  | 1973 |
| FCc3 | 3 (487) | 85.0% | 30% | 365/182 | 306,941 | 564  | 488  | 550  |
| FCc4 | 4 (365) | 85.0% | 30% | 365/182 | 229,664 | 208  | 145  | 96   |
| FCc5 | 5 (292) | 85.0% | 30% | 365/182 | 207,684 | 106  | 189  | 130  |
| FCc6 | 6 (243) | 85.0% | 30% | 365/182 | 181,143 | 65   | 159  | 88   |
| FCd2 | 2 (730) | 62.5% | 30% | 365/182 | 674,854 | 1095 | 2328 | 5638 |
| FCd3 | 3 (487) | 62.5% | 30% | 365/182 | 548,250 | 1019 | 737  | 613  |
| FCd4 | 4 (365) | 62.5% | 30% | 365/182 | 430,219 | 888  | 616  | 1362 |
| FCd5 | 5 (292) | 62.5% | 30% | 365/182 | 336,705 | 543  | 527  | 255  |
| FCd6 | 6 (243) | 62.5% | 30% | 365/182 | 306,706 | 428  | 506  | 659  |
