# Supplementary material for: Vaccination against COVID-19 and society’s return to normality in England: a modelling study of impacts of different types of naturally acquired and vaccine-induced immunity
Source: PubMed Central journal article supplement — BMJ Open. 2021 Nov 16;11(11):e053507. doi: 10.1136/bmjopen-2021-053507 (PMC8595291; doi:10.1136/bmjopen-2021-053507), 2021-11-16
Supplement: bmjopen-2021-053507supp004.pdf [file bmjopen-2021-053507supp004.pdf]

**Supplementary table 3:****Projected total and daily peaks of COVID-19 deaths by the end of 2024 in England under different scenarios of uptake rate of vaccination in younger adults****Assumptions and notes:**

- Initial overall vaccine efficacy: 62.5% after dose-1 and 85% after dose-2.
- The overall vaccine efficacy is equally attributable to the infection and disease protection.
- Reinfectivity is reduced by 45%.

| Scenario | Uptake rate | Vaccination waves (interval days) | Long-term vaccine efficacy | Immunity duration (day): Natural /vaccine | Total COVID-19 deaths (2020-2024) | Daily peaks of COVID-19 deaths |      |      |
|----------|-------------|-----------------------------------|----------------------------|-------------------------------------------|-----------------------------------|--------------------------------|------|------|
|          |             |                                   |                            |                                           |                                   | 2022                           | 2023 | 2024 |

**Higher coverage in younger adults: age 16-29: 80%; age 30-39: 85%; age 40-49: 90%; age 50+: 90%**

|       |           |         |       |         |        |     |      |      |
|-------|-----------|---------|-------|---------|--------|-----|------|------|
| A2b1y | 0.80-0.90 | 1       | 85.0% | 730/365 | 269147 | 33  | 544  | 328  |
| A2b2y | 0.80-0.90 | 2 (365) | 85.0% | 730/365 | 203065 | 33  | 5    | 646  |
| A2b3y | 0.80-0.90 | 3 (365) | 85.0% | 730/365 | 149709 | 33  | 0    | 516  |
| A2b4y | 0.80-0.90 | 4 (365) | 85.0% | 730/365 | 131794 | 33  | 0    | 23   |
| A2c1y | 0.80-0.90 | 1       | 85.0% | 365/182 | 374300 | 652 | 681  | 597  |
| A2c2y | 0.80-0.90 | 2 (365) | 85.0% | 365/182 | 253530 | 114 | 454  | 438  |
| A2c3y | 0.80-0.90 | 3 (365) | 85.0% | 365/182 | 214420 | 114 | 41   | 215  |
| A2c4y | 0.80-0.90 | 4 (365) | 85.0% | 365/182 | 182710 | 114 | 41   | 82   |
| B2b1y | 0.80-0.90 | 1       | 62.5% | 730/365 | 380068 | 171 | 852  | 787  |
| B2b2y | 0.80-0.90 | 2 (365) | 62.5% | 730/365 | 294212 | 171 | 17   | 1339 |
| B2b3y | 0.80-0.90 | 3 (365) | 62.5% | 730/365 | 230951 | 171 | 0    | 813  |
| B2b4y | 0.80-0.90 | 4 (365) | 62.5% | 730/365 | 175249 | 171 | 0    | 187  |
| B2c1y | 0.80-0.90 | 1       | 62.5% | 365/182 | 618489 | 764 | 1506 | 1842 |
| B2c2y | 0.80-0.90 | 2 (365) | 62.5% | 365/182 | 425932 | 515 | 1578 | 875  |
| B2c3y | 0.80-0.90 | 3 (365) | 62.5% | 365/182 | 356424 | 515 | 465  | 877  |
| B2c4y | 0.80-0.90 | 4 (365) | 62.5% | 365/182 | 331865 | 515 | 465  | 695  |

**Moderate coverage in younger adults: age 16-29: 75%; age 30-39: 80%; age 40-49: 85%; age 50+: 90%**

|      |           |         |       |         |        |     |     |     |
|------|-----------|---------|-------|---------|--------|-----|-----|-----|
| A2b1 | 0.75-0.90 | 1       | 85.0% | 730/365 | 265799 | 42  | 627 | 243 |
| A2b2 | 0.75-0.90 | 2 (365) | 85.0% | 730/365 | 206600 | 42  | 9   | 731 |
| A2b3 | 0.75-0.90 | 3 (365) | 85.0% | 730/365 | 159912 | 42  | 0   | 582 |
| A2b4 | 0.75-0.90 | 4 (365) | 85.0% | 730/365 | 134421 | 42  | 0   | 36  |
| A2c1 | 0.75-0.90 | 1       | 85.0% | 365/182 | 373907 | 479 | 588 | 435 |
| A2c2 | 0.75-0.90 | 2 (365) | 85.0% | 365/182 | 266690 | 151 | 675 | 628 |
| A2c3 | 0.75-0.90 | 3 (365) | 85.0% | 365/182 | 222944 | 151 | 55  | 363 |
| A2c4 | 0.75-0.90 | 4 (365) | 85.0% | 365/182 | 194661 | 151 | 55  | 168 |

|      |           |         |       |         |        |     |      |      |
|------|-----------|---------|-------|---------|--------|-----|------|------|
| B2b1 | 0.75-0.90 | 1       | 62.5% | 730/365 | 383433 | 209 | 916  | 801  |
| B2b2 | 0.75-0.90 | 2 (365) | 62.5% | 730/365 | 304138 | 209 | 13   | 1301 |
| B2b3 | 0.75-0.90 | 3 (365) | 62.5% | 730/365 | 236662 | 209 | 0    | 952  |
| B2b4 | 0.75-0.90 | 4 (365) | 62.5% | 730/365 | 179002 | 209 | 0    | 224  |
| B2c1 | 0.75-0.90 | 1       | 62.5% | 365/182 | 611929 | 867 | 1542 | 2437 |
| B2c2 | 0.75-0.90 | 2 (365) | 62.5% | 365/182 | 443176 | 615 | 1860 | 1096 |
| B2c3 | 0.75-0.90 | 3 (365) | 62.5% | 365/182 | 376242 | 615 | 537  | 1092 |
| B2c4 | 0.75-0.90 | 4 (365) | 62.5% | 365/182 | 350016 | 615 | 537  | 886  |

**Lower vaccination coverage in younger adults: age 16-29: 60%; age 30-39: 70%; age 40-49: 80%; age 50+: 90%**

|       |           |         |       |         |        |     |      |      |
|-------|-----------|---------|-------|---------|--------|-----|------|------|
| A2b1x | 0.60-0.90 | 1       | 85.0% | 730/365 | 266219 | 67  | 638  | 209  |
| A2b2x | 0.60-0.90 | 2 (365) | 85.0% | 730/365 | 214159 | 67  | 14   | 761  |
| A2b3x | 0.60-0.90 | 3 (365) | 85.0% | 730/365 | 171971 | 67  | 0    | 562  |
| A2b4x | 0.60-0.90 | 4 (365) | 85.0% | 730/365 | 140179 | 67  | 0    | 46   |
| A2c1x | 0.60-0.90 | 1       | 85.0% | 365/182 | 379362 | 477 | 550  | 353  |
| A2c2x | 0.60-0.90 | 2 (365) | 85.0% | 365/182 | 290730 | 243 | 1064 | 1066 |
| A2c3x | 0.60-0.90 | 3 (365) | 85.0% | 365/182 | 243384 | 243 | 46   | 548  |
| A2c4x | 0.60-0.90 | 4 (365) | 85.0% | 365/182 | 209857 | 243 | 46   | 255  |
| B2b1x | 0.60-0.90 | 1       | 62.5% | 730/365 | 398443 | 306 | 1376 | 1052 |
| B2b2x | 0.60-0.90 | 2 (365) | 62.5% | 730/365 | 333844 | 306 | 3    | 1150 |
| B2b3x | 0.60-0.90 | 3 (365) | 62.5% | 730/365 | 237005 | 306 | 0    | 1250 |
| B2b4x | 0.60-0.90 | 4 (365) | 62.5% | 730/365 | 185126 | 306 | 0    | 240  |
| B2c1x | 0.60-0.90 | 1       | 62.5% | 365/182 | 520700 | 977 | 1747 | 1732 |
| B2c2x | 0.60-0.90 | 2 (365) | 62.5% | 365/182 | 470214 | 814 | 2238 | 1526 |
| B2c3x | 0.60-0.90 | 3 (365) | 62.5% | 365/182 | 406564 | 814 | 563  | 1408 |
| B2c4x | 0.60-0.90 | 4 (365) | 62.5% | 365/182 | 377531 | 814 | 563  | 1140 |
